# Supplementary material
Source: publisher figshare collection journal article supplement (https://gsajournals.figshare.com/ndownloader/files/22015059)
Supplement: Supplementary file 1 [file 22015059]

## Sheet: all_samples.feature
Gene_id	Chr	Start	End	Strand	Length	KT30_S1	KT30_S2	KT30_S3	KT30_S4	KT30_S5	KT60_S1	KT60_S2	KT60_S3	KT60_S4	KT60_S5	T30_S1	T30_S2	T30_S3	T30_S4	T30_S5	T60_S1	T60_S2	T60_S3	T60_S4	T60_S5	V30_S1	V30_S2	V30_S3	V30_S4	V30_S5	V60_S1	V60_S2	V60_S3	V60_S4	V60_S5
ENSONIG00000002426	GL831133.1;GL831133.1;GL831133.1	21;447;2816	338;654;3571	-;-;-	1282	60	105	48	55	85	93	55	167	74	73	121	40	74	79	118	60	98	88	43	88	71	66	92	55	86	42	49	57	34	60
ENSONIG00000002427	GL831133.1;GL831133.1;GL831133.1;GL831133.1;GL831133.1;GL831133.1;GL831133.1;GL831133.1;GL831133.1;GL831133.1;GL831133.1;GL831133.1;GL831133.1	10323;11630;14986;17879;21015;21262;23206;23346;24293;24629;24973;25539;25856	10531;11748;15133;18121;21140;21361;23250;23469;24396;24725;25122;25713;25947	+;+;+;+;+;+;+;+;+;+;+;+;+	1732	15	36	0	12	38	40	28	19	6	20	17	12	5	4	29	17	20	12	3	0	24	7	17	13	55	54	4	6	6	9
ENSONIG00000002434	GL831133.1;GL831133.1;GL831133.1;GL831133.1;GL831133.1;GL831133.1	38364;43109;43210;45013;47081;49801	38446;43149;43416;45078;47278;49955	+;+;+;+;+;+	750	333	428	231	374	339	610	294	407	367	365	310	295	343	379	422	271	362	343	248	398	313	312	381	322	353	359	318	346	149	319
ENSONIG00000002440	GL831133.1;GL831133.1;GL831133.1;GL831133.1;GL831133.1;GL831133.1;GL831133.1;GL831133.1;GL831133.1;GL831133.1;GL831133.1;GL831133.1;GL831133.1;GL831133.1;GL831133.1;GL831133.1;GL831133.1;GL831133.1;GL831133.1;GL831133.1;GL831133.1;GL831133.1;GL831133.1;GL831133.1;GL831133.1;GL831133.1;GL831133.1;GL831133.1;GL831133.1;GL831133.1;GL831133.1;GL831133.1;GL831133.1;GL831133.1	87632;138960;139246;139248;156872;156872;191191;191191;193626;193626;206082;206082;209010;209019;210781;210781;216404;216404;216844;216844;223963;226095;226095;226423;230445;230445;231249;231249;237328;237328;252908;252908;253613;262157	87694;139030;139387;139387;157046;157046;191387;191387;193758;193758;206351;206351;209348;209348;211080;211080;216670;216670;216975;216992;223982;226275;226275;226446;230597;230597;231404;231404;237458;237458;253016;253016;253680;267175	+;+;+;+;+;+;+;+;+;+;+;+;+;+;+;+;+;+;+;+;+;+;+;+;+;+;+;+;+;+;+;+;+;+	7967	507	638	323	560	474	381	407	319	350	646	699	390	648	523	540	582	413	277	316	260	398	548	635	687	528	300	371	283	272	442
ENSONIG00000002453	GL831133.1;GL831133.1;GL831133.1;GL831133.1;GL831133.1;GL831133.1;GL831133.1;GL831133.1;GL831133.1;GL831133.1;GL831133.1	535520;535931;537604;537759;537942;538095;538211;539755;540010;540674;541221	535579;535963;537657;537856;538002;538131;538250;539805;540082;540764;541294	+;+;+;+;+;+;+;+;+;+;+	672	295	558	310	359	365	635	315	505	393	337	484	287	424	417	537	385	351	329	259	348	336	381	422	335	687	406	338	324	190	323
ENSONIG00000002459	GL831133.1;GL831133.1;GL831133.1;GL831133.1;GL831133.1;GL831133.1;GL831133.1;GL831133.1;GL831133.1;GL831133.1;GL831133.1;GL831133.1	543370;543370;543660;543660;544035;544035;544554;544590;544590;544788;544788;545766	543517;543517;543721;543721;544151;544162;544564;544652;544652;544944;544951;546314	-;-;-;-;-;-;-;-;-;-;-;-	1125	217	261	144	209	196	350	164	278	223	191	252	219	227	234	314	274	233	195	145	144	196	184	348	265	298	223	142	163	135	202
ENSONIG00000002462	GL831133.1;GL831133.1;GL831133.1;GL831133.1;GL831133.1;GL831133.1;GL831133.1;GL831133.1;GL831133.1;GL831133.1;GL831133.1;GL831133.1;GL831133.1;GL831133.1;GL831133.1;GL831133.1;GL831133.1;GL831133.1;GL831133.1;GL831133.1;GL831133.1;GL831133.1;GL831133.1;GL831133.1;GL831133.1;GL831133.1;GL831133.1;GL831133.1	547242;549796;550908;550908;551158;551235;551235;552022;552022;552208;552208;553128;553128;553347;553347;553594;553594;554314;554314;555093;555093;557578;557578;557840;557840;558023;558023;558823	549940;549940;551131;551092;551184;551369;551369;552125;552125;552404;552404;553238;553238;553480;553480;553726;553726;554354;554354;555245;555245;557742;557742;557932;557932;558277;558336;559153	-;-;-;-;-;-;-;-;-;-;-;-;-;-;-;-;-;-;-;-;-;-;-;-;-;-;-;-	4861	4105	6275	3093	5501	4850	6817	3750	5279	4104	4470	4657	3238	4894	5247	6715	3700	5803	4319	3226	3566	4018	4033	4876	3979	5085	4462	3808	3694	2324	3706
ENSONIG00000002474	GL831133.1;GL831133.1;GL831133.1;GL831133.1	567995;568165;568226;569296	568020;569011;569089;569322	+;+;+;+	978	41	33	40	11	23	30	26	32	14	29	18	56	25	68	36	11	29	13	3	14	34	30	23	22	37	17	28	7	19	18
ENSONIG00000020596	GL831133.1	570567	571658	+	1092	83	118	116	116	122	96	42	120	77	69	82	142	145	105	155	52	90	54	69	59	67	71	153	78	106	89	37	70	19	54
ENSONIG00000002475	GL831133.1;GL831133.1;GL831133.1;GL831133.1;GL831133.1;GL831133.1;GL831133.1;GL831133.1;GL831133.1;GL831133.1;GL831133.1;GL831133.1;GL831133.1;GL831133.1;GL831133.1;GL831133.1	575766;576225;576845;583546;584124;584429;585481;586068;586750;587158;589635;590541;591022;593259;593627;596532	576044;576377;576973;583659;584238;584524;585535;586178;586882;587200;589936;590774;591220;593463;593822;596693	+;+;+;+;+;+;+;+;+;+;+;+;+;+;+;+	2526	1	3	1	1	1	4	0	10	1	1	0	1	0	1	4	2	1	6	0	1	1	6	5	3	0	6	0	1	0	0
ENSONIG00000002481	GL831133.1;GL831133.1;GL831133.1;GL831133.1;GL831133.1;GL831133.1;GL831133.1;GL831133.1;GL831133.1;GL831133.1;GL831133.1;GL831133.1;GL831133.1;GL831133.1;GL831133.1;GL831133.1;GL831133.1;GL831133.1;GL831133.1	599137;613853;613861;617580;617580;617834;617834;622333;622333;622920;622920;623609;623609;635886;635886;641754;641754;643020;658948	603769;614943;614943;617706;617706;617889;617889;622473;622473;623092;623092;623808;623808;636048;636048;642938;642936;643036;659566	-;-;-;-;-;-;-;-;-;-;-;-;-;-;-;-;-;-;-	8405	126	157	143	110	101	132	85	175	168	98	69	114	207	220	139	91	171	95	112	146	105	152	148	101	67	94	88	92	35	124
ENSONIG00000020597	GL831133.1	666062	667741	+	1680	112	165	84	103	139	263	89	172	70	113	99	146	162	169	198	108	163	114	82	60	103	89	211	149	222	173	104	109	47	80
ENSONIG00000002485	GL831133.1;GL831133.1;GL831133.1;GL831133.1;GL831133.1;GL831133.1;GL831133.1;GL831133.1;GL831133.1;GL831133.1;GL831133.1;GL831133.1;GL831133.1;GL831133.1;GL831133.1;GL831133.1;GL831133.1;GL831133.1;GL831133.1;GL831133.1;GL831133.1;GL831133.1;GL831133.1;GL831133.1;GL831133.1;GL831133.1;GL831133.1;GL831133.1;GL831133.1;GL831133.1;GL831133.1;GL831133.1;GL831133.1;GL831133.1;GL831133.1;GL831133.1;GL8…	670419;694020;715453;715489;716559;716559;718912;718912;719203;719203;720587;720587;721077;721077;721356;721530;721530;723317;723317;723747;724350;724369;724875;724875;725817;725817;726146;726146;726394;726394;727286;727286;728440;728440;729092;729092;731888;731888;732109;732109;735636;735636;738028;738028;738844;738844;739106;739106;739595;739595;739989;739989;740307;740307;741165;741165;742583;…	670563;694067;715624;715624;716656;716656;719041;719041;719355;719355;720729;720729;721204;721228;721419;721634;721634;723472;723472;723765;724451;724451;724951;724951;725997;725997;726259;726259;726502;726502;727494;727494;728538;728538;729259;729259;732022;732022;732268;732268;735802;735802;738156;738156;738957;738957;739219;739219;739729;739729;740117;740117;740409;740409;741373;741373;742702;…	+;+;+;+;+;+;+;+;+;+;+;+;+;+;+;+;+;+;+;+;+;+;+;+;+;+;+;+;+;+;+;+;+;+;+;+;+;+;+;+;+;+;+;+;+;+;+;+;+;+;+;+;+;+;+;+;+;+;+;+;+;+;+;+;+;+;+;+;+;+;+;+;+;+;+;+;+;+;+;+;+;+;+;+;+;+;+;+;+;+;+;+;+;+;+;+;+;+;+;+;+;+;+;+;+;+;+;+	7974	1563	2551	1307	1187	1286	1795	1485	2025	1998	1442	1122	1509	2493	1842	1733	1266	1684	1345	1611	1621	1913	2369	2213	2179	982	1378	1485	1474	585	1527
ENSONIG00000022069	GL831133.1	763924	764034	+	111	0	0	0	0	0	0	0	0	0	2	1	0	0	0	0	0	0	1	0	0	1	0	1	3	0	0	0	0	0	1
ENSONIG00000002507	GL831133.1;GL831133.1;GL831133.1;GL831133.1;GL831133.1;GL831133.1;GL831133.1;GL831133.1;GL831133.1;GL831133.1	773459;774072;776257;777243;777509;777709;777903;778200;778886;779339	773594;774197;776390;777360;777579;777784;777965;778269;778964;779941	+;+;+;+;+;+;+;+;+;+	1476	73	138	77	95	66	92	63	66	153	67	103	94	97	83	107	62	127	109	159	157	108	103	65	103	28	95	78	144	34	79
ENSONIG00000002510	GL831133.1;GL831133.1;GL831133.1;GL831133.1;GL831133.1;GL831133.1;GL831133.1;GL831133.1	784306;784445;784797;785583;787182;788742;788977;789527	784359;784539;784929;785670;787274;788894;789142;789920	+;+;+;+;+;+;+;+	1176	457	764	386	453	688	854	394	619	525	476	433	327	560	558	720	423	494	429	306	377	525	367	536	473	667	421	462	374	288	442
ENSONIG00000002513	GL831133.1;GL831133.1;GL831133.1;GL831133.1;GL831133.1;GL831133.1;GL831133.1;GL831133.1;GL831133.1;GL831133.1;GL831133.1	792250;793821;804874;824626;826163;827380;828859;831687;832634;836967;837116	793062;793958;805065;824780;826236;827436;828997;831802;832829;837029;839535	+;+;+;+;+;+;+;+;+;+;+	4363	965	1431	694	1271	1205	1704	935	1524	942	1110	1311	662	933	1261	1473	1113	1250	942	647	1034	994	1160	1277	1233	1507	929	1026	785	509	913
ENSONIG00000002516	GL831133.1;GL831133.1;GL831133.1;GL831133.1;GL831133.1;GL831133.1	850807;851362;851943;853257;854239;854713	851005;851551;852205;853540;854406;855824	+;+;+;+;+;+	2216	8	2	6	6	0	12	5	11	7	5	0	2	8	31	4	6	14	8	9	3	5	10	0	12	6	9	2	12	8	4
ENSONIG00000002518	GL831133.1;GL831133.1;GL831133.1;GL831133.1;GL831133.1;GL831133.1;GL831133.1;GL831133.1;GL831133.1;GL831133.1;GL831133.1;GL831133.1;GL831133.1;GL831133.1;GL831133.1;GL831133.1;GL831133.1;GL831133.1;GL831133.1;GL831133.1;GL831133.1;GL831133.1;GL831133.1;GL831133.1;GL831133.1;GL831133.1;GL831133.1;GL831133.1;GL831133.1;GL831133.1;GL831133.1	941044;941151;941744;941744;942482;942482;943436;943436;943560;943560;944200;944200;944492;944492;944959;944959;945198;945198;946014;946014;946844;946844;947155;947155;947563;947907;948368;948406;948450;948672;948672	941186;941186;941844;941844;942556;942556;943470;943470;943666;943666;944262;944262;944584;944584;945004;945004;945277;945277;946112;946112;946940;946940;947182;947251;947651;948057;948394;948521;948521;948803;948803	+;+;+;+;+;+;+;+;+;+;+;+;+;+;+;+;+;+;+;+;+;+;+;+;+;+;+;+;+;+;+	1551	29	45	6	11	3	13	9	20	16	21	28	19	34	7	58	16	13	8	11	7	18	18	43	24	5	11	14	22	9	34
ENSONIG00000002530	GL831133.1;GL831133.1;GL831133.1;GL831133.1;GL831133.1;GL831133.1;GL831133.1	948024;953067;953266;953587;954069;955151;956665	952556;953150;953418;953688;954143;955342;956881	-;-;-;-;-;-;-	5356	18068	21777	12519	20725	19807	22686	13924	20725	16367	16862	22081	15396	21121	21124	28049	15663	17652	13566	11089	13752	17652	18817	21678	17794	14018	14646	11845	12064	8404	13889
ENSONIG00000002537	GL831133.1;GL831133.1;GL831133.1	962964;963502;963908	963405;963689;964133	-;-;-	856	740	1042	459	1209	1424	1812	737	1241	992	924	1392	731	968	1165	1976	1014	1042	941	563	683	1066	1113	1087	832	2201	840	711	726	494	704
ENSONIG00000002538	GL831133.1;GL831133.1;GL831133.1;GL831133.1;GL831133.1;GL831133.1	965205;966593;968561;969012;970140;970664	966504;966650;968680;969161;970249;970918	-;-;-;-;-;-	1993	1713	2626	1239	2110	2279	2901	1655	2790	1912	1973	2589	1876	2256	2400	3832	2310	2486	1830	1343	1661	1875	2127	2421	1920	3652	1979	1587	1512	1025	1723
ENSONIG00000002545	GL831133.1;GL831133.1;GL831133.1;GL831133.1;GL831133.1;GL831133.1;GL831133.1;GL831133.1;GL831133.1;GL831133.1;GL831133.1;GL831133.1;GL831133.1;GL831133.1;GL831133.1;GL831133.1;GL831133.1;GL831133.1;GL831133.1;GL831133.1	975426;977633;978196;978521;978815;979182;979326;979566;980085;980884;981509;981804;981849;982167;983652;984626;985043;985632;986973;987312	977504;977681;978413;978609;979089;979217;979453;979713;980835;981385;981717;981814;982116;982262;984592;984906;985160;985753;987142;987377	-;-;-;-;-;-;-;-;-;-;-;-;-;-;-;-;-;-;-;-	6557	27	48	14	12	0	0	7	36	15	2	12	7	19	24	0	0	25	7	4	46	15	13	17	28	1	11	0	8	15	20
ENSONIG00000002547	GL831133.1;GL831133.1;GL831133.1;GL831133.1;GL831133.1;GL831133.1;GL831133.1;GL831133.1;GL831133.1;GL831133.1	993071;993234;993533;993883;994183;994567;994802;995096;995327;995616	993126;993454;993684;994023;994350;994707;994956;995214;995521;995830	-;-;-;-;-;-;-;-;-;-	1563	207	288	122	229	198	203	131	213	309	214	393	226	302	293	205	204	282	287	124	167	215	136	230	261	279	229	123	209	156	219
ENSONIG00000002554	GL831133.1;GL831133.1;GL831133.1;GL831133.1;GL831133.1;GL831133.1;GL831133.1;GL831133.1;GL831133.1;GL831133.1;GL831133.1;GL831133.1;GL831133.1;GL831133.1;GL831133.1;GL831133.1;GL831133.1;GL831133.1;GL831133.1;GL831133.1;GL831133.1;GL831133.1;GL831133.1;GL831133.1;GL831133.1;GL831133.1;GL831133.1;GL831133.1;GL831133.1;GL831133.1;GL831133.1;GL831133.1	998151;1054619;1054637;1056300;1056300;1056466;1056466;1059930;1059930;1062927;1062927;1064549;1064549;1064753;1064753;1065555;1065555;1066045;1066045;1066218;1066218;1066397;1066397;1066581;1066581;1067546;1068710;1069453;1070332;1071159;1071279;1071984	998252;1054741;1054741;1056342;1056342;1056544;1056544;1060027;1060027;1063050;1063050;1064636;1064636;1064841;1064841;1065618;1065618;1066136;1066136;1066292;1066292;1066465;1066465;1066608;1066687;1067647;1068729;1069505;1070391;1071751;1071709;1072016	+;+;+;+;+;+;+;+;+;+;+;+;+;+;+;+;+;+;+;+;+;+;+;+;+;+;+;+;+;+;+;+	2014	201	356	149	271	160	261	128	231	202	275	250	185	229	241	328	212	280	203	148	190	209	246	283	242	262	233	200	186	146	156
ENSONIG00000002557	GL831133.1;GL831133.1;GL831133.1;GL831133.1;GL831133.1;GL831133.1;GL831133.1;GL831133.1;GL831133.1;GL831133.1;GL831133.1;GL831133.1	1077466;1077815;1077960;1078226;1078436;1078628;1079028;1079323;1079630;1079858;1080481;1080808	1077712;1077868;1078112;1078324;1078551;1078786;1079181;1079393;1079731;1079975;1080539;1080900	-;-;-;-;-;-;-;-;-;-;-;-	1425	69	98	41	41	37	42	47	117	50	16	63	38	47	75	53	51	41	58	22	53	42	45	32	59	65	83	28	75	19	40
ENSONIG00000002559	GL831133.1;GL831133.1;GL831133.1;GL831133.1;GL831133.1;GL831133.1;GL831133.1;GL831133.1;GL831133.1;GL831133.1;GL831133.1;GL831133.1	1082042;1083210;1084676;1085081;1085240;1085442;1085597;1086367;1086579;1086920;1087165;1088096	1083124;1083338;1084782;1085149;1085321;1085497;1085683;1086471;1086649;1087025;1087196;1088244	-;-;-;-;-;-;-;-;-;-;-;-	2076	46	15	38	17	22	14	18	63	28	15	32	18	21	33	60	31	12	0	13	0	8	10	59	16	26	32	62	7	16	28
ENSONIG00000002561	GL831133.1;GL831133.1;GL831133.1;GL831133.1;GL831133.1;GL831133.1;GL831133.1;GL831133.1;GL831133.1;GL831133.1;GL831133.1;GL831133.1;GL831133.1;GL831133.1;GL831133.1;GL831133.1;GL831133.1;GL831133.1;GL831133.1;GL831133.1;GL831133.1;GL831133.1;GL831133.1;GL831133.1;GL831133.1;GL831133.1;GL831133.1	1090018;1091242;1091472;1091665;1092683;1092979;1093255;1093460;1093984;1094235;1094709;1096583;1097073;1100301;1101245;1101546;1102544;1102843;1103448;1103962;1104318;1104921;1105127;1107131;1107985;1110674;1116454	1090110;1091310;1091589;1091744;1092880;1093063;1093361;1093520;1094096;1094341;1094882;1096699;1097446;1100549;1101327;1101688;1102607;1103003;1103566;1104071;1104511;1105000;1105380;1107223;1108132;1110780;1116729	-;-;-;-;-;-;-;-;-;-;-;-;-;-;-;-;-;-;-;-;-;-;-;-;-;-;-	3777	2911	4798	2328	3635	3380	5646	2643	4035	3502	3884	3739	2363	3679	3840	3524	3314	4169	3119	2799	3158	2734	3339	3550	3437	3730	3425	3143	2969	1787	2838
ENSONIG00000002569	GL831133.1;GL831133.1;GL831133.1;GL831133.1;GL831133.1;GL831133.1;GL831133.1	1134583;1139141;1139520;1139714;1140082;1141988;1142416	1138932;1139345;1139636;1139875;1140273;1142128;1142669	-;-;-;-;-;-;-	5421	2637	3780	2306	2629	2348	3571	2078	3310	3188	2633	2259	2269	3050	3199	3417	2163	3164	2534	1911	2519	2664	2606	2662	2316	2869	2305	1987	2276	1198	2298
ENSONIG00000021863	GL831133.1	1136810	1136904	+	95	0	0	0	0	0	0	0	0	0	0	0	0	0	0	0	0	0	0	0	0	0	0	0	0	0	0	0	0	0	0
ENSONIG00000002572	GL831133.1;GL831133.1;GL831133.1;GL831133.1;GL831133.1;GL831133.1;GL831133.1	1143561;1143726;1143844;1144365;1144365;1145670;1145670	1143991;1143766;1143991;1144610;1144610;1147524;1145879	+;+;+;+;+;+;+	2532	325	572	178	271	298	424	186	345	367	300	330	275	283	331	529	328	361	313	318	240	306	406	410	270	612	308	254	267	136	305
ENSONIG00000002577	GL831133.1;GL831133.1;GL831133.1;GL831133.1;GL831133.1;GL831133.1;GL831133.1;GL831133.1;GL831133.1;GL831133.1;GL831133.1	1147931;1149051;1149276;1149592;1149848;1150121;1150579;1150866;1151230;1151428;1151641	1148301;1149142;1149441;1149752;1149991;1150257;1150730;1150978;1151327;1151520;1152230	+;+;+;+;+;+;+;+;+;+;+	2117	217	325	179	142	103	228	122	337	110	136	98	133	151	169	152	96	187	136	77	188	153	345	281	222	147	310	102	188	82	240
ENSONIG00000002589	GL831133.1;GL831133.1;GL831133.1;GL831133.1;GL831133.1	1153335;1156697;1157203;1159961;1160700	1155346;1156868;1157394;1160654;1161565	-;-;-;-;-	3936	1126	1676	693	1222	1026	1722	955	1387	1194	1069	1311	969	1758	1572	1656	1072	1402	957	900	967	1012	1211	1445	1305	1820	1041	1096	1079	511	940
ENSONIG00000026367	GL831133.1;GL831133.1;GL831133.1	1211176;1211869;1216950	1211227;1212391;1217037	-;-;-	663	11	26	18	17	10	19	19	10	12	31	7	9	30	19	11	29	8	11	9	6	14	18	18	32	3	17	11	13	5	18
ENSONIG00000002592	GL831133.1;GL831133.1;GL831133.1;GL831133.1;GL831133.1;GL831133.1;GL831133.1;GL831133.1;GL831133.1;GL831133.1;GL831133.1;GL831133.1;GL831133.1;GL831133.1;GL831133.1;GL831133.1;GL831133.1;GL831133.1;GL831133.1;GL831133.1;GL831133.1;GL831133.1;GL831133.1;GL831133.1;GL831133.1;GL831133.1;GL831133.1;GL831133.1;GL831133.1;GL831133.1;GL831133.1	1220361;1234113;1248403;1249744;1249928;1250094;1250108;1251109;1251109;1251658;1251658;1255183;1255183;1255692;1255692;1256314;1256314;1261146;1261146;1261837;1261837;1262537;1262537;1262864;1262864;1265453;1265453;1265935;1265950;1267772;1267772	1220621;1234552;1248449;1249799;1249992;1250254;1250254;1251171;1251171;1251756;1251756;1255294;1255294;1255808;1255808;1256471;1256471;1261327;1261327;1261987;1261987;1262747;1262747;1262979;1262979;1265610;1265610;1266041;1266041;1268541;1268541	+;+;+;+;+;+;+;+;+;+;+;+;+;+;+;+;+;+;+;+;+;+;+;+;+;+;+;+;+;+;+	3274	561	818	400	482	560	742	528	597	572	765	505	345	601	659	436	510	572	454	392	419	481	543	803	511	419	538	454	436	321	610
ENSONIG00000002598	GL831133.1;GL831133.1;GL831133.1;GL831133.1;GL831133.1;GL831133.1;GL831133.1;GL831133.1;GL831133.1;GL831133.1;GL831133.1;GL831133.1;GL831133.1;GL831133.1;GL831133.1;GL831133.1;GL831133.1;GL831133.1;GL831133.1;GL831133.1;GL831133.1;GL831133.1;GL831133.1;GL831133.1;GL831133.1	1323031;1323171;1323856;1323856;1342312;1342312;1344408;1344408;1347421;1347421;1350162;1350162;1350735;1350735;1351052;1351052;1351624;1352180;1352212;1352583;1352583;1352850;1352850;1353374;1353374	1323308;1323308;1323903;1323903;1342439;1342439;1344571;1344571;1347665;1347665;1350286;1350286;1350837;1350837;1351587;1351532;1351663;1352231;1352231;1352754;1352754;1352894;1352894;1353484;1357787	+;+;+;+;+;+;+;+;+;+;+;+;+;+;+;+;+;+;+;+;+;+;+;+;+	6350	320	463	271	362	285	663	261	522	395	304	278	296	508	353	532	341	441	376	235	275	362	380	451	348	503	375	406	280	117	203
ENSONIG00000002602	GL831133.1;GL831133.1;GL831133.1;GL831133.1;GL831133.1;GL831133.1;GL831133.1;GL831133.1;GL831133.1;GL831133.1;GL831133.1;GL831133.1;GL831133.1;GL831133.1;GL831133.1;GL831133.1;GL831133.1	1359454;1360408;1361282;1362102;1362293;1362466;1363404;1363647;1365830;1366169;1366394;1367910;1368198;1368579;1368828;1369117;1379502	1359496;1360491;1361483;1362166;1362371;1362539;1363473;1363803;1365894;1366255;1366525;1368117;1368258;1368735;1369014;1369197;1382665	+;+;+;+;+;+;+;+;+;+;+;+;+;+;+;+;+	4916	32	55	11	16	32	22	22	53	11	40	54	25	18	12	20	19	51	27	5	30	25	45	49	45	30	60	49	15	3	51
ENSONIG00000002603	GL831133.1;GL831133.1;GL831133.1;GL831133.1	1379307;1380278;1381997;1383753	1379812;1380482;1382598;1384226	-;-;-;-	1787	48	46	40	32	38	55	52	90	69	75	52	58	57	33	57	45	91	89	29	34	62	45	54	34	65	102	44	50	23	56
ENSONIG00000002606	GL831133.1;GL831133.1;GL831133.1;GL831133.1;GL831133.1;GL831133.1;GL831133.1;GL831133.1;GL831133.1;GL831133.1;GL831133.1;GL831133.1;GL831133.1;GL831133.1;GL831133.1;GL831133.1;GL831133.1;GL831133.1;GL831133.1;GL831133.1;GL831133.1;GL831133.1;GL831133.1;GL831133.1;GL831133.1;GL831133.1;GL831133.1;GL831133.1;GL831133.1;GL831133.1;GL831133.1	1392133;1393872;1393872;1394068;1394068;1395272;1395272;1395449;1395449;1395871;1395871;1396143;1396143;1396843;1396843;1397161;1397161;1397511;1397511;1398763;1398763;1400425;1401503;1401503;1402055;1402055;1404169;1404169;1406810;1406810;1407542	1392498;1393982;1393982;1394250;1394250;1395361;1395361;1395582;1395582;1396031;1396031;1396239;1396239;1396944;1396944;1397242;1397242;1397585;1397585;1398819;1398819;1400478;1401602;1401602;1402135;1402135;1404329;1404329;1406869;1406843;1408117	+;+;+;+;+;+;+;+;+;+;+;+;+;+;+;+;+;+;+;+;+;+;+;+;+;+;+;+;+;+;+	2490	1290	1904	951	1791	1580	2128	1265	2116	1403	1491	1811	1234	1879	1985	2716	1426	1808	1480	1058	1217	1373	1457	1856	1578	2044	1368	1189	1260	836	1476
ENSONIG00000002611	GL831133.1;GL831133.1;GL831133.1;GL831133.1;GL831133.1;GL831133.1;GL831133.1;GL831133.1;GL831133.1;GL831133.1;GL831133.1;GL831133.1;GL831133.1;GL831133.1;GL831133.1;GL831133.1;GL831133.1;GL831133.1;GL831133.1;GL831133.1;GL831133.1;GL831133.1;GL831133.1;GL831133.1;GL831133.1;GL831133.1;GL831133.1;GL831133.1;GL831133.1;GL831133.1;GL831133.1;GL831133.1;GL831133.1;GL831133.1;GL831133.1;GL831133.1;GL8…	1427592;1429089;1432831;1433285;1437527;1437896;1476699;1478461;1479766;1481141;1481663;1481898;1482045;1483258;1483509;1483882;1484535;1484933;1488822;1489141;1491224;1492113;1492420;1492725;1493236;1493733;1495594;1496242;1496895;1497204;1501112;1501341;1513327;1513800;1515327;1515795;1516155;1517353	1427674;1429127;1433038;1433498;1437651;1438067;1476873;1478584;1479838;1481241;1481797;1481951;1482185;1483386;1483786;1484110;1484690;1485076;1488950;1489392;1491398;1492245;1492598;1492857;1493696;1494038;1495690;1496309;1496976;1497256;1501156;1501406;1513610;1513882;1515532;1515846;1516261;1517521	+;+;+;+;+;+;+;+;+;+;+;+;+;+;+;+;+;+;+;+;+;+;+;+;+;+;+;+;+;+;+;+;+;+;+;+;+;+	5660	900	1441	541	910	840	1150	753	782	1040	1101	1117	691	928	887	1041	669	951	765	621	693	742	813	774	882	881	849	850	602	405	764
ENSONIG00000021513	GL831133.1	1439904	1440007	+	104	16	32	8	8	7	4	11	8	9	20	13	6	5	6	3	4	4	3	4	4	7	44	33	61	3	6	12	3	10	21
ENSONIG00000022271	GL831133.1	1475630	1475735	+	106	1	1	0	0	0	0	3	0	1	0	1	2	1	0	1	0	0	0	0	0	0	3	2	9	0	1	1	0	0	2
ENSONIG00000002637	GL831133.1;GL831133.1;GL831133.1;GL831133.1	1531799;1532741;1534872;1536652	1532435;1532854;1535330;1537244	-;-;-;-	1803	541	868	376	612	588	966	545	869	677	543	738	602	827	881	923	603	726	523	467	553	668	574	740	631	715	599	427	463	271	537
ENSONIG00000002638	GL831133.1;GL831133.1;GL831133.1;GL831133.1;GL831133.1;GL831133.1;GL831133.1;GL831133.1;GL831133.1;GL831133.1;GL831133.1;GL831133.1;GL831133.1	1540946;1543331;1543782;1545427;1546014;1546316;1549027;1549265;1550486;1550701;1552307;1557240;1558152	1542181;1543497;1543878;1545475;1546105;1546459;1549159;1549341;1550527;1550837;1552418;1557389;1558284	-;-;-;-;-;-;-;-;-;-;-;-;-	2569	213	276	199	353	213	377	195	269	305	235	322	186	321	321	511	277	294	152	152	165	208	317	258	230	543	184	166	173	156	263
ENSONIG00000002644	GL831133.1;GL831133.1;GL831133.1;GL831133.1;GL831133.1;GL831133.1;GL831133.1;GL831133.1;GL831133.1;GL831133.1;GL831133.1;GL831133.1;GL831133.1;GL831133.1;GL831133.1;GL831133.1;GL831133.1;GL831133.1;GL831133.1;GL831133.1;GL831133.1;GL831133.1;GL831133.1;GL831133.1;GL831133.1;GL831133.1;GL831133.1;GL831133.1;GL831133.1;GL831133.1;GL831133.1;GL831133.1;GL831133.1;GL831133.1;GL831133.1;GL831133.1;GL8…	1559710;1563435;1564629;1564629;1564837;1564837;1565086;1565086;1565880;1565880;1566341;1566341;1566585;1566585;1566852;1566852;1567097;1567097;1567650;1568347;1568347;1570154;1573935;1574160;1574160;1576528;1576528;1576889;1576889;1577095;1577187;1577187;1577564;1577564;1577920;1577920;1578168;1578168;1579304;1579304;1579667;1579667;1580073;1580073;1580315;1580315;1580650;1580650;1581426;1581426…	1563587;1563587;1564709;1564709;1565011;1565011;1565368;1565368;1566030;1566030;1566430;1566430;1566739;1566739;1567001;1567001;1567190;1567190;1567715;1568545;1568545;1570234;1573991;1574257;1574257;1576755;1576755;1576930;1576924;1577109;1577321;1577321;1577677;1577677;1578068;1578068;1578261;1578261;1579552;1579552;1579906;1579906;1580229;1580229;1580526;1580526;1580758;1580758;1581512;1581512…	-;-;-;-;-;-;-;-;-;-;-;-;-;-;-;-;-;-;-;-;-;-;-;-;-;-;-;-;-;-;-;-;-;-;-;-;-;-;-;-;-;-;-;-;-;-;-;-;-;-;-;-;-;-;-;-;-;-;-;-;-;-;-;-;-;-;-;-;-;-;-;-;-;-;-;-;-;-;-;-;-;-;-;-;-;-;-	9749	7378	12268	5238	9258	10323	14495	7471	9951	8899	9277	10322	7372	9613	10816	10422	9412	9971	7147	6537	7245	7579	9127	11148	9304	8519	7668	7803	6588	4510	7271
ENSONIG00000002656	GL831133.1;GL831133.1;GL831133.1;GL831133.1;GL831133.1;GL831133.1;GL831133.1;GL831133.1;GL831133.1;GL831133.1;GL831133.1;GL831133.1;GL831133.1;GL831133.1	1634462;1634746;1635342;1635531;1635981;1637138;1637798;1638151;1638652;1639081;1640277;1640728;1641512;1644084	1634615;1634945;1635410;1635689;1636077;1637226;1637914;1638525;1639005;1640032;1640403;1640752;1641694;1644269	-;-;-;-;-;-;-;-;-;-;-;-;-;-	3087	1184	1806	690	1469	1513	2078	955	1413	1368	1533	1461	749	1270	1453	1311	1426	1493	1167	758	1009	858	1235	1606	1411	947	1338	1065	1040	745	1148
ENSONIG00000002661	GL831133.1;GL831133.1	1675254;1680190	1675543;1681852	-;-	1953	36	146	65	71	102	103	63	65	99	91	43	52	82	106	117	31	95	57	58	36	39	85	84	91	54	41	68	54	48	77
ENSONIG00000002663	GL831133.1;GL831133.1;GL831133.1;GL831133.1;GL831133.1;GL831133.1;GL831133.1;GL831133.1;GL831133.1;GL831133.1;GL831133.1;GL831133.1;GL831133.1;GL831133.1;GL831133.1;GL831133.1;GL831133.1;GL831133.1;GL831133.1;GL831133.1;GL831133.1;GL831133.1;GL831133.1;GL831133.1;GL831133.1;GL831133.1;GL831133.1;GL831133.1;GL831133.1;GL831133.1;GL831133.1;GL831133.1;GL831133.1;GL831133.1	1851783;1854796;1855702;1857954;1861861;1866786;1869278;1869518;1873567;1875321;1879042;1881821;1885047;1885369;1890778;1891342;1898618;1899485;1905992;1908133;1924110;1926218;1927494;1927882;1929504;1933383;1933812;1934829;1935444;1937527;1942173;1945097;1946860;1948976	1853937;1855443;1855863;1858012;1861892;1866864;1869283;1869589;1873786;1875548;1879183;1881990;1885162;1885532;1890934;1891410;1898707;1899613;1906125;1908218;1924236;1926314;1927637;1927959;1929581;1933471;1933949;1934952;1935503;1937607;1942320;1945189;1947019;1949261	+;+;+;+;+;+;+;+;+;+;+;+;+;+;+;+;+;+;+;+;+;+;+;+;+;+;+;+;+;+;+;+;+;+	6621	1115	2393	854	1397	1240	2022	1081	1467	1192	1614	1396	962	1426	1531	1256	886	1238	1098	833	976	1054	1334	1469	1497	951	1188	1145	902	569	1184
ENSONIG00000002671	GL831133.1;GL831133.1;GL831133.1;GL831133.1;GL831133.1;GL831133.1;GL831133.1;GL831133.1;GL831133.1;GL831133.1;GL831133.1;GL831133.1;GL831133.1;GL831133.1;GL831133.1;GL831133.1;GL831133.1;GL831133.1;GL831133.1;GL831133.1;GL831133.1;GL831133.1;GL831133.1;GL831133.1;GL831133.1;GL831133.1;GL831133.1;GL831133.1;GL831133.1;GL831133.1;GL831133.1;GL831133.1;GL831133.1;GL831133.1;GL831133.1;GL831133.1;GL8…	1991212;1992459;1992814;1993097;1993119;1993307;1993361;1994509;1994509;1994772;1994772;1996909;1996909;1998489;1998489;1998833;1998867;1999367;1999367;2000520;2000520;2001268;2001268;2001829;2001829;2002078;2002078;2004144;2004144;2005126;2005126;2012482;2012482;2013937;2013937;2019334;2019334;2040781	1991730;1992587;1992994;1993221;1993221;1993311;1993412;1994643;1994643;1994942;1994942;1997036;1997036;1998682;1998675;1998931;1998931;1999579;1999579;2000696;2000696;2001408;2001405;2001993;2001993;2002488;2002488;2004296;2004296;2005266;2005260;2012618;2012615;2014078;2014078;2019577;2019648;2041263	-;-;-;-;-;-;-;-;-;-;-;-;-;-;-;-;-;-;-;-;-;-;-;-;-;-;-;-;-;-;-;-;-;-;-;-;-;-	4216	96	266	99	118	132	220	120	176	168	167	195	118	110	195	226	132	213	108	101	114	153	187	216	134	49	123	115	94	90	105
ENSONIG00000002676	GL831133.1;GL831133.1;GL831133.1;GL831133.1;GL831133.1;GL831133.1;GL831133.1;GL831133.1;GL831133.1;GL831133.1;GL831133.1;GL831133.1;GL831133.1	2049230;2049870;2050310;2050470;2050470;2052614;2052614;2053725;2053725;2055512;2055512;2055991;2055991	2049882;2049882;2050372;2050589;2050589;2052770;2052770;2053826;2053826;2055629;2055629;2056170;2058827	+;+;+;+;+;+;+;+;+;+;+;+;+	4050	18	44	16	19	19	60	31	16	8	41	23	0	21	29	18	62	17	19	8	11	12	11	5	40	9	17	28	2	8	19
ENSONIG00000002678	GL831133.1;GL831133.1;GL831133.1;GL831133.1;GL831133.1;GL831133.1;GL831133.1	2073701;2074228;2074698;2079133;2080516;2084909;2086098	2073820;2074323;2074854;2079270;2080625;2085949;2086142	-;-;-;-;-;-;-	1707	73	183	96	107	105	204	158	144	145	141	154	108	158	176	151	104	222	121	97	142	157	174	132	114	161	111	75	103	38	85
ENSONIG00000026538	GL831133.1;GL831133.1	2197491;2199433	2197865;2199532	-;-	475	0	2	0	0	0	0	0	5	0	0	0	0	1	0	1	0	0	0	0	1	0	1	4	2	0	4	0	0	0	5
ENSONIG00000002681	GL831133.1;GL831133.1;GL831133.1	2244485;2244809;2245120	2244736;2245068;2245312	+;+;+	705	293	524	299	383	414	775	271	562	470	371	478	226	407	451	560	294	566	420	352	428	298	416	428	382	765	498	351	378	192	310
ENSONIG00000002682	GL831133.1;GL831133.1;GL831133.1;GL831133.1;GL831133.1;GL831133.1;GL831133.1	2345517;2345610;2347261;2349315;2374979;2376734;2377209	2345527;2345654;2347278;2349452;2375275;2377084;2377251	-;-;-;-;-;-;-	903	171	170	117	159	157	246	127	191	159	156	199	135	171	203	191	163	205	189	119	131	170	175	200	155	268	202	113	128	89	119
ENSONIG00000002684	GL831133.1;GL831133.1;GL831133.1;GL831133.1;GL831133.1;GL831133.1;GL831133.1;GL831133.1;GL831133.1;GL831133.1;GL831133.1	2396705;2397201;2397491;2397704;2400214;2400387;2400532;2400836;2400997;2401362;2401649	2396799;2397402;2397610;2397789;2400298;2400444;2400665;2400885;2401173;2401475;2401789	+;+;+;+;+;+;+;+;+;+;+	1262	407	527	318	333	365	426	280	451	455	335	292	237	327	432	509	360	434	343	218	266	295	352	455	310	532	355	329	298	150	322
ENSONIG00000023324	GL831133.1;GL831133.1	2407431;2412283	2407650;2412468	-;-	406	0	0	0	0	0	0	0	1	0	0	0	0	1	0	0	0	0	0	0	0	0	0	0	1	0	2	0	0	0	1
ENSONIG00000002690	GL831133.1;GL831133.1;GL831133.1;GL831133.1;GL831133.1;GL831133.1;GL831133.1;GL831133.1;GL831133.1;GL831133.1;GL831133.1;GL831133.1;GL831133.1;GL831133.1;GL831133.1;GL831133.1;GL831133.1;GL831133.1;GL831133.1;GL831133.1	2418234;2418234;2418234;2446598;2446598;2446598;2446822;2446822;2446822;2461122;2462051;2462051;2462051;2462636;2513753;2513753;2518632;2523252;2528144;2528149	2421789;2421789;2421789;2446717;2446717;2446717;2446996;2446996;2446996;2461214;2462278;2462269;2462269;2462648;2513885;2513885;2518642;2523278;2528584;2528584	-;-;-;-;-;-;-;-;-;-;-;-;-;-;-;-;-;-;-;-	4797	2339	3681	1682	2236	2111	3015	1686	2686	2374	2682	2002	1643	2146	2756	2528	2028	2446	2223	1726	2158	1649	2046	2417	1961	2411	1846	2036	2037	1018	1726
ENSONIG00000002694	GL831133.1;GL831133.1;GL831133.1;GL831133.1;GL831133.1;GL831133.1;GL831133.1;GL831133.1;GL831133.1;GL831133.1;GL831133.1;GL831133.1;GL831133.1	2578010;2582053;2583675;2583918;2584095;2584250;2584462;2585041;2585533;2586848;2587223;2589186;2589672	2581377;2582119;2583770;2583966;2584153;2584340;2584522;2585125;2585673;2586901;2587345;2589290;2589855	-;-;-;-;-;-;-;-;-;-;-;-;-	4483	3564	4422	2747	3247	3401	4917	2408	3651	3427	3844	3833	1970	3584	3761	4127	2839	3866	3044	2454	3237	2797	3017	3909	2812	4161	3320	2623	2676	1622	2938
ENSONIG00000002699	GL831133.1;GL831133.1;GL831133.1;GL831133.1;GL831133.1;GL831133.1;GL831133.1;GL831133.1;GL831133.1;GL831133.1;GL831133.1;GL831133.1;GL831133.1	2622678;2623414;2624385;2624460;2624731;2624731;2625321;2625321;2626212;2628562;2628562;2628930;2629325	2622747;2623559;2624504;2624504;2624840;2624840;2626118;2626374;2626374;2628804;2628676;2628964;2629342	+;+;+;+;+;+;+;+;+;+;+;+;+	1796	101	112	92	57	56	113	74	126	188	86	47	85	134	86	159	83	160	121	65	75	74	120	150	67	92	112	81	94	14	32
ENSONIG00000002702	GL831133.1;GL831133.1;GL831133.1;GL831133.1;GL831133.1;GL831133.1;GL831133.1	2631356;2631614;2632181;2634252;2635672;2636100;2637410	2631394;2631739;2632320;2634296;2635781;2637300;2639323	+;+;+;+;+;+;+	3575	580	770	314	588	562	1210	623	1012	584	647	702	506	548	650	955	503	494	843	217	346	521	485	745	683	784	960	382	709	294	486
ENSONIG00000020598	GL831133.1	2658887	2660494	-	1608	1	4	6	8	15	3	1	1	5	9	0	6	5	2	23	7	13	3	1	2	3	6	4	12	2	17	12	2	4	4
ENSONIG00000002709	GL831133.1;GL831133.1;GL831133.1;GL831133.1;GL831133.1;GL831133.1;GL831133.1;GL831133.1	2663594;2663917;2664699;2665112;2667060;2667329;2669955;2670425	2663752;2664612;2664876;2665221;2667104;2667480;2670089;2670959	-;-;-;-;-;-;-;-	2010	518	831	346	657	597	883	359	521	523	721	677	244	455	675	823	555	716	532	380	499	444	342	554	476	754	420	417	314	331	505
ENSONIG00000002713	GL831133.1;GL831133.1;GL831133.1	2671580;2672947;2679448	2672006;2673051;2680287	+;+;+	1372	27	33	12	17	35	38	14	25	18	24	30	25	17	37	52	40	39	24	19	8	45	24	20	15	19	14	28	21	10	16
ENSONIG00000020599	GL831133.1	2685395	2686354	+	960	13	18	12	20	17	25	9	15	22	11	7	10	15	17	23	7	18	12	12	9	19	17	21	3	20	26	16	10	9	8
ENSONIG00000020600	GL831133.1	2690780	2691655	+	876	1	2	0	0	0	1	0	0	0	5	1	1	0	0	1	1	0	0	0	0	0	0	1	4	0	0	0	0	0	2
ENSONIG00000020601	GL831133.1	2696384	2697967	+	1584	127	145	80	114	123	192	58	182	163	136	133	97	150	152	181	106	131	76	47	107	101	93	137	69	155	148	52	133	39	122
ENSONIG00000002715	GL831133.1;GL831133.1;GL831133.1;GL831133.1;GL831133.1;GL831133.1;GL831133.1	2715970;2720700;2721936;2724884;2725355;2730776;2730906	2716318;2720874;2722030;2725017;2725628;2730797;2730966	+;+;+;+;+;+;+	1110	2281	2963	1585	1949	1987	2846	1582	2356	2305	2144	1812	1275	2062	2144	2382	1873	2342	1946	1563	1837	1818	1914	2029	1709	2442	1862	1559	1675	931	1724
ENSONIG00000002721	GL831133.1;GL831133.1;GL831133.1;GL831133.1;GL831133.1;GL831133.1;GL831133.1;GL831133.1;GL831133.1;GL831133.1;GL831133.1;GL831133.1;GL831133.1;GL831133.1;GL831133.1	2732574;2732574;2732939;2732953;2733603;2733653;2733963;2734070;2734070;2734573;2734573;2737352;2737352;2739998;2739998	2732738;2732718;2733040;2733018;2733622;2733668;2733991;2734252;2734252;2734656;2734656;2737441;2737441;2740063;2740063	-;-;-;-;-;-;-;-;-;-;-;-;-;-;-	755	11	11	4	3	12	1	1	11	19	9	2	2	9	11	11	9	13	1	0	3	10	5	9	9	0	10	2	4	4	2
ENSONIG00000002723	GL831133.1;GL831133.1;GL831133.1;GL831133.1;GL831133.1;GL831133.1;GL831133.1;GL831133.1;GL831133.1;GL831133.1	2744214;2760840;2773445;2776985;2788285;2788762;2800714;2803105;2804227;2804664	2744905;2761263;2773606;2777203;2788431;2789002;2800878;2803683;2804297;2805458	+;+;+;+;+;+;+;+;+;+	3495	66	92	24	51	30	76	38	41	89	94	38	39	84	75	110	14	74	46	18	41	48	90	88	94	83	38	101	47	25	56
ENSONIG00000002725	GL831133.1;GL831133.1;GL831133.1;GL831133.1;GL831133.1;GL831133.1;GL831133.1;GL831133.1;GL831133.1;GL831133.1;GL831133.1;GL831133.1;GL831133.1;GL831133.1;GL831133.1;GL831133.1;GL831133.1;GL831133.1;GL831133.1;GL831133.1	2841629;2846621;2846842;2846842;2848897;2849468;2851132;2851132;2851431;2851431;2851806;2851806;2852182;2852182;2852468;2852468;2854475;2854475;2854926;2854926	2846727;2846727;2847023;2847023;2849063;2849634;2851284;2851284;2851581;2851581;2852076;2852076;2852368;2852368;2852599;2852599;2854566;2854566;2855082;2855107	-;-;-;-;-;-;-;-;-;-;-;-;-;-;-;-;-;-;-;-	6783	11913	17536	8955	12674	13514	19851	10422	15194	13906	12618	14839	9062	13995	14647	17129	12643	15727	12892	10220	11600	11203	12570	14408	13052	15592	12338	10218	10618	6358	10647
ENSONIG00000002735	GL831133.1;GL831133.1;GL831133.1;GL831133.1;GL831133.1;GL831133.1;GL831133.1	2841939;2842882;2843134;2843540;2844335;2844617;2844943	2842196;2842993;2843297;2843795;2844459;2844767;2846585	+;+;+;+;+;+;+	2709	0	0	0	0	0	0	0	0	0	0	0	0	0	0	0	0	0	0	0	0	0	0	0	0	0	0	0	0	0	0
ENSONIG00000002740	GL831133.1;GL831133.1;GL831133.1;GL831133.1;GL831133.1;GL831133.1;GL831133.1;GL831133.1;GL831133.1;GL831133.1;GL831133.1;GL831133.1;GL831133.1;GL831133.1;GL831133.1;GL831133.1;GL831133.1;GL831133.1;GL831133.1;GL831133.1;GL831133.1;GL831133.1;GL831133.1;GL831133.1;GL831133.1;GL831133.1;GL831133.1;GL831133.1;GL831133.1;GL831133.1;GL831133.1;GL831133.1;GL831133.1;GL831133.1;GL831133.1;GL831133.1;GL8…	2864403;2865869;2866458;2866461;2868173;2868188;2868526;2868526;2868753;2868753;2869027;2869027;2869296;2869296;2870577;2870577;2871064;2871169;2871242;2871703;2871703;2872037;2872037;2872369;2872369;2872780;2872780;2873236;2873236;2873542;2873542;2873728;2873728;2875387;2875387;2877152;2877158;2878023;2878023;2878393;2878393;2878922;2878922;2880042;2880042	2864496;2865941;2866538;2866538;2868282;2868282;2868586;2868586;2868843;2868843;2869093;2869093;2869445;2869445;2870759;2870727;2871089;2871300;2871300;2871798;2871798;2872129;2872129;2872494;2872494;2872845;2872845;2873303;2873303;2873590;2873590;2873840;2873840;2875459;2875459;2877227;2877227;2878102;2878102;2878456;2878456;2879006;2879006;2880144;2880144	+;+;+;+;+;+;+;+;+;+;+;+;+;+;+;+;+;+;+;+;+;+;+;+;+;+;+;+;+;+;+;+;+;+;+;+;+;+;+;+;+;+;+;+;+	2160	4249	5978	3151	4145	4678	6556	3146	5225	4627	4585	4271	2649	3859	4611	4560	4387	4468	3987	3471	3900	3445	4490	4649	3796	5376	4167	3880	3343	2212	3951
ENSONIG00000024284	GL831133.1;GL831133.1;GL831133.1	2882504;2896002;2896485	2882555;2896305;2897151	+;+;+	1023	2	9	6	28	1	12	2	0	0	4	6	2	0	5	0	0	0	3	0	3	1	0	1	3	14	0	3	2	4	0
ENSONIG00000002755	GL831133.1;GL831133.1;GL831133.1;GL831133.1;GL831133.1;GL831133.1;GL831133.1;GL831133.1;GL831133.1;GL831133.1;GL831133.1;GL831133.1;GL831133.1;GL831133.1;GL831133.1;GL831133.1;GL831133.1;GL831133.1;GL831133.1;GL831133.1;GL831133.1;GL831133.1	2916748;2926902;3007391;3022088;3022089;3026028;3026028;3035077;3035077;3036136;3036136;3039036;3039036;3039639;3040299;3040329;3040958;3040958;3044926;3044932;3049159;3049159	2917081;2926984;3007439;3022217;3022217;3026107;3026107;3035220;3035250;3036283;3036283;3039185;3039185;3039713;3040391;3040391;3041038;3041038;3045075;3045075;3049286;3049308	+;+;+;+;+;+;+;+;+;+;+;+;+;+;+;+;+;+;+;+;+;+	1697	1120	1922	575	1266	1344	2005	1007	1381	944	1426	1369	766	1343	1589	1499	1224	1644	1107	530	580	651	855	1552	1381	1665	1231	1471	1093	606	1108
ENSONIG00000002759	GL831133.1;GL831133.1	3104001;3104186	3104152;3104507	+;+	474	122	179	91	161	151	173	85	130	145	156	151	100	148	151	170	125	148	94	71	118	108	94	104	122	174	134	98	107	84	115
ENSONIG00000002760	GL831133.1;GL831133.1;GL831133.1;GL831133.1;GL831133.1;GL831133.1;GL831133.1;GL831133.1;GL831133.1;GL831133.1;GL831133.1;GL831133.1;GL831133.1;GL831133.1;GL831133.1;GL831133.1;GL831133.1;GL831133.1;GL831133.1;GL831133.1;GL831133.1;GL831133.1	3114294;3114771;3115059;3115135;3115341;3115341;3115581;3115581;3117143;3117143;3117776;3117776;3118458;3118458;3119661;3119661;3119837;3119837;3120950;3120950;3121194;3121194	3114626;3114787;3115242;3115242;3115467;3115467;3115710;3115710;3117293;3117293;3117845;3117845;3118634;3118634;3119745;3119745;3119912;3119912;3121085;3121085;3121370;3126204	+;+;+;+;+;+;+;+;+;+;+;+;+;+;+;+;+;+;+;+;+;+	6497	402	587	405	442	411	560	301	630	457	465	511	261	591	518	615	363	458	422	349	414	432	437	429	386	611	421	288	301	220	478
ENSONIG00000002766	GL831133.1;GL831133.1;GL831133.1;GL831133.1;GL831133.1;GL831133.1;GL831133.1;GL831133.1;GL831133.1;GL831133.1;GL831133.1;GL831133.1;GL831133.1;GL831133.1;GL831133.1;GL831133.1;GL831133.1;GL831133.1;GL831133.1;GL831133.1;GL831133.1;GL831133.1;GL831133.1;GL831133.1	3123434;3123624;3123933;3124248;3124698;3125083;3125522;3126392;3127535;3127828;3128086;3128396;3128838;3129145;3129325;3129891;3130320;3130683;3131084;3131525;3131954;3132441;3132660;3140357	3123525;3123757;3124120;3124355;3124829;3125258;3125717;3126560;3127651;3127947;3128184;3128514;3129012;3129202;3129423;3130055;3130534;3130924;3131214;3131579;3132100;3132572;3132757;3140851	-;-;-;-;-;-;-;-;-;-;-;-;-;-;-;-;-;-;-;-;-;-;-;-	3662	284	475	328	419	342	434	277	449	343	378	480	305	374	346	481	402	390	357	290	302	335	309	390	361	419	384	251	239	166	295
ENSONIG00000002785	GL831133.1;GL831133.1;GL831133.1;GL831133.1;GL831133.1;GL831133.1;GL831133.1;GL831133.1;GL831133.1;GL831133.1;GL831133.1;GL831133.1;GL831133.1;GL831133.1;GL831133.1;GL831133.1;GL831133.1;GL831133.1;GL831133.1;GL831133.1;GL831133.1;GL831133.1;GL831133.1;GL831133.1;GL831133.1;GL831133.1;GL831133.1;GL831133.1;GL831133.1;GL831133.1	3155948;3157991;3158296;3158296;3159551;3159551;3161412;3161412;3164064;3164064;3164821;3164821;3168114;3168114;3168425;3168425;3169909;3169909;3170635;3170635;3170943;3170943;3177654;3177654;3179982;3179982;3181173;3181173;3181324;3182072	3158014;3158014;3158367;3158367;3159718;3159718;3161512;3161512;3164163;3164163;3164949;3164949;3168226;3168226;3168549;3168549;3170012;3170012;3170769;3170769;3171081;3171081;3177882;3177882;3180113;3180113;3181287;3181650;3181485;3182186	-;-;-;-;-;-;-;-;-;-;-;-;-;-;-;-;-;-;-;-;-;-;-;-;-;-;-;-;-;-	4207	501	650	497	500	447	620	452	1097	835	607	466	479	884	719	898	510	729	855	369	557	526	735	776	617	1044	869	567	644	215	510
ENSONIG00000002790	GL831133.1;GL831133.1;GL831133.1;GL831133.1;GL831133.1;GL831133.1;GL831133.1;GL831133.1;GL831133.1;GL831133.1;GL831133.1;GL831133.1;GL831133.1;GL831133.1	3188446;3188807;3189690;3190789;3191072;3191596;3191867;3192139;3192616;3192957;3193188;3193846;3195683;3196201	3188624;3188948;3189788;3190942;3191197;3191678;3191921;3192173;3192674;3193017;3193300;3194063;3195825;3196335	-;-;-;-;-;-;-;-;-;-;-;-;-;-	1602	845	1301	786	765	743	1168	745	1254	1190	844	759	683	944	1091	1200	641	1169	744	869	761	833	959	950	820	949	807	750	911	382	763
ENSONIG00000002793	GL831133.1;GL831133.1;GL831133.1;GL831133.1;GL831133.1;GL831133.1;GL831133.1;GL831133.1;GL831133.1;GL831133.1;GL831133.1;GL831133.1;GL831133.1	3198160;3199706;3200754;3201441;3205080;3205327;3205634;3206608;3207484;3208426;3209213;3210127;3210550	3198263;3199815;3200913;3201574;3205206;3205482;3205807;3206781;3207657;3208554;3209361;3210353;3210813	-;-;-;-;-;-;-;-;-;-;-;-;-	2082	422	631	269	477	463	582	345	730	395	391	493	340	437	711	674	337	550	453	348	270	337	436	509	390	729	494	413	286	178	434
ENSONIG00000002803	GL831133.1;GL831133.1;GL831133.1;GL831133.1;GL831133.1;GL831133.1;GL831133.1	3257911;3259808;3260152;3260988;3261493;3262340;3263710	3259440;3259919;3260829;3261259;3261602;3262615;3264418	-;-;-;-;-;-;-	3687	4	14	9	42	27	40	12	33	5	8	12	5	11	25	27	9	12	20	10	17	0	18	16	11	30	8	14	20	7	8
ENSONIG00000002806	GL831133.1;GL831133.1;GL831133.1	3399574;3400926;3402273	3400280;3401331;3402515	-;-;-	1356	57	106	80	105	38	75	45	64	74	64	25	51	62	81	99	72	115	68	38	50	70	92	73	67	60	40	53	29	57	39
ENSONIG00000025539	GL831133.1;GL831133.1	3460658;3494050	3461704;3494148	-;-	1146	0	0	0	0	0	0	0	0	0	0	0	0	0	0	0	0	0	0	0	0	0	0	0	0	0	0	0	0	0	0
ENSONIG00000026018	GL831133.1;GL831133.1	3481939;3484485	3482255;3484637	+;+	470	0	0	0	0	0	0	0	0	0	0	0	0	5	0	0	0	0	0	0	0	0	0	0	0	0	0	0	0	0	0
ENSONIG00000023405	GL831133.1;GL831133.1	3569903;3571157	3570044;3571270	+;+	256	0	0	0	0	0	0	0	0	0	0	0	0	0	0	0	0	0	0	0	0	0	0	0	0	0	0	0	0	0	0
ENSONIG00000002808	GL831133.1;GL831133.1;GL831133.1	3597636;3598416;3599926	3597854;3599445;3599999	+;+;+	1323	50	49	40	104	30	72	61	44	88	38	50	21	34	52	92	28	60	67	26	25	45	46	76	46	81	57	30	53	35	36
ENSONIG00000025009	GL831133.1;GL831133.1	3631676;3636774	3632011;3637000	-;-	563	6	9	3	1	10	0	1	4	5	4	1	3	3	2	2	0	1	2	2	3	6	13	11	8	0	4	3	3	3	0
ENSONIG00000002809	GL831133.1;GL831133.1;GL831133.1;GL831133.1;GL831133.1;GL831133.1;GL831133.1;GL831133.1	3717211;3723513;3725379;3729072;3731744;3732380;3732982;3733188	3717348;3723656;3725458;3729197;3731998;3732779;3733064;3733227	-;-;-;-;-;-;-;-	1266	486	763	391	533	522	734	401	608	474	661	527	336	482	524	711	489	595	476	358	336	413	504	505	508	473	458	458	412	258	433
ENSONIG00000002813	GL831133.1;GL831133.1;GL831133.1;GL831133.1;GL831133.1;GL831133.1;GL831133.1;GL831133.1;GL831133.1;GL831133.1	3821978;3822812;3824476;3824877;3825050;3825348;3826557;3826901;3827142;3827316	3822125;3822936;3824687;3824941;3825150;3825436;3826655;3827008;3827202;3828839	+;+;+;+;+;+;+;+;+;+	2532	1309	2125	538	2080	1883	2783	916	2026	777	1700	1914	447	1444	1373	1813	1955	705	1120	501	1169	465	726	1398	618	1684	1364	867	1077	983	1236
ENSONIG00000002816	GL831133.1;GL831133.1;GL831133.1;GL831133.1;GL831133.1;GL831133.1;GL831133.1;GL831133.1;GL831133.1;GL831133.1;GL831133.1;GL831133.1;GL831133.1;GL831133.1;GL831133.1;GL831133.1;GL831133.1;GL831133.1;GL831133.1;GL831133.1;GL831133.1;GL831133.1;GL831133.1;GL831133.1;GL831133.1;GL831133.1;GL831133.1;GL831133.1;GL831133.1;GL831133.1;GL831133.1;GL831133.1;GL831133.1;GL831133.1;GL831133.1;GL831133.1;GL8…	3829277;3832534;3857181;3857253;3867088;3867088;3867205;3869110;3869110;3870394;3870394;3870655;3870655;3871289;3871289;3871776;3871776;3872102;3872102;3873439;3873439;3875775;3875775;3877679;3877679;3877966;3877966;3879518;3879518;3880054;3880054;3881269;3881269;3881789;3881789;3882905;3882905;3883296;3883296;3883550;3883550;3884054;3884054;3884362;3884362;3887108;3887108;3888077;3888077;3888500…	3829383;3834181;3857593;3857593;3867193;3867193;3867210;3869256;3869256;3870462;3870462;3870710;3870710;3871406;3871406;3871862;3871862;3872239;3872239;3873560;3873560;3876018;3876018;3877855;3877855;3878109;3878109;3879773;3879773;3880264;3880264;3881464;3881464;3881971;3881971;3883090;3883090;3883406;3883406;3883749;3883749;3884253;3884253;3884521;3884521;3887197;3887197;3888180;3888180;3888617…	+;+;+;+;+;+;+;+;+;+;+;+;+;+;+;+;+;+;+;+;+;+;+;+;+;+;+;+;+;+;+;+;+;+;+;+;+;+;+;+;+;+;+;+;+;+;+;+;+;+;+;+;+;+;+;+;+;+;+;+;+;+;+;+;+;+;+;+;+;+;+;+;+;+;+	9165	1094	1695	821	1263	1353	1793	1110	1232	1184	1547	1184	962	1608	1582	1621	1220	1051	1152	837	933	1166	1304	1389	1693	1053	981	1076	996	684	894
ENSONIG00000023098	GL831133.1;GL831133.1;GL831133.1	4014398;4015923;4047404	4015348;4016083;4047547	-;-;-	1256	5	5	0	4	0	0	0	2	0	0	4	0	0	4	6	0	0	0	5	5	1	0	2	4	3	0	10	1	4	1
ENSONIG00000002828	GL831133.1;GL831133.1;GL831133.1;GL831133.1;GL831133.1;GL831133.1;GL831133.1;GL831133.1;GL831133.1;GL831133.1;GL831133.1;GL831133.1;GL831133.1;GL831133.1;GL831133.1	4050294;4070606;4071488;4071488;4077950;4077950;4084460;4084460;4084839;4084839;4085157;4085157;4085468;4085468;4086251	4051136;4070683;4071553;4071553;4078201;4078201;4084723;4084723;4085069;4085069;4085237;4085237;4085791;4088253;4086313	+;+;+;+;+;+;+;+;+;+;+;+;+;+;+	4601	853	1313	527	989	1057	1259	733	936	961	819	1022	647	1007	1179	1548	865	972	807	675	587	601	815	1021	960	1480	723	944	891	423	817
ENSONIG00000023644	GL831133.1;GL831133.1;GL831133.1	4155173;4163462;4181682	4155526;4163590;4181840	+;+;+	642	0	0	0	0	0	0	0	0	0	0	0	0	0	0	0	0	0	0	0	0	0	0	0	0	0	0	0	0	0	0
ENSONIG00000024774	GL831133.1;GL831133.1	4187580;4213702	4188257;4217587	+;+	4564	20	29	5	22	14	19	13	20	14	29	82	24	23	64	41	21	12	12	26	0	24	27	7	17	23	24	61	26	6	13
ENSONIG00000002831	GL831133.1;GL831133.1;GL831133.1;GL831133.1;GL831133.1	4295497;4296429;4301727;4301727;4306213	4296501;4296501;4305130;4309125;4306653	+;+;+;+;+	8404	660	1244	372	802	843	1476	620	1006	880	870	1121	765	987	1103	963	683	826	632	601	609	735	672	801	737	652	748	785	605	303	720
ENSONIG00000002832	GL831133.1;GL831133.1;GL831133.1;GL831133.1;GL831133.1;GL831133.1;GL831133.1;GL831133.1;GL831133.1;GL831133.1;GL831133.1;GL831133.1;GL831133.1;GL831133.1;GL831133.1;GL831133.1;GL831133.1	4393204;4393827;4394377;4394724;4395408;4397512;4397867;4398195;4399097;4399328;4399986;4403585;4405793;4406551;4408490;4410657;4412310	4393388;4394043;4394495;4394832;4395540;4397578;4397958;4398317;4399238;4399493;4400374;4403701;4405894;4406656;4408801;4411199;4412814	-;-;-;-;-;-;-;-;-;-;-;-;-;-;-;-;-	3427	1312	1901	834	1374	1338	2048	1273	1382	1589	1554	1651	998	1486	1540	1925	1278	1426	1305	1071	1113	1251	1442	1480	1441	1052	1206	1205	1134	734	1177
ENSONIG00000002837	GL831133.1;GL831133.1;GL831133.1;GL831133.1;GL831133.1;GL831133.1;GL831133.1;GL831133.1;GL831133.1;GL831133.1;GL831133.1	4416524;4417846;4418054;4418275;4418433;4418601;4418768;4419003;4421031;4421644;4422501	4417607;4417929;4418137;4418358;4418516;4418684;4418851;4420773;4421157;4422203;4422809	-;-;-;-;-;-;-;-;-;-;-	4355	30	105	61	42	27	112	24	28	42	48	58	72	9	39	103	40	64	21	17	36	42	113	76	53	34	30	17	32	41	40
ENSONIG00000002842	GL831133.1;GL831133.1;GL831133.1;GL831133.1;GL831133.1;GL831133.1;GL831133.1;GL831133.1;GL831133.1;GL831133.1	4430952;4437004;4437582;4438521;4440297;4440518;4445070;4463617;4463996;4464144	4436237;4437131;4437663;4438668;4440392;4440621;4445127;4463756;4464028;4464358	-;-;-;-;-;-;-;-;-;-	6290	470	622	545	700	647	931	368	585	424	741	452	409	761	739	821	645	711	344	304	478	375	417	777	525	362	462	491	466	344	344
ENSONIG00000002844	GL831133.1;GL831133.1;GL831133.1;GL831133.1;GL831133.1;GL831133.1;GL831133.1;GL831133.1;GL831133.1;GL831133.1;GL831133.1;GL831133.1;GL831133.1;GL831133.1;GL831133.1;GL831133.1;GL831133.1	4520955;4521392;4521709;4521890;4522117;4522750;4523965;4524874;4526336;4527057;4527256;4528529;4528756;4529471;4531068;4532745;4532980	4521003;4521585;4521802;4521947;4522261;4522860;4524134;4524988;4526411;4527164;4527391;4528640;4528803;4529552;4531211;4532885;4533041	+;+;+;+;+;+;+;+;+;+;+;+;+;+;+;+;+	1845	335	559	263	545	455	766	340	633	524	456	562	284	424	461	619	469	543	358	393	330	436	521	470	447	490	426	358	396	207	377
ENSONIG00000002854	GL831133.1;GL831133.1;GL831133.1;GL831133.1;GL831133.1;GL831133.1;GL831133.1;GL831133.1;GL831133.1;GL831133.1;GL831133.1;GL831133.1;GL831133.1;GL831133.1;GL831133.1;GL831133.1;GL831133.1;GL831133.1;GL831133.1;GL831133.1;GL831133.1;GL831133.1;GL831133.1;GL831133.1;GL831133.1;GL831133.1;GL831133.1;GL831133.1;GL831133.1	4534328;4534915;4538573;4539826;4540071;4541182;4541441;4541964;4542705;4542912;4543319;4543496;4545105;4545375;4545578;4545953;4547042;4547377;4551259;4551718;4552476;4552707;4553194;4554247;4556573;4559956;4560678;4562190;4566231	4534474;4535039;4538687;4539933;4540217;4541340;4541520;4542005;4542743;4543107;4543394;4543659;4545189;4545472;4545595;4545960;4547100;4547451;4551296;4551906;4552602;4552865;4553321;4554358;4556733;4560105;4560839;4562387;4566961	-;-;-;-;-;-;-;-;-;-;-;-;-;-;-;-;-;-;-;-;-;-;-;-;-;-;-;-;-	3896	1246	1958	746	1355	1260	2161	1063	1612	1199	1451	1198	715	1412	1366	1303	1215	1592	1168	1061	1104	972	1224	1417	1256	1828	1352	1361	1098	687	1170
ENSONIG00000002860	GL831133.1;GL831133.1;GL831133.1;GL831133.1;GL831133.1;GL831133.1;GL831133.1;GL831133.1;GL831133.1;GL831133.1;GL831133.1;GL831133.1	4600258;4602325;4602613;4602999;4603419;4603971;4604370;4604778;4605588;4606949;4610418;4622822	4600428;4602471;4602821;4603084;4603545;4604184;4604498;4604885;4605708;4606995;4610541;4623753	-;-;-;-;-;-;-;-;-;-;-;-	2415	391	828	347	618	703	707	413	447	398	508	747	563	651	553	693	531	435	408	216	320	576	586	615	700	237	381	518	373	235	311
ENSONIG00000002862	GL831133.1;GL831133.1;GL831133.1;GL831133.1;GL831133.1;GL831133.1;GL831133.1;GL831133.1;GL831133.1;GL831133.1;GL831133.1;GL831133.1;GL831133.1;GL831133.1;GL831133.1;GL831133.1;GL831133.1;GL831133.1;GL831133.1;GL831133.1;GL831133.1;GL831133.1;GL831133.1;GL831133.1;GL831133.1;GL831133.1;GL831133.1;GL831133.1;GL831133.1;GL831133.1;GL831133.1	4626394;4626844;4626848;4627144;4627144;4627388;4627388;4627922;4627922;4628151;4628151;4628400;4628400;4628774;4628774;4629134;4629134;4630594;4630594;4631033;4631033;4631436;4631436;4631886;4631886;4632305;4632305;4635448;4635448;4635893;4635893	4626403;4626957;4626957;4627320;4627320;4627531;4627531;4628010;4628010;4628287;4628287;4628482;4628482;4628928;4628928;4629224;4629224;4630886;4630886;4631173;4631173;4631545;4631545;4631986;4631986;4632392;4632392;4635620;4635620;4636226;4636033	-;-;-;-;-;-;-;-;-;-;-;-;-;-;-;-;-;-;-;-;-;-;-;-;-;-;-;-;-;-;-	2240	364	522	274	444	379	586	326	428	431	410	395	255	601	542	541	405	414	466	318	356	368	359	360	403	529	383	412	408	226	406
ENSONIG00000002867	GL831133.1;GL831133.1;GL831133.1;GL831133.1;GL831133.1;GL831133.1	4636636;4636769;4638020;4639046;4639273;4639916	4636677;4636823;4638129;4639119;4639344;4640009	-;-;-;-;-;-	447	209	382	162	270	240	392	217	308	251	236	389	235	307	304	469	340	270	268	170	196	254	303	310	294	466	249	140	207	161	195
ENSONIG00000020602	GL831133.1	4641057	4641722	-	666	0	2	0	0	0	0	0	2	0	0	0	0	2	0	0	0	0	0	0	0	0	0	0	0	0	0	0	0	0	0
ENSONIG00000020603	GL831133.1	4645449	4646321	-	873	62	102	40	67	77	130	74	72	59	48	73	83	81	90	126	83	63	93	43	52	71	106	55	67	64	113	54	51	32	44
ENSONIG00000002868	GL831133.1;GL831133.1	4649459;4650001	4649500;4650834	-;-	876	35	45	41	10	39	38	33	33	40	37	36	34	30	32	47	16	33	24	27	41	40	32	30	43	26	23	23	39	8	39
ENSONIG00000002869	GL831133.1;GL831133.1	4652723;4653054	4652799;4654743	+;+	1767	168	217	194	203	296	281	133	232	230	233	232	153	280	202	329	215	253	224	131	213	231	195	238	229	409	221	242	102	97	198
ENSONIG00000002870	GL831133.1;GL831133.1;GL831133.1;GL831133.1;GL831133.1;GL831133.1;GL831133.1;GL831133.1	4655044;4665746;4680569;4682445;4682998;4683774;4684400;4686981	4657063;4665847;4680636;4682507;4683128;4683825;4684468;4687133	+;+;+;+;+;+;+;+	2658	124	165	82	110	87	132	72	126	99	123	132	101	149	97	126	98	101	80	80	102	54	85	143	112	57	72	85	67	35	92
ENSONIG00000002874	GL831133.1;GL831133.1;GL831133.1;GL831133.1;GL831133.1;GL831133.1;GL831133.1;GL831133.1;GL831133.1;GL831133.1;GL831133.1;GL831133.1;GL831133.1;GL831133.1;GL831133.1;GL831133.1;GL831133.1;GL831133.1	4705311;4707019;4707577;4708989;4710663;4711445;4711688;4712004;4712289;4713105;4713241;4713375;4713559;4713799;4714049;4714377;4714667;4714966	4706571;4707085;4707652;4709117;4710739;4711574;4711840;4712047;4712349;4713158;4713285;4713446;4713705;4713882;4714168;4714445;4714757;4715207	-;-;-;-;-;-;-;-;-;-;-;-;-;-;-;-;-;-	2922	4	0	0	0	0	10	0	2	0	0	22	1	2	0	0	0	0	0	0	0	0	0	0	0	0	6	4	2	0	2
ENSONIG00000002881	GL831133.1;GL831133.1;GL831133.1;GL831133.1;GL831133.1;GL831133.1;GL831133.1;GL831133.1;GL831133.1;GL831133.1;GL831133.1;GL831133.1;GL831133.1;GL831133.1;GL831133.1;GL831133.1;GL831133.1;GL831133.1;GL831133.1;GL831133.1;GL831133.1;GL831133.1;GL831133.1;GL831133.1;GL831133.1;GL831133.1;GL831133.1;GL831133.1;GL831133.1	4731511;4731701;4731766;4740466;4740466;4741278;4741278;4741699;4741699;4742156;4742156;4742558;4742558;4746464;4746464;4749372;4749372;4749579;4749582;4750131;4750384;4751687;4751693;4754200;4754200;4754496;4754496;4755411;4755411	4731621;4732269;4732269;4740678;4740678;4741418;4741418;4741794;4741794;4742317;4742317;4742716;4742716;4746561;4746561;4749497;4749497;4750091;4750702;4750356;4750702;4751858;4751858;4754337;4754337;4754571;4754571;4755737;4758811	+;+;+;+;+;+;+;+;+;+;+;+;+;+;+;+;+;+;+;+;+;+;+;+;+;+;+;+;+	6586	1783	3141	1468	1927	2006	2309	1614	2112	2051	2095	2005	1235	2133	2478	2301	1513	2353	1847	1511	1575	1707	1861	1993	1879	2288	1560	1774	1476	862	1658
ENSONIG00000002884	GL831133.1;GL831133.1;GL831133.1;GL831133.1;GL831133.1;GL831133.1;GL831133.1;GL831133.1;GL831133.1	4767170;4771120;4772445;4772707;4773204;4773945;4774935;4775908;4776677	4770598;4771360;4772592;4772886;4773284;4774139;4775085;4776071;4777243	-;-;-;-;-;-;-;-;-	5156	2438	4185	1928	2859	3000	4099	2415	3776	2984	2778	3072	2113	3233	3247	4128	2616	3859	2865	2625	2555	2590	2783	2955	2659	2315	2740	2325	2554	1342	2524
ENSONIG00000002889	GL831133.1;GL831133.1;GL831133.1;GL831133.1;GL831133.1;GL831133.1;GL831133.1;GL831133.1;GL831133.1;GL831133.1;GL831133.1;GL831133.1;GL831133.1;GL831133.1;GL831133.1;GL831133.1;GL831133.1;GL831133.1;GL831133.1;GL831133.1;GL831133.1;GL831133.1;GL831133.1;GL831133.1;GL831133.1;GL831133.1;GL831133.1;GL831133.1;GL831133.1;GL831133.1;GL831133.1	4778871;4781844;4793122;4793672;4793908;4793929;4794557;4794557;4795752;4795752;4800337;4801524;4801586;4801740;4802023;4803041;4803764;4807813;4807956;4808128;4808168;4808190;4816625;4816625;4820889;4820889;4827157;4827157;4842945;4842945;4867466	4780449;4782016;4793274;4793689;4794030;4794030;4794646;4794646;4795972;4795961;4800412;4801638;4801657;4801752;4802115;4803053;4803915;4807873;4808116;4808146;4808359;4808359;4816755;4816755;4821014;4821014;4827213;4827213;4843040;4843067;4869823	+;+;+;+;+;+;+;+;+;+;+;+;+;+;+;+;+;+;+;+;+;+;+;+;+;+;+;+;+;+;+	6066	528	902	256	487	483	819	329	549	507	450	524	282	458	594	476	332	459	420	358	342	339	444	529	558	419	396	581	437	191	425
ENSONIG00000002890	GL831133.1;GL831133.1;GL831133.1;GL831133.1;GL831133.1	4870293;4882253;4887095;4893776;4896314	4873857;4882558;4887239;4893951;4896325	-;-;-;-;-	4204	1464	2714	967	1891	2045	2638	1158	1805	1457	1729	1904	925	1664	2263	2190	1738	1803	1287	1159	1198	1564	1662	1769	1466	2661	1481	1479	1119	718	1170
ENSONIG00000020604	GL831133.1	4923586	4924665	-	1080	654	1040	470	705	735	1088	623	693	762	666	512	458	704	780	580	598	540	677	545	611	367	546	747	695	748	561	546	515	342	504
ENSONIG00000002891	GL831133.1;GL831133.1;GL831133.1;GL831133.1;GL831133.1;GL831133.1;GL831133.1;GL831133.1;GL831133.1;GL831133.1;GL831133.1;GL831133.1;GL831133.1;GL831133.1;GL831133.1	5185952;5188098;5191101;5191919;5195146;5195541;5195960;5197186;5198583;5199445;5200203;5200571;5201137;5202088;5203060	5186082;5188281;5191228;5191982;5195193;5195602;5196004;5197261;5198629;5199513;5200280;5200719;5201321;5202279;5204064	+;+;+;+;+;+;+;+;+;+;+;+;+;+;+	2463	1112	1550	890	1299	1187	1871	1164	1650	1591	1138	1423	986	1332	1642	2083	1210	1727	1105	832	1017	1300	1354	1439	1119	1557	1408	1073	943	592	1100
ENSONIG00000022439	GL831133.1;GL831133.1	5216027;5217157	5216435;5218300	+;+	1553	0	6	1	0	0	0	0	0	4	2	0	0	0	0	6	0	0	0	0	0	1	2	0	0	0	0	4	0	0	10
ENSONIG00000002894	GL831133.1;GL831133.1;GL831133.1;GL831133.1;GL831133.1;GL831133.1;GL831133.1;GL831133.1;GL831133.1;GL831133.1;GL831133.1;GL831133.1;GL831133.1;GL831133.1;GL831133.1;GL831133.1;GL831133.1;GL831133.1;GL831133.1;GL831133.1	5249446;5249773;5250946;5251246;5252162;5252556;5253190;5253235;5253721;5254007;5254373;5257385;5283496;5286041;5287116;5288373;5289821;5290266;5291768;5292009	5249588;5249917;5251125;5251419;5252335;5252760;5253233;5253311;5253917;5254182;5254548;5257589;5283618;5286057;5287218;5288805;5289841;5290588;5291846;5292025	-;-;-;-;-;-;-;-;-;-;-;-;-;-;-;-;-;-;-;-	3012	6	19	7	6	8	27	14	10	15	4	4	22	10	6	15	9	16	7	18	11	8	0	15	16	25	16	12	7	12	3
ENSONIG00000002895	GL831133.1;GL831133.1;GL831133.1;GL831133.1;GL831133.1;GL831133.1;GL831133.1;GL831133.1;GL831133.1;GL831133.1;GL831133.1;GL831133.1;GL831133.1;GL831133.1;GL831133.1;GL831133.1;GL831133.1;GL831133.1;GL831133.1;GL831133.1;GL831133.1;GL831133.1;GL831133.1;GL831133.1	5297513;5300124;5300771;5301544;5307402;5307969;5309858;5309916;5310007;5310454;5311069;5312559;5314024;5316007;5318945;5323567;5326600;5327488;5328227;5328447;5329104;5329245;5329436;5329663	5297728;5300277;5300814;5301571;5307462;5308026;5309875;5309949;5310066;5310637;5311136;5312734;5314107;5316154;5319006;5323710;5326666;5327691;5328320;5328650;5329152;5329310;5329557;5329763	-;-;-;-;-;-;-;-;-;-;-;-;-;-;-;-;-;-;-;-;-;-;-;-	2446	472	704	385	610	504	787	468	620	574	529	591	424	496	670	607	545	689	436	402	455	521	419	618	489	916	515	499	339	285	468
ENSONIG00000002901	GL831133.1;GL831133.1;GL831133.1	5338248;5340700;5342311	5339023;5340904;5344740	+;+;+	3411	697	1286	475	1007	1188	1877	657	1346	824	932	950	695	1133	1093	1546	1004	1006	914	596	701	662	915	1110	1011	1704	936	1041	885	423	901
ENSONIG00000002903	GL831133.1;GL831133.1;GL831133.1;GL831133.1;GL831133.1;GL831133.1	5347325;5348734;5349430;5349738;5352567;5353098	5348616;5348809;5349604;5349892;5352653;5353514	-;-;-;-;-;-	2202	3052	4019	2270	3245	3305	4546	2058	3590	3034	3187	2838	1830	3183	3238	4097	3147	3439	2904	2122	2754	2151	2503	3226	2415	3386	2650	2308	2335	1340	2631
ENSONIG00000002904	GL831133.1;GL831133.1;GL831133.1;GL831133.1;GL831133.1;GL831133.1;GL831133.1;GL831133.1;GL831133.1;GL831133.1;GL831133.1;GL831133.1;GL831133.1;GL831133.1;GL831133.1;GL831133.1;GL831133.1;GL831133.1;GL831133.1;GL831133.1;GL831133.1;GL831133.1;GL831133.1;GL831133.1;GL831133.1;GL831133.1;GL831133.1;GL831133.1;GL831133.1;GL831133.1;GL831133.1;GL831133.1;GL831133.1;GL831133.1;GL831133.1;GL831133.1;GL8…	5353755;5355095;5356505;5356505;5356757;5356757;5357543;5357543;5358125;5358125;5358341;5358341;5358831;5358831;5359116;5359116;5359392;5359392;5360971;5360971;5362319;5362319;5363209;5363209;5363368;5363368;5363668;5363668;5365193;5365193;5365561;5365561;5365876;5365876;5366172;5366522;5366522	5355243;5355243;5356619;5356619;5356829;5356829;5357647;5357647;5358225;5358225;5358418;5358418;5358968;5358968;5359278;5359278;5359558;5359558;5361069;5361069;5362465;5362465;5363287;5363287;5363432;5363432;5363785;5363785;5365317;5365317;5365684;5365684;5366063;5366063;5366258;5366863;5366858	-;-;-;-;-;-;-;-;-;-;-;-;-;-;-;-;-;-;-;-;-;-;-;-;-;-;-;-;-;-;-;-;-;-;-;-;-	3803	954	1645	671	1177	1318	1974	806	1340	1262	1044	1295	827	1287	1151	1618	1101	1250	1044	828	929	944	1074	1213	1089	1552	1167	1117	936	528	903
ENSONIG00000002912	GL831133.1;GL831133.1;GL831133.1;GL831133.1;GL831133.1;GL831133.1;GL831133.1;GL831133.1;GL831133.1;GL831133.1;GL831133.1;GL831133.1;GL831133.1;GL831133.1;GL831133.1;GL831133.1;GL831133.1;GL831133.1;GL831133.1;GL831133.1;GL831133.1;GL831133.1;GL831133.1;GL831133.1;GL831133.1;GL831133.1;GL831133.1;GL831133.1;GL831133.1;GL831133.1;GL831133.1;GL831133.1;GL831133.1	5367392;5368248;5368286;5369330;5369330;5370124;5370124;5370463;5370463;5370694;5370694;5371570;5371570;5372980;5372980;5373303;5373303;5373550;5373550;5373789;5373789;5374636;5374636;5375022;5375022;5376546;5376555;5379201;5379201;5379383;5379383;5379510;5381612	5367693;5368390;5368390;5369470;5369470;5370244;5370244;5370558;5370558;5370837;5370837;5371652;5371652;5373135;5373135;5373408;5373408;5373590;5373590;5373891;5373891;5374700;5374700;5375100;5375100;5376595;5376595;5379248;5379248;5379446;5379446;5379523;5381766	+;+;+;+;+;+;+;+;+;+;+;+;+;+;+;+;+;+;+;+;+;+;+;+;+;+;+;+;+;+;+;+;+	1911	291	434	254	314	318	405	324	413	391	331	304	154	263	356	463	345	542	391	242	295	262	354	336	317	489	293	287	275	162	271
ENSONIG00000002918	GL831133.1;GL831133.1;GL831133.1;GL831133.1	5387368;5387430;5387585;5388040	5387385;5387452;5387615;5388639	-;-;-;-	672	32	54	17	24	78	31	18	35	20	21	29	27	44	38	54	20	13	36	14	17	30	29	49	19	25	29	50	50	9	21
ENSONIG00000002919	GL831133.1;GL831133.1;GL831133.1	5398682;5399250;5402033	5398906;5399337;5402190	-;-;-	471	1723	2244	1112	1926	2025	3589	1449	2456	1743	1877	1972	1265	1936	2109	2142	1865	1949	1643	1236	1404	1219	1298	2324	1500	1715	1920	1272	1496	865	1461
ENSONIG00000002920	GL831133.1;GL831133.1;GL831133.1;GL831133.1;GL831133.1;GL831133.1;GL831133.1;GL831133.1;GL831133.1;GL831133.1;GL831133.1;GL831133.1	5429807;5430310;5431350;5432066;5432676;5432976;5433189;5433761;5438582;5442177;5443056;5443766	5429989;5430396;5431545;5432139;5432766;5433075;5433254;5433854;5438801;5442289;5443169;5443780	-;-;-;-;-;-;-;-;-;-;-;-	1353	304	666	349	343	392	761	518	518	567	504	493	403	473	513	625	402	687	505	488	426	391	423	446	504	394	565	309	311	236	397
ENSONIG00000002932	GL831133.1;GL831133.1;GL831133.1;GL831133.1;GL831133.1;GL831133.1;GL831133.1;GL831133.1;GL831133.1	5484020;5485873;5486859;5492568;5496603;5500418;5502797;5504010;5504333	5484354;5486090;5487015;5492918;5496639;5500515;5502981;5504189;5504472	-;-;-;-;-;-;-;-;-	1701	128	210	128	143	122	227	164	154	153	153	118	127	216	167	191	122	151	142	106	88	156	148	157	179	159	119	103	133	59	169
ENSONIG00000002935	GL831133.1;GL831133.1;GL831133.1;GL831133.1;GL831133.1;GL831133.1	5505974;5506526;5506783;5507112;5507302;5507520	5506271;5506612;5506906;5507201;5507428;5508359	-;-;-;-;-;-	1566	16	146	72	58	55	116	26	23	50	32	67	21	46	127	41	34	22	30	9	31	59	40	95	40	115	97	63	34	4	47
ENSONIG00000002944	GL831133.1;GL831133.1;GL831133.1;GL831133.1;GL831133.1;GL831133.1;GL831133.1;GL831133.1;GL831133.1;GL831133.1;GL831133.1	5543572;5546737;5547113;5547653;5548078;5548451;5549530;5550104;5551878;5578456;5580328	5546071;5546772;5547148;5547792;5548192;5548584;5549667;5550238;5551930;5578536;5580941	-;-;-;-;-;-;-;-;-;-;-	3982	34	49	35	21	31	43	80	40	28	30	41	53	44	65	72	37	41	63	22	14	38	50	41	43	72	37	23	20	13	42
ENSONIG00000002946	GL831133.1;GL831133.1;GL831133.1;GL831133.1;GL831133.1	5640625;5641050;5641512;5642013;5642345	5640761;5641155;5641707;5642125;5642461	+;+;+;+;+	669	115	198	103	119	158	152	105	144	156	128	185	97	191	140	215	121	168	127	114	94	116	112	171	136	196	115	112	72	75	132
ENSONIG00000002947	GL831133.1;GL831133.1;GL831133.1;GL831133.1;GL831133.1;GL831133.1;GL831133.1;GL831133.1;GL831133.1;GL831133.1	5652780;5653140;5654291;5654745;5655704;5656039;5656308;5661260;5661601;5662024	5652873;5653771;5654396;5654940;5655819;5656174;5656339;5661287;5661638;5662263	+;+;+;+;+;+;+;+;+;+	1618	189	176	155	157	154	193	116	167	135	127	178	106	143	142	202	110	151	106	61	110	111	117	122	157	167	100	106	93	77	121
ENSONIG00000002949	GL831133.1;GL831133.1;GL831133.1;GL831133.1;GL831133.1;GL831133.1;GL831133.1;GL831133.1;GL831133.1;GL831133.1;GL831133.1;GL831133.1;GL831133.1;GL831133.1;GL831133.1;GL831133.1;GL831133.1;GL831133.1;GL831133.1;GL831133.1;GL831133.1;GL831133.1;GL831133.1;GL831133.1;GL831133.1;GL831133.1;GL831133.1	5671152;5671152;5671152;5671331;5671460;5671460;5671460;5672311;5672311;5672311;5675421;5675858;5675858;5675858;5678064;5678064;5678064;5695857;5695857;5695857;5696559;5696559;5696559;5723642;5723642;5723642;5725275	5671354;5671279;5671354;5671354;5671552;5671552;5671552;5672583;5672583;5672583;5675432;5676117;5676117;5676117;5678247;5678247;5678247;5695929;5695929;5695929;5696633;5696633;5696633;5724085;5724217;5724274;5725310	-;-;-;-;-;-;-;-;-;-;-;-;-;-;-;-;-;-;-;-;-;-;-;-;-;-;-	1842	14	23	13	19	2	15	2	3	4	3	21	12	28	10	35	12	4	9	9	6	21	10	7	11	1	18	10	5	9	17
ENSONIG00000002951	GL831133.1;GL831133.1;GL831133.1;GL831133.1;GL831133.1;GL831133.1;GL831133.1;GL831133.1;GL831133.1;GL831133.1;GL831133.1;GL831133.1;GL831133.1	5729602;5731968;5731969;5732765;5733541;5733541;5734713;5734713;5734908;5734908;5735802;5735802;5737829	5731877;5732118;5732118;5732767;5733592;5733592;5734790;5734790;5735001;5735001;5735859;5735910;5738048	-;-;-;-;-;-;-;-;-;-;-;-;-	2983	1492	1815	1064	1328	1372	1883	1043	1802	1037	1194	1579	936	1511	1345	1523	1022	1525	1049	836	1021	1049	1257	1216	1148	1447	1241	973	1100	592	1213
ENSONIG00000002953	GL831133.1;GL831133.1;GL831133.1;GL831133.1;GL831133.1	5738133;5739600;5739870;5740090;5741750	5739389;5739722;5739991;5740206;5741938	-;-;-;-;-	1808	2048	2859	1394	3018	2942	3471	1894	3151	2339	2258	4315	2326	3329	3212	4971	3090	2489	2201	1423	1822	2846	3216	3446	2913	3313	2310	1547	1922	1213	1847
ENSONIG00000002954	GL831133.1;GL831133.1;GL831133.1;GL831133.1;GL831133.1;GL831133.1;GL831133.1;GL831133.1;GL831133.1;GL831133.1;GL831133.1;GL831133.1;GL831133.1;GL831133.1;GL831133.1	5742615;5745070;5745752;5745752;5747051;5747051;5748597;5750090;5750448;5756613;5756613;5763024;5763024;5765156;5765156	5745138;5745138;5745896;5745896;5747170;5747170;5748602;5750207;5750565;5756661;5756661;5763065;5763065;5765262;5765227	-;-;-;-;-;-;-;-;-;-;-;-;-;-;-	3229	1124	1405	917	1198	1094	1890	1047	1228	1357	1065	1369	1042	1401	1447	1695	1034	1543	1062	943	957	1195	1190	1365	1239	1995	1157	860	897	608	783
ENSONIG00000002957	GL831133.1;GL831133.1;GL831133.1;GL831133.1;GL831133.1;GL831133.1;GL831133.1;GL831133.1;GL831133.1	5788527;5788682;5788945;5789525;5789720;5791612;5791832;5792096;5792233	5788602;5788841;5789129;5789627;5789926;5791749;5791869;5792136;5792400	-;-;-;-;-;-;-;-;-	1116	492	683	431	585	556	785	320	625	475	599	510	317	526	646	696	484	536	471	308	462	418	536	565	418	878	467	440	499	229	453
ENSONIG00000002961	GL831133.1;GL831133.1;GL831133.1;GL831133.1;GL831133.1;GL831133.1;GL831133.1;GL831133.1;GL831133.1;GL831133.1;GL831133.1;GL831133.1;GL831133.1;GL831133.1;GL831133.1;GL831133.1;GL831133.1;GL831133.1;GL831133.1;GL831133.1;GL831133.1;GL831133.1;GL831133.1;GL831133.1;GL831133.1;GL831133.1;GL831133.1;GL831133.1;GL831133.1;GL831133.1;GL831133.1;GL831133.1;GL831133.1;GL831133.1;GL831133.1;GL831133.1;GL8…	5798508;5798508;5800289;5800289;5800557;5800557;5800971;5800971;5801340;5801340;5801586;5801586;5802453;5802453;5803420;5803420;5803660;5803660;5804538;5804689;5804689;5804928;5804928;5806495;5806495;5806808;5806808;5808427;5808427;5809207;5809207;5809586;5809586;5810800;5810800;5811989;5811989;5812474;5812474;5845690;5845690;5855847;5855847	5799051;5799051;5800423;5800423;5800686;5800686;5801133;5801133;5801447;5801447;5801815;5801815;5802523;5802523;5803519;5803519;5803819;5803810;5804549;5804822;5804822;5805232;5805232;5806699;5806699;5806975;5806975;5808662;5808662;5809333;5809333;5809794;5809794;5810944;5810944;5812125;5812125;5812780;5812789;5846256;5846256;5855937;5855937	-;-;-;-;-;-;-;-;-;-;-;-;-;-;-;-;-;-;-;-;-;-;-;-;-;-;-;-;-;-;-;-;-;-;-;-;-;-;-;-;-;-;-	4293	725	1360	393	869	900	979	638	723	629	956	695	547	817	1024	950	814	592	539	427	471	659	887	937	963	536	593	882	514	421	715
ENSONIG00000002975	GL831133.1;GL831133.1;GL831133.1;GL831133.1;GL831133.1;GL831133.1	5867342;5869690;5870275;5872841;5873980;5875613	5867699;5869781;5870386;5872912;5874087;5876657	+;+;+;+;+;+	1787	4586	6291	3463	4885	5027	7118	4143	5869	4958	4175	6155	3930	5517	5741	7732	4901	6088	4503	3406	4393	5123	4814	5156	4360	8497	4833	3736	3995	2171	4052
ENSONIG00000002978	GL831133.1;GL831133.1;GL831133.1;GL831133.1;GL831133.1;GL831133.1;GL831133.1;GL831133.1;GL831133.1;GL831133.1;GL831133.1;GL831133.1;GL831133.1;GL831133.1;GL831133.1;GL831133.1;GL831133.1;GL831133.1;GL831133.1;GL831133.1;GL831133.1	5876674;5884599;5886005;5886429;5886735;5886977;5887826;5888088;5888576;5888821;5889019;5889510;5889738;5892428;5892558;5892815;5893000;5893703;5894708;5895096;5895306	5877025;5885309;5886147;5886565;5886861;5887131;5887939;5888231;5888641;5888886;5889194;5889586;5889871;5892483;5892705;5892906;5893110;5893870;5894848;5895177;5898325	+;+;+;+;+;+;+;+;+;+;+;+;+;+;+;+;+;+;+;+;+	6220	103	638	197	201	109	295	590	291	811	241	415	648	465	606	402	154	721	420	670	186	671	424	282	412	773	575	315	218	68	140
ENSONIG00000002988	GL831133.1;GL831133.1;GL831133.1;GL831133.1;GL831133.1;GL831133.1;GL831133.1;GL831133.1;GL831133.1;GL831133.1;GL831133.1;GL831133.1;GL831133.1;GL831133.1;GL831133.1;GL831133.1;GL831133.1;GL831133.1;GL831133.1;GL831133.1;GL831133.1	5898857;5901915;5903324;5903795;5904480;5904690;5904931;5905152;5906728;5906913;5908425;5908726;5908888;5909102;5909245;5909584;5911000;5911333;5911706;5912377;5912580	5899045;5902515;5903466;5903937;5904606;5904844;5905044;5905295;5906793;5906978;5908597;5908802;5909021;5909157;5909392;5909675;5911110;5911500;5911846;5912458;5913118	+;+;+;+;+;+;+;+;+;+;+;+;+;+;+;+;+;+;+;+;+	3469	0	0	0	0	0	0	2	0	0	0	0	0	0	0	0	0	2	0	0	0	0	1	11	2	0	0	1	0	0	0
ENSONIG00000002991	GL831133.1;GL831133.1;GL831133.1;GL831133.1;GL831133.1	5921077;5921242;5921525;5921817;5923232	5921144;5921789;5921945;5921956;5923269	-;-;-;-;-	821	0	0	0	0	0	0	0	0	0	0	0	0	0	0	0	0	0	0	0	0	0	0	0	0	0	0	0	0	0	0
ENSONIG00000002992	GL831133.1;GL831133.1;GL831133.1;GL831133.1;GL831133.1;GL831133.1;GL831133.1;GL831133.1;GL831133.1;GL831133.1;GL831133.1;GL831133.1;GL831133.1	5930244;5931675;5931933;5932230;5932457;5932755;5932977;5934328;5934910;5936375;5938225;5942639;5947505	5930436;5931834;5932133;5932363;5932621;5932843;5933090;5934417;5935043;5936526;5938405;5943367;5947681	-;-;-;-;-;-;-;-;-;-;-;-;-	2519	2	4	0	0	5	0	0	8	0	0	8	0	2	4	0	19	0	0	0	0	0	0	0	18	1	0	9	0	0	0
ENSONIG00000022662	GL831133.1;GL831133.1	5947903;5950931	5948039;5951300	+;+	507	0	0	0	0	0	0	0	0	0	0	0	0	0	0	0	0	0	0	0	0	0	0	0	0	0	0	0	1	0	0
ENSONIG00000003000	GL831133.1;GL831133.1;GL831133.1;GL831133.1;GL831133.1;GL831133.1;GL831133.1;GL831133.1;GL831133.1;GL831133.1;GL831133.1;GL831133.1;GL831133.1;GL831133.1;GL831133.1;GL831133.1;GL831133.1;GL831133.1;GL831133.1;GL831133.1;GL831133.1;GL831133.1;GL831133.1;GL831133.1;GL831133.1;GL831133.1;GL831133.1;GL831133.1;GL831133.1;GL831133.1;GL831133.1;GL831133.1;GL831133.1;GL831133.1;GL831133.1;GL831133.1;GL8…	5959203;5979417;5987968;5993383;5994101;6001941;6003513;6003986;6007497;6019624;6027814;6030720;6038667;6039285;6041704;6041966;6041985;6046548;6046548;6049680;6049680;6049857;6049857;6050594;6050594;6050936;6050936;6051271;6051271;6052456;6052456;6053155;6053155;6053793;6053793;6056785;6056785;6057112;6057124;6060799;6060799;6061871;6061895;6062068;6062068;6065932;6068057;6069142;6069565;6069994…	5959608;5979460;5988121;5993537;5994272;6002124;6003708;6006101;6007582;6019678;6027959;6031078;6038844;6039387;6041743;6042077;6042092;6046707;6046707;6049747;6049747;6049923;6049923;6050741;6050741;6051048;6051048;6051417;6051417;6052712;6052712;6053280;6053280;6053910;6053910;6057033;6057033;6057200;6057200;6060980;6060980;6061953;6061953;6062256;6062256;6066084;6068148;6069181;6069638;6070014…	+;+;+;+;+;+;+;+;+;+;+;+;+;+;+;+;+;+;+;+;+;+;+;+;+;+;+;+;+;+;+;+;+;+;+;+;+;+;+;+;+;+;+;+;+;+;+;+;+;+;+;+;+;+;+;+;+;+;+	7534	227	311	130	235	218	229	149	250	206	187	237	190	239	177	200	270	160	189	132	126	176	226	281	297	126	171	185	192	156	194
ENSONIG00000003007	GL831133.1;GL831133.1;GL831133.1;GL831133.1;GL831133.1;GL831133.1;GL831133.1;GL831133.1;GL831133.1;GL831133.1;GL831133.1;GL831133.1;GL831133.1;GL831133.1;GL831133.1;GL831133.1;GL831133.1;GL831133.1;GL831133.1;GL831133.1;GL831133.1;GL831133.1;GL831133.1;GL831133.1;GL831133.1;GL831133.1;GL831133.1;GL831133.1;GL831133.1;GL831133.1;GL831133.1	6248305;6252557;6257669;6257669;6270596;6270596;6272761;6272761;6277227;6277227;6294458;6294458;6338317;6338317;6340708;6340708;6342594;6343473;6344071;6344071;6350343;6350343;6351917;6351917;6352575;6352575;6365472;6413622;6418894;6455769;6457558	6252742;6252742;6257827;6257827;6270839;6270839;6272933;6272933;6277357;6277357;6294646;6294646;6338419;6338419;6340773;6340751;6342610;6343487;6344370;6344370;6350484;6350484;6352059;6352059;6352728;6352729;6365540;6413693;6418968;6456385;6457753	-;-;-;-;-;-;-;-;-;-;-;-;-;-;-;-;-;-;-;-;-;-;-;-;-;-;-;-;-;-;-	7304	5568	9450	4239	6127	6587	10041	4941	7465	6706	7134	6201	3343	6515	5762	6619	6075	6663	6030	4864	5545	4931	6288	6231	5969	7678	6026	6730	5001	2736	5464
ENSONIG00000026082	GL831133.1;GL831133.1	6537605;6538570	6537966;6538823	+;+	616	0	6	0	2	2	3	9	4	3	0	0	0	13	11	0	0	0	0	5	0	0	1	7	7	0	9	3	5	0	1
ENSONIG00000026750	GL831133.1;GL831133.1	6569689;6570028	6569924;6570594	+;+	803	0	0	0	0	0	0	0	0	0	0	0	0	0	0	0	0	0	0	0	0	0	0	0	0	0	0	1	0	0	3
ENSONIG00000003015	GL831133.1;GL831133.1;GL831133.1;GL831133.1	6610262;6614350;6614919;6618003	6611868;6614520;6615120;6618519	-;-;-;-	2497	203	564	161	333	344	418	304	323	398	190	330	381	399	393	465	311	608	348	324	181	416	352	275	303	932	370	377	209	134	245
ENSONIG00000003016	GL831133.1;GL831133.1;GL831133.1;GL831133.1;GL831133.1;GL831133.1;GL831133.1	6618694;6618906;6619129;6622984;6623498;6624471;6625600	6618797;6618940;6619227;6623082;6623627;6624536;6628695	+;+;+;+;+;+;+	3629	579	836	314	674	771	969	517	820	607	642	1038	565	727	662	1158	815	644	619	375	464	635	722	667	672	901	596	509	494	292	494
ENSONIG00000003019	GL831133.1;GL831133.1;GL831133.1;GL831133.1;GL831133.1;GL831133.1;GL831133.1;GL831133.1;GL831133.1;GL831133.1;GL831133.1;GL831133.1;GL831133.1;GL831133.1;GL831133.1;GL831133.1;GL831133.1;GL831133.1	6628766;6631528;6632663;6632877;6633322;6633520;6633986;6634258;6634636;6634938;6636211;6636700;6637176;6637427;6637776;6638283;6638632;6639860	6630853;6631710;6632752;6632971;6633434;6633668;6634119;6634413;6634760;6635130;6636360;6636817;6637297;6637590;6637857;6638416;6638908;6640269	-;-;-;-;-;-;-;-;-;-;-;-;-;-;-;-;-;-	4783	1354	2445	1032	1599	1737	2484	1106	2063	1526	1778	1857	989	1634	1931	2021	1482	1713	1498	1216	1296	1328	1415	1845	1471	1708	1718	1329	1140	802	1270
ENSONIG00000003025	GL831133.1;GL831133.1;GL831133.1	6641732;6646590;6659049	6644532;6646720;6659366	-;-;-	3250	3121	3902	2102	3383	3148	4793	2785	4004	3115	3157	3764	2096	3601	3543	3740	2892	3841	2938	2392	2945	2998	3121	2861	2798	4854	3192	2264	2408	1245	2944
ENSONIG00000026576	GL831133.1;GL831133.1	6672031;6673064	6672204;6673579	+;+	690	0	0	0	0	0	0	0	0	0	0	0	0	2	0	0	0	0	0	0	0	0	0	0	0	0	0	0	0	0	0
ENSONIG00000003026	GL831133.1;GL831133.1;GL831133.1;GL831133.1;GL831133.1;GL831133.1;GL831133.1;GL831133.1;GL831133.1;GL831133.1;GL831133.1;GL831133.1;GL831133.1;GL831133.1;GL831133.1;GL831133.1;GL831133.1;GL831133.1;GL831133.1;GL831133.1;GL831133.1;GL831133.1;GL831133.1;GL831133.1;GL831133.1;GL831133.1;GL831133.1;GL831133.1;GL831133.1;GL831133.1;GL831133.1;GL831133.1;GL831133.1;GL831133.1;GL831133.1;GL831133.1;GL8…	6692573;6692879;6698791;6698791;6710251;6710251;6710709;6710709;6710898;6710898;6711527;6711527;6712982;6712982;6713801;6713801;6718612;6718612;6719122;6719122;6719331;6719331;6719627;6719627;6719932;6719941;6720611;6720611;6721967;6721967;6722230;6722230;6722504;6722504;6722689;6722905;6722905;6723161;6723161;6723436;6723436;6724083;6724083;6724329;6724329;6724646;6724646;6724883;6724883;6725148…	6692933;6692933;6698884;6698884;6710263;6710263;6710769;6710769;6710990;6710990;6711707;6711707;6713069;6713069;6713935;6713935;6718724;6718724;6719233;6719233;6719543;6719543;6719737;6719737;6720066;6720066;6720741;6720741;6722053;6722053;6722420;6722420;6722631;6722783;6722783;6723067;6723067;6723316;6723316;6723585;6723585;6724208;6724208;6724502;6724502;6724803;6724803;6725015;6725015;6725303…	+;+;+;+;+;+;+;+;+;+;+;+;+;+;+;+;+;+;+;+;+;+;+;+;+;+;+;+;+;+;+;+;+;+;+;+;+;+;+;+;+;+;+;+;+;+;+;+;+;+;+;+;+;+;+;+;+;+;+;+;+;+;+;+;+;+;+;+;+;+;+;+;+;+;+;+;+;+	6893	352	440	215	408	258	346	203	383	339	427	313	218	329	273	246	253	163	230	207	242	284	408	476	388	63	180	197	171	244	295
ENSONIG00000003040	GL831133.1;GL831133.1;GL831133.1;GL831133.1;GL831133.1;GL831133.1;GL831133.1;GL831133.1;GL831133.1;GL831133.1	6746170;6747640;6748162;6748515;6748703;6748872;6750725;6750938;6752730;6753279	6746334;6747734;6748252;6748519;6748785;6749028;6750835;6751023;6753208;6753326	-;-;-;-;-;-;-;-;-;-	1320	57	83	56	98	31	90	70	47	73	73	87	67	54	58	90	61	51	75	30	40	90	71	70	74	7	55	42	34	28	66
ENSONIG00000003045	GL831133.1;GL831133.1;GL831133.1;GL831133.1;GL831133.1;GL831133.1;GL831133.1;GL831133.1;GL831133.1;GL831133.1;GL831133.1;GL831133.1;GL831133.1;GL831133.1;GL831133.1;GL831133.1;GL831133.1;GL831133.1;GL831133.1;GL831133.1;GL831133.1;GL831133.1;GL831133.1;GL831133.1;GL831133.1;GL831133.1;GL831133.1;GL831133.1;GL831133.1;GL831133.1;GL831133.1;GL831133.1	6761326;6761353;6761682;6761682;6761893;6761893;6762350;6762350;6763680;6763680;6763924;6763924;6764386;6764386;6764758;6764758;6765304;6765304;6765767;6765767;6766606;6766606;6766767;6766767;6767070;6767070;6768508;6768508;6769413;6769413;6769942;6771989	6761426;6761426;6761787;6761787;6761995;6761995;6762457;6762457;6763746;6763746;6763972;6763972;6764562;6764562;6764836;6764836;6765474;6765474;6765859;6765859;6766640;6766640;6766863;6766863;6767125;6767125;6768551;6768551;6769842;6770006;6770004;6772235	-;-;-;-;-;-;-;-;-;-;-;-;-;-;-;-;-;-;-;-;-;-;-;-;-;-;-;-;-;-;-;-	2127	149	198	130	137	189	240	99	188	127	126	148	116	181	163	154	142	106	124	71	93	113	135	159	135	143	110	118	95	87	144
ENSONIG00000003054	GL831133.1;GL831133.1;GL831133.1;GL831133.1;GL831133.1;GL831133.1;GL831133.1;GL831133.1;GL831133.1;GL831133.1;GL831133.1;GL831133.1;GL831133.1;GL831133.1;GL831133.1;GL831133.1;GL831133.1;GL831133.1;GL831133.1;GL831133.1;GL831133.1;GL831133.1;GL831133.1;GL831133.1;GL831133.1;GL831133.1;GL831133.1;GL831133.1;GL831133.1;GL831133.1;GL831133.1;GL831133.1;GL831133.1;GL831133.1;GL831133.1;GL831133.1;GL8…	6773255;6773424;6775851;6775851;6776054;6776054;6776234;6776234;6776503;6776503;6776930;6776930;6777107;6777107;6777359;6777359;6777664;6777664;6779141;6779141;6779470;6779470;6779661;6779661;6783407;6783407;6783843;6783843;6784070;6784070;6784350;6784350;6784566;6784566;6785523;6785879;6786381;6787369;6787369;6787678;6787678;6787994;6787994;6790333;6790333;6790469;6790469;6791112;6791112;6791301…	6773469;6773469;6775935;6775935;6776153;6776153;6776390;6776390;6776639;6776639;6777024;6777024;6777233;6777233;6777551;6777551;6777835;6777835;6779374;6779374;6779554;6779554;6779720;6779720;6783517;6783517;6783979;6783979;6784277;6784277;6784462;6784462;6784683;6784683;6785702;6786046;6786539;6787572;6787572;6787914;6787914;6788259;6788259;6790384;6790384;6790678;6790678;6791184;6791184;6791380…	+;+;+;+;+;+;+;+;+;+;+;+;+;+;+;+;+;+;+;+;+;+;+;+;+;+;+;+;+;+;+;+;+;+;+;+;+;+;+;+;+;+;+;+;+;+;+;+;+;+;+;+;+;+;+;+;+;+;+;+;+;+;+;+;+;+;+	6556	1881	3527	1758	2315	2486	3830	1991	2737	2370	2573	2610	1516	2347	2806	3221	2573	2931	2472	2079	2180	1951	2427	2750	2041	2745	2384	1981	2079	1303	2267
ENSONIG00000003062	GL831133.1;GL831133.1;GL831133.1;GL831133.1;GL831133.1;GL831133.1	6795254;6799397;6799648;6800009;6800190;6800597	6795713;6799479;6799788;6800076;6800279;6803823	+;+;+;+;+;+	4069	803	1166	453	815	870	1220	788	1137	844	806	1244	865	1306	984	1444	909	890	759	548	774	863	1005	1214	1317	768	954	607	715	367	722
ENSONIG00000003063	GL831133.1;GL831133.1;GL831133.1;GL831133.1	6823751;6824515;6826949;6828123	6823937;6825122;6827153;6829394	+;+;+;+	2272	17	71	18	47	62	84	15	39	4	34	44	14	47	19	33	18	26	36	4	41	12	14	21	65	18	24	27	19	14	12
ENSONIG00000003064	GL831133.1;GL831133.1;GL831133.1;GL831133.1;GL831133.1;GL831133.1;GL831133.1;GL831133.1;GL831133.1;GL831133.1;GL831133.1;GL831133.1;GL831133.1;GL831133.1;GL831133.1;GL831133.1;GL831133.1;GL831133.1;GL831133.1;GL831133.1;GL831133.1	6846690;6846990;6847537;6850218;6850218;6863176;6863176;6863418;6863418;6863840;6863840;6864801;6864801;6865216;6865216;6865488;6865488;6866035;6866035;6866322;6866322	6847667;6847038;6847667;6850677;6850677;6863274;6863274;6863687;6863687;6864004;6864004;6864999;6864999;6865351;6865351;6865660;6865660;6866099;6866099;6866698;6871589	+;+;+;+;+;+;+;+;+;+;+;+;+;+;+;+;+;+;+;+;+	7813	3660	5595	2646	4283	4405	5596	2843	4484	4400	3825	4399	2415	4283	4258	4217	3084	4236	3445	3126	3291	3585	3451	4173	3614	4327	3109	3298	2955	1619	3019
ENSONIG00000003070	GL831133.1;GL831133.1;GL831133.1;GL831133.1;GL831133.1;GL831133.1;GL831133.1	6880259;6881030;6881195;6882772;6882772;6885314;6885314	6881528;6881131;6881528;6883296;6883296;6885588;6887182	+;+;+;+;+;+;+	3664	2770	4010	1853	2805	3105	4816	2508	3937	2926	2898	2898	1879	3055	3073	3620	2727	3644	2768	2358	2580	2373	2531	2940	2415	3769	2984	3044	2343	1433	2829
ENSONIG00000003073	GL831133.1;GL831133.1;GL831133.1;GL831133.1;GL831133.1;GL831133.1;GL831133.1;GL831133.1;GL831133.1;GL831133.1;GL831133.1;GL831133.1;GL831133.1;GL831133.1;GL831133.1;GL831133.1;GL831133.1;GL831133.1;GL831133.1;GL831133.1;GL831133.1;GL831133.1;GL831133.1;GL831133.1;GL831133.1;GL831133.1;GL831133.1;GL831133.1;GL831133.1;GL831133.1;GL831133.1;GL831133.1;GL831133.1;GL831133.1;GL831133.1;GL831133.1;GL8…	6915005;6915008;6915502;6915502;6916511;6916511;6917100;6917100;6917470;6917470;6919354;6919354;6920457;6921182;6921197;6925288;6925288;6926442;6926442;6926627;6926627;6926911;6926911;6927195;6927195;6927388;6927388;6929659;6929659;6929992;6929992;6932919;6932919;6933468;6933920;6934453;6934729;6934908;6934927;6937031;6937031;6937450;6937450;6939995;6939995;6946158;6946158;6946388;6946388;6956721…	6915055;6915055;6915516;6915516;6916608;6916608;6917209;6917209;6917579;6917579;6919395;6919395;6920489;6921295;6921295;6925407;6925407;6926516;6926516;6926728;6926728;6927013;6927013;6927297;6927297;6927481;6927481;6929839;6929839;6930122;6930122;6933106;6933089;6933480;6934016;6934471;6934761;6935041;6935041;6937107;6937107;6937592;6937592;6940112;6940112;6946313;6946313;6946719;6946719;6956931…	-;-;-;-;-;-;-;-;-;-;-;-;-;-;-;-;-;-;-;-;-;-;-;-;-;-;-;-;-;-;-;-;-;-;-;-;-;-;-;-;-;-;-;-;-;-;-;-;-;-;-	3003	34	123	64	85	47	41	44	155	30	41	54	13	73	89	172	43	39	27	49	41	61	62	55	92	104	110	48	60	19	38
ENSONIG00000003076	GL831133.1;GL831133.1;GL831133.1;GL831133.1;GL831133.1;GL831133.1;GL831133.1;GL831133.1;GL831133.1;GL831133.1;GL831133.1;GL831133.1;GL831133.1;GL831133.1;GL831133.1;GL831133.1;GL831133.1;GL831133.1;GL831133.1;GL831133.1;GL831133.1	6958475;6960131;6961034;6961145;6961145;6962334;6962971;6962971;6966441;6966441;6966781;6967470;6967470;6968080;6968080;6968562;6968562;6977240;6977240;6982298;6982298	6960464;6960464;6961063;6961247;6961247;6962342;6963094;6963094;6966574;6966574;6966819;6967529;6967523;6968287;6968287;6968696;6968696;6977443;6977443;6982351;6982483	-;-;-;-;-;-;-;-;-;-;-;-;-;-;-;-;-;-;-;-;-	3222	198	266	197	232	231	234	118	244	211	171	225	76	311	237	238	172	236	202	169	168	146	256	227	172	308	180	149	193	99	130
ENSONIG00000003078	GL831133.1;GL831133.1;GL831133.1;GL831133.1;GL831133.1;GL831133.1;GL831133.1;GL831133.1;GL831133.1;GL831133.1;GL831133.1;GL831133.1;GL831133.1;GL831133.1;GL831133.1;GL831133.1;GL831133.1;GL831133.1;GL831133.1;GL831133.1;GL831133.1;GL831133.1;GL831133.1;GL831133.1;GL831133.1;GL831133.1;GL831133.1;GL831133.1;GL831133.1;GL831133.1	7008314;7008482;7008757;7009091;7009249;7009572;7009881;7010064;7010455;7010751;7011136;7011702;7012011;7012322;7012556;7013694;7014210;7014577;7014918;7015100;7015892;7016133;7016575;7016773;7017482;7018243;7018501;7019475;7019828;7020111	7008406;7008646;7008870;7009169;7009408;7009761;7009970;7010253;7010592;7010977;7011330;7011805;7012110;7012420;7012690;7013897;7014282;7014701;7014989;7015330;7015905;7016241;7016682;7016921;7017629;7018416;7018737;7019622;7019974;7020163	-;-;-;-;-;-;-;-;-;-;-;-;-;-;-;-;-;-;-;-;-;-;-;-;-;-;-;-;-;-	4071	0	6	0	0	0	0	0	0	0	0	0	0	7	10	0	6	8	0	15	0	2	6	0	0	0	0	3	0	0	0
ENSONIG00000003096	GL831133.1;GL831133.1;GL831133.1;GL831133.1;GL831133.1;GL831133.1;GL831133.1;GL831133.1;GL831133.1;GL831133.1;GL831133.1;GL831133.1;GL831133.1;GL831133.1;GL831133.1;GL831133.1;GL831133.1;GL831133.1;GL831133.1;GL831133.1;GL831133.1;GL831133.1;GL831133.1;GL831133.1;GL831133.1;GL831133.1;GL831133.1;GL831133.1;GL831133.1;GL831133.1;GL831133.1;GL831133.1	7033136;7035528;7035792;7036388;7036723;7038451;7039257;7040414;7042114;7042519;7042992;7043226;7044543;7045256;7045709;7046428;7046974;7047799;7048080;7048262;7049047;7049345;7049662;7049938;7050212;7050408;7052415;7052653;7054437;7054821;7055079;7055735	7033207;7035589;7035943;7036534;7036870;7038696;7039430;7040561;7042262;7042626;7043204;7043357;7044667;7045328;7045912;7046562;7047025;7047868;7048168;7048365;7049229;7049571;7049799;7050127;7050301;7050597;7052574;7052731;7054550;7054985;7055159;7055752	+;+;+;+;+;+;+;+;+;+;+;+;+;+;+;+;+;+;+;+;+;+;+;+;+;+;+;+;+;+;+;+	4238	0	0	7	5	2	0	0	1	0	0	0	0	4	15	10	18	4	0	0	0	0	0	15	0	0	0	2	0	0	0
ENSONIG00000003116	GL831133.1;GL831133.1;GL831133.1;GL831133.1;GL831133.1;GL831133.1;GL831133.1;GL831133.1;GL831133.1;GL831133.1;GL831133.1;GL831133.1;GL831133.1;GL831133.1;GL831133.1;GL831133.1;GL831133.1;GL831133.1;GL831133.1;GL831133.1;GL831133.1;GL831133.1;GL831133.1;GL831133.1;GL831133.1;GL831133.1;GL831133.1;GL831133.1;GL831133.1;GL831133.1;GL831133.1;GL831133.1;GL831133.1;GL831133.1;GL831133.1;GL831133.1;GL8…	7067198;7077481;7104156;7104156;7106292;7106292;7107879;7107879;7108546;7108546;7109971;7109971;7110909;7110909;7111855;7111855;7112460;7112460;7113884;7113884;7114550;7114595;7115618;7115635;7115862;7116826;7116826;7116948;7117260;7119268;7119377;7120061;7120061;7121043;7121043;7121636;7121636	7067384;7077629;7104245;7104245;7106433;7106433;7108046;7108046;7108726;7108726;7110086;7110086;7111012;7111012;7111938;7111938;7112510;7112510;7114026;7114026;7114809;7114843;7115713;7115713;7115882;7116877;7116889;7117005;7117295;7119460;7119475;7120207;7120207;7121149;7121149;7121677;7121901	-;-;-;-;-;-;-;-;-;-;-;-;-;-;-;-;-;-;-;-;-;-;-;-;-;-;-;-;-;-;-;-;-;-;-;-;-	2712	58	108	58	47	44	125	69	66	62	72	89	42	75	88	121	27	47	68	45	58	57	52	51	80	60	97	90	61	19	39
ENSONIG00000020605	GL831133.1	7095339	7096070	+	732	33	78	53	93	52	70	30	76	54	68	60	42	85	52	76	45	59	20	34	40	60	38	65	69	22	31	37	57	25	44
ENSONIG00000003124	GL831133.1;GL831133.1;GL831133.1;GL831133.1;GL831133.1;GL831133.1;GL831133.1;GL831133.1;GL831133.1;GL831133.1;GL831133.1;GL831133.1;GL831133.1;GL831133.1;GL831133.1;GL831133.1;GL831133.1	7124849;7125782;7127003;7129261;7129801;7130115;7131835;7132205;7134020;7134867;7135282;7136343;7141166;7144343;7149058;7153687;7160664	7125115;7125937;7127149;7129337;7129995;7130234;7131991;7132392;7134186;7134991;7135359;7136418;7141294;7144458;7149147;7153716;7160798	-;-;-;-;-;-;-;-;-;-;-;-;-;-;-;-;-	2253	304	346	225	217	345	391	210	336	285	292	250	177	323	305	438	258	314	214	160	246	247	195	393	300	299	192	168	192	160	302
ENSONIG00000003132	GL831133.1;GL831133.1;GL831133.1;GL831133.1;GL831133.1;GL831133.1;GL831133.1;GL831133.1;GL831133.1;GL831133.1;GL831133.1	7160783;7165312;7167350;7173465;7173778;7174020;7175078;7175287;7175501;7176760;7177036	7160936;7165516;7167501;7173590;7173931;7174143;7175181;7175383;7175650;7176937;7177127	+;+;+;+;+;+;+;+;+;+;+	1536	1384	1848	998	1436	1453	1938	990	1557	1267	1388	1268	961	1417	1593	1648	1211	1800	1350	949	1137	1058	1238	1365	1321	1990	1245	989	1135	555	1103
ENSONIG00000003137	GL831133.1;GL831133.1;GL831133.1;GL831133.1;GL831133.1;GL831133.1;GL831133.1;GL831133.1;GL831133.1;GL831133.1;GL831133.1;GL831133.1;GL831133.1;GL831133.1;GL831133.1;GL831133.1	7182553;7182772;7183462;7183462;7183777;7183777;7184498;7184498;7185746;7185746;7186031;7186031;7186960;7187183;7189168;7189698	7183365;7183365;7183594;7183594;7184249;7184249;7185114;7185114;7185951;7185951;7186170;7186166;7186997;7187216;7189411;7189829	-;-;-;-;-;-;-;-;-;-;-;-;-;-;-;-	2830	439	595	197	479	348	380	425	361	408	536	463	367	451	499	449	503	379	282	280	281	369	496	461	499	222	326	347	268	151	364
ENSONIG00000003138	GL831133.1;GL831133.1;GL831133.1;GL831133.1;GL831133.1;GL831133.1;GL831133.1;GL831133.1;GL831133.1;GL831133.1;GL831133.1;GL831133.1;GL831133.1;GL831133.1;GL831133.1;GL831133.1;GL831133.1;GL831133.1;GL831133.1	7193078;7193615;7194031;7194031;7195260;7195395;7197022;7197666;7198170;7198170;7198463;7198720;7198779;7198907;7198907;7200597;7200597;7201674;7201674	7193739;7193739;7194181;7194175;7195365;7195538;7197086;7197714;7198183;7198366;7198596;7198800;7198800;7199136;7199136;7200656;7200656;7201751;7201938	-;-;-;-;-;-;-;-;-;-;-;-;-;-;-;-;-;-;-	2144	2116	3324	1582	2644	2761	3632	2099	3014	2459	2264	2943	1853	2791	3156	3615	2351	2785	2181	1767	2113	2236	2341	2883	2337	1862	2619	1863	1849	1188	1982
ENSONIG00000003140	GL831133.1;GL831133.1;GL831133.1;GL831133.1;GL831133.1;GL831133.1;GL831133.1;GL831133.1;GL831133.1;GL831133.1;GL831133.1	7206147;7206443;7208134;7208391;7212595;7216746;7217413;7217995;7221316;7221742;7222562	7206184;7206893;7208264;7208504;7212823;7216873;7217460;7218243;7221459;7221798;7222595	-;-;-;-;-;-;-;-;-;-;-	1623	2843	4196	2191	2898	3078	5240	2184	3818	3103	2944	2548	1655	2680	3020	3470	2577	3663	2886	2312	2678	2170	2659	3031	2582	3437	2813	2138	2441	1414	2285
ENSONIG00000003144	GL831133.1;GL831133.1;GL831133.1;GL831133.1;GL831133.1;GL831133.1;GL831133.1;GL831133.1;GL831133.1;GL831133.1;GL831133.1;GL831133.1;GL831133.1;GL831133.1;GL831133.1;GL831133.1;GL831133.1;GL831133.1	7228789;7240829;7241781;7246998;7265256;7268247;7286638;7288720;7313825;7327021;7338913;7350733;7373141;7373358;7373659;7374703;7374975;7375472	7228848;7240946;7241863;7247122;7265334;7268290;7286746;7288870;7313976;7327121;7338994;7350785;7373235;7373435;7373716;7374827;7375056;7375685	-;-;-;-;-;-;-;-;-;-;-;-;-;-;-;-;-;-	1809	2261	3782	1704	2919	2772	3968	2110	3608	2865	2350	2787	1806	2842	2955	4070	2592	3532	2592	2174	2361	2477	2600	2833	2705	4944	2653	2477	2467	1315	2299
ENSONIG00000003149	GL831133.1;GL831133.1;GL831133.1;GL831133.1;GL831133.1;GL831133.1;GL831133.1;GL831133.1;GL831133.1;GL831133.1;GL831133.1;GL831133.1;GL831133.1;GL831133.1;GL831133.1;GL831133.1;GL831133.1;GL831133.1;GL831133.1;GL831133.1;GL831133.1;GL831133.1;GL831133.1;GL831133.1	7510131;7510847;7511495;7522985;7525505;7526896;7527099;7528765;7529677;7529909;7531474;7532171;7538978;7539984;7540286;7540707;7547000;7547779;7552068;7554506;7556478;7556729;7558285;7559288	7510555;7510928;7511808;7523270;7525716;7526979;7527258;7528870;7529814;7530062;7531569;7532319;7539150;7540114;7540409;7540951;7547120;7547905;7552272;7554700;7556548;7556894;7558483;7559403	+;+;+;+;+;+;+;+;+;+;+;+;+;+;+;+;+;+;+;+;+;+;+;+	4079	2	13	0	16	0	0	5	8	6	12	0	2	13	7	11	6	1	0	3	19	4	2	15	13	0	4	6	10	5	0
ENSONIG00000024283	GL831133.1;GL831133.1	7747495;7748382	7747626;7748720	-;-	471	0	0	0	0	0	0	0	0	0	0	0	0	0	0	0	0	0	0	0	0	0	0	0	0	0	0	0	0	0	0
ENSONIG00000003157	GL831133.1;GL831133.1;GL831133.1;GL831133.1;GL831133.1;GL831133.1;GL831133.1;GL831133.1;GL831133.1;GL831133.1;GL831133.1	8029028;8031388;8035556;8036411;8039071;8046758;8053063;8053518;8059817;8084970;8118979	8031211;8031639;8035673;8036532;8039207;8047005;8053250;8053685;8059936;8085261;8119509	-;-;-;-;-;-;-;-;-;-;-	4360	1977	3051	1594	2393	2630	3816	1827	2899	2328	2364	2467	1429	2470	2867	3137	2060	2443	1918	1757	2073	1687	2110	2433	2047	2626	2249	2295	1729	1243	1555
ENSONIG00000023961	GL831133.1;GL831133.1	8252263;8253749	8253660;8253854	-;-	1504	0	0	0	0	0	0	0	0	0	0	0	0	0	0	0	0	0	0	0	0	0	0	0	0	0	0	0	0	0	0
ENSONIG00000025527	GL831133.1;GL831133.1;GL831133.1	8284982;8286761;8289809	8285411;8286811;8290406	-;-;-	1079	0	0	0	0	0	0	0	0	0	0	0	0	0	0	0	0	0	0	0	0	0	0	0	0	0	0	0	0	0	0
ENSONIG00000026227	GL831133.1;GL831133.1;GL831133.1	8338254;8339933;8340837	8338945;8340010;8341177	+;+;+	1111	2	0	0	0	0	0	0	0	0	0	0	0	0	0	0	0	0	1	0	0	1	0	0	0	0	1	0	0	2	0
ENSONIG00000003163	GL831133.1;GL831133.1;GL831133.1	8344046;8347391;8347740	8347309;8347485;8347817	-;-;-	3437	546	804	398	759	765	810	613	792	628	693	535	455	484	696	922	657	690	772	496	503	668	536	552	442	1238	532	427	457	312	502
ENSONIG00000003166	GL831133.1;GL831133.1;GL831133.1;GL831133.1;GL831133.1;GL831133.1;GL831133.1;GL831133.1;GL831133.1;GL831133.1;GL831133.1;GL831133.1;GL831133.1;GL831133.1;GL831133.1;GL831133.1;GL831133.1;GL831133.1;GL831133.1	8348804;8348804;8349251;8349251;8350660;8350660;8351206;8351417;8351450;8351627;8351627;8351916;8351916;8353463;8353466;8353620;8353620;8353881;8353881	8349005;8349005;8349369;8349369;8350726;8350726;8351238;8351490;8351490;8351766;8351766;8352067;8352067;8353515;8353515;8353776;8353776;8354005;8354547	+;+;+;+;+;+;+;+;+;+;+;+;+;+;+;+;+;+;+	1664	1278	1792	806	1574	1802	2397	999	2047	1525	1289	1752	1049	1644	1717	2133	1468	1549	1262	967	1181	1252	1369	1622	1397	1585	1364	1230	1206	747	1174
ENSONIG00000003171	GL831133.1;GL831133.1;GL831133.1;GL831133.1;GL831133.1;GL831133.1;GL831133.1;GL831133.1;GL831133.1;GL831133.1;GL831133.1;GL831133.1;GL831133.1;GL831133.1;GL831133.1	8379156;8379777;8379970;8380373;8380602;8381047;8382253;8382567;8383151;8383304;8383578;8383787;8384128;8384452;8386474	8379220;8379954;8380047;8380563;8380673;8381125;8382375;8382683;8383193;8383410;8383696;8384049;8384227;8384729;8386601	+;+;+;+;+;+;+;+;+;+;+;+;+;+;+	1941	215	386	130	263	258	390	214	274	212	272	224	189	218	318	344	191	318	211	188	247	212	254	235	221	206	180	179	159	105	181
ENSONIG00000003175	GL831133.1;GL831133.1;GL831133.1;GL831133.1;GL831133.1;GL831133.1;GL831133.1;GL831133.1;GL831133.1;GL831133.1	8392058;8395195;8395859;8397130;8397384;8397601;8397846;8398445;8399175;8399454	8392409;8395777;8395984;8397274;8397507;8397704;8397942;8398594;8399358;8400361	+;+;+;+;+;+;+;+;+;+	2773	91	66	94	184	156	124	26	46	26	128	108	39	112	62	99	106	40	66	29	127	40	39	73	75	60	26	96	62	91	84
ENSONIG00000023598	GL831133.1;GL831133.1;GL831133.1;GL831133.1;GL831133.1;GL831133.1	8412741;8413045;8414768;8414984;8415247;8415609	8412857;8413167;8414846;8415026;8415433;8416136	-;-;-;-;-;-	1077	24	49	18	38	50	54	31	26	37	41	56	32	45	36	56	46	38	37	25	36	32	39	29	20	49	35	43	20	19	18
ENSONIG00000003184	GL831133.1;GL831133.1;GL831133.1;GL831133.1;GL831133.1	8419284;8420784;8421550;8423094;8424805	8419423;8420916;8421756;8423423;8424993	-;-;-;-;-	999	712	1304	577	1002	961	1408	793	1202	847	847	979	659	901	1117	1390	1006	1227	897	687	767	850	887	921	886	1701	919	779	829	509	757
ENSONIG00000003185	GL831133.1;GL831133.1;GL831133.1;GL831133.1;GL831133.1;GL831133.1;GL831133.1;GL831133.1;GL831133.1;GL831133.1;GL831133.1;GL831133.1;GL831133.1;GL831133.1;GL831133.1	8427759;8427960;8428454;8428495;8429153;8429153;8431420;8431496;8431496;8432491;8432491;8432678;8432696;8432822;8432822	8427871;8428288;8428556;8428556;8429427;8429427;8431431;8431614;8431614;8432585;8432585;8432732;8432732;8432902;8432917	-;-;-;-;-;-;-;-;-;-;-;-;-;-;-	1197	75	127	50	54	87	38	35	72	89	136	52	31	80	60	99	52	38	61	58	70	53	169	123	84	55	85	76	60	31	108
ENSONIG00000026724	GL831133.1;GL831133.1;GL831133.1;GL831133.1;GL831133.1;GL831133.1	8453102;8454471;8454780;8458590;8458779;8458917	8453242;8454578;8454864;8458641;8458811;8459115	-;-;-;-;-;-	618	0	0	0	0	0	0	0	3	0	0	7	0	1	3	0	0	0	0	0	0	0	0	1	0	0	2	0	0	0	0
ENSONIG00000003188	GL831133.1;GL831133.1;GL831133.1;GL831133.1;GL831133.1;GL831133.1;GL831133.1;GL831133.1	8520368;8520539;8521804;8522782;8524803;8525161;8525479;8526624	8520493;8520698;8521806;8522887;8525083;8525276;8525585;8526709	-;-;-;-;-;-;-;-	985	0	1	0	0	0	0	0	0	0	0	0	0	0	0	0	0	0	0	0	0	0	0	0	1	5	0	4	0	2	1
ENSONIG00000022937	GL831133.1;GL831133.1;GL831133.1;GL831133.1;GL831133.1;GL831133.1;GL831133.1	8527696;8528035;8528340;8528828;8529105;8529996;8531216	8527865;8528157;8528490;8528987;8529326;8530055;8531280	-;-;-;-;-;-;-	951	0	0	0	0	0	0	0	0	0	0	0	0	0	0	0	0	0	0	0	0	0	0	0	0	0	0	0	0	0	0
ENSONIG00000026381	GL831133.1;GL831133.1	8574755;8575383	8574948;8575850	-;-	662	1	0	0	0	0	0	0	0	0	0	0	0	0	0	0	0	0	0	0	0	0	1	0	0	0	0	0	0	0	0
ENSONIG00000021879	GL831133.1	8580034	8580152	-	119	0	0	0	0	0	0	0	0	0	0	0	0	0	0	0	0	0	0	0	0	0	0	0	0	0	0	0	0	0	0
ENSONIG00000003189	GL831133.1;GL831133.1;GL831133.1;GL831133.1;GL831133.1;GL831133.1;GL831133.1;GL831133.1;GL831133.1;GL831133.1	8592065;8593467;8593679;8595057;8595450;8595621;8596224;8599871;8600137;8600323	8592077;8593557;8593826;8595186;8595540;8595889;8596339;8599968;8600182;8600424	-;-;-;-;-;-;-;-;-;-	1104	0	0	0	0	0	0	0	0	0	0	0	0	0	0	0	0	0	0	0	0	0	0	0	0	0	0	1	0	0	2
ENSONIG00000023835	GL831133.1;GL831133.1	8649745;8650524	8650115;8651905	+;+	1753	68	93	27	84	69	74	63	99	32	116	47	36	82	61	47	49	85	40	42	24	58	51	87	91	80	73	57	42	46	60
ENSONIG00000023669	GL831133.1;GL831133.1	8660949;8668737	8661068;8669734	-;-	1118	0	0	0	0	0	0	0	0	0	0	0	0	0	0	0	0	0	0	0	0	0	0	0	0	0	0	0	0	0	0
ENSONIG00000024471	GL831133.1;GL831133.1	8722163;8722996	8722638;8723225	-;-	706	0	2	0	0	0	1	0	0	0	2	0	0	0	2	0	0	0	0	1	0	0	0	1	1	2	1	0	1	0	1
ENSONIG00000024564	GL831133.1;GL831133.1	8906029;8909176	8906465;8909359	-;-	621	0	0	0	0	0	0	0	0	0	0	0	0	0	0	0	0	0	0	0	0	0	0	0	0	0	0	0	0	0	0
ENSONIG00000003191	GL831133.1;GL831133.1;GL831133.1;GL831133.1;GL831133.1;GL831133.1;GL831133.1;GL831133.1;GL831133.1;GL831133.1	9003430;9014124;9015159;9015599;9021380;9021695;9024610;9029876;9032014;9033729	9004388;9014272;9015281;9015906;9021541;9021891;9024748;9030026;9032132;9034231	+;+;+;+;+;+;+;+;+;+	2810	59	67	31	61	82	71	72	52	40	64	44	48	75	55	46	44	35	46	14	44	30	42	73	69	36	45	27	43	21	28
ENSONIG00000003199	GL831133.1;GL831133.1;GL831133.1;GL831133.1;GL831133.1;GL831133.1;GL831133.1;GL831133.1	9093418;9095155;9096491;9096795;9097173;9097346;9100267;9101400	9095002;9095286;9096695;9097008;9097263;9097568;9100373;9101751	-;-;-;-;-;-;-;-	2909	343	397	221	367	331	544	349	515	403	341	407	256	384	444	396	369	507	354	326	421	300	431	303	309	164	362	264	396	186	373
ENSONIG00000003205	GL831133.1;GL831133.1;GL831133.1;GL831133.1;GL831133.1;GL831133.1;GL831133.1;GL831133.1;GL831133.1;GL831133.1;GL831133.1;GL831133.1;GL831133.1;GL831133.1;GL831133.1;GL831133.1;GL831133.1;GL831133.1;GL831133.1;GL831133.1;GL831133.1;GL831133.1;GL831133.1;GL831133.1;GL831133.1;GL831133.1;GL831133.1;GL831133.1;GL831133.1;GL831133.1;GL831133.1	9122127;9149952;9150820;9180460;9180461;9181385;9181385;9182530;9182530;9187111;9187111;9187855;9187855;9188052;9188052;9189417;9189417;9190032;9190032;9190709;9190864;9193208;9193743;9193743;9194387;9194387;9195102;9195102;9195305;9195552;9195819	9122946;9150013;9150893;9180545;9180545;9181476;9181476;9182604;9182604;9187268;9187268;9187962;9187962;9188149;9188149;9189693;9189693;9190106;9190106;9190760;9190921;9193292;9193925;9193925;9194552;9194552;9195262;9195970;9195533;9195755;9195970	+;+;+;+;+;+;+;+;+;+;+;+;+;+;+;+;+;+;+;+;+;+;+;+;+;+;+;+;+;+;+	3338	4248	5379	2674	4467	4919	6007	3677	4450	4419	5218	4621	3320	4829	5001	5169	4354	3744	3167	2468	3189	4078	5080	4968	5502	1513	3249	2973	3008	2316	3347
ENSONIG00000003208	GL831133.1;GL831133.1;GL831133.1;GL831133.1;GL831133.1;GL831133.1;GL831133.1;GL831133.1;GL831133.1;GL831133.1;GL831133.1;GL831133.1;GL831133.1;GL831133.1;GL831133.1;GL831133.1;GL831133.1;GL831133.1;GL831133.1;GL831133.1;GL831133.1;GL831133.1;GL831133.1;GL831133.1;GL831133.1;GL831133.1;GL831133.1;GL831133.1;GL831133.1;GL831133.1;GL831133.1;GL831133.1;GL831133.1;GL831133.1;GL831133.1;GL831133.1;GL8…	9356319;9436434;9437772;9440942;9448237;9454998;9473234;9487881;9496024;9496817;9497497;9499084;9502380;9507227;9507578;9515465;9525888;9526089;9527983;9530309;9531810;9532361;9534266;9539443;9551282;9562761;9578493;9593006;9596757;9598255;9605407;9608948;9622455;9630329;9639294;9668432;9669736;9669966	9357557;9436631;9437997;9441146;9448348;9455247;9473376;9488053;9496192;9496987;9497669;9499251;9502629;9507354;9507764;9515608;9526008;9526251;9528651;9530500;9532253;9532691;9534359;9539627;9551517;9563038;9578707;9593133;9596878;9598378;9605587;9609114;9622719;9630509;9639538;9668586;9669788;9670338	+;+;+;+;+;+;+;+;+;+;+;+;+;+;+;+;+;+;+;+;+;+;+;+;+;+;+;+;+;+;+;+;+;+;+;+;+;+	8858	555	876	260	516	589	872	309	475	566	833	575	430	618	604	490	497	644	441	413	295	351	640	709	741	232	484	548	470	341	411
ENSONIG00000003211	GL831133.1;GL831133.1;GL831133.1;GL831133.1;GL831133.1;GL831133.1;GL831133.1;GL831133.1;GL831133.1;GL831133.1;GL831133.1;GL831133.1;GL831133.1;GL831133.1;GL831133.1;GL831133.1;GL831133.1;GL831133.1;GL831133.1;GL831133.1;GL831133.1;GL831133.1;GL831133.1;GL831133.1;GL831133.1;GL831133.1;GL831133.1;GL831133.1;GL831133.1;GL831133.1;GL831133.1;GL831133.1;GL831133.1;GL831133.1;GL831133.1;GL831133.1;GL8…	9679407;9679452;9681758;9681758;9688719;9689957;9689957;9701496;9701496;9701910;9701910;9703608;9703608;9707406;9707406;9710308;9710308;9712985;9712985;9713272;9713272;9717461;9717461;9722921;9722921;9723248;9723248;9726339;9726339;9727074;9727074;9739197;9739197;9741838;9750706;9762541;9763248	9679610;9679610;9681902;9681916;9688732;9690089;9690089;9701578;9701578;9701966;9701966;9703719;9703719;9707534;9707537;9710466;9710466;9713058;9713058;9713373;9713373;9717592;9717592;9723055;9723055;9723371;9723371;9726484;9726484;9727195;9727195;9739287;9739287;9741978;9750833;9762667;9763602	-;-;-;-;-;-;-;-;-;-;-;-;-;-;-;-;-;-;-;-;-;-;-;-;-;-;-;-;-;-;-;-;-;-;-;-;-	2730	702	1151	574	766	693	831	590	638	564	880	783	485	819	762	636	757	627	441	438	639	741	802	731	897	379	446	424	688	302	516
ENSONIG00000003218	GL831133.1;GL831133.1;GL831133.1;GL831133.1;GL831133.1;GL831133.1;GL831133.1;GL831133.1;GL831133.1;GL831133.1	9780245;9780565;9780736;9782238;9804421;9804633;9806723;9807021;9807947;9808808	9780434;9780683;9780805;9782372;9804531;9804757;9806966;9807871;9808762;9808921	-;-;-;-;-;-;-;-;-;-	2775	78	96	63	112	106	94	80	82	88	71	65	45	82	134	132	112	51	70	54	71	55	82	122	105	44	71	63	47	45	84
ENSONIG00000003220	GL831133.1;GL831133.1;GL831133.1;GL831133.1;GL831133.1;GL831133.1;GL831133.1;GL831133.1;GL831133.1;GL831133.1;GL831133.1;GL831133.1;GL831133.1;GL831133.1;GL831133.1;GL831133.1;GL831133.1;GL831133.1;GL831133.1;GL831133.1;GL831133.1;GL831133.1;GL831133.1;GL831133.1;GL831133.1;GL831133.1;GL831133.1;GL831133.1;GL831133.1;GL831133.1	9820578;9821663;9822300;9822364;9822644;9823303;9824510;9825071;9825071;9826133;9826133;9826471;9826471;9827482;9827781;9827808;9828583;9828909;9828909;9829130;9829401;9829889;9829889;9830192;9830192;9831415;9831436;9831742;9831745;9847923	9820593;9821981;9823410;9822498;9822661;9823410;9824530;9825262;9825262;9826378;9826378;9826695;9826679;9827488;9828114;9827995;9828608;9829799;9829063;9829304;9829799;9830062;9830062;9830427;9830433;9831662;9831662;9831867;9831872;9848853	-;-;-;-;-;-;-;-;-;-;-;-;-;-;-;-;-;-;-;-;-;-;-;-;-;-;-;-;-;-	5114	17	37	13	18	35	36	15	10	17	38	19	29	31	27	52	22	42	21	14	10	38	11	32	33	44	14	10	18	15	9
ENSONIG00000003225	GL831133.1;GL831133.1;GL831133.1;GL831133.1;GL831133.1;GL831133.1;GL831133.1;GL831133.1;GL831133.1;GL831133.1;GL831133.1;GL831133.1;GL831133.1;GL831133.1;GL831133.1;GL831133.1;GL831133.1;GL831133.1;GL831133.1;GL831133.1;GL831133.1;GL831133.1;GL831133.1;GL831133.1;GL831133.1;GL831133.1;GL831133.1;GL831133.1;GL831133.1;GL831133.1;GL831133.1;GL831133.1;GL831133.1;GL831133.1;GL831133.1;GL831133.1;GL8…	9871483;9872550;9875295;9875295;9875515;9875515;9875725;9875725;9877943;9877943;9881157;9881157;9882089;9882089;9882215;9882215;9882484;9882484;9882712;9882712;9883219;9883219;9883431;9883431;9883718;9883718;9883919;9883919;9884197;9884197;9884370;9884370;9884533;9884533;9884789;9884789;9886189;9886189;9887722;9887722;9888152;9888152;9888372;9888372;9888612;9888612;9888942;9888942;9889376;9889376…	9872651;9872651;9875378;9875378;9875638;9875638;9875816;9875816;9878057;9878057;9881280;9881280;9882134;9882134;9882378;9882378;9882559;9882559;9882825;9882825;9883300;9883300;9883561;9883561;9883831;9883831;9884030;9884030;9884266;9884266;9884451;9884451;9884673;9884673;9884930;9884930;9886424;9886424;9887848;9887848;9888285;9888285;9888497;9888497;9888761;9888761;9889046;9889046;9889765;9889765…	-;-;-;-;-;-;-;-;-;-;-;-;-;-;-;-;-;-;-;-;-;-;-;-;-;-;-;-;-;-;-;-;-;-;-;-;-;-;-;-;-;-;-;-;-;-;-;-;-;-;-;-;-;-;-;-;-;-;-;-;-;-;-;-;-;-;-;-;-;-;-;-;-;-;-;-;-;-;-;-;-;-;-;-;-;-;-;-;-;-;-;-;-;-;-;-;-;-;-;-;-;-;-;-;-;-;-;-;-;-;-;-;-;-;-;-;-;-;-;-;-;-;-;-;-;-;-;-	12552	1352	2210	740	1499	1351	1922	1059	1282	1234	1625	1831	1178	1480	1975	1499	1399	1310	950	816	745	1506	1940	1894	2268	883	1146	1514	873	871	1165
ENSONIG00000003236	GL831133.1;GL831133.1;GL831133.1	9925244;9925937;9926141	9925382;9926034;9926332	+;+;+	429	9	24	9	15	18	28	5	18	27	9	31	18	7	14	38	20	30	36	11	13	25	26	23	62	37	15	14	21	11	7
ENSONIG00000003237	GL831133.1;GL831133.1;GL831133.1;GL831133.1;GL831133.1;GL831133.1;GL831133.1	9925789;9927536;9927921;9928188;9928455;9928628;9929234	9927223;9927669;9928101;9928266;9928534;9928731;9929362	-;-;-;-;-;-;-	2142	39	83	49	89	52	108	45	53	96	62	105	82	67	97	170	75	66	107	27	62	95	61	105	86	108	54	50	52	33	35
ENSONIG00000003245	GL831133.1;GL831133.1;GL831133.1;GL831133.1;GL831133.1;GL831133.1;GL831133.1;GL831133.1;GL831133.1;GL831133.1;GL831133.1;GL831133.1;GL831133.1;GL831133.1;GL831133.1;GL831133.1;GL831133.1;GL831133.1	9934457;9934457;9934493;9934931;9935316;9935583;9945397;9945397;9945778;9945778;9946042;9946042;9946529;9946529;9946689;9946689;9946985;9947164	9934618;9934618;9934618;9935064;9935496;9935603;9945530;9945530;9945961;9945961;9946123;9946123;9946608;9946608;9946815;9946815;9947004;9947207	-;-;-;-;-;-;-;-;-;-;-;-;-;-;-;-;-;-	1169	0	0	0	0	0	0	0	0	0	0	0	0	0	0	0	0	0	0	0	0	0	0	0	0	0	0	0	0	0	0
ENSONIG00000003247	GL831133.1;GL831133.1;GL831133.1;GL831133.1;GL831133.1;GL831133.1;GL831133.1;GL831133.1	9961507;9961808;9962036;9963900;9963900;9975522;9975522;9976163	9962512;9961990;9962512;9963965;9963965;9977635;9975782;9976234	+;+;+;+;+;+;+;+	3186	54	177	84	174	148	183	99	150	55	119	104	57	80	138	147	95	138	75	57	52	126	150	118	90	70	44	48	48	65	131
ENSONIG00000003250	GL831133.1;GL831133.1;GL831133.1;GL831133.1;GL831133.1;GL831133.1;GL831133.1;GL831133.1;GL831133.1;GL831133.1;GL831133.1;GL831133.1;GL831133.1;GL831133.1;GL831133.1;GL831133.1;GL831133.1;GL831133.1;GL831133.1;GL831133.1;GL831133.1;GL831133.1;GL831133.1;GL831133.1;GL831133.1;GL831133.1;GL831133.1	9981887;9984373;9985010;9985399;9987637;9988269;9988690;9990250;9991449;9991871;9992088;9992454;9992857;9993227;9993418;9993841;9995329;9995617;9995954;9996440;9999106;9999528;10000326;10000615;10000837;10001134;10002543	9984284;9984749;9985142;9985604;9987781;9988289;9988864;9990501;9991577;9992017;9992216;9992682;9993149;9993256;9993558;9993891;9995463;9995781;9996054;9996512;9999229;9999702;10000497;10000739;10001050;10001326;10002616	-;-;-;-;-;-;-;-;-;-;-;-;-;-;-;-;-;-;-;-;-;-;-;-;-;-;-	6407	0	10	3	0	2	0	10	0	2	5	2	0	2	0	22	2	13	2	0	6	2	0	4	4	0	4	0	0	0	0
ENSONIG00000021523	GL831133.1	10000155	10000247	-	93	0	0	0	0	0	0	0	0	0	0	0	0	0	0	0	0	0	0	0	0	0	0	0	0	0	0	0	0	0	0
ENSONIG00000025631	GL831133.1;GL831133.1	10004334;10004593	10004489;10005620	+;+	1184	0	0	1	0	0	0	0	0	0	0	0	0	0	0	0	0	0	0	0	0	0	0	0	0	0	0	1	0	0	0
ENSONIG00000003262	GL831133.1;GL831133.1;GL831133.1	10013113;10016446;10018020	10013301;10016599;10018207	-;-;-	531	4	39	20	13	3	10	6	46	15	11	11	17	28	17	23	37	13	2	4	2	23	10	18	27	8	40	17	8	2	5
ENSONIG00000003263	GL831133.1;GL831133.1;GL831133.1;GL831133.1;GL831133.1;GL831133.1;GL831133.1;GL831133.1;GL831133.1;GL831133.1;GL831133.1;GL831133.1;GL831133.1;GL831133.1;GL831133.1;GL831133.1	10032382;10032954;10033202;10034163;10034698;10034909;10035008;10036249;10036448;10037674;10039203;10039899;10043874;10045280;10046496;10048748	10032536;10032977;10033214;10034183;10034736;10034977;10035026;10036337;10036563;10037829;10039327;10040000;10044049;10045631;10046760;10048859	-;-;-;-;-;-;-;-;-;-;-;-;-;-;-;-	1833	217	300	106	261	237	396	155	205	195	263	226	160	212	275	271	264	267	211	125	202	231	249	243	250	189	169	225	170	90	161
ENSONIG00000025029	GL831133.1;GL831133.1	10054799;10061328	10054893;10061450	+;+	218	0	0	0	0	0	0	1	0	0	0	0	0	0	0	0	0	0	0	0	0	0	0	0	0	0	0	1	0	0	0
ENSONIG00000003266	GL831133.1;GL831133.1;GL831133.1;GL831133.1;GL831133.1	10119583;10129506;10132823;10134116;10136680	10119862;10129718;10133008;10134253;10139509	+;+;+;+;+	3647	209	533	212	383	278	431	327	652	574	676	255	270	315	288	476	457	537	605	356	361	270	423	350	372	253	371	722	355	195	343
ENSONIG00000023399	GL831133.1;GL831133.1;GL831133.1;GL831133.1	10140401;10141681;10147642;10148566	10140584;10142291;10147762;10148665	-;-;-;-	1016	1	0	0	0	1	0	0	0	1	0	0	0	0	0	0	0	1	0	0	2	0	0	0	0	2	1	1	0	0	0
ENSONIG00000022955	GL831133.1;GL831133.1	10146863;10147373	10147094;10147877	+;+	737	0	1	0	0	1	2	0	0	1	0	0	0	0	0	0	0	0	0	0	2	0	0	1	2	0	1	0	0	0	0
ENSONIG00000003267	GL831133.1;GL831133.1;GL831133.1;GL831133.1;GL831133.1;GL831133.1;GL831133.1;GL831133.1;GL831133.1;GL831133.1;GL831133.1;GL831133.1;GL831133.1	10149121;10150862;10151229;10152152;10152152;10152943;10152943;10153226;10153226;10154665;10154665;10154959;10154959	10150359;10150885;10151286;10152347;10152347;10153090;10153090;10153337;10153337;10154699;10154699;10155009;10155249	-;-;-;-;-;-;-;-;-;-;-;-;-	2103	193	245	145	338	224	377	211	315	275	219	299	178	313	290	334	230	225	157	156	180	275	227	297	286	336	250	178	202	130	226
ENSONIG00000003269	GL831133.1;GL831133.1;GL831133.1;GL831133.1;GL831133.1;GL831133.1;GL831133.1;GL831133.1;GL831133.1;GL831133.1;GL831133.1	10156224;10157618;10157861;10158546;10158752;10161490;10162367;10163088;10163236;10164105;10164773	10156482;10157683;10157944;10158660;10158939;10161623;10162469;10163152;10163320;10164257;10165407	+;+;+;+;+;+;+;+;+;+;+	1887	1061	1420	650	1399	1470	2223	1255	1621	1144	961	1979	1027	1330	1480	2272	1358	1580	1240	978	1014	1245	1233	1375	1341	2152	1299	1039	937	677	988
ENSONIG00000003271	GL831133.1;GL831133.1;GL831133.1;GL831133.1;GL831133.1;GL831133.1;GL831133.1;GL831133.1	10171091;10180188;10180402;10181087;10184496;10184870;10185020;10185291	10171648;10180248;10180462;10181164;10184585;10184935;10185070;10185380	+;+;+;+;+;+;+;+	1055	71	140	50	89	86	101	69	109	57	94	105	71	83	96	171	88	107	69	48	85	95	113	114	103	50	84	68	70	67	77
ENSONIG00000003274	GL831133.1;GL831133.1;GL831133.1;GL831133.1;GL831133.1;GL831133.1;GL831133.1;GL831133.1;GL831133.1;GL831133.1;GL831133.1;GL831133.1;GL831133.1;GL831133.1;GL831133.1;GL831133.1;GL831133.1;GL831133.1;GL831133.1;GL831133.1;GL831133.1;GL831133.1;GL831133.1;GL831133.1;GL831133.1;GL831133.1;GL831133.1;GL831133.1;GL831133.1	10190512;10190768;10190947;10191180;10191377;10191639;10192852;10193168;10193360;10193667;10193970;10203521;10203824;10204969;10205717;10206392;10206593;10207902;10208080;10208393;10208743;10209035;10209661;10209901;10210651;10211393;10212661;10213224;10214912	10190633;10190871;10191088;10191299;10191557;10191809;10193076;10193266;10193585;10193930;10194598;10203712;10203946;10205256;10205815;10206508;10206670;10208010;10208203;10208472;10208808;10209116;10209688;10210016;10211353;10211571;10213181;10213357;10215112	-;-;-;-;-;-;-;-;-;-;-;-;-;-;-;-;-;-;-;-;-;-;-;-;-;-;-;-;-	5523	290	364	253	410	345	473	282	423	388	387	393	445	560	363	547	360	319	281	233	359	427	349	382	380	210	314	279	290	199	331
ENSONIG00000003278	GL831133.1;GL831133.1;GL831133.1;GL831133.1;GL831133.1;GL831133.1;GL831133.1;GL831133.1;GL831133.1;GL831133.1;GL831133.1;GL831133.1;GL831133.1;GL831133.1;GL831133.1;GL831133.1	10280262;10281663;10282045;10283577;10283924;10284200;10286714;10286935;10287089;10288872;10289488;10289964;10290217;10292483;10293614;10300339	10280878;10281788;10282114;10283726;10284050;10284291;10286840;10287005;10287178;10289074;10289708;10290141;10290295;10292646;10293916;10300693	-;-;-;-;-;-;-;-;-;-;-;-;-;-;-;-	2973	27	54	21	29	64	71	45	30	35	39	36	28	73	38	35	26	76	39	13	15	39	46	34	45	20	24	27	29	31	27
ENSONIG00000003289	GL831133.1;GL831133.1;GL831133.1;GL831133.1;GL831133.1;GL831133.1;GL831133.1;GL831133.1;GL831133.1;GL831133.1;GL831133.1;GL831133.1;GL831133.1;GL831133.1;GL831133.1;GL831133.1;GL831133.1;GL831133.1;GL831133.1;GL831133.1;GL831133.1;GL831133.1;GL831133.1;GL831133.1;GL831133.1;GL831133.1;GL831133.1;GL831133.1;GL831133.1;GL831133.1;GL831133.1;GL831133.1;GL831133.1;GL831133.1;GL831133.1;GL831133.1;GL8…	10305401;10307016;10307946;10308851;10309175;10309414;10311256;10311535;10311817;10312420;10313269;10313659;10313895;10314492;10314892;10315006;10315560;10316034;10316326;10316709;10317095;10317344;10318338;10319057;10319509;10320127;10320751;10321689;10321913;10322197;10322384;10323421;10329227;10333937;10340405;10342751;10353710	10305480;10307156;10308177;10309074;10309334;10309575;10311375;10311717;10311972;10312989;10313331;10313780;10314029;10314655;10314933;10315068;10315703;10316176;10316457;10316745;10317121;10317368;10318423;10319146;10319551;10320191;10321217;10321832;10322007;10322308;10322478;10323526;10329249;10333981;10340469;10342857;10353941	-;-;-;-;-;-;-;-;-;-;-;-;-;-;-;-;-;-;-;-;-;-;-;-;-;-;-;-;-;-;-;-;-;-;-;-;-	4900	13	65	21	30	39	45	22	19	36	40	62	20	37	33	33	28	28	22	18	19	32	66	44	43	14	32	14	16	22	10
ENSONIG00000003297	GL831133.1;GL831133.1;GL831133.1;GL831133.1;GL831133.1;GL831133.1;GL831133.1;GL831133.1;GL831133.1;GL831133.1;GL831133.1;GL831133.1;GL831133.1;GL831133.1;GL831133.1;GL831133.1;GL831133.1;GL831133.1;GL831133.1;GL831133.1;GL831133.1;GL831133.1;GL831133.1;GL831133.1;GL831133.1;GL831133.1;GL831133.1	10355777;10356923;10357577;10358136;10358136;10360744;10360744;10361026;10362769;10362771;10363629;10363629;10363629;10363657;10363979;10364656;10364656;10364656;10364656;10365171;10365734;10365734;10365734;10366641;10366686;10367226;10368371	10356278;10357096;10357619;10358309;10358309;10360917;10360917;10361202;10362942;10362942;10363802;10363802;10363802;10363665;10363994;10365653;10365653;10365149;10366497;10365653;10365997;10366504;10366494;10366747;10366713;10367341;10368504	-;-;-;-;-;-;-;-;-;-;-;-;-;-;-;-;-;-;-;-;-;-;-;-;-;-;-	3814	68	137	49	35	65	86	54	119	71	59	45	56	83	90	86	27	99	42	39	26	69	42	52	57	92	91	21	67	21	65
ENSONIG00000020606	GL831133.1	10422274	10422765	-	492	173	243	113	250	242	371	217	322	225	182	210	178	239	229	344	185	251	240	137	187	177	196	199	218	248	283	204	192	105	185
ENSONIG00000003300	GL831133.1;GL831133.1	10429402;10430593	10430285;10430599	+;+	891	61	128	77	74	107	118	71	102	80	68	102	81	154	113	166	90	124	78	77	70	63	84	154	132	164	104	106	69	36	58
ENSONIG00000003302	GL831133.1;GL831133.1;GL831133.1;GL831133.1;GL831133.1;GL831133.1;GL831133.1;GL831133.1;GL831133.1;GL831133.1;GL831133.1;GL831133.1;GL831133.1;GL831133.1;GL831133.1;GL831133.1;GL831133.1;GL831133.1;GL831133.1;GL831133.1;GL831133.1;GL831133.1;GL831133.1;GL831133.1;GL831133.1;GL831133.1;GL831133.1;GL831133.1;GL831133.1;GL831133.1;GL831133.1;GL831133.1;GL831133.1;GL831133.1;GL831133.1;GL831133.1;GL8…	10618124;10618186;10619661;10619661;10621228;10621228;10621607;10621607;10621903;10621903;10622485;10622485;10622678;10622678;10622997;10622997;10623491;10623491;10623647;10623647;10624059;10624059;10624645;10624645;10624912;10624912;10625129;10625129;10625492;10625699;10626087;10626087;10626278;10626376;10626376;10626644;10626795;10626809;10627195;10627228;10627393;10627393;10627953;10627953	10618258;10618258;10619795;10619795;10621313;10621313;10621767;10621767;10622000;10622000;10622543;10622543;10622920;10622920;10623144;10623144;10623570;10623570;10623863;10623863;10624355;10624355;10624823;10624823;10625039;10625039;10625217;10625217;10625523;10625705;10626214;10626298;10626310;10626621;10626697;10626697;10626869;10626869;10627310;10627310;10627502;10627502;10627980;10628068	+;+;+;+;+;+;+;+;+;+;+;+;+;+;+;+;+;+;+;+;+;+;+;+;+;+;+;+;+;+;+;+;+;+;+;+;+;+;+;+;+;+;+;+	3057	208	312	122	249	331	471	189	400	337	216	372	234	332	271	478	286	383	233	258	184	272	308	268	297	263	336	237	208	123	208
ENSONIG00000003311	GL831133.1;GL831133.1;GL831133.1;GL831133.1;GL831133.1;GL831133.1;GL831133.1;GL831133.1;GL831133.1;GL831133.1	10629096;10629316;10630446;10630858;10631024;10631138;10631350;10631777;10632498;10632736	10629232;10629517;10630530;10631021;10631122;10631254;10631540;10631835;10632641;10633178	-;-;-;-;-;-;-;-;-;-	1641	0	0	0	11	6	23	10	5	10	18	0	12	6	9	40	29	11	10	13	0	1	0	1	8	13	0	20	0	5	5
ENSONIG00000003313	GL831133.1;GL831133.1;GL831133.1;GL831133.1;GL831133.1;GL831133.1;GL831133.1;GL831133.1;GL831133.1;GL831133.1;GL831133.1;GL831133.1	10654038;10654603;10657315;10658238;10658478;10658697;10659035;10659754;10659929;10661181;10661390;10661719	10654082;10654713;10657403;10658301;10658616;10658826;10659222;10659836;10659997;10661279;10661555;10663502	+;+;+;+;+;+;+;+;+;+;+;+	2967	1	1	0	1	0	1	1	0	0	2	0	1	2	3	5	0	0	3	1	2	1	2	0	0	0	1	7	2	1	0
ENSONIG00000003314	GL831133.1;GL831133.1;GL831133.1;GL831133.1;GL831133.1;GL831133.1;GL831133.1;GL831133.1;GL831133.1;GL831133.1;GL831133.1;GL831133.1;GL831133.1;GL831133.1;GL831133.1;GL831133.1;GL831133.1;GL831133.1;GL831133.1;GL831133.1;GL831133.1;GL831133.1;GL831133.1;GL831133.1;GL831133.1;GL831133.1;GL831133.1;GL831133.1;GL831133.1;GL831133.1;GL831133.1;GL831133.1;GL831133.1;GL831133.1;GL831133.1;GL831133.1;GL8…	10658205;10663198;10663881;10663881;10664104;10664104;10664317;10664317;10664737;10664737;10664990;10665059;10665059;10665442;10665442;10666007;10666007;10670403;10670403;10670826;10671127;10671127;10671429;10671429;10672193;10672193;10672461;10672461;10672804;10672804;10673222;10673222;10673431;10673431;10673606;10673606;10675118;10675118;10675575;10675575;10675784;10675784;10677075;10677075;106…	10663433;10663433;10664023;10664023;10664224;10664224;10664398;10664398;10664887;10664887;10665043;10665171;10665171;10665523;10665523;10666140;10666140;10670527;10670556;10670857;10671248;10671248;10671533;10671533;10672288;10672288;10672625;10672625;10672925;10672925;10673351;10673351;10673510;10673510;10673762;10673762;10675195;10675195;10675694;10675691;10675872;10675872;10677112;10677112;106…	-;-;-;-;-;-;-;-;-;-;-;-;-;-;-;-;-;-;-;-;-;-;-;-;-;-;-;-;-;-;-;-;-;-;-;-;-;-;-;-;-;-;-;-;-;-;-;-;-;-;-;-;-;-	8004	115	219	62	157	120	154	86	157	110	136	133	79	152	152	248	144	144	132	107	92	122	143	199	159	86	114	117	122	77	105
ENSONIG00000003319	GL831133.1;GL831133.1;GL831133.1;GL831133.1;GL831133.1;GL831133.1;GL831133.1;GL831133.1;GL831133.1	10680120;10680717;10680927;10681400;10681552;10684342;10684759;10685790;10686081	10680179;10680849;10681060;10681471;10681697;10684615;10684856;10685934;10686344	+;+;+;+;+;+;+;+;+	1326	208	382	165	240	295	524	203	373	238	202	361	211	327	311	475	231	303	278	202	252	260	322	313	265	480	330	251	298	127	206
ENSONIG00000003321	GL831133.1;GL831133.1;GL831133.1;GL831133.1;GL831133.1	10688529;10689274;10689529;10690884;10691672	10688746;10689442;10690353;10691091;10692000	-;-;-;-;-	1749	177	355	129	288	323	388	208	310	280	220	241	194	292	270	458	231	336	257	182	200	192	278	309	263	349	248	241	216	142	182
ENSONIG00000003323	GL831133.1;GL831133.1;GL831133.1;GL831133.1;GL831133.1;GL831133.1;GL831133.1;GL831133.1;GL831133.1;GL831133.1;GL831133.1;GL831133.1;GL831133.1;GL831133.1;GL831133.1;GL831133.1;GL831133.1;GL831133.1;GL831133.1	10701322;10701454;10701847;10702538;10702725;10703480;10704303;10705629;10705777;10706012;10706567;10707187;10707439;10708038;10708360;10708687;10711260;10711799;10712691	10701361;10701584;10701964;10702638;10702766;10703563;10704418;10705700;10705927;10706205;10706715;10707237;10707521;10708268;10708509;10708763;10711334;10711915;10712823	+;+;+;+;+;+;+;+;+;+;+;+;+;+;+;+;+;+;+	2115	123	223	99	130	194	228	132	210	146	186	150	123	143	175	278	193	195	156	104	100	84	154	163	160	136	141	148	120	91	143
ENSONIG00000003327	GL831133.1;GL831133.1;GL831133.1;GL831133.1;GL831133.1;GL831133.1;GL831133.1;GL831133.1;GL831133.1;GL831133.1;GL831133.1;GL831133.1;GL831133.1;GL831133.1;GL831133.1;GL831133.1;GL831133.1;GL831133.1;GL831133.1;GL831133.1;GL831133.1;GL831133.1;GL831133.1;GL831133.1;GL831133.1;GL831133.1;GL831133.1;GL831133.1;GL831133.1;GL831133.1;GL831133.1;GL831133.1;GL831133.1;GL831133.1;GL831133.1;GL831133.1;GL8…	10716162;10718986;10718993;10719252;10719264;10719490;10719490;10720142;10720142;10720525;10720525;10721201;10721201;10721480;10721480;10721807;10721807;10722546;10722546;10722835;10722860;10723564;10723564;10725662;10725662;10726003;10726003;10726366;10726366;10727375;10727375;10728116;10728310;10728680;10729142;10729175;10733916	10716184;10719115;10719115;10719398;10719398;10719719;10719719;10720271;10720271;10720648;10720648;10721331;10721331;10721584;10721584;10721988;10721988;10722632;10722657;10722990;10722990;10723711;10723711;10725835;10725835;10726248;10726284;10726515;10726515;10727449;10727440;10728195;10728466;10728715;10729258;10729317;10734036	-;-;-;-;-;-;-;-;-;-;-;-;-;-;-;-;-;-;-;-;-;-;-;-;-;-;-;-;-;-;-;-;-;-;-;-;-	2869	401	710	267	519	569	856	409	588	482	524	536	459	467	662	716	572	592	334	293	471	450	477	567	599	252	547	391	454	241	440
ENSONIG00000026757	GL831133.1;GL831133.1	10748367;10749164	10748945;10749338	+;+	754	0	0	0	0	0	0	0	0	0	0	0	0	0	0	0	0	0	0	0	0	0	0	0	0	0	0	0	0	0	0
ENSONIG00000003335	GL831133.1;GL831133.1;GL831133.1;GL831133.1;GL831133.1;GL831133.1;GL831133.1;GL831133.1;GL831133.1;GL831133.1;GL831133.1;GL831133.1;GL831133.1;GL831133.1;GL831133.1;GL831133.1;GL831133.1;GL831133.1;GL831133.1	10763475;10764897;10765059;10766238;10766727;10766925;10767107;10767321;10767575;10770364;10771452;10771596;10772704;10772844;10774343;10774440;10774532;10774831;10775067	10763720;10764964;10765309;10766384;10766845;10767008;10767204;10767480;10767716;10770486;10771516;10771682;10772754;10773052;10774379;10774507;10774576;10774979;10775107	-;-;-;-;-;-;-;-;-;-;-;-;-;-;-;-;-;-;-	2190	0	0	0	0	0	1	0	2	0	0	0	0	0	0	4	0	10	9	0	0	4	0	12	6	0	0	0	0	2	2
ENSONIG00000003339	GL831133.1;GL831133.1;GL831133.1;GL831133.1;GL831133.1;GL831133.1;GL831133.1;GL831133.1;GL831133.1;GL831133.1;GL831133.1;GL831133.1;GL831133.1	10806219;10809433;10810060;10811691;10815204;10815462;10815688;10816240;10816719;10817180;10817479;10817620;10817853	10806364;10809494;10810153;10811785;10815317;10815552;10815767;10816299;10816812;10817275;10817537;10817742;10818497	+;+;+;+;+;+;+;+;+;+;+;+;+	1759	47	93	35	101	41	120	58	98	72	74	106	60	81	92	107	95	68	97	30	65	84	104	97	94	138	112	113	51	53	55
ENSONIG00000026326	GL831133.1;GL831133.1;GL831133.1	10846308;10850397;10850931	10846775;10850434;10851616	+;+;+	1192	0	3	1	0	0	0	0	0	0	0	0	0	0	0	1	0	0	0	0	0	0	1	1	0	0	0	1	0	1	1
ENSONIG00000020607	GL831133.1	10873363	10874286	-	924	0	4	0	0	1	4	2	2	7	1	0	1	1	7	23	0	8	0	5	1	0	2	5	1	0	3	1	1	4	5
ENSONIG00000025998	GL831133.1;GL831133.1	10890301;10890625	10890543;10890850	+;+	469	0	4	0	0	0	0	0	0	0	0	0	0	0	0	0	0	0	0	0	0	0	0	0	0	0	0	0	0	0	0
ENSONIG00000025063	GL831133.1;GL831133.1;GL831133.1	10900537;10900702;10902510	10900607;10900771;10902607	-;-;-	239	0	0	0	0	0	0	0	0	0	0	0	0	0	0	0	0	0	0	0	0	0	0	0	0	0	0	0	0	0	0
ENSONIG00000003348	GL831133.1;GL831133.1;GL831133.1	10906268;10906994;10907670	10906880;10907580;10907890	-;-;-	1421	0	0	0	0	0	0	0	0	0	0	0	0	0	0	0	0	0	0	0	0	0	0	0	0	0	0	0	0	0	0
ENSONIG00000003349	GL831133.1;GL831133.1;GL831133.1;GL831133.1;GL831133.1;GL831133.1	10914524;10915082;10915684;10916013;10916190;10916851	10914595;10915089;10915686;10916106;10916347;10916950	+;+;+;+;+;+	435	46	87	41	67	71	97	61	97	68	59	142	53	85	77	135	90	68	58	37	68	70	80	72	70	113	60	63	65	51	54
ENSONIG00000003350	GL831133.1;GL831133.1;GL831133.1;GL831133.1;GL831133.1;GL831133.1;GL831133.1;GL831133.1;GL831133.1	10914956;10919092;10921288;10921458;10922073;10922274;10922554;10922755;10923011	10918831;10919162;10921377;10921731;10922173;10922467;10922663;10922861;10923171	-;-;-;-;-;-;-;-;-	4984	485	859	578	624	765	871	521	1014	908	739	829	491	668	519	1102	569	950	718	417	582	751	630	768	664	930	586	769	512	286	459
ENSONIG00000022032	GL831133.1	10928633	10928710	-	78	0	0	0	0	0	0	1	0	1	0	0	0	0	0	1	1	2	0	0	0	0	1	0	1	0	1	1	0	1	0
ENSONIG00000003353	GL831133.1;GL831133.1;GL831133.1;GL831133.1;GL831133.1;GL831133.1	10945456;10946760;10949120;10949410;10949608;10961564	10946601;10946975;10949276;10949522;10949916;10961773	-;-;-;-;-;-	2151	3	0	0	0	2	0	0	0	1	0	3	0	2	6	0	1	0	0	0	3	4	6	0	1	8	1	0	0	0	0
ENSONIG00000003355	GL831133.1;GL831133.1;GL831133.1;GL831133.1;GL831133.1;GL831133.1	10963368;10963410;10963743;10963743;10964380;10966100	10963638;10963638;10963897;10963897;10964418;10966147	-;-;-;-;-;-	513	0	0	0	0	0	0	0	0	0	0	0	0	0	0	0	0	0	0	0	0	1	0	0	4	0	0	0	0	0	0
ENSONIG00000003356	GL831133.1;GL831133.1;GL831133.1	10988708;10989314;10989602	10988758;10989504;10989845	+;+;+	486	8	15	3	14	0	9	1	19	5	19	4	3	6	7	0	8	11	12	1	9	6	17	12	8	14	5	11	16	4	5
ENSONIG00000003357	GL831133.1;GL831133.1;GL831133.1;GL831133.1;GL831133.1;GL831133.1	10993011;10993138;10993268;10994424;10995183;10995360	10993052;10993155;10993432;10994635;10995278;10995372	-;-;-;-;-;-	546	640	1022	450	835	851	1400	694	868	742	876	756	486	809	667	1007	857	901	890	535	639	504	551	776	683	1715	821	840	617	417	677
ENSONIG00000003361	GL831133.1;GL831133.1;GL831133.1;GL831133.1;GL831133.1;GL831133.1;GL831133.1;GL831133.1;GL831133.1;GL831133.1;GL831133.1;GL831133.1;GL831133.1	11002155;11005072;11005262;11005429;11007129;11007436;11007675;11008224;11008396;11013694;11013819;11014150;11014955	11004961;11005179;11005352;11005468;11007211;11007582;11007720;11008318;11008474;11013731;11013925;11014243;11015184	-;-;-;-;-;-;-;-;-;-;-;-;-	3965	235	384	138	277	337	435	270	366	283	232	387	225	256	297	446	288	283	270	164	201	260	299	331	307	272	289	241	180	116	245
ENSONIG00000003375	GL831133.1;GL831133.1;GL831133.1;GL831133.1	11043425;11048002;11048301;11048610	11046590;11048222;11048547;11048809	-;-;-;-	3834	12	23	16	17	3	7	17	22	17	7	16	9	22	19	14	9	9	4	16	12	12	9	11	15	16	9	8	7	6	9
ENSONIG00000022835	GL831133.1;GL831133.1	11069236;11072238	11069488;11073542	+;+	1558	4	16	1	10	8	10	2	12	1	14	15	1	12	7	14	14	14	11	10	5	2	6	13	8	10	15	7	6	2	3
ENSONIG00000026072	GL831133.1;GL831133.1;GL831133.1;GL831133.1	11083355;11083355;11084777;11087724	11084123;11084123;11085334;11087834	-;-;-;-	1438	40	53	30	52	39	32	28	44	59	30	80	38	34	44	53	45	38	46	22	30	37	57	49	61	66	49	42	35	8	30
ENSONIG00000003376	GL831133.1;GL831133.1;GL831133.1;GL831133.1;GL831133.1;GL831133.1	11090456;11091938;11092942;11094792;11095184;11096803	11090486;11092090;11093072;11094905;11095285;11097114	+;+;+;+;+;+	843	32	80	49	41	99	94	57	102	68	81	53	35	48	57	77	62	74	70	27	79	52	67	105	61	68	74	54	50	31	37
ENSONIG00000003379	GL831133.1;GL831133.1;GL831133.1;GL831133.1	11097947;11101344;11101486;11103071	11098753;11101399;11101658;11103161	+;+;+;+	1127	762	1331	572	1138	1212	1709	907	1362	982	863	1558	904	1262	1196	1895	1176	1307	1033	700	929	1089	1185	1232	1196	2076	1091	850	896	462	751
ENSONIG00000003384	GL831133.1;GL831133.1;GL831133.1;GL831133.1;GL831133.1	11102094;11106448;11106657;11109782;11110150	11105869;11106577;11106931;11110015;11110261	-;-;-;-;-	4527	960	1663	792	1287	1463	2048	1037	1833	1375	938	2244	1110	1535	1654	2841	1371	1530	1277	951	1278	1543	2020	1639	1821	3024	1436	1163	1245	496	976
ENSONIG00000026918	GL831133.1;GL831133.1;GL831133.1	11137610;11138675;11139426	11137726;11138723;11140304	-;-;-	1045	4	0	3	0	1	0	0	3	0	2	5	1	2	0	1	7	3	1	3	0	0	3	7	2	1	2	4	0	3	0
ENSONIG00000022619	GL831133.1;GL831133.1;GL831133.1;GL831133.1	11156564;11157598;11157912;11158429	11157353;11157834;11158043;11158536	+;+;+;+	1267	23	31	43	28	16	39	19	20	12	17	15	18	28	17	20	15	15	17	31	40	57	73	28	24	24	8	39	29	11	12
ENSONIG00000003385	GL831133.1;GL831133.1	11164550;11170185	11165386;11171024	-;-	1677	186	467	151	289	360	542	249	231	308	351	287	186	322	380	469	267	284	298	203	196	294	234	312	379	424	226	271	157	118	204
ENSONIG00000003387	GL831133.1;GL831133.1;GL831133.1;GL831133.1;GL831133.1;GL831133.1;GL831133.1	11195979;11197985;11198516;11198756;11198922;11199401;11199591	11196202;11198058;11198614;11198837;11199008;11199498;11199655	+;+;+;+;+;+;+	729	1529	2024	844	2311	2330	2239	1741	2406	1557	1896	3899	3704	3720	2914	3370	2744	1796	1572	974	1410	2963	3397	3748	4204	768	1749	1025	1418	966	1434
ENSONIG00000021857	GL831133.1	11198099	11198228	+	130	1	2	0	5	1	1	0	5	1	1	8	1	1	4	2	3	5	1	3	2	0	6	2	1	1	2	5	0	0	4
ENSONIG00000021574	GL831133.1	11199094	11199222	+	129	3	6	4	6	9	1	6	8	3	4	6	4	3	7	5	5	1	1	2	1	4	8	6	5	1	7	5	6	2	4
ENSONIG00000022440	GL831133.1;GL831133.1	11227837;11228581	11227976;11228906	+;+	466	1	0	3	8	0	1	0	3	2	0	12	0	5	12	1	8	0	4	0	5	0	4	7	1	1	3	5	0	0	3
ENSONIG00000003391	GL831133.1;GL831133.1;GL831133.1;GL831133.1;GL831133.1;GL831133.1	11353781;11355132;11357164;11357865;11358099;11358099	11356540;11356540;11357194;11357935;11358321;11358321	-;-;-;-;-;-	3085	876	1407	907	988	1158	1870	819	1434	1456	1251	1197	757	1012	1368	1396	973	1626	1220	960	1197	842	980	1191	1011	929	1339	1172	979	524	946
ENSONIG00000003394	GL831133.1;GL831133.1;GL831133.1;GL831133.1;GL831133.1;GL831133.1;GL831133.1;GL831133.1;GL831133.1;GL831133.1;GL831133.1;GL831133.1;GL831133.1;GL831133.1;GL831133.1;GL831133.1;GL831133.1;GL831133.1;GL831133.1;GL831133.1;GL831133.1;GL831133.1;GL831133.1;GL831133.1	11404414;11408725;11409759;11410566;11411701;11412052;11426787;11428698;11462705;11464018;11464722;11465029;11472662;11473013;11473714;11473911;11474284;11478088;11479108;11479428;11480037;11480697;11480863;11481391	11404602;11408909;11410279;11410770;11411827;11412181;11426934;11428829;11462840;11464181;11464748;11465159;11472761;11473036;11473812;11474047;11474363;11478211;11479322;11479559;11480170;11480781;11480930;11481586	-;-;-;-;-;-;-;-;-;-;-;-;-;-;-;-;-;-;-;-;-;-;-;-	3489	110	223	69	145	179	305	126	198	141	146	165	182	191	222	256	136	161	150	92	116	160	146	168	146	151	136	147	88	91	142
ENSONIG00000021959	GL831133.1	11430641	11430747	-	107	0	0	0	0	0	0	0	0	0	0	0	0	0	0	0	0	0	0	0	0	0	0	0	0	0	0	0	0	0	0
ENSONIG00000022054	GL831133.1	11432642	11432748	-	107	0	0	0	0	0	0	0	0	0	0	0	0	0	0	0	0	0	0	0	0	0	0	0	0	0	0	0	0	0	0
ENSONIG00000003406	GL831133.1;GL831133.1;GL831133.1;GL831133.1;GL831133.1;GL831133.1;GL831133.1;GL831133.1;GL831133.1;GL831133.1;GL831133.1;GL831133.1;GL831133.1;GL831133.1;GL831133.1;GL831133.1;GL831133.1;GL831133.1;GL831133.1;GL831133.1;GL831133.1;GL831133.1;GL831133.1;GL831133.1;GL831133.1;GL831133.1;GL831133.1;GL831133.1;GL831133.1;GL831133.1;GL831133.1;GL831133.1;GL831133.1;GL831133.1	11487372;11488695;11490215;11490399;11492693;11495243;11497227;11497431;11500296;11501696;11502993;11506426;11506633;11507030;11507460;11508504;11515097;11516842;11517110;11525680;11525889;11531396;11532372;11533251;11535616;11537189;11537426;11539382;11545471;11556815;11572787;11575421;11585213;11585388	11487478;11488909;11490318;11490603;11492876;11495479;11497352;11497613;11500433;11501820;11502998;11506621;11506815;11507396;11507831;11508526;11515250;11517021;11517320;11525809;11526172;11531480;11532519;11533461;11535666;11537327;11537537;11539539;11545545;11556941;11573023;11575466;11585340;11585438	-;-;-;-;-;-;-;-;-;-;-;-;-;-;-;-;-;-;-;-;-;-;-;-;-;-;-;-;-;-;-;-;-;-	5298	974	1830	720	1121	1249	2320	914	1258	1189	1347	1281	734	1116	1293	1496	1307	1440	1249	940	1028	1044	1459	1341	1605	531	1339	1055	967	525	959
ENSONIG00000025078	GL831133.1;GL831133.1	11585906;11589715	11589173;11589792	-;-	3346	11	61	23	9	13	32	8	19	59	52	18	3	13	15	23	12	7	5	3	6	21	49	48	38	22	4	40	9	6	20
ENSONIG00000003411	GL831133.1;GL831133.1;GL831133.1;GL831133.1;GL831133.1;GL831133.1;GL831133.1;GL831133.1;GL831133.1;GL831133.1;GL831133.1;GL831133.1;GL831133.1;GL831133.1;GL831133.1;GL831133.1;GL831133.1;GL831133.1;GL831133.1;GL831133.1;GL831133.1;GL831133.1	11682699;11682726;11684129;11684129;11684986;11684986;11685205;11685205;11685452;11685452;11685711;11685711;11686008;11686008;11687429;11687429;11687651;11687651;11687937;11687937;11688140;11690392	11683108;11683108;11684285;11684285;11685111;11685111;11685375;11685375;11685577;11685577;11685931;11685931;11686227;11686227;11687536;11687536;11687767;11687767;11688047;11688047;11688175;11690666	+;+;+;+;+;+;+;+;+;+;+;+;+;+;+;+;+;+;+;+;+;+	2078	352	579	215	483	527	944	399	555	391	376	569	347	493	458	754	444	560	438	326	360	412	441	547	510	622	480	394	412	222	368
ENSONIG00000003416	GL831133.1;GL831133.1;GL831133.1;GL831133.1	11692013;11693453;11694547;11696037	11692171;11693659;11694742;11696237	-;-;-;-	763	2	4	0	6	5	0	3	0	6	1	0	1	5	0	2	0	1	4	3	5	5	8	6	1	0	6	1	2	3	2
ENSONIG00000003417	GL831133.1;GL831133.1;GL831133.1;GL831133.1	11702281;11702652;11702817;11703402	11702603;11702744;11703344;11703438	+;+;+;+	981	0	1	0	0	0	0	0	0	0	1	0	0	0	4	0	0	0	0	0	2	0	0	0	2	0	2	0	2	0	0
ENSONIG00000003418	GL831133.1;GL831133.1;GL831133.1;GL831133.1;GL831133.1;GL831133.1;GL831133.1;GL831133.1;GL831133.1	11707287;11708862;11709566;11709862;11710627;11711653;11711897;11712220;11712507	11707489;11709094;11709669;11710020;11710760;11711796;11711969;11712280;11712559	-;-;-;-;-;-;-;-;-	1164	101	171	64	142	160	271	98	161	131	137	171	110	149	147	189	121	140	127	92	130	154	139	143	126	167	136	129	91	73	86
ENSONIG00000023954	GL831133.1;GL831133.1	11738936;11739730	11739162;11740938	+;+	1436	0	6	2	4	3	0	0	0	2	0	0	0	2	4	2	10	8	2	3	0	3	9	0	3	8	0	3	0	0	0
ENSONIG00000003425	GL831133.1;GL831133.1;GL831133.1;GL831133.1;GL831133.1;GL831133.1;GL831133.1;GL831133.1;GL831133.1;GL831133.1;GL831133.1;GL831133.1	11749805;11751544;11752172;11753441;11753441;11754501;11755125;11757748;11757748;11760228;11760228;11767906	11752330;11752081;11752336;11754422;11755497;11754998;11755497;11757983;11757983;11760333;11760330;11768197	-;-;-;-;-;-;-;-;-;-;-;-	5223	1048	1867	793	1626	1647	2395	1127	1685	1712	1479	1044	853	1297	1461	1918	1383	1899	1454	1324	1256	1226	1484	1582	1402	1200	1381	1421	1136	658	1014
ENSONIG00000003428	GL831133.1;GL831133.1	11848146;11851827	11848509;11852574	+;+	1112	0	0	0	0	0	0	0	0	0	0	0	0	0	0	0	0	0	0	0	0	0	0	0	0	0	0	0	0	0	2
ENSONIG00000003429	GL831133.1;GL831133.1;GL831133.1;GL831133.1;GL831133.1;GL831133.1;GL831133.1;GL831133.1;GL831133.1;GL831133.1;GL831133.1;GL831133.1	11874558;11876360;11876589;11877006;11877268;11877983;11878226;11878448;11878615;11878797;11879109;11881765	11874573;11876504;11876734;11877182;11877383;11878143;11878352;11878525;11878691;11878854;11879219;11881836	+;+;+;+;+;+;+;+;+;+;+;+	1284	320	417	226	395	438	667	297	518	393	348	425	332	475	462	561	428	437	399	267	374	354	440	376	376	376	363	414	307	201	353
ENSONIG00000003437	GL831133.1;GL831133.1;GL831133.1;GL831133.1;GL831133.1;GL831133.1;GL831133.1;GL831133.1;GL831133.1;GL831133.1;GL831133.1;GL831133.1;GL831133.1;GL831133.1;GL831133.1;GL831133.1;GL831133.1;GL831133.1;GL831133.1;GL831133.1;GL831133.1;GL831133.1	11884869;11884947;11885058;11886117;11886117;11886289;11886289;11886463;11886463;11886621;11886621;11887435;11887435;11887708;11887708;11889390;11889390;11889688;11889688;11890207;11890207;11892288	11884913;11885309;11885309;11886212;11886212;11886381;11886381;11886537;11886537;11886740;11886740;11887629;11887629;11887878;11887878;11889481;11889481;11889835;11889835;11890315;11890302;11892425	-;-;-;-;-;-;-;-;-;-;-;-;-;-;-;-;-;-;-;-;-;-	1645	147	260	134	206	180	303	123	311	168	174	140	139	189	191	258	225	210	191	106	134	187	213	206	213	94	178	146	205	84	170
ENSONIG00000003440	GL831133.1;GL831133.1;GL831133.1;GL831133.1;GL831133.1;GL831133.1;GL831133.1;GL831133.1;GL831133.1;GL831133.1;GL831133.1	11923197;11923899;11930697;11931470;11933089;11933400;11941331;11942302;11944738;11945830;11946136	11923559;11924291;11930920;11931578;11933205;11933609;11941501;11942405;11944850;11945842;11946142	+;+;+;+;+;+;+;+;+;+;+	1824	11	61	17	36	47	51	49	38	33	46	35	50	47	36	32	30	55	52	13	11	31	39	42	63	6	31	18	14	27	31
ENSONIG00000003443	GL831133.1;GL831133.1;GL831133.1;GL831133.1;GL831133.1;GL831133.1;GL831133.1;GL831133.1;GL831133.1	12033123;12033354;12034632;12035451;12036434;12037265;12038774;12039918;12040648	12033168;12033399;12034710;12035459;12036548;12037384;12038963;12040056;12040734	+;+;+;+;+;+;+;+;+	831	35	42	14	28	26	40	18	22	32	23	20	27	20	31	27	17	17	11	16	27	8	20	12	38	10	14	9	23	9	28
ENSONIG00000003446	GL831133.1;GL831133.1;GL831133.1;GL831133.1;GL831133.1;GL831133.1;GL831133.1;GL831133.1;GL831133.1;GL831133.1;GL831133.1;GL831133.1;GL831133.1;GL831133.1;GL831133.1;GL831133.1;GL831133.1;GL831133.1;GL831133.1;GL831133.1;GL831133.1	12046918;12047914;12048049;12048282;12048435;12048622;12048756;12048922;12049121;12049397;12052699;12052797;12052988;12053124;12053496;12053753;12054012;12054191;12054463;12055260;12055467	12047002;12047974;12048165;12048335;12048524;12048673;12048844;12049039;12049252;12049446;12052723;12052924;12053036;12053226;12053664;12053888;12054118;12054322;12054532;12055388;12055649	+;+;+;+;+;+;+;+;+;+;+;+;+;+;+;+;+;+;+;+;+	2079	218	464	189	322	302	508	231	339	343	293	369	189	215	376	423	279	372	310	237	248	305	369	415	364	395	291	307	300	158	217
ENSONIG00000003453	GL831133.1;GL831133.1;GL831133.1;GL831133.1;GL831133.1;GL831133.1;GL831133.1;GL831133.1;GL831133.1;GL831133.1;GL831133.1;GL831133.1;GL831133.1;GL831133.1;GL831133.1;GL831133.1;GL831133.1;GL831133.1;GL831133.1;GL831133.1;GL831133.1;GL831133.1;GL831133.1;GL831133.1;GL831133.1;GL831133.1;GL831133.1;GL831133.1;GL831133.1;GL831133.1;GL831133.1;GL831133.1;GL831133.1;GL831133.1;GL831133.1;GL831133.1;GL8…	12059268;12060090;12063024;12063024;12063287;12063287;12067218;12067218;12067481;12067481;12067758;12067758;12068900;12068900;12069571;12069571;12069756;12069756;12069902;12069902;12071520;12071520;12071724;12071724;12072208;12072208;12072407;12072407;12072564;12072617;12072623;12073241;12073241;12073613;12073613;12073850;12073850;12075064;12075064;12075212;12075212;12075386;12075386;12075837;120…	12060240;12060240;12063079;12063079;12063363;12063363;12067395;12067395;12067597;12067597;12067864;12067864;12068972;12068972;12069670;12069670;12069821;12069821;12069966;12069966;12071611;12071611;12071796;12071805;12072297;12072297;12072511;12072526;12072572;12072682;12072682;12073369;12073369;12073662;12073662;12073946;12073946;12075135;12075135;12075285;12075285;12075491;12075491;12075919;120…	+;+;+;+;+;+;+;+;+;+;+;+;+;+;+;+;+;+;+;+;+;+;+;+;+;+;+;+;+;+;+;+;+;+;+;+;+;+;+;+;+;+;+;+;+;+;+;+;+;+;+	3135	28	35	6	54	24	101	34	55	43	45	76	37	45	45	41	42	72	17	38	33	32	20	40	37	9	32	53	20	11	40
ENSONIG00000021973	GL831133.1	12072356	12072451	+	96	0	0	0	0	0	0	0	0	0	0	0	0	0	0	0	0	0	0	0	0	0	0	0	0	0	0	0	0	0	0
ENSONIG00000003458	GL831133.1;GL831133.1;GL831133.1;GL831133.1;GL831133.1;GL831133.1	12081104;12081460;12081760;12081917;12082648;12083061	12081178;12081683;12081837;12081978;12082749;12083197	+;+;+;+;+;+	678	145	271	168	120	115	142	77	271	189	81	104	66	132	122	164	106	174	102	116	256	194	303	213	239	178	203	80	255	41	136
ENSONIG00000003462	GL831133.1;GL831133.1	12097419;12098700	12098473;12099135	-;-	1491	3	1	2	13	6	7	12	4	6	2	6	8	8	19	21	16	9	8	0	3	6	2	23	2	24	4	3	0	4	2
ENSONIG00000003463	GL831133.1;GL831133.1;GL831133.1;GL831133.1;GL831133.1;GL831133.1;GL831133.1;GL831133.1;GL831133.1;GL831133.1;GL831133.1;GL831133.1;GL831133.1;GL831133.1;GL831133.1;GL831133.1;GL831133.1;GL831133.1;GL831133.1;GL831133.1;GL831133.1;GL831133.1;GL831133.1;GL831133.1;GL831133.1;GL831133.1;GL831133.1;GL831133.1;GL831133.1;GL831133.1;GL831133.1;GL831133.1;GL831133.1;GL831133.1;GL831133.1;GL831133.1;GL8…	12104393;12104393;12109543;12109646;12109646;12109646;12109984;12109984;12109984;12110324;12110324;12110324;12110559;12110559;12110565;12113388;12113388;12113388;12114704;12114704;12114704;12116214;12116214;12116214;12116456;12116456;12116456;12117157;12117157;12117157;12117919;12117935;12118283;12118283;12118291;12118439;12121382;12121382;12121529;12130289	12105176;12105176;12109566;12109733;12109733;12109733;12110179;12110179;12110179;12110477;12110477;12110477;12110735;12110729;12110738;12113552;12113552;12113552;12114812;12114812;12114812;12116373;12116373;12116373;12116660;12116660;12116660;12117255;12117280;12117260;12117960;12117960;12118902;12118393;12118662;12118902;12121464;12121464;12121537;12130481	-;-;-;-;-;-;-;-;-;-;-;-;-;-;-;-;-;-;-;-;-;-;-;-;-;-;-;-;-;-;-;-;-;-;-;-;-;-;-;-	3136	189	380	153	381	339	438	272	333	281	317	279	220	366	378	578	253	402	311	187	282	263	286	350	376	326	287	323	178	188	223
ENSONIG00000003468	GL831133.1;GL831133.1;GL831133.1;GL831133.1;GL831133.1;GL831133.1;GL831133.1;GL831133.1	12137158;12137796;12139498;12140998;12141531;12142633;12157253;12169257	12137220;12137879;12139614;12141117;12141605;12142730;12157367;12169322	-;-;-;-;-;-;-;-	738	3469	5384	2117	5038	4945	6390	3725	4194	3598	4864	5063	3432	5538	5773	6135	4863	5000	4044	2803	2752	3663	3696	4510	4302	6300	3344	4081	2765	2306	3298
ENSONIG00000003476	GL831133.1;GL831133.1;GL831133.1;GL831133.1;GL831133.1;GL831133.1;GL831133.1;GL831133.1;GL831133.1;GL831133.1;GL831133.1	12174112;12174940;12175521;12177504;12177925;12180024;12180308;12180452;12180638;12180961;12181406	12174574;12175073;12175616;12177629;12178064;12180220;12180375;12180552;12180821;12181122;12181459	-;-;-;-;-;-;-;-;-;-;-	1725	1	1	2	4	0	0	11	0	4	2	2	0	1	0	0	0	0	3	0	1	3	1	0	1	0	4	7	2	0	0
ENSONIG00000003489	GL831133.1;GL831133.1;GL831133.1;GL831133.1;GL831133.1;GL831133.1;GL831133.1;GL831133.1;GL831133.1;GL831133.1;GL831133.1;GL831133.1;GL831133.1;GL831133.1;GL831133.1;GL831133.1;GL831133.1;GL831133.1;GL831133.1;GL831133.1;GL831133.1;GL831133.1;GL831133.1;GL831133.1;GL831133.1;GL831133.1;GL831133.1;GL831133.1;GL831133.1;GL831133.1;GL831133.1;GL831133.1;GL831133.1;GL831133.1;GL831133.1;GL831133.1;GL8…	12184179;12184965;12184973;12186940;12186940;12187574;12187574;12188884;12188884;12190053;12190053;12190305;12190305;12190488;12190488;12190715;12190715;12191559;12191559;12191893;12191893;12192114;12192114;12192883;12192883;12193312;12193312;12193652;12193652;12194213;12194213;12195206;12195206;12195445;12195445;12196711;12196713;12197192;12197263;12197279;12197601;12197601;12198198;12198198;121…	12184257;12185039;12185039;12187008;12187008;12187716;12187716;12189077;12189077;12190182;12190182;12190406;12190406;12190596;12190596;12190865;12190865;12191727;12191727;12192030;12192030;12192296;12192296;12192980;12192980;12193543;12193543;12193816;12193816;12194349;12194349;12195288;12195288;12195534;12195536;12196834;12196833;12197208;12197379;12197379;12197670;12197670;12198332;12198309;121…	+;+;+;+;+;+;+;+;+;+;+;+;+;+;+;+;+;+;+;+;+;+;+;+;+;+;+;+;+;+;+;+;+;+;+;+;+;+;+;+;+;+;+;+;+;+	2987	239	370	147	306	220	399	208	303	276	235	258	218	208	298	443	189	328	223	178	195	227	257	302	325	197	227	236	220	133	221
ENSONIG00000023928	GL831133.1;GL831133.1;GL831133.1	12209305;12210209;12210770	12209543;12210491;12211058	-;-;-	811	21	48	0	48	34	63	4	63	56	43	17	18	48	21	49	12	60	35	29	35	48	0	34	34	74	32	32	53	21	4
ENSONIG00000003498	GL831133.1;GL831133.1	12215713;12216824	12216184;12217005	-;-	654	0	0	0	0	0	0	0	0	0	0	0	1	0	0	0	1	0	0	0	0	0	0	0	0	5	0	0	0	0	0
ENSONIG00000003499	GL831133.1;GL831133.1	12221370;12222635	12221635;12222794	-;-	426	14	39	9	24	21	36	16	29	16	32	34	13	19	23	44	29	11	27	12	12	19	8	21	17	21	21	11	15	4	8
ENSONIG00000003500	GL831133.1;GL831133.1;GL831133.1;GL831133.1	12226262;12227733;12227951;12228218	12227193;12227875;12228101;12232128	+;+;+;+	5137	37	98	76	49	42	23	35	58	57	33	29	20	46	48	21	31	33	31	15	74	26	101	44	90	25	52	31	77	17	49
ENSONIG00000003502	GL831133.1;GL831133.1;GL831133.1;GL831133.1;GL831133.1;GL831133.1	12227708;12231825;12234270;12234508;12234777;12235912	12229098;12231952;12234420;12234688;12234859;12235984	-;-;-;-;-;-	2007	11	21	11	12	14	20	6	18	31	22	10	9	15	23	33	19	12	14	13	23	13	15	23	16	16	18	14	20	12	17
ENSONIG00000003504	GL831133.1;GL831133.1;GL831133.1;GL831133.1;GL831133.1;GL831133.1;GL831133.1;GL831133.1;GL831133.1;GL831133.1;GL831133.1;GL831133.1;GL831133.1;GL831133.1;GL831133.1;GL831133.1;GL831133.1;GL831133.1;GL831133.1;GL831133.1;GL831133.1;GL831133.1;GL831133.1	12238054;12238664;12238773;12238884;12238889;12239522;12239522;12239704;12239704;12240014;12240014;12240404;12240404;12240640;12240640;12241861;12241861;12242145;12242145;12242342;12242342;12245483;12245483	12238195;12238714;12238791;12238971;12238971;12239584;12239584;12239870;12239870;12240149;12240149;12240550;12240550;12240735;12240735;12241995;12241995;12242256;12242256;12242499;12242499;12245602;12246629	+;+;+;+;+;+;+;+;+;+;+;+;+;+;+;+;+;+;+;+;+;+;+	2461	92	120	47	136	133	161	112	123	97	92	246	65	115	108	119	96	88	88	98	48	111	96	180	104	66	123	115	59	68	67
ENSONIG00000024939	GL831133.1;GL831133.1	12247218;12248548	12248371;12250060	+;+	2667	2	4	5	8	3	4	1	12	9	8	16	6	13	5	2	5	2	5	0	0	13	9	6	0	1	0	0	1	5	3
ENSONIG00000024919	GL831133.1;GL831133.1	12284947;12286978	12285707;12287446	+;+	1230	0	0	0	2	2	0	0	0	2	0	0	0	0	0	0	3	0	0	0	0	4	0	0	0	0	1	0	0	0	0
ENSONIG00000024783	GL831133.1;GL831133.1;GL831133.1;GL831133.1	12377570;12377570;12378216;12386155	12377991;12377991;12378424;12386208	-;-;-;-	685	0	0	0	0	0	0	0	0	0	0	0	0	0	0	0	0	0	0	0	0	0	0	0	0	0	0	0	0	0	0
ENSONIG00000023058	GL831133.1;GL831133.1	12414038;12433416	12414523;12434587	+;+	1658	46	91	23	37	69	80	52	51	48	68	70	35	69	72	116	64	42	45	26	26	35	76	74	104	16	24	67	32	25	31
ENSONIG00000003511	GL831133.1;GL831133.1;GL831133.1;GL831133.1;GL831133.1	12507650;12518563;12541653;12549027;12550207	12509951;12518597;12541773;12550098;12550783	+;+;+;+;+	4107	461	799	270	400	569	835	411	443	506	641	589	357	571	583	580	610	548	401	427	303	452	535	613	772	220	408	532	337	254	396
ENSONIG00000023494	GL831133.1;GL831133.1;GL831133.1	12583321;12588409;12653591	12583529;12588498;12653744	-;-;-	453	0	0	0	3	2	1	0	0	0	1	0	0	0	0	0	1	0	0	0	0	1	2	1	3	1	0	1	2	3	1
ENSONIG00000022998	GL831133.1;GL831133.1	12634335;12634973	12634441;12635269	+;+	404	0	0	0	0	0	0	0	0	0	0	0	0	0	0	0	0	0	0	0	0	0	0	0	0	0	0	0	0	0	0
ENSONIG00000003514	GL831133.1;GL831133.1;GL831133.1;GL831133.1;GL831133.1;GL831133.1;GL831133.1;GL831133.1;GL831133.1	12745723;12745946;12746449;12746697;12746960;12747648;12747775;12747943;12749187	12745733;12746299;12746692;12746730;12747645;12747773;12747930;12748011;12749324	-;-;-;-;-;-;-;-;-	1818	6	8	2	6	5	14	6	3	9	7	6	13	9	4	6	11	5	4	10	4	17	12	7	4	43	5	3	6	4	6
ENSONIG00000027091	GL831133.1;GL831133.1	12758730;12759295	12759138;12759520	-;-	635	12	31	12	13	28	33	17	17	15	20	39	4	24	33	40	30	19	17	14	8	28	22	28	26	30	36	16	16	16	11
ENSONIG00000003518	GL831133.1;GL831133.1;GL831133.1;GL831133.1;GL831133.1	12797593;12797907;12800723;12800934;12802084	12797762;12800668;12800846;12801248;12802102	-;-;-;-;-	3390	99	169	61	88	114	160	82	88	85	95	119	62	121	134	120	77	77	63	76	96	98	101	98	84	30	64	79	105	48	82
ENSONIG00000022944	GL831133.1;GL831133.1	12885268;12890237	12885412;12892067	+;+	1976	0	0	0	0	0	0	0	0	0	0	0	0	0	0	0	0	0	0	0	0	0	7	0	0	0	0	0	1	0	2
ENSONIG00000026968	GL831133.1;GL831133.1;GL831133.1;GL831133.1	13010113;13010113;13011982;13013961	13010420;13010388;13012418;13014191	+;+;+;+	976	0	0	1	0	0	0	0	0	0	0	0	0	0	0	0	1	0	0	1	0	0	0	1	0	0	0	0	0	0	0
ENSONIG00000025501	GL831133.1;GL831133.1;GL831133.1;GL831133.1;GL831133.1;GL831133.1;GL831133.1;GL831133.1;GL831133.1	13207327;13207327;13207691;13207691;13207911;13210063;13210063;13210826;13210826	13207378;13207378;13209960;13207789;13209960;13210251;13210251;13211859;13211859	+;+;+;+;+;+;+;+;+	3545	15	41	11	2	19	8	9	315	4	22	18	1	5	10	15	1	8	0	0	1	311	416	526	26	5	19	6	0	14	16
ENSONIG00000003520	GL831133.1;GL831133.1;GL831133.1;GL831133.1;GL831133.1;GL831133.1	13272925;13277493;13278183;13278708;13279003;13279513	13273650;13277839;13278499;13278979;13279042;13279526	+;+;+;+;+;+	1716	2	2	0	1	0	1	0	1	0	0	2	0	1	0	3	0	0	0	0	2	3	2	2	1	0	0	0	0	2	0
ENSONIG00000026184	GL831133.1;GL831133.1	13311591;13313768	13311746;13313979	-;-	368	0	0	0	0	0	0	0	0	0	0	0	0	0	0	0	0	0	0	0	0	0	0	0	0	0	0	0	0	0	0
ENSONIG00000003521	GL831133.1;GL831133.1;GL831133.1;GL831133.1;GL831133.1;GL831133.1;GL831133.1;GL831133.1;GL831133.1;GL831133.1;GL831133.1;GL831133.1;GL831133.1;GL831133.1;GL831133.1;GL831133.1;GL831133.1;GL831133.1;GL831133.1;GL831133.1;GL831133.1;GL831133.1;GL831133.1;GL831133.1;GL831133.1;GL831133.1;GL831133.1;GL831133.1;GL831133.1;GL831133.1;GL831133.1;GL831133.1;GL831133.1;GL831133.1;GL831133.1;GL831133.1;GL8…	13377680;13377750;13378144;13384228;13386657;13387262;13388894;13393358;13394598;13406177;13406481;13407583;13408306;13408584;13411439;13419422;13421046;13421397;13424013;13426719;13426998;13427298;13427968;13428517;13429058;13429563;13430406;13432613;13432891;13440843;13442612;13443763;13446165;13448624;13448809;13449025;13450865;13451134;13452518;13452913;13453324;13457535;13457803;13458188;134…	13377733;13377764;13378237;13384339;13386820;13387389;13389007;13393576;13394634;13406193;13406812;13407742;13408434;13408751;13411535;13419595;13421148;13421511;13424203;13426869;13427202;13427462;13428148;13428729;13429254;13429736;13430581;13432733;13433127;13441064;13442714;13444088;13446378;13448729;13448920;13449085;13451039;13451249;13452665;13453036;13453456;13457655;13457981;13458329;134…	+;+;+;+;+;+;+;+;+;+;+;+;+;+;+;+;+;+;+;+;+;+;+;+;+;+;+;+;+;+;+;+;+;+;+;+;+;+;+;+;+;+;+;+;+;+;+;+;+;+;+	7344	2114	4140	1793	2364	2183	3668	1841	2736	2650	2983	2147	1807	2397	2875	2511	2577	2452	2094	1998	2223	1861	2606	2778	2672	1650	2075	1934	2067	1209	2068
ENSONIG00000003544	GL831133.1;GL831133.1	13490852;13491833	13491233;13492380	+;+	930	0	0	0	7	0	4	10	0	8	3	7	13	6	5	9	2	7	7	2	1	2	0	0	2	0	2	9	0	1	0
ENSONIG00000003545	GL831133.1;GL831133.1;GL831133.1;GL831133.1;GL831133.1;GL831133.1;GL831133.1;GL831133.1;GL831133.1;GL831133.1;GL831133.1;GL831133.1;GL831133.1;GL831133.1;GL831133.1;GL831133.1;GL831133.1;GL831133.1;GL831133.1;GL831133.1	13566001;13567900;13568183;13568380;13568551;13568716;13569320;13569512;13569708;13570148;13570476;13572054;13573214;13573998;13577437;13577928;13593939;13594176;13595430;13601735	13566302;13568073;13568294;13568467;13568635;13568821;13569426;13569628;13569868;13570401;13570642;13572248;13573372;13574155;13577542;13578098;13594079;13594334;13595584;13602227	+;+;+;+;+;+;+;+;+;+;+;+;+;+;+;+;+;+;+;+	3410	431	433	232	344	289	504	414	636	414	281	649	389	399	533	561	293	593	370	405	461	452	664	305	434	444	528	355	507	170	452
ENSONIG00000023197	GL831134.1;GL831134.1;GL831134.1;GL831134.1;GL831134.1;GL831134.1;GL831134.1;GL831134.1;GL831134.1	32648;61730;103781;208724;208724;238482;276924;276924;276924	33500;61737;103821;208987;208956;238521;277080;277080;277080	+;+;+;+;+;+;+;+;+	1363	6	10	8	14	8	13	2	10	8	7	3	4	9	6	8	6	10	8	5	3	7	2	11	3	10	5	7	1	2	8
ENSONIG00000025036	GL831134.1;GL831134.1	32648;147091	32865;147762	-;-	890	2	0	2	0	4	5	2	2	1	3	8	6	1	5	5	5	5	2	4	3	7	1	1	2	2	2	0	0	0	3
ENSONIG00000009170	GL831134.1;GL831134.1	312693;314504	313060;314875	+;+	740	0	0	0	0	0	0	0	0	0	0	0	0	0	0	0	0	2	0	0	0	0	0	0	0	0	0	0	0	2	0
ENSONIG00000025813	GL831134.1;GL831134.1	349329;352305	350004;352690	-;-	1062	12	30	17	40	42	43	22	28	14	25	77	51	28	25	42	35	24	20	13	8	26	27	36	34	42	19	13	15	9	21
ENSONIG00000024022	GL831134.1;GL831134.1	376199;376917	376794;377430	+;+	1110	0	0	0	0	0	0	0	0	0	0	0	0	0	0	0	0	0	0	0	0	0	0	0	0	0	0	0	0	0	0
ENSONIG00000009171	GL831134.1;GL831134.1;GL831134.1;GL831134.1;GL831134.1;GL831134.1	415873;416808;416998;417273;419559;419777	416017;416892;417156;417398;419651;419801	-;-;-;-;-;-	633	33	51	14	42	37	30	27	41	39	41	36	35	41	29	45	28	40	15	25	18	36	35	42	37	37	13	21	28	15	38
ENSONIG00000009172	GL831134.1;GL831134.1;GL831134.1;GL831134.1;GL831134.1	437469;437796;437969;438208;439659	437496;437880;438127;438333;439776	-;-;-;-;-	516	173	215	99	150	130	201	162	204	168	150	132	120	154	200	258	168	190	130	111	132	140	165	194	191	275	193	112	179	96	166
ENSONIG00000024274	GL831134.1;GL831134.1	452819;453979	453250;455473	+;+	1927	2	9	0	4	2	0	4	0	13	5	0	1	11	2	6	9	8	3	6	2	2	9	1	6	0	1	1	4	0	11
ENSONIG00000009173	GL831134.1;GL831134.1;GL831134.1;GL831134.1	501727;504816;505514;505667	503630;504928;505561;506525	-;-;-;-	2924	20563	25933	15179	25173	24730	33915	17752	31891	22142	19899	26622	18468	22458	24168	35385	22196	25954	18895	15304	20145	21732	18970	24567	17173	43018	22111	18905	16966	11066	20805
ENSONIG00000009174	GL831134.1;GL831134.1;GL831134.1;GL831134.1;GL831134.1;GL831134.1;GL831134.1;GL831134.1;GL831134.1;GL831134.1;GL831134.1;GL831134.1;GL831134.1;GL831134.1;GL831134.1;GL831134.1;GL831134.1;GL831134.1;GL831134.1;GL831134.1;GL831134.1;GL831134.1;GL831134.1;GL831134.1;GL831134.1;GL831134.1;GL831134.1;GL831134.1;GL831134.1;GL831134.1;GL831134.1;GL831134.1;GL831134.1;GL831134.1;GL831134.1;GL831134.1;GL8…	507345;507647;507821;508506;509604;509811;510822;510976;512219;512219;512500;512500;512980;513380;513380;513941;513941;514797;515087;515312;515657;515843;515843;517546;518168;518534;518566;518789;518916;519270;519270;519956;519956;520136;520136;520437;520658;520686;520968;520979;521144;521414	507575;507722;507914;508623;509718;509970;511059;511059;512397;512397;512718;512718;513006;513545;513545;514128;514128;514940;515189;515471;515756;515965;515965;517576;518175;518541;518674;518986;518986;519437;519437;520047;520047;520301;520297;520556;520873;520896;521085;521114;521194;521435	-;-;-;-;-;-;-;-;-;-;-;-;-;-;-;-;-;-;-;-;-;-;-;-;-;-;-;-;-;-;-;-;-;-;-;-;-;-;-;-;-;-	3800	0	10	0	6	12	4	0	0	0	0	1	0	1	2	0	7	0	0	0	0	14	0	2	7	4	0	4	0	0	5
ENSONIG00000009176	GL831134.1;GL831134.1;GL831134.1;GL831134.1;GL831134.1;GL831134.1;GL831134.1;GL831134.1;GL831134.1;GL831134.1;GL831134.1;GL831134.1;GL831134.1;GL831134.1;GL831134.1;GL831134.1;GL831134.1;GL831134.1;GL831134.1;GL831134.1;GL831134.1;GL831134.1;GL831134.1;GL831134.1;GL831134.1;GL831134.1;GL831134.1;GL831134.1;GL831134.1;GL831134.1;GL831134.1;GL831134.1;GL831134.1;GL831134.1;GL831134.1;GL831134.1;GL8…	536633;536996;537523;537768;538210;538783;539010;540084;540883;541133;541413;541628;542185;542592;542801;542926;543002;543466;544781;545072;545292;545670;546166;546703;548040;548414;548590;549037;549534;550157;550463;550791;554610;559182;564631;565960;567126;567459;568051;568275;569838;570185	536791;537352;537699;537935;538305;538899;539207;540238;540996;541248;541537;541827;542286;542632;542880;542939;543155;543504;544944;545133;545341;545812;546271;546827;548084;548535;548620;549219;549699;550352;550563;550895;554644;559257;564670;565966;567234;567572;568188;568466;569992;570211	+;+;+;+;+;+;+;+;+;+;+;+;+;+;+;+;+;+;+;+;+;+;+;+;+;+;+;+;+;+;+;+;+;+;+;+;+;+;+;+;+;+	4904	609	689	363	481	524	617	381	787	549	499	446	483	600	411	797	564	672	460	383	449	394	468	588	450	380	601	394	397	248	567
ENSONIG00000009178	GL831134.1;GL831134.1;GL831134.1;GL831134.1;GL831134.1;GL831134.1	608518;609831;610178;610742;610979;611208	608557;609985;610291;610857;611127;611281	+;+;+;+;+;+	648	0	1	0	0	0	0	0	0	0	0	0	0	0	0	0	1	0	2	0	0	0	0	0	2	0	0	0	2	0	0
ENSONIG00000009179	GL831134.1;GL831134.1;GL831134.1;GL831134.1;GL831134.1;GL831134.1;GL831134.1;GL831134.1;GL831134.1;GL831134.1;GL831134.1;GL831134.1;GL831134.1;GL831134.1;GL831134.1;GL831134.1;GL831134.1;GL831134.1;GL831134.1;GL831134.1;GL831134.1;GL831134.1;GL831134.1;GL831134.1;GL831134.1;GL831134.1;GL831134.1;GL831134.1;GL831134.1;GL831134.1;GL831134.1	644897;645230;645801;646145;646516;647102;647344;648542;648998;649751;651283;651502;652103;652291;652708;652946;653240;653838;654116;654642;654999;655252;655579;655907;656625;656981;658431;658702;658948;659161;659712	644910;645561;645971;646300;646638;647239;647526;648696;649111;649866;651431;651675;652129;652429;652780;653099;653278;654001;654177;654742;655144;655357;655707;655941;656727;657213;658596;658869;659067;659336;659984	+;+;+;+;+;+;+;+;+;+;+;+;+;+;+;+;+;+;+;+;+;+;+;+;+;+;+;+;+;+;+	4239	15	15	2	2	32	39	16	31	2	0	29	10	1	11	0	6	7	16	21	15	2	14	0	7	8	6	11	37	11	4
ENSONIG00000009182	GL831134.1;GL831134.1;GL831134.1;GL831134.1;GL831134.1;GL831134.1;GL831134.1;GL831134.1;GL831134.1;GL831134.1;GL831134.1;GL831134.1;GL831134.1;GL831134.1;GL831134.1;GL831134.1;GL831134.1;GL831134.1;GL831134.1;GL831134.1;GL831134.1;GL831134.1;GL831134.1;GL831134.1;GL831134.1;GL831134.1;GL831134.1;GL831134.1;GL831134.1;GL831134.1;GL831134.1;GL831134.1	664102;664478;665011;665799;666371;666725;666959;667414;669051;669590;669841;670078;671077;671336;671505;672006;672294;672572;673341;673576;673864;675040;675330;675564;676850;677470;677919;679661;679916;680490;680891;680991	664256;664834;665181;665954;666481;666862;667135;667568;669164;669705;669989;670277;671198;671408;671661;672044;672457;672636;673441;673718;673969;675164;675377;675599;676952;677702;678084;679828;680032;680651;680914;683099	+;+;+;+;+;+;+;+;+;+;+;+;+;+;+;+;+;+;+;+;+;+;+;+;+;+;+;+;+;+;+;+	6260	14	34	0	2	10	1	7	21	1	9	2	10	41	2	3	6	17	1	2	25	1	13	5	16	1	4	8	6	16	4
ENSONIG00000009185	GL831134.1;GL831134.1;GL831134.1;GL831134.1;GL831134.1;GL831134.1;GL831134.1;GL831134.1;GL831134.1;GL831134.1;GL831134.1;GL831134.1;GL831134.1;GL831134.1;GL831134.1;GL831134.1;GL831134.1;GL831134.1;GL831134.1;GL831134.1;GL831134.1;GL831134.1;GL831134.1;GL831134.1;GL831134.1;GL831134.1;GL831134.1;GL831134.1	684266;686013;686195;686449;687936;688042;688169;688671;688671;689325;689325;691605;691605;691840;691840;691986;691986;692492;692676;692800;692800;693785;693785;694372;694372;696688;696688;715096	686789;686020;686388;686707;687963;688342;688342;688766;688766;689485;689476;691714;691714;691898;691898;692072;692066;692505;692701;692861;692861;693933;693924;694494;694494;696723;696753;715537	-;-;-;-;-;-;-;-;-;-;-;-;-;-;-;-;-;-;-;-;-;-;-;-;-;-;-;-	4248	424	794	319	414	541	781	402	477	392	430	375	316	470	412	492	391	411	350	283	339	318	322	369	362	357	373	389	269	223	299
ENSONIG00000009188	GL831134.1;GL831134.1;GL831134.1;GL831134.1;GL831134.1;GL831134.1;GL831134.1	734477;734874;736240;736240;736666;737179;737827	735502;735499;736321;736468;736711;737256;738080	-;-;-;-;-;-;-	1633	0	3	0	0	6	0	2	0	0	2	0	0	0	2	0	1	0	1	0	2	3	0	0	0	0	13	2	0	0	1
ENSONIG00000009189	GL831134.1;GL831134.1;GL831134.1;GL831134.1;GL831134.1;GL831134.1;GL831134.1;GL831134.1;GL831134.1;GL831134.1;GL831134.1;GL831134.1;GL831134.1;GL831134.1;GL831134.1;GL831134.1;GL831134.1;GL831134.1;GL831134.1;GL831134.1;GL831134.1;GL831134.1;GL831134.1;GL831134.1;GL831134.1;GL831134.1;GL831134.1;GL831134.1	739061;744047;744480;744752;744752;745114;745114;745384;745384;745595;745595;745857;745857;746676;746676;747099;747099;747570;747570;748694;748694;748966;748966;749253;749253;749492;752370;752370	744278;744278;744524;744873;744873;745267;745267;745438;745438;745682;745682;745945;745945;746770;746770;747294;747294;747660;747660;748840;748840;749061;749061;749328;749576;749576;752409;752764	-;-;-;-;-;-;-;-;-;-;-;-;-;-;-;-;-;-;-;-;-;-;-;-;-;-;-;-	7115	5997	8556	4251	5745	5977	8836	4790	6503	6407	5788	5374	3388	5464	6331	6526	5217	6890	4889	4823	5026	4449	5015	5854	4551	5835	5171	4601	4627	2699	4794
ENSONIG00000009194	GL831134.1;GL831134.1;GL831134.1;GL831134.1;GL831134.1;GL831134.1;GL831134.1	755735;755950;756188;756807;757768;758959;761970	755864;756059;756330;757283;758811;759045;762093	-;-;-;-;-;-;-	2115	389	383	247	228	282	293	262	408	381	332	242	266	355	202	461	180	507	333	263	313	285	191	271	247	345	495	186	307	98	298
ENSONIG00000009196	GL831134.1;GL831134.1;GL831134.1;GL831134.1;GL831134.1;GL831134.1;GL831134.1;GL831134.1;GL831134.1;GL831134.1;GL831134.1;GL831134.1;GL831134.1;GL831134.1;GL831134.1;GL831134.1;GL831134.1	790889;793823;793865;794141;794141;794380;794380;795046;795046;795822;795825;796031;796031;796874;796874;797247;798652	790980;793958;793958;794289;794289;794550;794550;795481;795481;795947;795947;796245;796245;797052;797052;797262;798658	+;+;+;+;+;+;+;+;+;+;+;+;+;+;+;+;+	1527	0	0	0	0	0	0	0	0	0	0	0	0	0	0	0	0	0	0	0	0	0	0	0	1	0	0	0	0	0	0
ENSONIG00000009199	GL831134.1;GL831134.1;GL831134.1;GL831134.1;GL831134.1;GL831134.1;GL831134.1;GL831134.1;GL831134.1;GL831134.1;GL831134.1;GL831134.1	794982;802284;802957;803936;805674;808047;809543;810495;812303;814353;815419;828880	799494;802415;803110;804012;805853;808202;809692;810598;812401;814452;815709;829293	-;-;-;-;-;-;-;-;-;-;-;-	6370	604	587	447	613	637	912	430	842	615	604	633	597	813	699	751	599	673	491	470	507	610	625	734	544	561	560	425	477	248	581
ENSONIG00000009205	GL831134.1;GL831134.1;GL831134.1;GL831134.1;GL831134.1;GL831134.1;GL831134.1;GL831134.1	834718;835783;835784;836853;836853;837420;838149;838149	835345;835887;835887;836987;836987;837524;841758;838332	+;+;+;+;+;+;+;+	4583	36371	54727	26687	40745	42994	64654	30839	47355	43960	42299	48893	27239	44172	46301	52397	41676	48811	37349	29791	34416	31564	38897	46866	35852	63017	37415	33404	31965	19295	32620
ENSONIG00000009207	GL831134.1;GL831134.1;GL831134.1;GL831134.1;GL831134.1;GL831134.1;GL831134.1;GL831134.1;GL831134.1;GL831134.1;GL831134.1;GL831134.1;GL831134.1;GL831134.1;GL831134.1;GL831134.1;GL831134.1;GL831134.1;GL831134.1;GL831134.1	992317;992962;992964;995698;995698;996001;996001;997386;998640;999603;1002668;1005165;1005263;1006826;1007057;1007474;1007704;1007711;1008393;1008393	992396;993089;993089;995888;995888;997304;997950;997955;998648;999640;1002707;1005503;1005503;1006839;1007110;1007533;1007851;1007851;1008715;1008715	+;+;+;+;+;+;+;+;+;+;+;+;+;+;+;+;+;+;+;+	3379	310	406	185	345	355	487	216	426	363	294	420	323	463	370	369	199	508	367	241	201	264	302	360	300	583	425	338	247	135	282
ENSONIG00000009209	GL831134.1;GL831134.1;GL831134.1;GL831134.1;GL831134.1;GL831134.1;GL831134.1;GL831134.1;GL831134.1;GL831134.1;GL831134.1;GL831134.1;GL831134.1;GL831134.1;GL831134.1;GL831134.1;GL831134.1;GL831134.1;GL831134.1;GL831134.1	1012248;1012983;1013909;1015730;1016374;1017665;1018175;1018533;1018773;1018968;1019134;1019968;1020319;1020501;1020899;1021128;1021317;1021455;1022180;1026609	1012392;1013086;1014023;1015882;1016460;1017813;1018322;1018615;1018865;1019037;1019227;1020155;1020418;1020819;1021025;1021235;1021388;1021678;1022275;1026800	-;-;-;-;-;-;-;-;-;-;-;-;-;-;-;-;-;-;-;-	2667	738	967	556	760	676	1196	505	1012	1036	873	762	555	794	863	1011	855	1069	800	666	872	587	714	880	781	786	944	572	697	369	622
ENSONIG00000009215	GL831134.1;GL831134.1;GL831134.1;GL831134.1;GL831134.1;GL831134.1;GL831134.1;GL831134.1;GL831134.1;GL831134.1;GL831134.1;GL831134.1;GL831134.1;GL831134.1;GL831134.1;GL831134.1;GL831134.1;GL831134.1;GL831134.1;GL831134.1;GL831134.1;GL831134.1;GL831134.1;GL831134.1;GL831134.1;GL831134.1;GL831134.1;GL831134.1;GL831134.1;GL831134.1;GL831134.1;GL831134.1;GL831134.1;GL831134.1;GL831134.1;GL831134.1;GL8…	1033523;1033913;1033923;1033940;1033958;1034357;1034357;1034357;1034357;1034680;1034680;1034680;1034680;1034936;1034936;1034936;1034936;1035101;1035101;1035101;1035101;1037717;1037717;1037717;1037717;1038047;1038047;1038047;1038047;1038210;1038210;1038210;1038210;1039278;1039278;1039278;1039278;1039507;1039507;1039507;1039507;1039659;1039659;1039659;1039659;1040112;1040112;1040112;1040112;1040353…	1033556;1034182;1034182;1034182;1034182;1034412;1034412;1034412;1034412;1034702;1034702;1034702;1034702;1034972;1034972;1034972;1034972;1035264;1035264;1035264;1035264;1037822;1037822;1037822;1037822;1038085;1038085;1038085;1038085;1038297;1038297;1038297;1038297;1039403;1039403;1039403;1039403;1039574;1039574;1039574;1039574;1039718;1039718;1039718;1039718;1040256;1040256;1040256;1040256;1040489…	-;-;-;-;-;-;-;-;-;-;-;-;-;-;-;-;-;-;-;-;-;-;-;-;-;-;-;-;-;-;-;-;-;-;-;-;-;-;-;-;-;-;-;-;-;-;-;-;-;-;-;-;-;-;-;-;-;-;-;-;-;-;-;-;-;-;-;-;-;-;-;-;-;-;-;-;-;-;-;-;-;-;-;-;-;-;-;-;-;-;-;-;-;-;-;-;-;-;-;-;-;-;-;-;-;-;-;-;-;-;-;-;-;-;-;-;-;-;-;-;-;-;-;-;-;-;-;-	5239	488	533	260	384	416	668	324	498	482	389	512	273	514	572	458	465	423	373	326	392	245	416	540	370	729	480	329	361	186	469
ENSONIG00000009221	GL831134.1;GL831134.1;GL831134.1;GL831134.1	1057608;1059227;1059607;1059935	1057886;1059434;1059768;1063465	+;+;+;+	4180	26	42	12	34	48	28	22	16	32	46	25	23	35	36	46	32	13	16	11	21	32	40	35	29	19	8	20	13	12	15
ENSONIG00000009222	GL831134.1;GL831134.1;GL831134.1;GL831134.1;GL831134.1;GL831134.1;GL831134.1;GL831134.1;GL831134.1;GL831134.1;GL831134.1;GL831134.1;GL831134.1;GL831134.1;GL831134.1;GL831134.1	1059169;1061515;1061702;1061702;1061861;1061861;1062055;1062055;1062255;1062255;1062427;1062427;1063166;1063166;1063250;1064666	1061604;1061604;1061764;1061764;1061968;1061968;1062168;1062168;1062337;1062337;1062555;1062555;1063218;1063465;1063274;1064714	-;-;-;-;-;-;-;-;-;-;-;-;-;-;-;-	3282	1	6	0	1	2	0	4	0	2	0	1	2	1	3	2	0	0	0	1	1	0	3	7	1	1	0	1	2	1	0
ENSONIG00000009226	GL831134.1;GL831134.1;GL831134.1;GL831134.1;GL831134.1;GL831134.1;GL831134.1;GL831134.1	1067689;1068928;1074069;1074627;1074962;1076573;1076709;1077170	1068599;1069043;1074177;1074698;1075055;1076619;1076813;1077440	-;-;-;-;-;-;-;-	1725	1647	2351	1237	2184	2368	3293	1589	2611	2037	1871	2686	1539	2312	2178	3226	2229	2389	1675	1322	1720	1881	2183	2374	1808	3561	1835	1611	1612	841	1456
ENSONIG00000009229	GL831134.1;GL831134.1;GL831134.1;GL831134.1	1078992;1085938;1086984;1087464	1083552;1086290;1087332;1087742	-;-;-;-	5542	653	1083	438	866	769	1009	623	918	713	737	488	398	887	788	855	548	1028	630	607	580	524	421	752	566	780	528	542	600	323	533
ENSONIG00000009230	GL831134.1;GL831134.1;GL831134.1;GL831134.1;GL831134.1;GL831134.1;GL831134.1;GL831134.1;GL831134.1;GL831134.1;GL831134.1;GL831134.1;GL831134.1	1103012;1110232;1111847;1113653;1114041;1120360;1122494;1123592;1124760;1126133;1126876;1127555;1130605	1103081;1110345;1111948;1113778;1114219;1120552;1122591;1123651;1124864;1126246;1126965;1127654;1130708	-;-;-;-;-;-;-;-;-;-;-;-;-	1455	6803	9701	5417	7763	7754	11516	6518	9462	7923	7470	8122	5408	8031	7909	10202	7853	9588	6686	5034	6769	5919	6317	7686	6822	12774	7660	5618	6218	3912	6138
ENSONIG00000009235	GL831134.1;GL831134.1;GL831134.1;GL831134.1;GL831134.1	1138709;1141027;1142587;1142761;1143668	1139373;1141193;1142661;1142995;1143856	+;+;+;+;+	1331	181	276	124	210	314	333	131	227	231	167	195	214	256	227	259	243	231	209	155	180	188	226	297	236	243	180	174	178	115	158
ENSONIG00000009237	GL831134.1;GL831134.1;GL831134.1;GL831134.1;GL831134.1;GL831134.1;GL831134.1;GL831134.1;GL831134.1;GL831134.1;GL831134.1	1148894;1149139;1149437;1150162;1150334;1150826;1151848;1152775;1153039;1153230;1155959	1148971;1149285;1149580;1150229;1150482;1150928;1151903;1152808;1153144;1153292;1156033	-;-;-;-;-;-;-;-;-;-;-	1023	763	1184	542	939	951	1312	751	1112	876	842	1091	711	1014	982	1193	1023	1152	811	642	733	796	858	929	735	1282	790	806	675	476	749
ENSONIG00000026216	GL831134.1;GL831134.1	1164531;1166893	1166379;1170448	+;+	5405	22	14	11	28	6	33	10	18	8	21	6	14	27	29	27	4	8	22	32	25	14	21	10	26	28	5	6	4	6	13
ENSONIG00000026715	GL831134.1;GL831134.1	1164531;1166903	1166389;1167170	-;-	2127	0	0	0	0	0	0	0	0	0	0	0	0	0	0	0	0	0	0	0	0	0	0	0	0	0	0	0	0	0	0
ENSONIG00000009246	GL831134.1;GL831134.1;GL831134.1;GL831134.1;GL831134.1;GL831134.1;GL831134.1;GL831134.1;GL831134.1	1177050;1177846;1179636;1180002;1180778;1181074;1181413;1181533;1181716	1177576;1177906;1179731;1180166;1180903;1181294;1181456;1181618;1181757	+;+;+;+;+;+;+;+;+	1368	780	1284	649	1270	993	1244	900	1230	820	824	1149	955	1120	1088	1903	946	1263	748	621	691	985	855	1194	1068	1416	1007	684	806	535	855
ENSONIG00000009251	GL831134.1;GL831134.1;GL831134.1;GL831134.1;GL831134.1;GL831134.1;GL831134.1;GL831134.1;GL831134.1;GL831134.1;GL831134.1;GL831134.1;GL831134.1;GL831134.1;GL831134.1;GL831134.1;GL831134.1;GL831134.1	1198377;1214078;1214758;1260581;1264020;1266179;1266472;1267051;1269084;1270739;1271347;1275594;1277303;1278286;1280656;1281343;1282579;1284331	1198812;1214125;1214923;1260694;1264202;1266245;1266588;1267191;1269184;1270867;1271448;1275714;1277384;1278406;1280831;1281576;1282641;1287680	+;+;+;+;+;+;+;+;+;+;+;+;+;+;+;+;+;+	5751	2915	4719	2432	3378	2802	3779	2457	3315	3070	2969	3046	2014	3238	3405	3518	2869	3072	2845	2241	2937	2323	2825	2820	2613	3419	2494	2650	2501	1462	2123
ENSONIG00000009263	GL831134.1;GL831134.1	1302182;1303105	1302749;1306325	+;+	3789	1226	1854	778	1528	1484	2386	982	1856	1589	1087	1700	1051	1717	1752	2140	1295	1697	1311	1308	1193	1250	1460	1656	1365	2430	1338	1589	1288	668	1335
ENSONIG00000021424	GL831134.1	1324475	1325458	-	984	1	1	0	0	0	0	2	16	9	0	8	5	0	2	0	2	4	0	2	2	0	0	4	1	8	5	0	0	1	0
ENSONIG00000021425	GL831134.1	1332834	1333844	-	1011	5	18	7	13	4	14	11	31	13	16	9	3	9	10	18	11	8	8	5	5	5	4	10	7	24	6	7	16	2	17
ENSONIG00000024555	GL831134.1;GL831134.1;GL831134.1;GL831134.1;GL831134.1	1337527;1337527;1339383;1339718;1339719	1339611;1337920;1339612;1339883;1339883	-;-;-;-;-	2252	16	9	6	25	19	7	16	8	20	5	6	4	20	15	12	7	9	13	7	19	4	10	11	10	19	9	5	5	7	8
ENSONIG00000009264	GL831134.1;GL831134.1;GL831134.1;GL831134.1;GL831134.1;GL831134.1;GL831134.1;GL831134.1	1456103;1456184;1457253;1457349;1458184;1458704;1459034;1460262	1456916;1456528;1457303;1457391;1459242;1459230;1459149;1460303	-;-;-;-;-;-;-;-	2009	15	23	4	22	10	29	10	41	37	16	38	16	21	19	30	29	31	16	17	22	18	15	15	20	27	9	14	16	7	29
ENSONIG00000021426	GL831134.1	1477292	1478314	-	1023	35	47	43	48	29	54	26	56	24	25	27	27	44	35	65	33	43	50	15	27	28	43	66	28	61	30	24	37	27	27
ENSONIG00000021427	GL831134.1	1480024	1481067	-	1044	3	14	9	13	8	26	14	16	17	15	29	20	23	24	31	21	16	17	15	12	35	19	24	11	20	7	14	22	12	22
ENSONIG00000009266	GL831134.1;GL831134.1;GL831134.1;GL831134.1;GL831134.1;GL831134.1;GL831134.1;GL831134.1;GL831134.1;GL831134.1;GL831134.1;GL831134.1;GL831134.1;GL831134.1;GL831134.1;GL831134.1;GL831134.1;GL831134.1;GL831134.1;GL831134.1;GL831134.1;GL831134.1;GL831134.1;GL831134.1;GL831134.1;GL831134.1;GL831134.1;GL831134.1;GL831134.1;GL831134.1;GL831134.1;GL831134.1;GL831134.1;GL831134.1;GL831134.1;GL831134.1;GL8…	1484170;1484874;1484897;1484897;1485941;1485941;1485941;1487093;1487093;1487093;1488457;1488457;1488457;1492025;1492025;1492025;1493556;1493556;1493556;1493760;1493834;1493834;1494380;1494395;1494600;1494600;1494930;1495006;1496883;1498754;1498754;1498769;1500089;1500089;1500116;1500581;1500581;1500581;1501120;1501120;1501120;1502592;1502592;1502592;1502958;1502958;1502958;1503586;1503669;1503669…	1484342;1484957;1484957;1484957;1486047;1486047;1486047;1487218;1487218;1487218;1488563;1488563;1488563;1492168;1492168;1492168;1493702;1493702;1493652;1496189;1494328;1494313;1494566;1494566;1494852;1494866;1496189;1496189;1496918;1498846;1498846;1498846;1500207;1500207;1500207;1500748;1500748;1500748;1501260;1501260;1501260;1502800;1502800;1502800;1503099;1503099;1503099;1503624;1503773;1503773…	+;+;+;+;+;+;+;+;+;+;+;+;+;+;+;+;+;+;+;+;+;+;+;+;+;+;+;+;+;+;+;+;+;+;+;+;+;+;+;+;+;+;+;+;+;+;+;+;+;+;+;+;+;+;+;+;+;+;+;+	7627	715	973	509	951	1079	1131	618	1023	821	762	657	637	827	797	1245	697	818	693	654	660	610	767	912	807	856	844	717	573	344	748
ENSONIG00000009271	GL831134.1;GL831134.1;GL831134.1;GL831134.1;GL831134.1;GL831134.1;GL831134.1;GL831134.1;GL831134.1;GL831134.1;GL831134.1;GL831134.1;GL831134.1	1552849;1553658;1557542;1557748;1557928;1559581;1560915;1562896;1564003;1564380;1566962;1568615;1570018	1552896;1553751;1557652;1557848;1558025;1559713;1561068;1562956;1564072;1564471;1567091;1568656;1570250	+;+;+;+;+;+;+;+;+;+;+;+;+	1367	5063	8749	3877	5415	6255	8704	4711	6024	4942	6038	6021	3669	5466	6260	6483	5213	5929	4834	3864	4502	4249	5281	5244	4772	5901	4540	4827	4168	2819	4597
ENSONIG00000009284	GL831134.1;GL831134.1;GL831134.1;GL831134.1;GL831134.1;GL831134.1;GL831134.1;GL831134.1;GL831134.1;GL831134.1;GL831134.1;GL831134.1;GL831134.1;GL831134.1;GL831134.1;GL831134.1;GL831134.1	1580882;1581217;1581590;1589058;1593266;1594349;1594545;1600308;1602014;1602434;1602927;1603724;1603942;1605505;1608218;1609549;1609775	1580923;1581357;1581631;1589187;1593360;1594418;1594605;1600461;1602146;1602531;1603042;1603740;1603984;1605612;1608258;1609626;1609809	-;-;-;-;-;-;-;-;-;-;-;-;-;-;-;-;-	1404	11	7	0	10	4	10	7	0	6	15	0	1	9	6	4	12	4	6	10	9	5	7	4	3	6	15	15	4	4	6
ENSONIG00000024152	GL831134.1;GL831134.1	1627896;1629520	1628754;1629738	-;-	1078	4	15	0	0	2	5	2	2	1	2	0	2	13	4	3	1	2	0	0	0	2	3	12	4	0	2	6	0	3	1
ENSONIG00000009294	GL831134.1;GL831134.1;GL831134.1;GL831134.1;GL831134.1;GL831134.1;GL831134.1;GL831134.1;GL831134.1;GL831134.1;GL831134.1;GL831134.1;GL831134.1;GL831134.1	1636355;1640287;1640294;1641961;1642815;1642815;1643756;1643756;1644211;1644211;1644666;1644666;1645425;1645425	1636751;1640410;1640410;1641999;1642893;1642893;1643850;1643850;1644399;1644399;1644860;1644860;1645463;1648225	+;+;+;+;+;+;+;+;+;+;+;+;+;+	3919	269	366	185	367	358	411	308	590	314	304	443	411	589	346	569	450	393	315	193	287	388	354	455	522	229	333	230	285	189	305
ENSONIG00000009298	GL831134.1;GL831134.1;GL831134.1;GL831134.1;GL831134.1;GL831134.1;GL831134.1;GL831134.1;GL831134.1;GL831134.1;GL831134.1;GL831134.1;GL831134.1;GL831134.1;GL831134.1	1645629;1645629;1646233;1646233;1646375;1646541;1646541;1647681;1647681;1648020;1649415;1651910;1653497;1654711;1658670	1646155;1646155;1646292;1646292;1646422;1646700;1646700;1647914;1647914;1648106;1650760;1652002;1653604;1654806;1659269	-;-;-;-;-;-;-;-;-;-;-;-;-;-;-	3359	341	457	263	434	438	529	289	441	409	356	478	279	415	543	609	409	481	353	297	260	341	418	440	425	457	424	323	347	157	308
ENSONIG00000009303	GL831134.1;GL831134.1	1666392;1667799	1667654;1668303	-;-	1768	868	1350	715	1450	1303	1669	930	1226	1105	1322	1544	997	1196	1507	1336	1084	1183	911	847	921	1149	1094	1408	1117	922	1080	779	780	624	930
ENSONIG00000009304	GL831134.1;GL831134.1;GL831134.1	1670331;1671297;1673501	1671213;1671804;1673593	-;-;-	1484	135	223	156	237	183	263	217	279	166	164	306	133	229	206	291	264	252	196	130	211	189	235	234	199	229	249	116	204	100	179
ENSONIG00000009305	GL831134.1;GL831134.1;GL831134.1;GL831134.1;GL831134.1;GL831134.1	1705850;1710570;1712128;1712332;1717660;1722063	1706362;1710649;1712232;1712448;1717847;1722224	-;-;-;-;-;-	1165	0	4	3	0	3	2	0	4	3	0	8	5	1	4	3	6	3	0	0	0	9	2	1	0	0	0	0	1	2	0
ENSONIG00000009307	GL831134.1;GL831134.1;GL831134.1;GL831134.1;GL831134.1;GL831134.1;GL831134.1	1734886;1746603;1768407;1777581;1833933;1835792;1908422	1735036;1746707;1768529;1777768;1834049;1835910;1909438	-;-;-;-;-;-;-	1820	462	683	285	417	464	578	424	484	485	519	416	321	388	565	493	442	554	398	319	347	353	570	440	580	376	432	452	381	197	383
ENSONIG00000009310	GL831134.1;GL831134.1;GL831134.1;GL831134.1;GL831134.1;GL831134.1;GL831134.1;GL831134.1	1937507;1941135;1943107;1943343;1943594;1944880;1946779;1947617	1939690;1941325;1943158;1943412;1943671;1944963;1946827;1948126	-;-;-;-;-;-;-;-	3218	6608	11575	5351	9480	9027	14070	6992	10559	8758	7659	9954	6473	9830	10467	11756	8277	10271	7940	6561	7913	7368	8150	9485	8258	11727	7576	7222	6647	4238	7301
ENSONIG00000009314	GL831134.1;GL831134.1;GL831134.1;GL831134.1;GL831134.1	1979252;1985342;1994103;1994339;1996090	1979504;1985466;1994238;1994577;1996470	+;+;+;+;+	1134	41	81	51	82	63	64	38	90	80	51	76	37	61	65	107	53	56	53	59	24	72	91	126	51	60	82	51	58	39	57
ENSONIG00000026165	GL831134.1;GL831134.1;GL831134.1	2016870;2025937;2075690	2017008;2026072;2075773	-;-;-	359	0	0	0	0	0	0	0	0	0	0	0	0	0	0	0	0	0	1	0	0	0	0	0	0	0	0	0	0	0	0
ENSONIG00000021961	GL831134.1	2066029	2066124	+	96	0	0	0	0	0	0	0	0	0	0	0	0	0	0	0	0	0	0	0	0	0	0	0	0	0	0	0	0	0	0
ENSONIG00000021942	GL831134.1	2066899	2066989	+	91	0	0	0	0	0	0	0	0	0	0	0	0	0	0	0	0	0	0	0	0	0	0	0	0	0	0	0	0	0	0
ENSONIG00000022219	GL831134.1	2069066	2069171	+	106	0	0	0	0	0	0	0	0	0	0	0	0	0	0	0	0	0	0	0	0	0	0	0	0	0	0	0	0	0	0
ENSONIG00000009316	GL831134.1;GL831134.1;GL831134.1;GL831134.1;GL831134.1	2083274;2083500;2083801;2084063;2087419	2083422;2083702;2083884;2084145;2087463	-;-;-;-;-	564	189	233	123	243	184	281	172	218	174	209	195	150	223	220	397	216	191	165	135	184	156	151	266	228	268	164	202	149	107	198
ENSONIG00000009320	GL831134.1;GL831134.1;GL831134.1;GL831134.1;GL831134.1;GL831134.1;GL831134.1;GL831134.1;GL831134.1;GL831134.1;GL831134.1;GL831134.1;GL831134.1;GL831134.1;GL831134.1	2089072;2089296;2089571;2090506;2090655;2090869;2091141;2091343;2091631;2092510;2092918;2093482;2093689;2094097;2094319	2089169;2089437;2089645;2090577;2090771;2091054;2091250;2091478;2091741;2092614;2093076;2093582;2093836;2094222;2094465	+;+;+;+;+;+;+;+;+;+;+;+;+;+;+	1833	13	8	32	39	10	30	32	40	35	16	49	13	33	39	64	23	29	32	12	39	23	9	38	20	38	18	16	29	19	20
ENSONIG00000009325	GL831134.1;GL831134.1;GL831134.1;GL831134.1;GL831134.1	2097607;2098526;2098824;2099271;2099565	2098426;2098722;2099171;2099475;2099999	-;-;-;-;-	2005	164	264	179	186	445	428	278	436	317	305	217	170	299	191	428	239	286	325	197	230	370	445	349	326	363	351	308	180	140	201
ENSONIG00000009330	GL831134.1;GL831134.1;GL831134.1	2104160;2105298;2105714	2104895;2105586;2106927	+;+;+	2239	43	130	69	96	83	118	58	91	143	97	48	40	62	65	146	46	99	90	33	34	92	55	98	87	137	75	49	54	51	62
ENSONIG00000009331	GL831134.1;GL831134.1;GL831134.1;GL831134.1;GL831134.1;GL831134.1;GL831134.1;GL831134.1;GL831134.1;GL831134.1;GL831134.1;GL831134.1	2107758;2108063;2108330;2108714;2108871;2109083;2110709;2111439;2111714;2111914;2112150;2112473	2107964;2108230;2108483;2108795;2108967;2109182;2110821;2111588;2111815;2112036;2112356;2113575	+;+;+;+;+;+;+;+;+;+;+;+	2606	0	12	5	2	0	0	0	0	0	0	0	0	0	1	0	0	0	0	0	0	3	6	0	0	0	5	0	0	0	0
ENSONIG00000009335	GL831134.1;GL831134.1;GL831134.1;GL831134.1;GL831134.1;GL831134.1;GL831134.1;GL831134.1;GL831134.1;GL831134.1;GL831134.1;GL831134.1;GL831134.1;GL831134.1;GL831134.1;GL831134.1;GL831134.1	2115003;2116116;2116465;2116894;2117628;2117837;2118055;2118220;2120011;2120297;2120800;2121074;2122462;2122770;2123460;2123524;2125266	2115294;2116243;2116628;2117103;2117738;2117972;2118130;2118400;2120161;2120433;2120973;2121191;2122615;2122836;2123603;2123604;2125391	+;+;+;+;+;+;+;+;+;+;+;+;+;+;+;+;+	2370	300	470	225	340	396	431	303	383	316	326	468	346	383	423	587	398	332	360	227	252	340	365	490	399	429	378	367	290	175	241
ENSONIG00000009338	GL831134.1;GL831134.1;GL831134.1;GL831134.1;GL831134.1;GL831134.1;GL831134.1;GL831134.1;GL831134.1;GL831134.1;GL831134.1;GL831134.1	2128738;2133734;2137869;2138137;2138395;2139625;2140265;2140433;2140766;2142269;2143483;2143894	2129114;2133920;2137958;2138245;2138528;2139868;2140344;2140569;2140940;2142424;2143595;2145707	+;+;+;+;+;+;+;+;+;+;+;+	3616	1743	2541	1363	1940	1992	3221	1574	2803	2039	2003	2377	1514	2143	2325	2627	2020	3005	2056	1381	1916	1773	2007	2051	1953	2833	2301	1743	1761	934	1731
ENSONIG00000009347	GL831134.1;GL831134.1	2129432;2130552	2130527;2130718	+;+	1263	54	82	35	79	74	127	43	60	80	93	69	94	72	85	64	74	80	65	35	46	83	70	64	81	65	52	90	55	30	74
ENSONIG00000009348	GL831134.1;GL831134.1	2161832;2163575	2163252;2163754	+;+	1601	158	322	165	160	354	226	211	237	176	284	124	218	511	176	172	148	358	291	85	120	142	196	129	380	186	258	157	136	62	193
ENSONIG00000009349	GL831134.1;GL831134.1;GL831134.1;GL831134.1	2165445;2165951;2167277;2167868	2165655;2166091;2167542;2168333	-;-;-;-	1084	129	148	70	101	65	125	81	148	110	78	109	72	135	119	122	55	100	81	57	67	105	123	94	117	134	118	73	83	39	87
ENSONIG00000025451	GL831134.1;GL831134.1	2176866;2177172	2177051;2177285	+;+	300	1	0	0	0	3	2	7	2	1	8	0	1	5	0	1	0	2	5	0	0	0	2	1	0	3	4	1	1	1	0
ENSONIG00000009351	GL831134.1;GL831134.1;GL831134.1;GL831134.1;GL831134.1;GL831134.1;GL831134.1;GL831134.1	2191895;2192615;2195436;2198109;2198336;2198984;2201265;2202666	2192256;2192730;2195586;2198247;2198553;2199145;2201569;2203201	-;-;-;-;-;-;-;-	1989	1838	2803	1271	2053	2127	2833	1628	2010	1742	2140	2291	1368	2029	2002	2259	1846	2043	1647	1300	1472	1653	1981	2232	1818	1965	1575	1815	1464	993	1600
ENSONIG00000024441	GL831134.1;GL831134.1	2278627;2282269	2282131;2282414	-;-	3651	27	57	29	32	11	25	17	44	28	30	23	24	41	34	33	17	24	18	16	18	29	26	37	62	39	30	27	27	5	29
ENSONIG00000009358	GL831134.1;GL831134.1;GL831134.1;GL831134.1;GL831134.1;GL831134.1;GL831134.1;GL831134.1;GL831134.1;GL831134.1;GL831134.1;GL831134.1;GL831134.1;GL831134.1;GL831134.1;GL831134.1;GL831134.1;GL831134.1;GL831134.1;GL831134.1;GL831134.1;GL831134.1;GL831134.1;GL831134.1;GL831134.1;GL831134.1	2386448;2388332;2388958;2389031;2390136;2391282;2392236;2392450;2392606;2392847;2393210;2393756;2394404;2396535;2396719;2396971;2397745;2399237;2399846;2401227;2402333;2403280;2403491;2406176;2406347;2408049	2386600;2388419;2389009;2389238;2390277;2391398;2392362;2392523;2392693;2393046;2393342;2393846;2394561;2396573;2396863;2397093;2397843;2399422;2400001;2401302;2402479;2403377;2403658;2406223;2406440;2408380	+;+;+;+;+;+;+;+;+;+;+;+;+;+;+;+;+;+;+;+;+;+;+;+;+;+	3342	135	402	197	274	160	293	118	330	221	146	135	136	296	257	314	233	234	170	118	165	142	215	267	259	238	275	205	145	91	146
ENSONIG00000009389	GL831134.1;GL831134.1;GL831134.1;GL831134.1;GL831134.1;GL831134.1;GL831134.1;GL831134.1;GL831134.1;GL831134.1;GL831134.1;GL831134.1;GL831134.1;GL831134.1;GL831134.1;GL831134.1;GL831134.1;GL831134.1;GL831134.1;GL831134.1;GL831134.1;GL831134.1;GL831134.1;GL831134.1;GL831134.1;GL831134.1;GL831134.1;GL831134.1;GL831134.1;GL831134.1;GL831134.1;GL831134.1;GL831134.1;GL831134.1;GL831134.1;GL831134.1;GL8…	2411226;2412170;2413881;2413882;2414156;2414156;2414601;2414601;2414945;2414945;2415234;2415234;2416431;2416431;2416618;2416618;2417472;2417472;2418026;2418026;2419691;2419691;2419879;2419879;2420306;2420306;2420956;2420956;2421519;2421519;2422073;2422073;2422333;2422333;2422689;2422689;2423051;2423051;2423595;2423595;2423827;2423827;2424750;2424750;2426226;2426226;2426748;2426748;2426989;2426989	2411407;2412222;2414013;2414013;2414262;2414262;2414746;2414746;2415112;2415112;2415483;2415483;2416513;2416513;2416988;2416988;2417698;2417698;2418126;2418126;2419793;2419793;2420068;2420068;2420488;2420488;2421070;2421070;2421646;2421646;2422207;2422207;2422422;2422422;2422879;2422879;2423166;2423166;2423724;2423724;2424012;2424012;2424981;2424981;2426339;2426339;2426910;2426910;2427071;2430459	+;+;+;+;+;+;+;+;+;+;+;+;+;+;+;+;+;+;+;+;+;+;+;+;+;+;+;+;+;+;+;+;+;+;+;+;+;+;+;+;+;+;+;+;+;+;+;+;+;+	7368	701	1198	675	768	675	1190	654	1097	962	867	884	646	1080	936	1039	813	1031	807	741	670	651	873	985	858	977	851	836	675	339	619
ENSONIG00000009402	GL831134.1;GL831134.1;GL831134.1;GL831134.1;GL831134.1;GL831134.1;GL831134.1;GL831134.1;GL831134.1;GL831134.1;GL831134.1;GL831134.1;GL831134.1;GL831134.1;GL831134.1;GL831134.1;GL831134.1;GL831134.1;GL831134.1	2432102;2434311;2435418;2435418;2435742;2435742;2438628;2438628;2440117;2440117;2442310;2442310;2445109;2446230;2446230;2448017;2448017;2455589;2455589	2434451;2434451;2435625;2435625;2435848;2435848;2438731;2438731;2440273;2440273;2442409;2442409;2445186;2446322;2446322;2448088;2448088;2456079;2456800	-;-;-;-;-;-;-;-;-;-;-;-;-;-;-;-;-;-;-	4481	519	803	393	675	583	977	565	660	895	555	702	585	709	701	925	567	841	694	415	534	601	631	618	685	874	739	625	523	391	493
ENSONIG00000023435	GL831134.1;GL831134.1;GL831134.1	2498472;2501363;2503341	2498609;2501422;2503521	-;-;-	379	0	0	0	0	0	0	0	0	0	0	0	0	0	0	0	0	0	0	0	0	0	0	0	0	0	0	0	0	0	0
ENSONIG00000009406	GL831134.1;GL831134.1;GL831134.1;GL831134.1;GL831134.1;GL831134.1	2506414;2507035;2507235;2507446;2508294;2509056	2506575;2507132;2507322;2507571;2508466;2509893	-;-;-;-;-;-	1485	0	6	0	0	1	0	0	0	0	0	0	0	0	0	6	0	0	0	2	0	0	0	4	0	0	0	0	0	0	0
ENSONIG00000009408	GL831134.1;GL831134.1;GL831134.1;GL831134.1;GL831134.1;GL831134.1;GL831134.1;GL831134.1;GL831134.1;GL831134.1;GL831134.1;GL831134.1;GL831134.1;GL831134.1;GL831134.1;GL831134.1;GL831134.1;GL831134.1;GL831134.1;GL831134.1;GL831134.1;GL831134.1;GL831134.1;GL831134.1	2535942;2536294;2537109;2538217;2539279;2539497;2539666;2540839;2543281;2543915;2545304;2573605;2574376;2574716;2575647;2575913;2577054;2578459;2579008;2580120;2584608;2588726;2589743;2590362	2536082;2536394;2537180;2538245;2539369;2539575;2539855;2541020;2543439;2544001;2545436;2573756;2574573;2574823;2575780;2576057;2577237;2578663;2579074;2580224;2584737;2588897;2589957;2590676	-;-;-;-;-;-;-;-;-;-;-;-;-;-;-;-;-;-;-;-;-;-;-;-	3394	472	799	301	510	496	478	491	285	296	561	643	665	646	661	511	619	204	336	205	220	633	638	756	824	136	246	351	285	251	384
ENSONIG00000022109	GL831134.1	2564650	2564739	+	90	0	2	2	4	2	3	1	1	6	1	5	1	2	4	5	3	0	2	0	1	1	7	1	1	1	0	4	2	0	1
ENSONIG00000021473	GL831134.1	2568189	2568275	+	87	0	0	0	1	3	0	1	0	0	0	0	0	0	0	0	3	0	0	1	0	0	0	1	0	0	0	1	0	0	0
ENSONIG00000009410	GL831134.1;GL831134.1;GL831134.1;GL831134.1;GL831134.1;GL831134.1;GL831134.1;GL831134.1;GL831134.1	2593520;2596408;2598267;2599706;2604310;2604847;2608546;2608682;2608991	2594046;2596571;2598449;2599751;2604422;2605020;2608594;2608847;2612716	+;+;+;+;+;+;+;+;+	5148	2003	3146	1383	2820	2556	3435	1706	2973	2593	2480	2189	1561	2596	3084	2763	2209	2622	1722	1978	1724	1976	2404	3129	2186	1770	2253	2024	1976	1247	2149
ENSONIG00000009411	GL831134.1;GL831134.1;GL831134.1;GL831134.1;GL831134.1;GL831134.1;GL831134.1;GL831134.1;GL831134.1;GL831134.1;GL831134.1;GL831134.1;GL831134.1;GL831134.1;GL831134.1;GL831134.1;GL831134.1;GL831134.1;GL831134.1;GL831134.1;GL831134.1;GL831134.1;GL831134.1;GL831134.1;GL831134.1;GL831134.1;GL831134.1;GL831134.1;GL831134.1;GL831134.1;GL831134.1;GL831134.1;GL831134.1;GL831134.1;GL831134.1;GL831134.1;GL8…	2616343;2619098;2619918;2619918;2620673;2620673;2620970;2620970;2621196;2621196;2621546;2621546;2622945;2622945;2623253;2623253;2623515;2623515;2623760;2623760;2624024;2624024;2624285;2624285;2624682;2625069;2625069;2625439;2625439;2625869;2625869;2626335;2626335;2626938;2626938;2628104;2628104;2628362;2628362;2629254;2629254;2629739;2629739;2629951;2629951;2630346;2630346;2631503;2631503;2633214…	2619261;2619261;2620056;2620056;2620873;2620873;2621114;2621114;2621432;2621423;2621708;2621708;2623149;2623149;2623414;2623414;2623654;2623654;2623906;2623906;2624126;2624126;2624636;2624844;2624844;2625301;2625301;2625554;2625554;2626211;2626211;2626471;2626471;2627127;2627127;2628284;2628284;2628559;2628559;2629388;2629388;2629867;2629867;2630253;2630250;2630531;2630531;2631640;2631640;2633339…	-;-;-;-;-;-;-;-;-;-;-;-;-;-;-;-;-;-;-;-;-;-;-;-;-;-;-;-;-;-;-;-;-;-;-;-;-;-;-;-;-;-;-;-;-;-;-;-;-;-;-;-;-;-;-;-;-;-;-;-;-;-;-;-;-;-;-;-;-	8700	594	1056	421	744	995	955	603	797	794	734	777	571	919	774	668	787	938	540	452	570	568	920	985	815	415	637	593	503	388	500
ENSONIG00000009417	GL831134.1;GL831134.1;GL831134.1;GL831134.1;GL831134.1;GL831134.1;GL831134.1;GL831134.1;GL831134.1;GL831134.1;GL831134.1;GL831134.1;GL831134.1;GL831134.1;GL831134.1;GL831134.1;GL831134.1;GL831134.1;GL831134.1;GL831134.1;GL831134.1;GL831134.1;GL831134.1;GL831134.1;GL831134.1;GL831134.1;GL831134.1;GL831134.1;GL831134.1;GL831134.1;GL831134.1;GL831134.1	2665353;2675369;2676993;2677211;2677472;2678756;2679926;2680154;2680516;2681843;2682494;2682655;2683189;2683429;2684870;2685066;2685550;2685767;2686452;2686712;2687524;2687672;2687950;2688236;2688411;2688606;2688883;2690680;2690845;2691064;2691277;2692064	2665451;2675450;2677093;2677348;2677647;2678840;2680070;2680298;2680607;2682002;2682566;2682743;2683237;2683564;2684961;2685321;2685662;2685917;2686612;2686896;2687593;2687775;2688115;2688329;2688499;2688797;2689048;2690750;2690933;2691142;2691538;2692275	+;+;+;+;+;+;+;+;+;+;+;+;+;+;+;+;+;+;+;+;+;+;+;+;+;+;+;+;+;+;+;+	4122	625	1389	558	960	894	1459	618	998	940	1068	816	510	810	1127	1118	761	988	848	610	748	656	796	981	827	1022	869	752	728	386	838
ENSONIG00000009436	GL831134.1;GL831134.1;GL831134.1;GL831134.1;GL831134.1;GL831134.1;GL831134.1;GL831134.1;GL831134.1;GL831134.1;GL831134.1;GL831134.1;GL831134.1;GL831134.1;GL831134.1;GL831134.1	2695177;2696266;2696682;2696810;2697913;2698125;2698262;2698514;2698691;2698938;2700678;2700850;2701030;2701256;2703384;2703601	2695402;2696411;2696714;2696914;2698016;2698183;2698392;2698594;2698773;2699052;2700743;2700942;2701158;2701316;2703491;2703746	+;+;+;+;+;+;+;+;+;+;+;+;+;+;+;+	1686	1443	2106	922	1679	1606	2443	1361	1997	1652	1600	1763	1182	1582	1858	2324	1680	1787	1552	1248	1475	1478	1637	1821	1400	2260	1629	1267	1261	836	1464
ENSONIG00000009440	GL831134.1;GL831134.1;GL831134.1;GL831134.1;GL831134.1;GL831134.1;GL831134.1;GL831134.1;GL831134.1;GL831134.1;GL831134.1;GL831134.1;GL831134.1;GL831134.1;GL831134.1;GL831134.1;GL831134.1;GL831134.1;GL831134.1;GL831134.1;GL831134.1;GL831134.1;GL831134.1;GL831134.1;GL831134.1;GL831134.1;GL831134.1;GL831134.1;GL831134.1;GL831134.1;GL831134.1;GL831134.1;GL831134.1;GL831134.1;GL831134.1;GL831134.1;GL8…	2704318;2704528;2704864;2706839;2706839;2707016;2707016;2707327;2707327;2707499;2707499;2707722;2707722;2707961;2707961;2708155;2708155;2710190;2710190;2710369;2710369;2711390;2711390;2711626;2711626;2711843;2711843;2711996;2711996;2712229;2712229;2712409;2712409;2712551;2712551;2714643;2714643;2714817;2714817;2715001;2715001;2715291;2715291	2704340;2705130;2705130;2706923;2706923;2707163;2707163;2707410;2707410;2707564;2707564;2707817;2707817;2708031;2708031;2708205;2708205;2710256;2710256;2710469;2710469;2711524;2711524;2711734;2711734;2711916;2711916;2712078;2712078;2712324;2712324;2712457;2712457;2712669;2712669;2714712;2714712;2714877;2714877;2715074;2715074;2715506;2715344	-;-;-;-;-;-;-;-;-;-;-;-;-;-;-;-;-;-;-;-;-;-;-;-;-;-;-;-;-;-;-;-;-;-;-;-;-;-;-;-;-;-;-	2481	797	1226	645	1094	956	1255	665	1267	887	771	1140	644	976	968	1303	895	970	849	642	621	859	798	1000	872	853	861	774	621	393	685
ENSONIG00000009444	GL831134.1;GL831134.1;GL831134.1;GL831134.1;GL831134.1;GL831134.1	2721144;2721636;2722615;2722889;2723723;2723985	2721534;2721716;2722773;2723619;2723803;2724143	-;-;-;-;-;-	1602	60	39	63	27	28	23	12	64	36	12	41	55	38	72	45	18	72	13	8	43	93	50	71	36	112	22	5	54	11	39
ENSONIG00000009446	GL831134.1;GL831134.1;GL831134.1;GL831134.1	2730298;2731143;2731359;2732202	2730877;2731223;2731520;2732564	-;-;-;-	1186	271	529	413	489	244	465	263	419	551	309	476	519	521	489	900	301	500	619	290	237	343	349	389	295	411	257	302	466	306	386
ENSONIG00000026612	GL831134.1;GL831134.1;GL831134.1;GL831134.1	2738126;2758498;2763522;2763672	2738250;2758594;2763585;2763755	-;-;-;-	370	7	1	1	3	5	0	1	8	3	1	3	2	0	3	0	7	1	5	4	5	1	1	8	6	4	1	1	1	1	5
ENSONIG00000009453	GL831134.1;GL831134.1;GL831134.1	2765003;2765114;2765347	2765083;2765165;2765417	-;-;-	204	5	3	4	0	0	1	2	7	1	11	5	4	0	1	2	1	3	0	6	0	0	2	7	3	6	5	16	2	1	6
ENSONIG00000009454	GL831134.1;GL831134.1;GL831134.1;GL831134.1;GL831134.1;GL831134.1;GL831134.1;GL831134.1;GL831134.1;GL831134.1;GL831134.1;GL831134.1	2803227;2803573;2820910;2821921;2823920;2824137;2828681;2828842;2830175;2832835;2833478;2837993	2803441;2803692;2820995;2822027;2824037;2824290;2828741;2828914;2830260;2832970;2833519;2838133	+;+;+;+;+;+;+;+;+;+;+;+	1339	247	245	100	200	249	223	187	208	197	204	188	199	247	272	174	202	218	156	137	178	189	260	338	345	108	157	154	136	97	206
ENSONIG00000009463	GL831134.1;GL831134.1;GL831134.1;GL831134.1;GL831134.1	2844589;2844790;2845138;2845708;2847286	2844695;2844963;2845287;2845735;2847549	-;-;-;-;-	723	0	0	0	0	1	0	0	0	0	0	0	0	0	0	0	0	0	0	0	0	1	0	0	0	0	0	0	0	2	0
ENSONIG00000009467	GL831134.1;GL831134.1;GL831134.1;GL831134.1;GL831134.1;GL831134.1;GL831134.1;GL831134.1;GL831134.1;GL831134.1;GL831134.1;GL831134.1;GL831134.1;GL831134.1;GL831134.1;GL831134.1;GL831134.1;GL831134.1;GL831134.1;GL831134.1;GL831134.1;GL831134.1;GL831134.1;GL831134.1;GL831134.1;GL831134.1;GL831134.1;GL831134.1;GL831134.1	2864436;2889113;2889299;2889307;2889663;2890045;2894746;2896296;2896299;2896592;2896592;2899057;2899057;2900896;2900896;2905655;2905655;2906208;2906208;2907090;2907090;2907306;2907306;2908463;2908463;2908927;2908927;2909053;2909053	2864504;2889185;2889409;2889409;2889666;2890073;2894832;2896409;2896409;2896713;2896713;2899151;2899151;2901079;2901079;2905808;2905808;2906268;2906268;2907156;2907156;2907400;2907400;2908604;2908604;2908968;2908968;2909415;2912605	+;+;+;+;+;+;+;+;+;+;+;+;+;+;+;+;+;+;+;+;+;+;+;+;+;+;+;+;+	5002	107	209	35	62	54	149	135	89	208	56	79	40	145	151	166	92	89	63	46	63	57	162	106	95	139	35	90	59	83	86
ENSONIG00000022027	GL831134.1	2879520	2879608	-	89	0	0	0	0	0	0	0	0	0	0	0	0	0	0	0	0	0	0	0	0	0	0	0	0	0	0	0	0	0	0
ENSONIG00000022267	GL831134.1	2906035	2906118	+	84	0	0	0	0	0	0	0	0	0	0	0	0	0	0	0	0	0	0	0	0	0	0	0	0	0	0	0	0	0	0
ENSONIG00000009471	GL831134.1;GL831134.1;GL831134.1;GL831134.1;GL831134.1;GL831134.1;GL831134.1;GL831134.1	2912744;2915940;2917400;2917400;2922676;2922676;2927884;2927884	2913021;2916745;2917549;2917549;2922793;2922793;2928205;2928021	-;-;-;-;-;-;-;-	1674	9	0	2	4	2	0	1	12	19	0	5	0	4	0	8	0	6	0	0	5	0	0	0	7	4	4	12	0	1	14
ENSONIG00000009472	GL831134.1;GL831134.1;GL831134.1;GL831134.1;GL831134.1;GL831134.1;GL831134.1;GL831134.1;GL831134.1;GL831134.1;GL831134.1;GL831134.1;GL831134.1	2937350;2938487;2939034;2939257;2939740;2940773;2941105;2941323;2941534;2941706;2941950;2943190;2943704	2937431;2938549;2939143;2939463;2939916;2940943;2941209;2941439;2941617;2941848;2942098;2943393;2943993	-;-;-;-;-;-;-;-;-;-;-;-;-	1902	6	12	7	8	6	0	7	8	13	7	5	2	11	1	28	0	18	3	13	0	21	21	12	11	28	9	2	4	11	2
ENSONIG00000009474	GL831134.1;GL831134.1;GL831134.1;GL831134.1	2946870;2947047;2947325;2947739	2946922;2947181;2947399;2947766	-;-;-;-	291	468	673	379	598	521	903	665	831	666	678	881	559	803	627	771	816	774	563	421	570	611	653	630	612	576	646	385	491	354	504
ENSONIG00000021428	GL831134.1	2959664	2961199	-	1536	0	27	2	8	7	20	4	14	10	16	3	20	12	14	7	11	7	8	11	19	10	5	6	8	33	4	15	1	2	8
ENSONIG00000009477	GL831134.1;GL831134.1	3015741;3016909	3016857;3016997	+;+	1206	166	365	246	287	207	282	193	202	382	195	209	217	249	255	514	159	303	195	188	225	247	227	292	214	387	225	130	164	168	222
ENSONIG00000009479	GL831134.1;GL831134.1;GL831134.1	3019569;3024268;3025967	3019810;3024617;3026358	+;+;+	984	180	211	147	145	195	207	148	228	157	165	224	111	163	122	290	177	223	134	109	128	182	201	169	135	249	151	118	175	89	117
ENSONIG00000009480	GL831134.1;GL831134.1;GL831134.1;GL831134.1;GL831134.1;GL831134.1	3025259;3027287;3028607;3028966;3029177;3029435	3027198;3027433;3028874;3029091;3029342;3029687	-;-;-;-;-;-	2900	561	913	563	678	813	860	499	769	710	584	781	443	750	656	925	625	742	647	464	421	646	657	582	516	965	538	388	497	332	611
ENSONIG00000009481	GL831134.1;GL831134.1;GL831134.1;GL831134.1	3030536;3031187;3032000;3034921	3031061;3031695;3032124;3037200	+;+;+;+	3440	2651	4212	1968	2977	2934	3636	2137	3498	2860	2337	3204	1916	2814	3067	3331	2531	3607	2572	2175	2404	2263	2695	3010	2202	4337	2547	2614	2182	1200	2094
ENSONIG00000009482	GL831134.1;GL831134.1;GL831134.1;GL831134.1	3102089;3108583;3108988;3122637	3106196;3108845;3109247;3122941	-;-;-;-	4936	50	151	51	58	166	175	6	119	133	80	109	43	204	145	77	68	59	29	50	34	114	66	76	64	191	35	40	57	42	63
ENSONIG00000009483	GL831134.1;GL831134.1;GL831134.1;GL831134.1	3132983;3138849;3144151;3144513	3134073;3139090;3144416;3147581	+;+;+;+	4668	133	240	132	126	206	221	156	209	124	156	194	118	240	220	195	147	145	181	121	127	132	166	101	155	286	136	94	115	62	75
ENSONIG00000009484	GL831134.1;GL831134.1;GL831134.1;GL831134.1	3170893;3171126;3171353;3171586	3171037;3171236;3171477;3171744	+;+;+;+	540	763	916	525	778	795	1143	621	939	805	682	994	632	903	905	1325	734	945	640	573	682	701	739	875	770	1083	626	444	626	344	573
ENSONIG00000009485	GL831134.1;GL831134.1;GL831134.1;GL831134.1;GL831134.1;GL831134.1;GL831134.1;GL831134.1;GL831134.1;GL831134.1;GL831134.1;GL831134.1;GL831134.1;GL831134.1;GL831134.1;GL831134.1;GL831134.1	3174693;3174693;3177389;3177389;3177553;3177745;3177745;3177930;3177930;3178824;3178824;3179002;3179002;3179134;3179134;3180476;3180476	3174948;3174948;3177502;3177502;3177567;3177824;3177824;3178002;3178002;3178906;3178906;3179047;3179047;3179284;3179284;3180572;3180588	-;-;-;-;-;-;-;-;-;-;-;-;-;-;-;-;-	931	151	343	128	243	308	339	177	277	199	227	344	153	301	262	395	230	250	224	140	155	230	234	259	264	463	231	183	202	92	177
ENSONIG00000009487	GL831134.1;GL831134.1;GL831134.1;GL831134.1;GL831134.1;GL831134.1	3184428;3184721;3184900;3185318;3185492;3186299	3184539;3184762;3185135;3185402;3185577;3186331	+;+;+;+;+;+	594	556	669	346	463	556	760	399	657	468	533	619	391	480	620	767	439	612	445	348	389	390	462	495	405	1053	407	380	368	214	455
ENSONIG00000009493	GL831134.1;GL831134.1;GL831134.1;GL831134.1;GL831134.1;GL831134.1;GL831134.1;GL831134.1;GL831134.1;GL831134.1;GL831134.1;GL831134.1;GL831134.1;GL831134.1;GL831134.1;GL831134.1;GL831134.1;GL831134.1;GL831134.1;GL831134.1;GL831134.1;GL831134.1;GL831134.1;GL831134.1;GL831134.1;GL831134.1;GL831134.1;GL831134.1;GL831134.1;GL831134.1;GL831134.1;GL831134.1;GL831134.1;GL831134.1;GL831134.1;GL831134.1;GL8…	3189859;3192965;3193140;3193775;3194026;3194258;3194514;3194722;3194996;3195238;3195538;3195742;3195997;3196243;3196407;3196940;3198598;3198740;3198816;3198982;3199147;3199477;3199678;3199802;3200092;3200319;3200928;3201365;3201816;3202346;3202799;3203119;3204630;3205010;3205372;3205419;3206067;3206168;3208325;3208746;3209189;3210020;3210699;3211671;3212346;3212864;3213264;3213630;3213906;3214085…	3190966;3193007;3193233;3193904;3194128;3194425;3194627;3194899;3195154;3195402;3195654;3195901;3196167;3196319;3196607;3197079;3198675;3198790;3198837;3199083;3199370;3199590;3199713;3199999;3200216;3200400;3201227;3201773;3202291;3202716;3202982;3203409;3204902;3205311;3205397;3205808;3206151;3206339;3208597;3209012;3209446;3210304;3210965;3211940;3212612;3213130;3213521;3213756;3214054;3214225…	-;-;-;-;-;-;-;-;-;-;-;-;-;-;-;-;-;-;-;-;-;-;-;-;-;-;-;-;-;-;-;-;-;-;-;-;-;-;-;-;-;-;-;-;-;-;-;-;-;-;-;-;-;-;-;-;-;-;-;-;-;-;-;-;-;-;-;-;-;-;-;-;-;-;-;-;-;-;-;-;-;-;-;-;-;-;-;-;-;-;-;-;-;-;-;-;-;-;-;-;-;-;-;-;-;-;-;-;-;-	21648	8	38	28	24	51	40	11	15	17	21	1	5	5	7	17	9	18	10	44	10	28	29	4	11	7	13	10	21	0	3
ENSONIG00000009497	GL831134.1;GL831134.1;GL831134.1;GL831134.1;GL831134.1;GL831134.1;GL831134.1;GL831134.1;GL831134.1;GL831134.1;GL831134.1;GL831134.1;GL831134.1	3254447;3254823;3255203;3255420;3255954;3256315;3256706;3257158;3258057;3259895;3260635;3260952;3261168	3254598;3254907;3255296;3255658;3256199;3256494;3256859;3257906;3258198;3260065;3260699;3260995;3261276	-;-;-;-;-;-;-;-;-;-;-;-;-	2430	309	448	225	362	333	387	330	286	289	341	270	245	229	424	376	352	288	151	207	220	216	265	341	368	212	213	242	156	147	206
ENSONIG00000009500	GL831134.1;GL831134.1;GL831134.1;GL831134.1;GL831134.1;GL831134.1;GL831134.1;GL831134.1;GL831134.1;GL831134.1;GL831134.1;GL831134.1;GL831134.1;GL831134.1;GL831134.1;GL831134.1	3262248;3263381;3263833;3264282;3264870;3265080;3265520;3267356;3267553;3267760;3267912;3268165;3268339;3268574;3268804;3269267	3262354;3263711;3263988;3264376;3264975;3265241;3265605;3267453;3267658;3267793;3268048;3268259;3268472;3268721;3269054;3270618	+;+;+;+;+;+;+;+;+;+;+;+;+;+;+;+	3398	376	457	236	329	446	661	231	375	413	386	557	179	314	524	401	407	366	357	332	373	263	446	434	295	688	464	358	294	263	355
ENSONIG00000009501	GL831134.1;GL831134.1;GL831134.1;GL831134.1;GL831134.1;GL831134.1;GL831134.1;GL831134.1;GL831134.1;GL831134.1;GL831134.1;GL831134.1	3271872;3272249;3272453;3272611;3272751;3272927;3273483;3275015;3275819;3276043;3276202;3277320	3271908;3272337;3272520;3272671;3272807;3273022;3273557;3275111;3275888;3276103;3276282;3277406	+;+;+;+;+;+;+;+;+;+;+;+	879	980	1526	800	1209	1411	1689	874	1574	1251	1034	1119	701	1201	1074	1803	1017	1367	1040	872	925	1048	1076	1144	1012	1682	1128	982	881	549	1032
ENSONIG00000009504	GL831134.1;GL831134.1;GL831134.1;GL831134.1;GL831134.1;GL831134.1;GL831134.1;GL831134.1;GL831134.1;GL831134.1	3280893;3291077;3292408;3292839;3293154;3293736;3293902;3298231;3298942;3301553	3284443;3291148;3292487;3292930;3293307;3293792;3294052;3298358;3299092;3302182	-;-;-;-;-;-;-;-;-;-	5066	2024	2672	1689	2128	1840	2976	1583	2571	2360	2325	1944	1156	2073	2190	2242	1535	2581	1663	1741	2120	1393	1705	2456	1771	2841	1979	1575	1538	1161	1800
ENSONIG00000009515	GL831134.1;GL831134.1	3399106;3399328	3399228;3399564	+;+	360	0	0	0	0	0	0	0	0	0	0	0	0	2	5	0	0	0	0	0	0	0	0	2	1	0	0	0	0	0	0
ENSONIG00000009516	GL831134.1;GL831134.1;GL831134.1;GL831134.1;GL831134.1	3404685;3406619;3407316;3408342;3408826	3405000;3406886;3407820;3408455;3409011	+;+;+;+;+	1389	2	5	0	3	0	0	0	0	4	1	8	2	8	5	6	0	0	0	10	0	4	2	4	5	0	12	0	0	0	6
ENSONIG00000009520	GL831134.1;GL831134.1	3411074;3412685	3412012;3413819	+;+	2074	19	95	12	47	56	110	29	54	51	31	84	68	49	83	88	63	78	66	60	38	35	66	58	52	115	40	109	63	7	56
ENSONIG00000009522	GL831134.1;GL831134.1;GL831134.1;GL831134.1;GL831134.1;GL831134.1;GL831134.1;GL831134.1;GL831134.1;GL831134.1;GL831134.1;GL831134.1;GL831134.1;GL831134.1;GL831134.1;GL831134.1;GL831134.1	3418112;3422385;3432321;3433266;3433848;3445720;3451818;3457870;3459799;3464182;3469170;3469599;3473070;3473621;3477661;3480728;3483266	3421180;3422640;3432543;3433356;3434002;3445875;3451967;3458041;3459903;3464265;3469325;3469726;3473204;3473762;3477746;3480815;3483325	-;-;-;-;-;-;-;-;-;-;-;-;-;-;-;-;-	5256	4326	7441	3055	4741	5010	7759	3868	4755	4779	5388	3942	3005	4450	5478	5857	4403	5453	4176	3511	3934	4089	5005	5263	4802	6286	4008	4762	3780	2332	3934
ENSONIG00000009527	GL831134.1;GL831134.1;GL831134.1;GL831134.1;GL831134.1;GL831134.1;GL831134.1;GL831134.1;GL831134.1;GL831134.1;GL831134.1;GL831134.1;GL831134.1;GL831134.1;GL831134.1;GL831134.1;GL831134.1;GL831134.1;GL831134.1;GL831134.1;GL831134.1;GL831134.1;GL831134.1;GL831134.1;GL831134.1;GL831134.1;GL831134.1;GL831134.1;GL831134.1;GL831134.1;GL831134.1;GL831134.1;GL831134.1;GL831134.1;GL831134.1;GL831134.1;GL8…	3547389;3548899;3548961;3548961;3549121;3549121;3549121;3549343;3549343;3549343;3549397;3549689;3549689;3549689;3549689;3550344;3550344;3550344;3550344;3550679;3550858;3550858;3550858;3550858;3551111;3551111;3551111;3551111;3551444;3551444;3551444;3551444;3552733;3552733;3552733;3552733;3552911;3552911;3552911;3553090;3553090;3553090;3554246;3554246;3554246;3554612;3554612;3554612;3556708;3556708…	3547749;3549031;3549031;3549031;3549247;3549247;3549247;3549513;3549513;3549513;3549513;3549891;3549891;3549891;3549891;3550570;3550758;3550758;3550758;3550758;3551028;3551028;3551028;3551028;3551295;3551295;3551295;3551295;3551630;3551630;3551630;3551630;3552814;3552814;3552814;3553261;3552975;3552975;3552975;3553193;3553193;3553193;3554372;3554372;3554372;3556528;3556528;3556528;3556730;3556730…	+;+;+;+;+;+;+;+;+;+;+;+;+;+;+;+;+;+;+;+;+;+;+;+;+;+;+;+;+;+;+;+;+;+;+;+;+;+;+;+;+;+;+;+;+;+;+;+;+;+;+;+;+;+;+;+;+;+;+;+;+;+;+;+;+;+;+;+;+;+;+;+;+;+;+;+;+;+;+;+;+;+;+;+;+;+;+;+;+	5523	3583	5368	2610	4029	4036	5568	2995	4255	3950	3949	3596	2475	3621	4250	4510	3050	4024	3166	2852	3373	2961	3371	4146	3405	3258	3215	2563	2937	1835	3203
ENSONIG00000009529	GL831134.1;GL831134.1;GL831134.1;GL831134.1;GL831134.1;GL831134.1;GL831134.1;GL831134.1;GL831134.1;GL831134.1;GL831134.1;GL831134.1;GL831134.1;GL831134.1;GL831134.1;GL831134.1;GL831134.1;GL831134.1;GL831134.1;GL831134.1;GL831134.1;GL831134.1;GL831134.1;GL831134.1;GL831134.1;GL831134.1;GL831134.1;GL831134.1;GL831134.1;GL831134.1;GL831134.1;GL831134.1;GL831134.1;GL831134.1;GL831134.1;GL831134.1;GL8…	3572763;3590856;3593944;3593944;3594013;3594857;3594857;3595064;3595064;3595310;3597594;3599060;3599066;3599470;3600456;3600456;3601497;3601497;3601683;3601683;3602308;3602308;3602804;3602804;3604871;3604871;3606140;3606146;3606840;3606840;3607215;3607215;3607551;3607551;3607949;3607949;3609468;3609468;3609837;3609843;3610079;3610079;3610281;3610281;3610567;3610567	3572937;3590971;3593995;3593995;3594018;3594887;3594887;3595251;3595251;3595412;3597622;3599409;3599776;3599776;3600590;3600590;3601587;3601587;3601775;3601775;3602516;3602516;3603003;3603003;3605116;3605116;3606258;3606258;3606902;3606902;3607283;3607283;3607613;3607613;3608029;3608029;3609689;3609689;3609931;3609931;3610182;3610182;3610427;3610427;3610707;3614089	+;+;+;+;+;+;+;+;+;+;+;+;+;+;+;+;+;+;+;+;+;+;+;+;+;+;+;+;+;+;+;+;+;+;+;+;+;+;+;+;+;+;+;+;+;+	6877	2598	3854	1843	2653	2894	4147	1905	3200	2591	2766	2815	1788	2973	3045	2918	2408	3228	2674	2551	2481	2409	2733	2525	2522	3388	2574	2348	2258	1285	2278
ENSONIG00000009533	GL831134.1;GL831134.1;GL831134.1;GL831134.1;GL831134.1;GL831134.1	3622129;3632335;3633164;3634381;3637237;3637702	3622394;3632791;3633266;3634552;3637360;3640026	+;+;+;+;+;+	3447	2868	4208	2167	3529	3578	4828	2624	4245	3544	2725	3767	2635	4301	4002	4799	2845	4171	3065	2341	2671	2841	3345	3407	3578	4551	3237	2709	2844	1475	2486
ENSONIG00000009535	GL831134.1;GL831134.1;GL831134.1;GL831134.1;GL831134.1;GL831134.1;GL831134.1;GL831134.1;GL831134.1;GL831134.1;GL831134.1;GL831134.1;GL831134.1;GL831134.1;GL831134.1;GL831134.1;GL831134.1;GL831134.1;GL831134.1	3642343;3644783;3648358;3648636;3649229;3650944;3654511;3660531;3662670;3663111;3663771;3664218;3664598;3664733;3664978;3667051;3669772;3670471;3681470	3644652;3644893;3648450;3648788;3649300;3651060;3654549;3660660;3662800;3663193;3663873;3664259;3664641;3664790;3665034;3667185;3669821;3670790;3682002	-;-;-;-;-;-;-;-;-;-;-;-;-;-;-;-;-;-;-	4581	781	1184	518	1012	959	1428	687	1062	1173	885	867	587	1096	1069	1085	721	1162	731	646	781	788	962	1034	989	1430	833	1082	831	501	731
ENSONIG00000009542	GL831134.1;GL831134.1;GL831134.1	3685460;3686097;3686916	3685847;3686618;3688177	+;+;+	2172	29	59	13	73	37	102	48	65	43	73	58	11	31	16	48	60	77	89	63	72	50	62	80	32	83	31	64	35	34	74
ENSONIG00000024258	GL831134.1;GL831134.1	3757653;3758187	3757983;3759295	+;+	1440	0	9	7	7	4	0	2	1	6	4	5	4	5	0	0	5	18	0	11	9	11	8	12	2	0	2	1	1	1	4
ENSONIG00000009544	GL831134.1;GL831134.1;GL831134.1;GL831134.1	3764043;3765379;3765594;3770096	3765187;3765504;3765742;3770502	-;-;-;-	1827	3849	5086	2864	4594	4379	5734	2959	4987	4120	3890	5332	3218	4621	4660	6694	4276	4484	3813	2784	3302	3874	4249	4891	3786	6679	3702	3178	3217	1864	3468
ENSONIG00000009547	GL831134.1;GL831134.1;GL831134.1;GL831134.1;GL831134.1;GL831134.1;GL831134.1;GL831134.1;GL831134.1;GL831134.1;GL831134.1;GL831134.1;GL831134.1;GL831134.1;GL831134.1;GL831134.1;GL831134.1	3773245;3774872;3775261;3775591;3775941;3776164;3776738;3777259;3777498;3777820;3778495;3778770;3778958;3779143;3779392;3779646;3780371	3774586;3775005;3775489;3775798;3776068;3776529;3776997;3777379;3777718;3777958;3778590;3778865;3779059;3779306;3779550;3779714;3780526	-;-;-;-;-;-;-;-;-;-;-;-;-;-;-;-;-	3990	220	329	148	218	252	510	204	406	242	287	311	173	276	295	356	377	375	242	272	253	275	285	247	283	384	256	279	260	143	238
ENSONIG00000009551	GL831134.1;GL831134.1;GL831134.1;GL831134.1;GL831134.1;GL831134.1;GL831134.1;GL831134.1;GL831134.1;GL831134.1;GL831134.1;GL831134.1;GL831134.1;GL831134.1;GL831134.1;GL831134.1;GL831134.1;GL831134.1;GL831134.1;GL831134.1;GL831134.1;GL831134.1;GL831134.1;GL831134.1;GL831134.1;GL831134.1;GL831134.1;GL831134.1;GL831134.1;GL831134.1;GL831134.1;GL831134.1;GL831134.1;GL831134.1;GL831134.1;GL831134.1;GL8…	3785916;3788046;3788055;3788657;3788662;3788662;3791226;3791226;3791226;3791423;3791423;3791423;3792629;3792629;3792629;3792745;3792745;3795476;3795476;3795488;3796223;3796229;3796229;3796381;3796381;3796381;3797764;3797764;3797764;3801051;3801051;3801051;3801355;3803292;3804360;3804629;3805231;3810161;3810516;3810925;3811321;3813214;3813363;3819341;3819341;3819341;3822536;3822536;3822536;3823073…	3788165;3788158;3788158;3788713;3788719;3788719;3791340;3791340;3791340;3791516;3791516;3791516;3792725;3792725;3792814;3792779;3792779;3795689;3795686;3795686;3796288;3796288;3796288;3796521;3796521;3796521;3797851;3797851;3797851;3801209;3801209;3801209;3801382;3803460;3804381;3804642;3805266;3810183;3810595;3810949;3811550;3813418;3813418;3819560;3819560;3819560;3822645;3822645;3822645;3823082…	-;-;-;-;-;-;-;-;-;-;-;-;-;-;-;-;-;-;-;-;-;-;-;-;-;-;-;-;-;-;-;-;-;-;-;-;-;-;-;-;-;-;-;-;-;-;-;-;-;-;-;-;-;-;-;-;-;-	5860	252	445	185	422	393	545	281	441	388	469	375	248	324	338	557	412	592	413	286	336	387	403	351	460	416	376	437	341	197	306
ENSONIG00000021429	GL831134.1	3786341	3787222	+	882	0	0	0	0	0	0	0	0	0	0	0	0	0	0	0	0	0	0	0	0	0	0	0	0	0	0	0	0	0	0
ENSONIG00000009557	GL831134.1;GL831134.1;GL831134.1;GL831134.1;GL831134.1;GL831134.1;GL831134.1	3837101;3837345;3840241;3840625;3840960;3842424;3845452	3837199;3837503;3840386;3840841;3841105;3842551;3845573	-;-;-;-;-;-;-	1017	2306	3410	1511	2606	2548	4239	2058	3124	2635	2297	2938	1801	2633	2801	3455	2449	3056	2570	1946	2189	2178	2424	2592	2455	3601	2543	2268	1979	1296	2165
ENSONIG00000009560	GL831134.1;GL831134.1;GL831134.1;GL831134.1;GL831134.1;GL831134.1;GL831134.1;GL831134.1;GL831134.1;GL831134.1;GL831134.1;GL831134.1;GL831134.1;GL831134.1;GL831134.1;GL831134.1;GL831134.1;GL831134.1;GL831134.1;GL831134.1;GL831134.1;GL831134.1;GL831134.1;GL831134.1;GL831134.1;GL831134.1;GL831134.1;GL831134.1;GL831134.1;GL831134.1;GL831134.1;GL831134.1;GL831134.1;GL831134.1;GL831134.1;GL831134.1;GL8…	3862344;3862489;3864825;3864875;3865018;3865018;3865222;3865222;3866286;3867353;3867353;3867646;3867646;3869507;3869507;3871308;3871308;3872287;3872287;3874572;3874871;3874871;3876807;3876807;3877160;3877160;3878063;3878063;3878274;3878274;3878906;3878906;3879297;3879297;3879597;3879597;3881584;3881584;3885686	3862361;3862606;3864921;3864927;3865107;3865107;3865381;3865381;3866309;3867449;3867449;3867759;3867759;3869601;3869601;3871389;3871389;3872382;3872382;3874640;3874954;3874954;3876931;3876931;3877326;3877326;3878168;3878168;3878428;3878428;3878991;3878991;3879510;3879510;3879677;3879677;3881668;3881651;3886114	-;-;-;-;-;-;-;-;-;-;-;-;-;-;-;-;-;-;-;-;-;-;-;-;-;-;-;-;-;-;-;-;-;-;-;-;-;-;-	2598	794	1475	672	1092	1304	1621	748	1130	1030	912	1013	664	1049	1154	1313	1019	1087	852	770	865	816	929	1113	984	1127	1057	1017	829	490	779
ENSONIG00000009565	GL831134.1;GL831134.1;GL831134.1;GL831134.1;GL831134.1;GL831134.1;GL831134.1;GL831134.1;GL831134.1;GL831134.1;GL831134.1;GL831134.1;GL831134.1;GL831134.1;GL831134.1;GL831134.1;GL831134.1;GL831134.1;GL831134.1;GL831134.1	3887105;3887767;3891064;3891310;3891454;3891660;3891982;3893110;3893855;3894105;3894705;3894949;3895222;3895420;3895633;3895908;3896232;3898791;3903292;3905749	3887445;3887891;3891200;3891368;3891533;3891863;3892202;3893252;3894008;3894200;3894841;3895132;3895284;3895548;3895746;3896053;3896391;3898940;3903426;3905838	+;+;+;+;+;+;+;+;+;+;+;+;+;+;+;+;+;+;+;+	2868	20	12	14	13	17	46	18	11	30	38	24	15	27	22	61	16	50	18	15	30	11	32	86	10	0	72	25	22	9	48
ENSONIG00000009568	GL831134.1;GL831134.1;GL831134.1;GL831134.1;GL831134.1;GL831134.1;GL831134.1;GL831134.1	3915084;3917891;3922768;3923609;3924385;3925442;3928525;3929012	3915961;3918012;3922857;3923687;3924575;3925600;3928682;3929152	+;+;+;+;+;+;+;+	1818	183	270	130	133	244	269	161	208	190	199	191	103	181	195	141	200	232	161	99	170	122	143	175	151	216	183	167	148	87	116
ENSONIG00000009573	GL831134.1;GL831134.1;GL831134.1;GL831134.1;GL831134.1;GL831134.1;GL831134.1;GL831134.1;GL831134.1;GL831134.1;GL831134.1;GL831134.1;GL831134.1;GL831134.1;GL831134.1;GL831134.1;GL831134.1;GL831134.1;GL831134.1;GL831134.1;GL831134.1;GL831134.1;GL831134.1;GL831134.1;GL831134.1;GL831134.1;GL831134.1;GL831134.1;GL831134.1;GL831134.1;GL831134.1;GL831134.1;GL831134.1;GL831134.1;GL831134.1;GL831134.1;GL8…	3970189;3971168;3974782;3975150;3975335;3976437;3977662;3977935;3978294;3978792;3979065;3979462;3979911;3980778;3980935;3985351;3986624;3987153;3988084;3990929;3991120;3991657;3992350;3992542;3993854;3994120;3994407;3996665;3996864;3997188;3997426;3999037;3999263;3999533;3999923;4000389;4000635;4000828;4002597;4002789;4003140;4004229;4004541;4005033;4005287;4006453	3970318;3971326;3974972;3975253;3975450;3976490;3977742;3978144;3978406;3978904;3979196;3979531;3980028;3980845;3980998;3986023;3986940;3987285;3988213;3990988;3991226;3991668;3992446;3992702;3993991;3994321;3994571;3996775;3996944;3997307;3997491;3999128;3999437;3999660;4000019;4000494;4000742;4000928;4002700;4002885;4003176;4004273;4004596;4005165;4005492;4006977	+;+;+;+;+;+;+;+;+;+;+;+;+;+;+;+;+;+;+;+;+;+;+;+;+;+;+;+;+;+;+;+;+;+;+;+;+;+;+;+;+;+;+;+;+;+	6306	5460	10096	3889	5906	6387	10131	5160	7723	6428	8089	5384	3703	6061	6515	5634	5876	7404	5953	4926	5692	5241	7474	6870	7034	3709	5495	5543	5003	2768	5105
ENSONIG00000009579	GL831134.1;GL831134.1;GL831134.1	4011607;4012623;4016526	4012239;4012792;4019677	+;+;+	3955	1363	1631	884	1401	1376	1753	881	1692	1088	1084	1077	905	1409	1751	1774	1172	1371	976	964	842	1312	1297	1545	1038	1689	1131	1117	1122	583	966
ENSONIG00000009582	GL831134.1;GL831134.1;GL831134.1;GL831134.1;GL831134.1;GL831134.1;GL831134.1;GL831134.1;GL831134.1;GL831134.1;GL831134.1;GL831134.1;GL831134.1;GL831134.1	4019740;4020618;4020815;4021232;4021440;4021645;4021892;4022363;4022838;4023070;4023357;4023795;4024097;4024568	4020509;4020729;4020909;4021346;4021569;4021784;4022024;4022444;4022985;4023211;4023464;4023945;4024179;4024951	-;-;-;-;-;-;-;-;-;-;-;-;-;-	2593	10	82	33	42	0	28	17	52	9	8	2	12	85	145	47	43	0	5	41	1	2	58	71	115	31	121	33	6	8	7
ENSONIG00000009591	GL831134.1;GL831134.1;GL831134.1;GL831134.1;GL831134.1;GL831134.1;GL831134.1;GL831134.1;GL831134.1;GL831134.1;GL831134.1;GL831134.1;GL831134.1;GL831134.1;GL831134.1;GL831134.1;GL831134.1;GL831134.1;GL831134.1;GL831134.1;GL831134.1;GL831134.1;GL831134.1;GL831134.1;GL831134.1	4028826;4029541;4031025;4031025;4033988;4033988;4034847;4034847;4035010;4035010;4035204;4035204;4035595;4035595;4035789;4035789;4036007;4036013;4036363;4036438;4036438;4036660;4036660;4036915;4036915	4029665;4029665;4031158;4031158;4034103;4034103;4034924;4034924;4035047;4035047;4035337;4035337;4035679;4035679;4035908;4035908;4036102;4036102;4036368;4036521;4036521;4036822;4036822;4037106;4037106	+;+;+;+;+;+;+;+;+;+;+;+;+;+;+;+;+;+;+;+;+;+;+;+;+	2086	681	1166	526	883	923	1267	607	943	911	808	939	456	761	1001	1315	735	988	755	668	567	763	767	821	826	1410	815	845	788	378	664
ENSONIG00000009594	GL831134.1;GL831134.1;GL831134.1;GL831134.1;GL831134.1;GL831134.1;GL831134.1;GL831134.1;GL831134.1;GL831134.1;GL831134.1;GL831134.1;GL831134.1	4039868;4040105;4043203;4043445;4043610;4044709;4044943;4045242;4045523;4045779;4048509;4050167;4050301	4039998;4040205;4043301;4043524;4043771;4044840;4045087;4045308;4045568;4045864;4048613;4050208;4050661	-;-;-;-;-;-;-;-;-;-;-;-;-	1557	940	1459	610	1210	1106	1663	852	1156	1142	1064	1266	739	1097	1483	1669	964	1167	1031	846	840	874	1019	1241	1096	1277	940	989	831	550	821
ENSONIG00000021430	GL831134.1	4051250	4052317	+	1068	133	337	121	169	190	302	146	204	165	158	226	189	224	211	265	170	181	155	126	161	159	254	182	186	271	245	191	126	96	169
ENSONIG00000009597	GL831134.1;GL831134.1;GL831134.1;GL831134.1;GL831134.1;GL831134.1;GL831134.1;GL831134.1;GL831134.1;GL831134.1;GL831134.1;GL831134.1;GL831134.1	4053929;4055290;4055520;4055753;4056112;4056405;4056616;4057680;4058122;4058334;4059167;4059468;4060130	4054107;4055421;4055628;4055805;4056212;4056482;4056669;4057744;4058229;4058432;4059312;4059616;4060305	-;-;-;-;-;-;-;-;-;-;-;-;-	1449	1149	2275	971	1569	1603	2108	1172	1440	1263	1414	1515	1245	1506	1648	1932	1415	1520	1107	899	1097	1324	1347	1636	1284	1264	1248	1262	1034	761	1302
ENSONIG00000009599	GL831134.1;GL831134.1;GL831134.1;GL831134.1;GL831134.1;GL831134.1;GL831134.1;GL831134.1;GL831134.1;GL831134.1;GL831134.1;GL831134.1;GL831134.1;GL831134.1;GL831134.1;GL831134.1;GL831134.1;GL831134.1;GL831134.1;GL831134.1;GL831134.1;GL831134.1;GL831134.1;GL831134.1;GL831134.1;GL831134.1;GL831134.1;GL831134.1;GL831134.1;GL831134.1;GL831134.1;GL831134.1;GL831134.1;GL831134.1;GL831134.1;GL831134.1;GL8…	4114095;4135239;4151204;4151205;4156485;4156485;4158849;4160100;4160100;4168536;4168536;4171991;4171991;4173922;4173922;4177055;4177055;4181348;4181348;4183116;4183116;4184901;4184901;4185375;4185375;4186717;4186720;4189380;4189380;4190362;4190362;4192553;4192553;4192876;4193032;4193920;4193920;4196034;4196034;4197232;4198390;4198390;4203072	4114881;4135453;4151418;4151418;4156594;4156594;4158863;4160900;4160900;4168835;4168835;4172091;4172091;4174107;4174107;4177093;4177093;4181531;4181531;4183238;4183238;4185106;4185106;4185548;4185548;4186929;4186929;4189600;4189600;4190428;4190428;4192644;4192644;4192882;4193069;4194088;4194088;4196162;4196162;4197328;4198515;4198395;4203946	+;+;+;+;+;+;+;+;+;+;+;+;+;+;+;+;+;+;+;+;+;+;+;+;+;+;+;+;+;+;+;+;+;+;+;+;+;+;+;+;+;+;+	5490	992	1954	845	1260	1425	2185	1171	1390	1164	1546	1453	741	1347	1616	1462	1308	1675	1268	1113	984	1004	1440	1451	1478	1062	1075	1210	965	646	1069
ENSONIG00000024554	GL831134.1;GL831134.1	4211501;4212968	4211858;4213013	-;-	404	1	1	0	0	1	0	0	0	0	0	0	0	4	1	0	0	4	0	0	0	0	0	0	0	1	0	0	0	2	0
ENSONIG00000009613	GL831134.1;GL831134.1;GL831134.1;GL831134.1;GL831134.1;GL831134.1;GL831134.1;GL831134.1;GL831134.1;GL831134.1	4243147;4247223;4247363;4247775;4247971;4248168;4248384;4250100;4250361;4253656	4243192;4247284;4247491;4247873;4248053;4248294;4248479;4250222;4250525;4253781	+;+;+;+;+;+;+;+;+;+	1056	552	795	489	591	656	962	521	623	620	660	591	343	648	789	904	575	749	530	411	558	551	519	723	505	832	579	507	485	318	545
ENSONIG00000009617	GL831134.1;GL831134.1;GL831134.1	4255862;4256837;4257143	4256032;4257043;4257502	+;+;+	738	127	169	74	145	188	243	111	207	139	124	202	108	142	206	237	147	176	136	106	115	168	139	170	147	305	149	124	107	73	99
ENSONIG00000009620	GL831134.1;GL831134.1;GL831134.1;GL831134.1;GL831134.1;GL831134.1;GL831134.1;GL831134.1;GL831134.1;GL831134.1;GL831134.1;GL831134.1;GL831134.1;GL831134.1;GL831134.1;GL831134.1;GL831134.1;GL831134.1;GL831134.1;GL831134.1;GL831134.1;GL831134.1;GL831134.1;GL831134.1;GL831134.1;GL831134.1	4258203;4258743;4258790;4258956;4258956;4259275;4259275;4259502;4259502;4259741;4259741;4259931;4259931;4260236;4260236;4260539;4260539;4260805;4260805;4260979;4260979;4261309;4261799;4261802;4262061;4262061	4258393;4258863;4258863;4259135;4259135;4259386;4259386;4259649;4259649;4259842;4259842;4260127;4260127;4260432;4260432;4260692;4260692;4260876;4260876;4261164;4261175;4261316;4261972;4261972;4262304;4262304	+;+;+;+;+;+;+;+;+;+;+;+;+;+;+;+;+;+;+;+;+;+;+;+;+;+	2097	331	563	289	351	450	569	368	437	450	393	447	320	400	449	504	389	468	340	266	332	266	398	465	314	405	386	311	252	212	300
ENSONIG00000009626	GL831134.1;GL831134.1;GL831134.1;GL831134.1;GL831134.1;GL831134.1;GL831134.1;GL831134.1;GL831134.1;GL831134.1;GL831134.1;GL831134.1;GL831134.1;GL831134.1;GL831134.1;GL831134.1;GL831134.1;GL831134.1;GL831134.1;GL831134.1	4265262;4265265;4266374;4266933;4267005;4267021;4267121;4267143;4267382;4267382;4267382;4267576;4267576;4267576;4268191;4269335;4269629;4269976;4270351;4274080	4265351;4265348;4266449;4266994;4267076;4267290;4267290;4267290;4267472;4267472;4267472;4267718;4267715;4267756;4268211;4269348;4269694;4269997;4270525;4274280	-;-;-;-;-;-;-;-;-;-;-;-;-;-;-;-;-;-;-;-	1285	249	352	165	282	262	351	215	302	289	259	216	209	302	261	403	247	290	238	213	177	204	229	319	239	251	233	206	218	142	210
ENSONIG00000009630	GL831134.1;GL831134.1;GL831134.1;GL831134.1;GL831134.1;GL831134.1;GL831134.1;GL831134.1;GL831134.1	4275975;4277832;4278052;4278390;4278563;4279967;4280256;4280526;4280841	4276020;4277965;4278295;4278469;4278699;4280141;4280411;4280638;4280931	+;+;+;+;+;+;+;+;+	1176	48	80	38	87	71	89	67	62	56	80	79	56	69	66	77	38	83	45	54	31	38	59	90	56	73	61	60	43	22	70
ENSONIG00000009631	GL831134.1;GL831134.1;GL831134.1;GL831134.1;GL831134.1;GL831134.1;GL831134.1;GL831134.1;GL831134.1;GL831134.1;GL831134.1;GL831134.1;GL831134.1;GL831134.1;GL831134.1;GL831134.1;GL831134.1;GL831134.1;GL831134.1;GL831134.1;GL831134.1;GL831134.1;GL831134.1;GL831134.1;GL831134.1;GL831134.1	4281406;4281948;4282165;4282515;4282785;4283164;4283437;4283622;4283914;4284190;4284395;4284491;4284560;4285537;4285537;4286092;4286092;4286321;4286321;4286559;4286559;4286898;4286898;4287109;4287109;4287450	4281644;4282087;4282268;4282672;4282944;4283360;4283518;4283828;4284089;4284294;4284464;4284943;4284943;4286004;4286004;4286244;4286244;4286470;4286470;4286810;4286861;4287008;4287008;4287245;4287249;4287772	-;-;-;-;-;-;-;-;-;-;-;-;-;-;-;-;-;-;-;-;-;-;-;-;-;-	3740	111	173	69	84	73	176	59	69	119	86	106	87	120	93	70	88	186	82	87	108	60	43	85	104	159	89	75	76	48	63
ENSONIG00000009634	GL831134.1;GL831134.1;GL831134.1;GL831134.1;GL831134.1;GL831134.1;GL831134.1;GL831134.1	4289530;4289908;4291376;4292699;4293422;4294863;4296505;4296834	4289802;4289987;4291531;4292919;4293660;4295057;4296659;4297161	-;-;-;-;-;-;-;-	1647	45	139	57	107	92	97	58	92	71	65	70	23	58	90	109	55	115	74	57	81	111	66	76	70	75	67	67	54	33	72
ENSONIG00000009635	GL831134.1;GL831134.1;GL831134.1;GL831134.1;GL831134.1;GL831134.1;GL831134.1;GL831134.1;GL831134.1;GL831134.1;GL831134.1;GL831134.1;GL831134.1;GL831134.1	4306783;4310078;4310444;4310848;4311640;4312724;4313334;4313692;4313996;4314247;4314426;4314629;4314883;4315402	4307755;4310215;4310540;4311280;4311962;4312829;4313427;4313801;4314137;4314317;4314554;4314781;4314961;4315458	+;+;+;+;+;+;+;+;+;+;+;+;+;+	2905	16	14	4	14	8	4	15	12	2	6	12	8	3	5	9	5	14	7	21	13	6	8	14	5	22	2	10	8	5	9
ENSONIG00000023679	GL831134.1;GL831134.1;GL831134.1;GL831134.1;GL831134.1	4350901;4350901;4352176;4353602;4354416	4351044;4351044;4352344;4353786;4354862	+;+;+;+;+	945	79	87	69	118	75	132	69	110	85	64	138	82	135	128	168	87	100	71	52	84	97	55	122	71	112	118	70	48	33	68
ENSONIG00000021431	GL831134.1	4462583	4464001	-	1419	153	279	122	201	188	302	163	256	225	282	214	186	234	185	216	132	261	250	89	148	233	175	218	194	363	210	116	93	83	155
ENSONIG00000009636	GL831134.1;GL831134.1	4470044;4472271	4471097;4473528	-;-	2312	55	59	30	77	57	140	42	85	29	54	108	59	71	150	102	46	59	59	31	61	37	59	102	48	89	67	39	59	35	38
ENSONIG00000021432	GL831134.1	4475047	4475868	-	822	2	8	4	1	9	0	0	6	0	0	0	3	0	11	2	1	1	1	0	0	0	2	0	4	0	0	2	0	0	2
ENSONIG00000009637	GL831134.1;GL831134.1;GL831134.1;GL831134.1;GL831134.1;GL831134.1;GL831134.1;GL831134.1;GL831134.1	4506153;4509287;4510697;4511404;4512036;4512306;4513179;4513568;4514456	4508362;4509399;4511089;4511484;4512207;4512391;4513365;4513774;4515030	-;-;-;-;-;-;-;-;-	4024	147	131	118	138	45	61	105	251	94	90	151	55	127	94	164	73	138	70	35	82	103	114	113	103	165	80	70	99	87	125
ENSONIG00000009639	GL831134.1;GL831134.1;GL831134.1	4515195;4515783;4516905	4515634;4515954;4516948	-;-;-	656	272	418	194	294	372	461	301	428	320	295	514	232	376	369	525	405	321	230	176	266	287	346	360	292	348	303	222	211	170	303
ENSONIG00000009641	GL831134.1;GL831134.1;GL831134.1;GL831134.1;GL831134.1;GL831134.1;GL831134.1;GL831134.1;GL831134.1;GL831134.1;GL831134.1	4522774;4523141;4524278;4524579;4524798;4525142;4526060;4526300;4526530;4527258;4528946	4522861;4523303;4524434;4524716;4525029;4525291;4526136;4526375;4527126;4527407;4531813	+;+;+;+;+;+;+;+;+;+;+	4696	172	153	85	121	96	125	77	103	134	103	140	83	80	113	194	126	80	81	84	105	75	100	122	101	64	47	22	51	71	50
ENSONIG00000009642	GL831134.1;GL831134.1;GL831134.1;GL831134.1;GL831134.1;GL831134.1	4534046;4534217;4536949;4538625;4538854;4540535	4534198;4534474;4537283;4538752;4539016;4540622	-;-;-;-;-;-	1125	6	4	0	0	0	1	0	0	1	0	0	2	0	0	0	0	0	0	0	0	0	0	0	0	8	0	0	0	0	1
ENSONIG00000009643	GL831134.1;GL831134.1;GL831134.1;GL831134.1;GL831134.1;GL831134.1;GL831134.1;GL831134.1;GL831134.1;GL831134.1;GL831134.1;GL831134.1;GL831134.1;GL831134.1	4548937;4549218;4549348;4549517;4549677;4550363;4551311;4551735;4552175;4552677;4553014;4553608;4554069;4554976	4549092;4549236;4549398;4549560;4549755;4550480;4551489;4551953;4552327;4552892;4553481;4553787;4554210;4555192	+;+;+;+;+;+;+;+;+;+;+;+;+;+	2241	0	0	0	0	0	0	0	0	0	0	0	2	0	0	0	0	0	0	0	0	0	3	0	8	0	0	0	0	0	1
ENSONIG00000009647	GL831134.1;GL831134.1;GL831134.1;GL831134.1;GL831134.1;GL831134.1;GL831134.1;GL831134.1;GL831134.1;GL831134.1;GL831134.1;GL831134.1;GL831134.1;GL831134.1;GL831134.1;GL831134.1;GL831134.1;GL831134.1;GL831134.1;GL831134.1;GL831134.1;GL831134.1;GL831134.1;GL831134.1;GL831134.1;GL831134.1;GL831134.1;GL831134.1;GL831134.1;GL831134.1;GL831134.1;GL831134.1;GL831134.1;GL831134.1;GL831134.1;GL831134.1;GL8…	4554004;4556884;4557256;4557631;4558286;4558286;4558623;4558623;4559180;4559180;4559556;4559556;4559783;4559783;4560705;4560705;4561211;4561211;4562027;4562027;4562752;4562752;4563161;4563161;4564178;4564178;4565660;4565660;4568496;4568496;4569445;4569445;4570642;4570642;4601790;4601790;4602765	4558155;4557192;4557516;4558155;4558514;4558514;4558817;4558817;4559293;4559293;4559686;4559686;4559945;4559945;4560905;4560905;4561366;4561366;4562122;4562122;4562812;4562812;4563363;4563363;4564405;4564405;4565806;4565806;4568644;4568644;4569570;4569570;4570838;4570838;4602527;4603757;4603164	-;-;-;-;-;-;-;-;-;-;-;-;-;-;-;-;-;-;-;-;-;-;-;-;-;-;-;-;-;-;-;-;-;-;-;-;-	8516	897	1497	730	1041	870	1455	875	1096	1130	1205	1024	813	1244	1282	1478	827	1341	972	813	1049	951	1007	1340	1164	711	782	697	807	474	820
ENSONIG00000024250	GL831134.1;GL831134.1	4603929;4604888	4604771;4605162	+;+	1118	7	5	2	3	11	16	12	17	1	1	0	5	5	4	1	21	13	0	0	3	0	1	0	1	0	9	0	3	4	1
ENSONIG00000009650	GL831134.1;GL831134.1;GL831134.1;GL831134.1;GL831134.1;GL831134.1;GL831134.1;GL831134.1;GL831134.1;GL831134.1;GL831134.1;GL831134.1;GL831134.1;GL831134.1;GL831134.1;GL831134.1;GL831134.1;GL831134.1;GL831134.1;GL831134.1;GL831134.1;GL831134.1;GL831134.1;GL831134.1;GL831134.1;GL831134.1;GL831134.1;GL831134.1;GL831134.1	4605381;4608190;4608333;4608333;4609580;4609580;4611302;4611302;4612432;4612432;4618028;4618028;4618442;4619334;4619405;4624191;4624191;4625082;4625082;4625555;4626059;4626527;4626888;4626888;4634162;4634162;4634873;4637025;4637065	4608205;4608205;4608409;4608409;4609720;4609720;4611363;4611363;4612487;4612487;4618184;4618184;4618512;4619533;4619533;4624539;4624539;4625285;4625285;4625612;4626093;4626595;4626974;4626968;4634343;4634326;4634888;4637103;4637728	-;-;-;-;-;-;-;-;-;-;-;-;-;-;-;-;-;-;-;-;-;-;-;-;-;-;-;-;-	5293	5628	8527	4023	6314	6488	8949	4655	6884	5803	5540	5812	4075	5883	7301	6779	5398	6791	5299	4745	5129	4750	5549	6610	6063	5640	5805	5308	5022	2881	4934
ENSONIG00000009653	GL831134.1;GL831134.1;GL831134.1;GL831134.1;GL831134.1;GL831134.1;GL831134.1;GL831134.1;GL831134.1;GL831134.1;GL831134.1;GL831134.1;GL831134.1;GL831134.1;GL831134.1;GL831134.1;GL831134.1;GL831134.1	4656871;4658304;4658311;4658747;4658747;4659085;4659085;4659982;4659982;4660163;4660163;4662027;4662027;4662317;4662317;4662556;4662556;4663133	4657139;4658415;4658415;4658880;4658880;4659310;4659310;4660069;4660069;4660216;4660216;4662150;4662150;4662432;4662432;4662619;4663566;4663141	+;+;+;+;+;+;+;+;+;+;+;+;+;+;+;+;+;+	2134	614	814	492	668	696	852	568	1075	785	598	763	557	845	786	1004	706	763	623	568	573	715	844	761	769	1026	845	511	591	316	720
ENSONIG00000009657	GL831134.1;GL831134.1;GL831134.1;GL831134.1;GL831134.1;GL831134.1;GL831134.1;GL831134.1;GL831134.1;GL831134.1;GL831134.1;GL831134.1;GL831134.1;GL831134.1;GL831134.1;GL831134.1;GL831134.1;GL831134.1;GL831134.1;GL831134.1	4677457;4681119;4681535;4690565;4700675;4701816;4702476;4704304;4706065;4706367;4706613;4707212;4707791;4708793;4709563;4709810;4710047;4710260;4710539;4710788	4678065;4681268;4681653;4690676;4700802;4701974;4702617;4704459;4706262;4706464;4706697;4707301;4708053;4708919;4709679;4709956;4710145;4710374;4710663;4712929	+;+;+;+;+;+;+;+;+;+;+;+;+;+;+;+;+;+;+;+	5181	9587	14201	5796	8224	9489	13859	7057	10671	8033	9645	8972	5786	8391	9776	8720	8247	9356	8116	6974	7379	6542	8921	9287	7105	9160	8199	7627	7089	3888	7219
ENSONIG00000026046	GL831134.1;GL831134.1;GL831134.1;GL831134.1	4714552;4714669;4715124;4715312	4714572;4715028;4715210;4716805	+;+;+;+	1962	47	77	21	68	65	66	18	71	59	66	57	38	72	55	87	31	67	25	52	51	50	50	43	63	95	38	62	14	24	60
ENSONIG00000009667	GL831134.1;GL831134.1;GL831134.1;GL831134.1;GL831134.1	4717221;4717760;4718060;4718323;4719003	4717621;4717902;4718188;4718422;4719983	+;+;+;+;+	1754	8	0	0	2	0	0	4	0	12	0	0	4	0	5	10	11	0	6	2	1	8	8	13	4	21	0	2	6	0	4
ENSONIG00000009669	GL831134.1;GL831134.1;GL831134.1;GL831134.1	4720015;4722990;4723882;4724743	4721048;4723109;4724123;4725292	-;-;-;-	1946	44	39	33	24	35	87	20	53	28	30	30	13	30	33	27	21	53	51	44	23	29	53	34	88	101	41	22	38	9	41
ENSONIG00000009674	GL831134.1;GL831134.1;GL831134.1;GL831134.1;GL831134.1;GL831134.1;GL831134.1;GL831134.1;GL831134.1;GL831134.1;GL831134.1;GL831134.1;GL831134.1;GL831134.1;GL831134.1;GL831134.1;GL831134.1;GL831134.1;GL831134.1;GL831134.1;GL831134.1;GL831134.1;GL831134.1;GL831134.1;GL831134.1;GL831134.1;GL831134.1;GL831134.1;GL831134.1;GL831134.1;GL831134.1;GL831134.1;GL831134.1;GL831134.1;GL831134.1;GL831134.1;GL8…	4734057;4734320;4734693;4734838;4735229;4735438;4735726;4735981;4738052;4738052;4738257;4738257;4738440;4738473;4739053;4739090;4739394;4739713;4740607;4740621;4741166;4741166;4741295;4741379;4741379;4741669;4742254;4742369;4742723;4743129;4743848;4745020;4745205;4745274;4745579;4746623;4751046;4751046;4753579;4753579;4753895;4753895;4754105;4754105;4754377;4754377;4754939;4754939;4755881;4755881…	4734201;4734349;4734761;4735006;4735306;4735515;4736076;4736076;4738183;4738183;4738343;4738358;4738963;4738963;4739219;4739219;4739417;4739908;4740655;4740704;4741283;4741283;4741319;4741536;4741458;4741718;4742339;4742443;4742824;4743219;4744011;4745161;4745473;4746461;4746461;4746646;4751147;4751147;4753644;4753644;4754024;4754024;4754180;4754180;4754437;4754437;4755051;4755051;4755964;4755970…	-;-;-;-;-;-;-;-;-;-;-;-;-;-;-;-;-;-;-;-;-;-;-;-;-;-;-;-;-;-;-;-;-;-;-;-;-;-;-;-;-;-;-;-;-;-;-;-;-;-;-;-;-;-;-;-;-;-;-	6014	324	463	220	306	273	311	213	415	285	307	295	288	250	294	414	328	310	209	196	240	314	329	344	283	331	268	275	349	172	235
ENSONIG00000009681	GL831134.1;GL831134.1;GL831134.1;GL831134.1;GL831134.1;GL831134.1;GL831134.1;GL831134.1;GL831134.1;GL831134.1;GL831134.1;GL831134.1;GL831134.1;GL831134.1;GL831134.1;GL831134.1;GL831134.1;GL831134.1;GL831134.1;GL831134.1;GL831134.1;GL831134.1;GL831134.1;GL831134.1	4765813;4770547;4772534;4772936;4773153;4773393;4773682;4774637;4774933;4775288;4775947;4776259;4776562;4776807;4777146;4777363;4777547;4777750;4778052;4778490;4779992;4780387;4780687;4781845	4770151;4772361;4772632;4773043;4773236;4773555;4773875;4774775;4775114;4775526;4776133;4776385;4776716;4776959;4777271;4777458;4777651;4777917;4778111;4778615;4780133;4780505;4780771;4782229	-;-;-;-;-;-;-;-;-;-;-;-;-;-;-;-;-;-;-;-;-;-;-;-	9396	979	1572	838	1231	1090	1671	1125	1413	1390	1284	1068	725	1111	1402	1422	952	1136	1300	786	1045	990	950	1351	1166	1093	1211	960	851	582	808
ENSONIG00000009683	GL831134.1;GL831134.1;GL831134.1;GL831134.1;GL831134.1;GL831134.1;GL831134.1;GL831134.1;GL831134.1;GL831134.1;GL831134.1	4787139;4795416;4795620;4811260;4813087;4815063;4816522;4817884;4821688;4822539;4823860	4788422;4795519;4795774;4811428;4813214;4815165;4816757;4817916;4821811;4822818;4823922	+;+;+;+;+;+;+;+;+;+;+	2679	1466	2237	827	1600	1579	2044	1300	1375	1192	1611	1649	1126	1757	1899	1821	1286	1596	1131	804	966	1263	1665	1816	1568	1596	1024	1546	1075	779	1303
ENSONIG00000009687	GL831134.1;GL831134.1;GL831134.1;GL831134.1	4827971;4828424;4829644;4830990	4828027;4828532;4829754;4832074	+;+;+;+	1362	1168	2020	1351	1896	1647	2585	1315	1683	2088	1832	2277	1119	1966	2316	2239	1723	2688	1601	1392	1688	1615	1369	2237	1500	2824	1274	1254	1305	1206	1378
ENSONIG00000009689	GL831134.1;GL831134.1;GL831134.1;GL831134.1;GL831134.1;GL831134.1;GL831134.1;GL831134.1;GL831134.1;GL831134.1;GL831134.1;GL831134.1;GL831134.1;GL831134.1;GL831134.1;GL831134.1;GL831134.1;GL831134.1;GL831134.1;GL831134.1;GL831134.1;GL831134.1;GL831134.1;GL831134.1;GL831134.1;GL831134.1;GL831134.1;GL831134.1;GL831134.1	4834645;4837052;4837333;4837434;4837764;4837764;4838171;4838171;4838652;4838652;4838970;4838970;4839219;4839219;4839598;4839598;4839916;4839916;4840337;4840337;4840615;4840615;4840838;4840838;4843619;4843619;4843910;4844225;4844225	4837228;4837254;4837671;4837671;4837891;4837891;4838401;4838401;4838873;4838873;4839112;4839112;4839499;4839499;4839783;4839783;4840050;4840050;4840500;4840500;4840756;4840756;4840993;4840993;4843697;4843741;4843995;4844278;4844283	-;-;-;-;-;-;-;-;-;-;-;-;-;-;-;-;-;-;-;-;-;-;-;-;-;-;-;-;-	5005	306	616	357	410	434	575	394	428	445	462	395	225	403	416	524	357	561	473	325	388	169	343	419	247	427	456	410	253	196	277
ENSONIG00000009697	GL831134.1;GL831134.1;GL831134.1;GL831134.1;GL831134.1;GL831134.1;GL831134.1;GL831134.1;GL831134.1;GL831134.1;GL831134.1;GL831134.1;GL831134.1;GL831134.1;GL831134.1;GL831134.1;GL831134.1;GL831134.1;GL831134.1;GL831134.1;GL831134.1;GL831134.1;GL831134.1;GL831134.1;GL831134.1;GL831134.1;GL831134.1;GL831134.1;GL831134.1;GL831134.1;GL831134.1	4893205;4893409;4893604;4893651;4893904;4893904;4894356;4894356;4894757;4894757;4894988;4894988;4895275;4895275;4895525;4895525;4895851;4895851;4896199;4896199;4896843;4896843;4897635;4897635;4898058;4898073;4898298;4898385;4898655;4899029;4899029	4893243;4893499;4893812;4893812;4894008;4894008;4894511;4894511;4894901;4894901;4895142;4895142;4895409;4895409;4895710;4895710;4896098;4896098;4896341;4896341;4897061;4897061;4897883;4897856;4898173;4898173;4898627;4898627;4898690;4899226;4901809	+;+;+;+;+;+;+;+;+;+;+;+;+;+;+;+;+;+;+;+;+;+;+;+;+;+;+;+;+;+;+	5343	419	576	341	494	513	561	448	541	634	452	695	308	373	555	882	407	760	560	337	417	428	446	480	377	679	544	416	338	235	532
ENSONIG00000009709	GL831134.1;GL831134.1;GL831134.1;GL831134.1;GL831134.1;GL831134.1;GL831134.1;GL831134.1;GL831134.1;GL831134.1;GL831134.1;GL831134.1;GL831134.1;GL831134.1;GL831134.1;GL831134.1;GL831134.1;GL831134.1;GL831134.1;GL831134.1;GL831134.1;GL831134.1;GL831134.1;GL831134.1;GL831134.1;GL831134.1;GL831134.1;GL831134.1;GL831134.1;GL831134.1;GL831134.1;GL831134.1	5001056;5003418;5035852;5036468;5036953;5036956;5041684;5041684;5042750;5042750;5045813;5045813;5046211;5046211;5047381;5047381;5048002;5048002;5048909;5048909;5049872;5049872;5051072;5051072;5052120;5052120;5052588;5052588;5058801;5058801;5061546;5061546	5001751;5003526;5035886;5036520;5037164;5037164;5041851;5041851;5042905;5042905;5045957;5045957;5046383;5046383;5047518;5047518;5048187;5048187;5049162;5049162;5050014;5050014;5051305;5051305;5052353;5052353;5052727;5052727;5058965;5058965;5061752;5065793	+;+;+;+;+;+;+;+;+;+;+;+;+;+;+;+;+;+;+;+;+;+;+;+;+;+;+;+;+;+;+;+	7489	3491	5347	2615	4343	3923	5492	2892	4711	3922	4045	4147	2724	3879	4521	5249	3812	4750	3452	2931	3189	3395	3599	4309	3403	6017	3713	3717	3110	1821	3345
ENSONIG00000022948	GL831134.1;GL831134.1	5075863;5079009	5076090;5079565	+;+	785	0	0	0	1	5	0	6	7	0	0	2	0	0	0	0	0	0	0	0	0	0	0	3	1	7	0	0	0	0	1
ENSONIG00000009731	GL831134.1;GL831134.1;GL831134.1;GL831134.1;GL831134.1	5154850;5155537;5156097;5156959;5157674	5154941;5155954;5156261;5157039;5158768	+;+;+;+;+	1851	0	4	2	0	0	0	0	5	0	4	0	2	0	12	0	3	0	0	0	0	0	0	0	1	0	0	8	0	2	0
ENSONIG00000009733	GL831134.1;GL831134.1;GL831134.1;GL831134.1;GL831134.1	5167548;5173810;5174654;5175953;5178551	5168107;5173988;5174798;5176258;5181048	+;+;+;+;+	3688	43	64	165	64	56	38	35	42	53	53	321	45	64	56	66	54	46	23	36	209	53	43	51	36	43	14	16	18	15	29
ENSONIG00000009734	GL831134.1;GL831134.1;GL831134.1;GL831134.1;GL831134.1;GL831134.1;GL831134.1	5204529;5206051;5206346;5206569;5206876;5207158;5208644	5205967;5206113;5206465;5206691;5207000;5207284;5208745	-;-;-;-;-;-;-	2099	3041	4256	2182	4020	3975	5539	3110	4727	3271	3010	4584	2937	4173	3860	6013	3786	4130	3128	2337	2950	3373	4015	4035	3283	6100	3474	2652	2582	1666	3146
ENSONIG00000009737	GL831134.1;GL831134.1;GL831134.1;GL831134.1;GL831134.1;GL831134.1;GL831134.1;GL831134.1;GL831134.1;GL831134.1;GL831134.1;GL831134.1;GL831134.1;GL831134.1;GL831134.1;GL831134.1;GL831134.1;GL831134.1;GL831134.1;GL831134.1;GL831134.1	5209547;5209550;5210101;5210101;5210288;5210288;5212113;5212113;5213431;5213431;5214133;5214133;5214627;5214627;5216088;5216118;5217578;5217578;5218134;5218955;5218955	5209618;5209618;5210177;5210177;5210372;5210372;5212269;5212269;5213661;5213661;5214303;5214303;5214704;5214704;5216240;5216240;5217708;5217708;5218196;5220602;5218981	+;+;+;+;+;+;+;+;+;+;+;+;+;+;+;+;+;+;+;+;+	2866	9373	13937	6875	9073	9313	13827	7174	11272	9668	8971	9860	6209	9302	10821	10724	8227	11746	8253	7518	7628	6712	8248	9420	7952	12517	8718	8113	7687	4374	8278
ENSONIG00000009740	GL831134.1;GL831134.1;GL831134.1;GL831134.1;GL831134.1;GL831134.1;GL831134.1;GL831134.1	5241334;5256065;5281674;5285019;5285320;5312256;5318137;5318931	5241475;5256265;5284970;5285185;5285404;5312387;5318255;5318963	+;+;+;+;+;+;+;+	4176	1538	2342	1002	1820	1324	2213	1192	1725	1566	1640	1279	1151	1655	2049	2018	1337	1895	1322	1280	1087	1204	1424	2053	1804	1532	1389	1322	1183	760	1168
ENSONIG00000026907	GL831134.1;GL831134.1	5319888;5323906	5320177;5323957	-;-	342	0	7	1	12	8	3	5	3	1	12	0	2	17	3	0	4	1	0	1	2	2	4	9	13	3	1	9	2	0	1
ENSONIG00000009742	GL831134.1;GL831134.1;GL831134.1	5336763;5342233;5343069	5338768;5342399;5343621	-;-;-	2726	245	504	271	261	382	305	205	203	251	356	210	118	276	348	229	301	254	249	212	215	234	219	319	172	147	243	244	223	110	337
ENSONIG00000009743	GL831134.1;GL831134.1;GL831134.1;GL831134.1;GL831134.1;GL831134.1;GL831134.1;GL831134.1;GL831134.1;GL831134.1;GL831134.1;GL831134.1;GL831134.1;GL831134.1;GL831134.1;GL831134.1;GL831134.1;GL831134.1;GL831134.1;GL831134.1;GL831134.1;GL831134.1;GL831134.1;GL831134.1;GL831134.1;GL831134.1;GL831134.1;GL831134.1	5355589;5355827;5356014;5356314;5356542;5357069;5357410;5359483;5359875;5360261;5360481;5360677;5361063;5361764;5362491;5368576;5370626;5373087;5373951;5374316;5374536;5374818;5375177;5375464;5377627;5377833;5378044;5378592	5355712;5355912;5356088;5356425;5356627;5357213;5357477;5359527;5359948;5360324;5360582;5360796;5361141;5361765;5362601;5368744;5370763;5373181;5374085;5374413;5374718;5374925;5375266;5375590;5377743;5377956;5378134;5378694	+;+;+;+;+;+;+;+;+;+;+;+;+;+;+;+;+;+;+;+;+;+;+;+;+;+;+;+	2871	1098	1327	659	1206	999	1688	801	1124	1315	970	1055	713	1299	1134	1225	974	1276	1238	692	859	836	1144	1408	955	1246	1054	1027	834	609	903
ENSONIG00000009745	GL831134.1;GL831134.1;GL831134.1;GL831134.1;GL831134.1;GL831134.1;GL831134.1;GL831134.1;GL831134.1;GL831134.1;GL831134.1;GL831134.1;GL831134.1;GL831134.1;GL831134.1;GL831134.1;GL831134.1;GL831134.1;GL831134.1;GL831134.1;GL831134.1;GL831134.1;GL831134.1;GL831134.1;GL831134.1;GL831134.1;GL831134.1;GL831134.1;GL831134.1	5381319;5381319;5382859;5382859;5383009;5383009;5383289;5383289;5383465;5383465;5383678;5383678;5383877;5383877;5384063;5384063;5384273;5384273;5384917;5384917;5385171;5385815;5385815;5386100;5386100;5387702;5387702;5390454;5390454	5381408;5381408;5382897;5382897;5383113;5383113;5383386;5383386;5383588;5383588;5383787;5383787;5383984;5383984;5384156;5384156;5384441;5384441;5385125;5385316;5385316;5385929;5385929;5386228;5386228;5387750;5387750;5390596;5390624	-;-;-;-;-;-;-;-;-;-;-;-;-;-;-;-;-;-;-;-;-;-;-;-;-;-;-;-;-	1801	339	446	210	384	391	534	254	436	461	372	323	256	352	440	567	247	315	272	184	237	306	405	332	379	350	330	294	238	184	327
ENSONIG00000009751	GL831134.1;GL831134.1;GL831134.1;GL831134.1;GL831134.1;GL831134.1;GL831134.1;GL831134.1;GL831134.1;GL831134.1;GL831134.1;GL831134.1;GL831134.1;GL831134.1;GL831134.1;GL831134.1;GL831134.1;GL831134.1;GL831134.1;GL831134.1;GL831134.1;GL831134.1;GL831134.1;GL831134.1;GL831134.1;GL831134.1;GL831134.1;GL831134.1;GL831134.1;GL831134.1;GL831134.1;GL831134.1;GL831134.1;GL831134.1;GL831134.1;GL831134.1;GL8…	5393218;5393658;5395076;5395292;5395642;5396703;5396968;5397207;5397518;5399918;5400177;5400520;5400770;5401009;5401221;5401506;5401711;5402132;5402355;5402645;5402729;5402878;5403198;5403479;5403758;5403954;5404177;5404472;5404873;5405094;5405417;5405782;5405986;5406110;5406206;5406467;5406531;5406624;5406726;5406937;5407153;5407325;5408114;5411976;5412418;5412585;5414153;5414779;5415015;5417118…	5393346;5393674;5395195;5395385;5395796;5396868;5397123;5397384;5397651;5400038;5400311;5400650;5400910;5401107;5401382;5401601;5401855;5402259;5402507;5402694;5402798;5403069;5403349;5403649;5403880;5404053;5404318;5404626;5404989;5405290;5405581;5405893;5406096;5406188;5406308;5406508;5406603;5406690;5406834;5407037;5407233;5407443;5408227;5412206;5412501;5412686;5414314;5414919;5415159;5417322…	-;-;-;-;-;-;-;-;-;-;-;-;-;-;-;-;-;-;-;-;-;-;-;-;-;-;-;-;-;-;-;-;-;-;-;-;-;-;-;-;-;-;-;-;-;-;-;-;-;-;-;-;-;-;-;-;-;-;-;-;-;-;-;-;-;-;-;-;-;-;-;-;-;-;-;-;-;-;-;-;-;-;-;-;-;-	11197	231	500	241	445	344	438	209	314	387	307	277	180	373	387	338	238	336	239	212	212	210	287	301	351	335	260	270	264	178	271
ENSONIG00000009758	GL831134.1;GL831134.1;GL831134.1;GL831134.1;GL831134.1;GL831134.1;GL831134.1;GL831134.1;GL831134.1;GL831134.1;GL831134.1;GL831134.1;GL831134.1;GL831134.1	5453117;5455825;5456217;5456556;5458120;5458540;5458786;5459032;5459290;5459598;5460422;5460588;5460888;5461130	5453149;5455936;5456342;5456581;5458231;5458687;5458844;5459151;5459446;5459746;5460503;5460807;5461028;5462699	+;+;+;+;+;+;+;+;+;+;+;+;+;+	3055	1076	1350	773	1097	1047	1289	858	1494	1185	944	1180	755	1049	1116	1544	906	1119	896	865	908	896	807	1112	985	1229	1081	797	991	504	861
ENSONIG00000009764	GL831134.1;GL831134.1;GL831134.1;GL831134.1;GL831134.1;GL831134.1;GL831134.1;GL831134.1;GL831134.1;GL831134.1	5463275;5464029;5464386;5464669;5464808;5465682;5466342;5466565;5466763;5466963	5463382;5464118;5464442;5464734;5464903;5465873;5466425;5466648;5466864;5467082	+;+;+;+;+;+;+;+;+;+	999	73	85	103	93	68	100	60	68	116	82	111	78	83	157	70	46	67	108	56	114	74	96	94	95	44	62	64	55	37	59
ENSONIG00000009766	GL831134.1;GL831134.1	5471023;5472697	5471577;5472816	+;+	675	214	318	205	298	277	349	204	321	235	246	231	238	359	353	403	266	366	190	178	201	250	254	271	289	324	239	232	213	146	261
ENSONIG00000009767	GL831134.1;GL831134.1;GL831134.1;GL831134.1;GL831134.1;GL831134.1;GL831134.1;GL831134.1;GL831134.1;GL831134.1;GL831134.1;GL831134.1;GL831134.1;GL831134.1;GL831134.1;GL831134.1;GL831134.1	5501727;5502872;5503055;5503292;5503432;5503961;5504187;5505535;5505670;5506141;5507882;5510195;5512522;5522484;5524386;5525734;5526888	5501758;5502965;5503201;5503329;5503597;5504087;5504241;5505580;5505728;5506222;5507988;5510246;5512757;5522739;5524451;5525845;5527501	-;-;-;-;-;-;-;-;-;-;-;-;-;-;-;-;-	2289	202	473	235	335	279	377	237	314	266	253	324	206	294	309	332	220	304	271	225	189	215	292	278	388	347	226	202	253	152	199
ENSONIG00000009769	GL831134.1;GL831134.1;GL831134.1;GL831134.1;GL831134.1;GL831134.1;GL831134.1;GL831134.1;GL831134.1;GL831134.1;GL831134.1;GL831134.1;GL831134.1;GL831134.1;GL831134.1;GL831134.1;GL831134.1;GL831134.1;GL831134.1;GL831134.1;GL831134.1;GL831134.1;GL831134.1;GL831134.1;GL831134.1;GL831134.1;GL831134.1;GL831134.1;GL831134.1;GL831134.1;GL831134.1;GL831134.1;GL831134.1;GL831134.1;GL831134.1;GL831134.1;GL8…	5539729;5539956;5541409;5541578;5541804;5542037;5542126;5542325;5542553;5544070;5545356;5545945;5546644;5547155;5547234;5547505;5547505;5547769;5547769;5548011;5548011;5548420;5548420;5548797;5548876;5548876;5550220;5551147;5551147;5551522;5551522;5551693;5551693;5551861;5551861;5552159;5552159;5553887;5553943;5555009;5555143;5555483;5555671;5556026;5556050;5556785;5557239;5557338;5558509;5558509…	5539821;5540064;5541482;5541694;5541954;5542077;5542236;5542461;5543669;5544077;5545435;5546090;5546725;5547413;5547413;5547652;5547613;5547898;5547895;5548175;5548184;5548611;5548636;5548840;5550162;5550513;5550513;5551379;5551379;5551582;5551582;5551759;5551780;5551972;5551972;5553762;5553758;5554194;5554202;5555458;5555980;5555613;5555845;5557003;5556770;5556873;5557436;5557436;5558582;5558582…	-;-;-;-;-;-;-;-;-;-;-;-;-;-;-;-;-;-;-;-;-;-;-;-;-;-;-;-;-;-;-;-;-;-;-;-;-;-;-;-;-;-;-;-;-;-;-;-;-;-;-;-;-;-;-;-;-;-;-;-;-;-;-;-;-;-;-;-;-;-;-;-;-;-;-;-;-;-;-;-;-;-;-;-;-;-;-;-;-	12254	1405	2547	815	1283	1465	2660	1207	1409	1569	1706	1362	1019	1361	1595	1396	1117	1451	1010	1063	1018	991	1540	1679	1623	767	1111	1150	1190	677	1000
ENSONIG00000025614	GL831134.1;GL831134.1;GL831134.1	5591568;5594302;5614937	5591699;5594390;5615716	-;-;-	1001	159	376	108	162	193	286	171	209	260	254	115	154	195	203	181	180	194	186	188	119	174	253	230	294	26	174	121	167	89	145
ENSONIG00000026886	GL831134.1;GL831134.1;GL831134.1	5664226;5688057;5688882	5664311;5688185;5689065	-;-;-	399	1	0	6	1	0	0	0	2	4	3	1	0	1	2	5	2	0	2	1	0	1	3	7	4	2	5	1	0	2	4
ENSONIG00000009772	GL831134.1;GL831134.1;GL831134.1;GL831134.1;GL831134.1;GL831134.1;GL831134.1;GL831134.1;GL831134.1;GL831134.1;GL831134.1;GL831134.1;GL831134.1;GL831134.1;GL831134.1;GL831134.1;GL831134.1;GL831134.1;GL831134.1;GL831134.1;GL831134.1;GL831134.1;GL831134.1;GL831134.1;GL831134.1;GL831134.1;GL831134.1;GL831134.1	5696136;5696268;5696378;5697141;5702389;5710098;5710311;5710462;5710916;5719270;5725094;5725830;5726052;5728238;5728415;5728605;5728780;5728909;5729796;5729952;5730271;5732110;5732415;5732581;5732778;5732957;5733117;5734438	5696145;5696276;5696412;5697255;5702487;5710198;5710385;5710514;5710997;5719390;5725248;5725927;5726178;5728276;5728522;5728696;5728827;5729021;5729843;5730050;5730340;5732304;5732469;5732683;5732833;5733029;5733190;5734578	+;+;+;+;+;+;+;+;+;+;+;+;+;+;+;+;+;+;+;+;+;+;+;+;+;+;+;+	2394	1492	2399	1057	1802	1795	2736	1390	1883	1835	1807	1922	1238	1868	2081	2165	1824	2122	1775	1367	1683	1555	1727	2028	1842	1965	1684	1453	1498	1047	1588
ENSONIG00000009783	GL831134.1;GL831134.1;GL831134.1;GL831134.1;GL831134.1;GL831134.1;GL831134.1;GL831134.1;GL831134.1;GL831134.1;GL831134.1;GL831134.1;GL831134.1;GL831134.1;GL831134.1;GL831134.1;GL831134.1;GL831134.1;GL831134.1;GL831134.1;GL831134.1;GL831134.1;GL831134.1;GL831134.1;GL831134.1;GL831134.1	5738752;5739833;5740239;5743958;5744325;5744627;5744811;5744998;5745201;5745589;5745819;5746102;5746304;5747675;5748074;5748503;5748688;5748947;5751544;5754479;5756851;5757495;5757630;5758213;5762725;5762913	5739760;5740128;5740270;5744063;5744492;5744716;5744884;5745076;5745359;5745731;5745964;5746157;5746306;5747974;5748199;5748548;5748790;5749087;5753116;5754490;5756868;5757549;5757708;5758308;5762746;5763044	-;-;-;-;-;-;-;-;-;-;-;-;-;-;-;-;-;-;-;-;-;-;-;-;-;-	5064	1137	1772	1010	1295	1399	2080	950	1670	1353	1251	1280	930	1291	1454	1488	1271	1449	1278	995	1055	1030	1237	1184	1328	1100	1148	1096	1041	569	1078
ENSONIG00000009788	GL831134.1;GL831134.1;GL831134.1;GL831134.1;GL831134.1;GL831134.1;GL831134.1;GL831134.1;GL831134.1	5776997;5777141;5777335;5777593;5779853;5782716;5783797;5785271;5785598	5777044;5777217;5777381;5777675;5779870;5782781;5783980;5785377;5785784	-;-;-;-;-;-;-;-;-	817	108	156	57	113	107	126	146	165	106	89	76	98	175	113	163	107	141	107	64	90	113	79	114	127	161	99	95	63	51	106
ENSONIG00000009796	GL831134.1;GL831134.1;GL831134.1;GL831134.1;GL831134.1;GL831134.1;GL831134.1;GL831134.1;GL831134.1	5790666;5794189;5795420;5796450;5797819;5798163;5799915;5839018;5839895	5790758;5794278;5795532;5796609;5797975;5798332;5800159;5839091;5840079	-;-;-;-;-;-;-;-;-	1287	821	1330	650	1139	1106	1562	824	1438	991	943	1192	813	1046	1187	1587	1031	1141	882	814	809	929	991	1193	1021	1554	951	1017	743	566	821
ENSONIG00000009803	GL831134.1;GL831134.1;GL831134.1;GL831134.1;GL831134.1;GL831134.1;GL831134.1;GL831134.1;GL831134.1;GL831134.1;GL831134.1;GL831134.1;GL831134.1;GL831134.1	5878622;5878687;5879366;5879366;5879634;5879634;5880459;5880459;5880723;5880723;5880960;5880960;5881275;5881275	5878642;5878715;5879553;5879553;5879795;5879795;5880605;5880605;5880850;5880850;5881159;5881159;5884050;5881587	+;+;+;+;+;+;+;+;+;+;+;+;+;+	3651	30186	40599	23211	38726	34857	56247	29824	51890	40849	33872	35659	24925	37805	36189	57430	37814	48226	34829	26232	32717	33602	29052	36472	31065	82209	41018	29234	30461	20101	34373
ENSONIG00000025849	GL831134.1;GL831134.1	5946627;5948106	5946938;5948236	-;-	443	1	12	5	1	10	6	1	7	10	8	4	1	2	5	9	2	4	0	2	5	5	12	1	1	3	4	2	0	0	3
ENSONIG00000009807	GL831134.1;GL831134.1;GL831134.1;GL831134.1;GL831134.1;GL831134.1;GL831134.1;GL831134.1;GL831134.1;GL831134.1;GL831134.1;GL831134.1;GL831134.1;GL831134.1;GL831134.1;GL831134.1;GL831134.1;GL831134.1;GL831134.1;GL831134.1;GL831134.1;GL831134.1;GL831134.1;GL831134.1;GL831134.1;GL831134.1;GL831134.1;GL831134.1;GL831134.1	5957085;5959230;5959452;5959801;5960085;5964344;5964549;5964689;5964893;5965515;5965879;5966993;5967324;5967819;5968077;5968602;5969450;5969687;5969904;5970162;5971123;5971365;5971697;5974425;5975591;5975945;5976198;5978642;5978876	5957372;5959281;5959608;5959896;5960193;5964449;5964589;5964721;5965069;5965726;5966026;5967232;5967496;5967975;5968243;5968696;5969578;5969817;5970004;5970302;5971281;5971613;5971819;5974664;5975793;5976096;5976415;5978783;5979882	+;+;+;+;+;+;+;+;+;+;+;+;+;+;+;+;+;+;+;+;+;+;+;+;+;+;+;+;+	5246	871	1424	715	969	935	1335	589	1088	970	993	980	531	948	1093	1262	887	995	886	741	769	773	1049	1151	973	946	834	712	760	541	684
ENSONIG00000009810	GL831134.1;GL831134.1;GL831134.1	5984569;5989186;5989474	5984859;5989344;5990451	+;+;+	1428	7	24	3	15	20	28	8	40	8	10	14	4	12	5	32	4	32	7	9	11	18	7	27	13	17	4	9	15	1	19
ENSONIG00000009811	GL831134.1;GL831134.1;GL831134.1;GL831134.1;GL831134.1	5995706;5996079;5997620;5997620;5998334	5996813;5996813;6000168;5997839;5998386	+;+;+;+;+	3657	158	166	106	214	122	169	96	268	111	113	144	133	212	164	243	104	221	108	106	101	192	90	203	165	153	104	100	162	93	155
ENSONIG00000009812	GL831134.1;GL831134.1;GL831134.1;GL831134.1;GL831134.1;GL831134.1	6001446;6002236;6002556;6002765;6003071;6005042	6001537;6002386;6002666;6002956;6003208;6005128	-;-;-;-;-;-	771	3517	3608	2711	3187	3512	6425	2375	4222	3636	3514	3588	1960	3685	2607	3976	3180	4627	3582	2701	2668	2721	2964	3920	3025	4841	3903	2881	2573	1745	3332
ENSONIG00000009814	GL831134.1;GL831134.1;GL831134.1;GL831134.1	6007239;6008107;6008296;6008702	6008013;6008193;6008377;6009470	+;+;+;+	1713	106	151	78	101	101	112	101	108	125	105	196	88	125	119	152	147	142	100	70	86	131	134	128	122	129	133	46	75	54	77
ENSONIG00000009815	GL831134.1;GL831134.1;GL831134.1;GL831134.1;GL831134.1;GL831134.1;GL831134.1;GL831134.1;GL831134.1;GL831134.1;GL831134.1;GL831134.1;GL831134.1;GL831134.1;GL831134.1;GL831134.1;GL831134.1;GL831134.1;GL831134.1;GL831134.1;GL831134.1;GL831134.1	6012191;6013472;6014684;6015597;6018057;6019497;6021098;6021484;6021918;6022236;6022969;6023247;6023507;6023756;6023965;6024429;6025111;6026147;6026469;6027075;6027422;6036868	6013383;6013622;6014891;6015792;6018949;6019760;6021304;6021608;6022087;6022322;6023109;6023361;6023660;6023862;6024049;6024571;6025162;6026348;6026590;6027229;6027514;6037316	-;-;-;-;-;-;-;-;-;-;-;-;-;-;-;-;-;-;-;-;-;-	5312	265	514	286	231	329	651	330	371	415	495	565	232	338	373	310	326	451	350	241	441	247	304	440	420	285	425	185	236	194	304
ENSONIG00000009822	GL831134.1;GL831134.1;GL831134.1;GL831134.1;GL831134.1;GL831134.1;GL831134.1;GL831134.1;GL831134.1;GL831134.1;GL831134.1;GL831134.1;GL831134.1;GL831134.1;GL831134.1	6058128;6058385;6059161;6059566;6059849;6060161;6062535;6063095;6063565;6064460;6064763;6065235;6065423;6067137;6069096	6058330;6059014;6059307;6059740;6060041;6060285;6062611;6063252;6063676;6064567;6064964;6065329;6065560;6067271;6069300	-;-;-;-;-;-;-;-;-;-;-;-;-;-;-	2703	32	41	16	44	30	35	9	15	15	43	5	22	19	26	44	27	36	19	32	31	13	24	27	26	45	18	25	7	8	19
ENSONIG00000009825	GL831134.1;GL831134.1;GL831134.1;GL831134.1;GL831134.1;GL831134.1;GL831134.1;GL831134.1	6092683;6095176;6095341;6095566;6095833;6096479;6096747;6097020	6094889;6095251;6095488;6095758;6095990;6096576;6096934;6097451	-;-;-;-;-;-;-;-	3500	1	22	2	0	15	10	8	8	1	21	8	4	4	25	8	9	15	7	5	0	12	11	13	19	13	11	17	8	0	8
ENSONIG00000009832	GL831134.1;GL831134.1;GL831134.1;GL831134.1;GL831134.1;GL831134.1;GL831134.1;GL831134.1;GL831134.1;GL831134.1;GL831134.1;GL831134.1;GL831134.1;GL831134.1;GL831134.1;GL831134.1;GL831134.1;GL831134.1;GL831134.1;GL831134.1;GL831134.1;GL831134.1;GL831134.1;GL831134.1	6097817;6107682;6108408;6108889;6109386;6112318;6115117;6116683;6117214;6120668;6122992;6123476;6123634;6125317;6125716;6126144;6126782;6127701;6128112;6129581;6130202;6130331;6131996;6132206	6097982;6107813;6108536;6109022;6109466;6112396;6115242;6116767;6117315;6120752;6123147;6123545;6123744;6125536;6125849;6126388;6126842;6127713;6128143;6129657;6130240;6130435;6132082;6132397	+;+;+;+;+;+;+;+;+;+;+;+;+;+;+;+;+;+;+;+;+;+;+;+	2661	397	567	158	468	343	385	356	189	241	446	322	351	466	518	319	399	199	160	204	100	362	524	367	558	143	230	214	176	171	238
ENSONIG00000009839	GL831134.1;GL831134.1;GL831134.1;GL831134.1;GL831134.1;GL831134.1;GL831134.1;GL831134.1;GL831134.1;GL831134.1;GL831134.1;GL831134.1;GL831134.1;GL831134.1;GL831134.1;GL831134.1;GL831134.1;GL831134.1;GL831134.1;GL831134.1;GL831134.1;GL831134.1;GL831134.1;GL831134.1;GL831134.1;GL831134.1;GL831134.1;GL831134.1;GL831134.1;GL831134.1;GL831134.1	6147237;6148795;6149196;6149392;6149869;6150103;6150467;6150692;6150974;6151281;6151859;6152048;6152249;6153578;6153893;6154216;6154577;6155338;6156056;6156526;6156835;6157018;6157517;6158011;6158874;6159178;6161176;6162811;6163291;6164454;6164646	6147418;6148935;6149277;6149535;6149967;6150184;6150592;6150864;6151090;6151515;6151958;6152165;6152527;6153682;6154129;6154362;6154945;6155457;6156189;6156721;6156923;6157369;6157920;6158080;6158963;6159329;6161275;6162981;6163311;6164540;6164720	-;-;-;-;-;-;-;-;-;-;-;-;-;-;-;-;-;-;-;-;-;-;-;-;-;-;-;-;-;-;-	4797	564	1457	558	797	777	1519	645	1050	970	905	863	523	791	972	900	651	1144	923	738	661	610	874	908	729	1033	903	796	727	404	722
ENSONIG00000022197	GL831134.1	6153771	6153845	-	75	0	1	0	1	2	1	0	1	0	0	0	0	1	1	0	0	0	0	0	0	0	0	0	0	0	0	0	0	0	0
ENSONIG00000021797	GL831134.1	6154458	6154535	-	78	0	0	0	0	0	0	0	0	0	0	15	3	1	2	3	3	0	0	0	0	6	3	5	4	0	0	0	0	0	0
ENSONIG00000009845	GL831134.1;GL831134.1;GL831134.1;GL831134.1;GL831134.1;GL831134.1;GL831134.1;GL831134.1;GL831134.1;GL831134.1;GL831134.1;GL831134.1;GL831134.1;GL831134.1;GL831134.1;GL831134.1;GL831134.1;GL831134.1;GL831134.1;GL831134.1;GL831134.1;GL831134.1	6169650;6169828;6175743;6176010;6176399;6177562;6178159;6178375;6178482;6179483;6180451;6180775;6181006;6181322;6182508;6182775;6183175;6183544;6184436;6184633;6184884;6185144	6169717;6170020;6175927;6176077;6176549;6177734;6178212;6178395;6178530;6179542;6180479;6180812;6181052;6181514;6182692;6182842;6183325;6183708;6184532;6184796;6185037;6185302	-;-;-;-;-;-;-;-;-;-;-;-;-;-;-;-;-;-;-;-;-;-	2472	65	87	54	111	116	169	64	94	85	126	158	118	102	124	104	86	115	71	55	46	96	41	99	61	108	86	55	94	44	76
ENSONIG00000009852	GL831134.1;GL831134.1;GL831134.1;GL831134.1;GL831134.1;GL831134.1;GL831134.1;GL831134.1;GL831134.1;GL831134.1;GL831134.1	6198266;6198562;6200220;6201059;6201674;6205747;6207108;6207367;6207565;6207939;6213077	6198427;6198641;6200727;6201189;6201764;6205893;6207220;6207432;6207629;6208092;6213312	-;-;-;-;-;-;-;-;-;-;-	1753	866	1178	502	789	854	1370	653	955	789	709	840	707	886	878	1250	738	1020	883	710	742	770	833	902	916	1339	711	776	758	390	586
ENSONIG00000009855	GL831134.1;GL831134.1;GL831134.1;GL831134.1;GL831134.1;GL831134.1;GL831134.1;GL831134.1;GL831134.1;GL831134.1	6217717;6218583;6218779;6218968;6219240;6219505;6219813;6220098;6220346;6221161	6217893;6218669;6218883;6219084;6219402;6219635;6219878;6220153;6220441;6221200	-;-;-;-;-;-;-;-;-;-	1038	999	1191	518	893	811	1825	1496	975	1373	1484	1230	950	1148	1418	2126	1531	1342	1115	874	992	1020	1209	1198	1032	1906	670	593	998	629	616
ENSONIG00000022885	GL831134.1;GL831134.1;GL831134.1;GL831134.1;GL831134.1;GL831134.1;GL831134.1;GL831134.1;GL831134.1;GL831134.1	6225747;6225747;6227737;6227737;6228011;6228011;6230117;6230117;6230490;6230791	6226307;6226307;6227919;6227919;6228268;6228268;6232374;6230215;6230507;6232374	+;+;+;+;+;+;+;+;+;+	3260	69	214	49	76	93	58	19	76	62	44	31	0	47	36	7	39	94	77	32	45	36	45	58	66	35	85	97	106	27	87
ENSONIG00000009858	GL831134.1;GL831134.1;GL831134.1;GL831134.1;GL831134.1;GL831134.1;GL831134.1;GL831134.1;GL831134.1;GL831134.1;GL831134.1	6232482;6233012;6233370;6233585;6233775;6234399;6234694;6234884;6235240;6235817;6236040	6232666;6233222;6233509;6233681;6233900;6234595;6234788;6235121;6235365;6235934;6236218	+;+;+;+;+;+;+;+;+;+;+	1712	38	87	27	40	68	100	33	104	59	10	53	43	65	44	131	31	58	34	48	60	62	41	25	75	86	46	52	39	27	41
ENSONIG00000009863	GL831134.1;GL831134.1;GL831134.1;GL831134.1;GL831134.1;GL831134.1;GL831134.1	6238006;6238456;6238706;6238894;6239089;6239256;6239643	6238314;6238595;6238811;6238950;6239169;6239446;6239703	-;-;-;-;-;-;-	945	45	119	57	98	72	67	54	97	55	32	29	49	54	19	49	42	32	55	50	86	33	64	49	37	35	85	69	34	26	62
ENSONIG00000009866	GL831134.1;GL831134.1;GL831134.1;GL831134.1;GL831134.1;GL831134.1;GL831134.1;GL831134.1;GL831134.1	6247961;6248070;6249273;6249273;6249871;6252990;6252993;6254871;6254871	6248292;6248292;6249397;6249401;6249904;6253156;6253156;6256091;6254996	+;+;+;+;+;+;+;+;+	1883	2610	3351	1859	2679	2998	3847	2230	3257	2231	2644	2724	1878	2957	2586	3182	2684	2848	2514	1761	2421	2054	2595	2555	2307	3418	2354	2022	1865	1131	2034
ENSONIG00000009867	GL831134.1;GL831134.1;GL831134.1;GL831134.1;GL831134.1	6256981;6257239;6258003;6258431;6258635	6257097;6257342;6258112;6258584;6258662	-;-;-;-;-	513	107	110	54	62	82	120	100	82	71	108	122	64	101	91	141	85	94	126	58	83	74	100	107	87	116	58	55	74	50	45
ENSONIG00000009868	GL831134.1;GL831134.1;GL831134.1;GL831134.1;GL831134.1;GL831134.1;GL831134.1;GL831134.1;GL831134.1;GL831134.1;GL831134.1	6264882;6265323;6265597;6266657;6266919;6267143;6267314;6267472;6269167;6269354;6269953	6264989;6265451;6265692;6266726;6267017;6267227;6267384;6267572;6269231;6269546;6270228	-;-;-;-;-;-;-;-;-;-;-	1293	11	45	18	28	22	37	17	20	49	12	17	5	11	7	2	12	11	17	15	27	22	15	29	22	18	29	20	12	12	33
ENSONIG00000009874	GL831134.1;GL831134.1;GL831134.1;GL831134.1;GL831134.1;GL831134.1;GL831134.1;GL831134.1;GL831134.1;GL831134.1;GL831134.1;GL831134.1;GL831134.1;GL831134.1;GL831134.1;GL831134.1;GL831134.1;GL831134.1;GL831134.1;GL831134.1;GL831134.1;GL831134.1;GL831134.1;GL831134.1;GL831134.1;GL831134.1;GL831134.1;GL831134.1;GL831134.1;GL831134.1;GL831134.1;GL831134.1;GL831134.1;GL831134.1;GL831134.1;GL831134.1;GL8…	6278042;6282494;6282801;6283101;6283415;6283682;6284112;6285527;6285690;6285792;6285963;6286371;6287868;6288194;6289127;6289306;6289480;6289669;6289887;6290155;6290334;6290512;6291094;6291454;6291675;6291909;6292132;6292309;6292405;6292905;6293149;6293355;6293692;6293920;6294087;6294270;6294484;6294643;6294841;6295264;6295432;6296751;6297068;6297811;6298533;6298775;6299083;6299453	6278147;6282567;6282980;6283169;6283593;6283793;6284189;6285592;6285707;6285870;6286041;6286513;6287998;6288273;6289202;6289385;6289586;6289752;6290067;6290227;6290424;6290660;6291272;6291591;6291793;6291994;6292267;6292323;6292582;6292995;6293267;6293410;6293800;6293986;6294171;6294375;6294507;6294757;6294974;6295325;6295577;6296939;6297139;6297920;6298652;6298976;6299201;6299492	+;+;+;+;+;+;+;+;+;+;+;+;+;+;+;+;+;+;+;+;+;+;+;+;+;+;+;+;+;+;+;+;+;+;+;+;+;+;+;+;+;+;+;+;+;+;+;+	5052	6056	10170	3600	8239	6497	10864	5621	5855	6805	7731	7661	5354	8775	9290	7134	6657	7521	5995	5111	5115	5986	7561	9492	8623	5379	5706	5707	5142	3318	5465
ENSONIG00000009884	GL831134.1;GL831134.1	6308591;6309145	6308973;6310216	+;+	1455	8	5	5	6	5	1	0	3	2	0	1	0	10	2	1	0	1	0	1	0	6	4	1	2	0	2	1	6	1	4
ENSONIG00000009886	GL831134.1;GL831134.1;GL831134.1;GL831134.1;GL831134.1;GL831134.1;GL831134.1;GL831134.1	6314146;6316424;6317072;6317543;6317801;6318076;6318739;6319466	6314379;6316482;6317125;6317648;6317912;6318169;6318805;6321866	+;+;+;+;+;+;+;+	3127	19014	23589	12446	17102	17230	27196	15733	21474	21340	20754	20794	13704	18912	23792	24029	19391	24298	17563	14474	16644	14715	17102	19895	15813	23960	17158	13950	14407	9154	13865
ENSONIG00000009888	GL831134.1;GL831134.1;GL831134.1;GL831134.1;GL831134.1;GL831134.1;GL831134.1;GL831134.1;GL831134.1;GL831134.1;GL831134.1;GL831134.1;GL831134.1	6322878;6323739;6325426;6326123;6326263;6326546;6326765;6326974;6328535;6328784;6329494;6329718;6330276	6323424;6323913;6325551;6326188;6326406;6326709;6326886;6327043;6328654;6328905;6329586;6329787;6330359	+;+;+;+;+;+;+;+;+;+;+;+;+	1903	8	66	18	17	9	25	22	13	11	20	33	10	31	23	18	20	21	7	25	21	18	42	27	10	25	3	31	29	11	25
ENSONIG00000009890	GL831134.1;GL831134.1;GL831134.1;GL831134.1;GL831134.1;GL831134.1;GL831134.1;GL831134.1;GL831134.1;GL831134.1;GL831134.1	6354186;6354948;6356182;6357716;6357956;6358700;6359084;6359388;6359613;6359932;6360469	6354526;6355718;6356350;6357860;6358045;6358995;6359259;6359489;6359809;6360063;6361937	+;+;+;+;+;+;+;+;+;+;+	3888	164	369	131	301	303	465	237	381	279	257	410	328	393	306	565	275	494	273	217	255	293	294	326	302	375	258	315	245	134	203
ENSONIG00000009894	GL831134.1;GL831134.1;GL831134.1;GL831134.1;GL831134.1;GL831134.1;GL831134.1	6369201;6369237;6369437;6375331;6375331;6375508;6375508	6369396;6369396;6369532;6375354;6375354;6376064;6376064	+;+;+;+;+;+;+	873	57	82	48	49	80	113	60	92	55	79	53	66	90	86	114	79	80	68	88	55	70	100	93	77	108	72	86	58	39	76
ENSONIG00000009896	GL831134.1;GL831134.1;GL831134.1;GL831134.1;GL831134.1;GL831134.1;GL831134.1;GL831134.1;GL831134.1;GL831134.1;GL831134.1;GL831134.1;GL831134.1;GL831134.1;GL831134.1;GL831134.1;GL831134.1;GL831134.1;GL831134.1;GL831134.1;GL831134.1;GL831134.1;GL831134.1;GL831134.1;GL831134.1;GL831134.1;GL831134.1;GL831134.1;GL831134.1;GL831134.1;GL831134.1;GL831134.1;GL831134.1;GL831134.1;GL831134.1;GL831134.1;GL8…	6555368;6558308;6558401;6558652;6558688;6560857;6560857;6561845;6561845;6563285;6563581;6564210;6564698;6565149;6565365;6566155;6567323;6567979;6568818;6568936;6569277;6570015;6570583;6571120;6571510;6571581;6571584;6571866;6571866;6572996;6572996;6576785;6576785;6581257;6581257;6581701;6581701;6582232;6582250;6585245;6585245;6586141;6586141;6588128;6588128;6588353;6588353;6589381;6589541;6590565…	6555481;6558530;6558530;6558752;6558752;6561019;6561019;6562321;6562321;6563301;6563594;6564226;6564758;6565177;6565420;6566160;6567569;6568011;6568890;6568962;6569330;6570117;6570621;6571182;6571549;6571703;6571703;6572009;6572009;6573111;6573111;6576935;6576935;6581435;6581435;6581791;6581791;6582332;6582332;6585347;6585347;6586230;6586230;6588261;6588261;6588482;6588482;6589433;6589620;6590698…	+;+;+;+;+;+;+;+;+;+;+;+;+;+;+;+;+;+;+;+;+;+;+;+;+;+;+;+;+;+;+;+;+;+;+;+;+;+;+;+;+;+;+;+;+;+;+;+;+;+;+;+;+;+;+;+;+;+;+;+;+;+;+;+;+;+;+;+;+;+;+;+;+;+;+;+;+;+;+;+;+;+	9814	2362	4550	1821	3488	2890	4020	2023	3011	2533	2992	3137	2102	3160	3688	3234	2611	3320	2186	1989	2253	2374	2742	3837	3148	2542	2294	2821	2175	1399	2395
ENSONIG00000023295	GL831134.1;GL831134.1	6637513;6638591	6638261;6638945	-;-	1104	3	0	0	0	2	0	0	0	2	0	0	1	0	0	0	0	0	0	0	0	0	0	5	4	0	3	0	0	0	0
ENSONIG00000021433	GL831134.1	6659498	6659830	+	333	52	61	18	55	52	56	31	51	47	51	58	44	58	68	88	44	29	40	25	31	37	52	49	57	44	30	38	19	34	35
ENSONIG00000009909	GL831134.1;GL831134.1;GL831134.1;GL831134.1;GL831134.1;GL831134.1;GL831134.1;GL831134.1;GL831134.1;GL831134.1;GL831134.1;GL831134.1;GL831134.1;GL831134.1;GL831134.1;GL831134.1;GL831134.1;GL831134.1;GL831134.1;GL831134.1;GL831134.1;GL831134.1;GL831134.1;GL831134.1;GL831134.1;GL831134.1;GL831134.1;GL831134.1;GL831134.1;GL831134.1;GL831134.1;GL831134.1;GL831134.1;GL831134.1;GL831134.1;GL831134.1;GL8…	6672043;6675243;6675988;6676251;6676862;6677108;6677771;6680156;6681841;6683365;6684887;6685566;6686406;6687738;6688186;6688630;6688778;6689550;6689865;6690438;6690901;6691247;6691521;6691615;6692262;6692848;6693149;6693462;6695140;6695980;6696084;6696235;6696492;6697721;6697964;6699431;6699918;6701933;6703000;6703773;6704055;6712060	6673453;6675406;6676152;6676347;6677013;6677246;6677901;6680419;6682107;6683628;6685150;6685588;6686506;6687997;6688214;6688728;6688852;6689606;6689930;6690556;6690919;6691399;6691584;6691711;6692333;6692886;6693273;6693551;6695322;6696006;6696148;6696298;6696596;6697850;6698097;6699520;6700050;6701988;6703653;6703964;6704252;6712332	-;-;-;-;-;-;-;-;-;-;-;-;-;-;-;-;-;-;-;-;-;-;-;-;-;-;-;-;-;-;-;-;-;-;-;-;-;-;-;-;-;-	7110	32	29	5	23	18	55	35	35	52	3	15	13	67	52	43	20	46	12	35	32	8	4	30	1	30	10	3	4	19	16
ENSONIG00000009916	GL831134.1;GL831134.1;GL831134.1	6727317;6728413;6728738	6727388;6728577;6728920	+;+;+	420	122	243	74	179	195	254	168	216	116	149	318	184	183	224	305	230	223	168	109	122	194	205	197	196	301	151	161	147	72	142
ENSONIG00000009918	GL831134.1;GL831134.1;GL831134.1;GL831134.1;GL831134.1;GL831134.1	6730564;6731441;6731787;6731975;6735684;6735951	6730581;6731651;6731883;6732074;6735778;6737288	+;+;+;+;+;+	1859	3715	5645	2814	4712	4035	6265	3019	5359	4529	3627	5171	2491	4322	4412	6674	4042	4918	3928	3010	3550	3880	3862	4555	3388	7771	4034	3569	3533	1885	3840
ENSONIG00000009923	GL831134.1;GL831134.1;GL831134.1;GL831134.1;GL831134.1;GL831134.1;GL831134.1;GL831134.1;GL831134.1;GL831134.1;GL831134.1;GL831134.1;GL831134.1;GL831134.1;GL831134.1;GL831134.1;GL831134.1;GL831134.1;GL831134.1;GL831134.1;GL831134.1;GL831134.1;GL831134.1;GL831134.1;GL831134.1;GL831134.1;GL831134.1;GL831134.1;GL831134.1;GL831134.1;GL831134.1	6738275;6739294;6739587;6740756;6740756;6740989;6740989;6741364;6741364;6741614;6741614;6742206;6742206;6742490;6742490;6742900;6742900;6743167;6743167;6744447;6744447;6744677;6744677;6745084;6745084;6745424;6745424;6745720;6745720;6745931;6745931	6738391;6739736;6739736;6740863;6740863;6741105;6741105;6741493;6741493;6741701;6741701;6742301;6742301;6742685;6742685;6743026;6743026;6743282;6743282;6744567;6744567;6744760;6744760;6745246;6745246;6745553;6745553;6745830;6745830;6748414;6746122	+;+;+;+;+;+;+;+;+;+;+;+;+;+;+;+;+;+;+;+;+;+;+;+;+;+;+;+;+;+;+	4631	1502	1997	1023	1626	1941	2421	1411	1750	1531	1593	1773	1208	1766	1862	2234	1640	1614	1316	1046	1500	1437	1504	2017	1580	1277	1274	1141	1251	790	1196
ENSONIG00000009932	GL831134.1;GL831134.1;GL831134.1;GL831134.1;GL831134.1;GL831134.1;GL831134.1;GL831134.1;GL831134.1;GL831134.1;GL831134.1	6816566;6818276;6827236;6827523;6833861;6836929;6837532;6838399;6838645;6842163;6846064	6816713;6818430;6827395;6827634;6833950;6837065;6837722;6838461;6838793;6842266;6848626	+;+;+;+;+;+;+;+;+;+;+	3872	483	794	388	575	649	943	443	778	626	559	628	390	614	565	796	528	620	552	400	438	469	503	647	578	712	580	478	431	293	427
ENSONIG00000009936	GL831134.1;GL831134.1;GL831134.1;GL831134.1;GL831134.1;GL831134.1;GL831134.1;GL831134.1;GL831134.1;GL831134.1;GL831134.1;GL831134.1;GL831134.1;GL831134.1;GL831134.1;GL831134.1;GL831134.1;GL831134.1;GL831134.1;GL831134.1;GL831134.1;GL831134.1;GL831134.1;GL831134.1;GL831134.1;GL831134.1;GL831134.1;GL831134.1;GL831134.1;GL831134.1;GL831134.1;GL831134.1;GL831134.1;GL831134.1;GL831134.1;GL831134.1;GL8…	6855600;6856113;6857698;6857698;6866789;6866789;6867067;6867067;6867250;6867250;6869449;6869449;6869671;6869671;6869858;6869858;6870803;6870803;6871908;6871908;6872143;6872143;6872450;6872450;6872634;6872634;6873611;6873611;6874085;6874121;6875134;6875134;6875371;6875371;6875648;6875648;6877345;6877345;6877801;6877801;6880746;6880746;6881238;6881238;6881734;6881919	6856259;6856259;6857890;6857890;6866978;6866978;6867136;6867136;6867341;6867341;6869557;6869557;6869757;6869757;6869979;6869979;6870950;6870950;6872039;6872039;6872298;6872298;6872542;6872542;6872759;6872759;6873998;6873998;6874609;6874609;6875276;6875276;6875551;6875551;6875928;6875928;6877482;6877482;6877943;6877943;6881148;6881148;6881709;6881811;6881804;6884320	+;+;+;+;+;+;+;+;+;+;+;+;+;+;+;+;+;+;+;+;+;+;+;+;+;+;+;+;+;+;+;+;+;+;+;+;+;+;+;+;+;+;+;+;+;+	7356	195	158	95	253	198	161	170	116	145	152	120	230	244	307	335	243	100	91	116	111	194	253	309	257	86	63	140	111	97	151
ENSONIG00000009940	GL831134.1;GL831134.1;GL831134.1;GL831134.1;GL831134.1;GL831134.1;GL831134.1;GL831134.1;GL831134.1;GL831134.1;GL831134.1;GL831134.1;GL831134.1;GL831134.1;GL831134.1;GL831134.1;GL831134.1;GL831134.1;GL831134.1;GL831134.1;GL831134.1;GL831134.1;GL831134.1;GL831134.1;GL831134.1;GL831134.1;GL831134.1;GL831134.1;GL831134.1;GL831134.1;GL831134.1;GL831134.1;GL831134.1;GL831134.1;GL831134.1;GL831134.1;GL8…	6900144;6900608;6900628;6900780;6900789;6900966;6900966;6901190;6901643;6901643;6901772;6902504;6902504;6902930;6902947;6903187;6903187;6903394;6903394;6903594;6903594;6903768;6903768;6904102;6904102;6904310;6904310;6904450;6904450;6904651;6904651;6904926;6904926;6905246;6905246;6905443;6905443;6905621;6905621;6905781;6905781;6905962;6905962;6906701;6906707	6900426;6900688;6900688;6900877;6900877;6901067;6901067;6901225;6901691;6901691;6901807;6902655;6902650;6903052;6903052;6903284;6903284;6903489;6903489;6903648;6903648;6903930;6903930;6904192;6904192;6904373;6904373;6904541;6904541;6904793;6904793;6905139;6905139;6905356;6905356;6905510;6905510;6905699;6905699;6905861;6905861;6906055;6906055;6906762;6907055	+;+;+;+;+;+;+;+;+;+;+;+;+;+;+;+;+;+;+;+;+;+;+;+;+;+;+;+;+;+;+;+;+;+;+;+;+;+;+;+;+;+;+;+;+	2764	18	41	5	34	13	11	17	25	10	19	25	27	14	32	47	28	13	16	10	20	8	4	12	27	48	44	7	12	27	28
ENSONIG00000025755	GL831134.1;GL831134.1;GL831134.1;GL831134.1	6918724;6919159;6919376;6919806	6918994;6919299;6919494;6920871	+;+;+;+	1597	128	230	107	231	190	305	145	191	186	185	284	109	165	228	351	178	173	179	124	121	137	216	200	198	359	216	229	168	75	122
ENSONIG00000024883	GL831134.1;GL831134.1;GL831134.1;GL831134.1	6922240;6923131;6923350;6923728	6923029;6923268;6923468;6925020	+;+;+;+	2340	8	24	7	8	7	12	13	7	9	5	6	5	7	5	18	5	0	7	4	8	4	12	15	12	13	15	9	5	2	11
ENSONIG00000009947	GL831134.1;GL831134.1;GL831134.1;GL831134.1;GL831134.1;GL831134.1;GL831134.1;GL831134.1;GL831134.1;GL831134.1;GL831134.1;GL831134.1;GL831134.1;GL831134.1;GL831134.1	6927147;6927147;6928931;6928931;6931395;6932733;6932733;6932971;6932971;6933573;6933573;6934011;6934011;6934220;6934220	6927176;6927176;6929040;6929040;6931403;6932850;6932850;6933177;6933177;6933696;6933696;6934104;6934104;6934271;6935905	+;+;+;+;+;+;+;+;+;+;+;+;+;+;+	2378	30807	42011	22214	31287	32726	45705	24370	33905	32948	33721	31401	21949	30811	33122	42190	29004	36570	28696	21650	23874	26802	28001	32921	25932	55424	27126	23234	22254	13881	23419
ENSONIG00000009951	GL831134.1;GL831134.1;GL831134.1;GL831134.1;GL831134.1;GL831134.1;GL831134.1;GL831134.1;GL831134.1;GL831134.1;GL831134.1;GL831134.1;GL831134.1	6937106;6937642;6937717;6937745;6937981;6937981;6938201;6938201;6938395;6938395;6938725;6938929;6938929	6937660;6937671;6937896;6937896;6938067;6938067;6938242;6938242;6938499;6938499;6938769;6939042;6939586	+;+;+;+;+;+;+;+;+;+;+;+;+	1683	44	52	7	113	90	90	27	109	90	61	91	18	70	68	100	85	37	62	34	54	68	77	62	37	65	56	35	21	15	37
ENSONIG00000009952	GL831134.1;GL831134.1;GL831134.1;GL831134.1;GL831134.1;GL831134.1;GL831134.1;GL831134.1;GL831134.1	6941030;6942508;6942970;6943163;6943438;6943730;6944705;6945012;6945440	6941576;6942842;6943085;6943266;6943612;6943847;6944790;6945283;6945537	+;+;+;+;+;+;+;+;+	1851	47	101	25	124	110	148	43	124	77	77	114	74	130	118	137	82	76	39	44	35	63	63	90	83	81	73	58	70	34	75
ENSONIG00000009954	GL831134.1;GL831134.1	6947758;6948559	6947779;6949157	-;-	621	10	17	8	14	19	9	9	12	10	6	23	7	7	13	10	10	16	15	11	5	20	15	9	20	11	8	5	13	7	15
ENSONIG00000009956	GL831134.1;GL831134.1;GL831134.1;GL831134.1	6951290;6954515;6956219;6960333	6954319;6954676;6956393;6960731	-;-;-;-	3766	3410	5100	2790	3848	3655	5452	2963	4383	4512	3430	3520	2420	3540	4461	4569	3160	4544	3094	2918	3180	3103	3353	4067	3109	5484	3415	3122	2988	1769	3061
ENSONIG00000009958	GL831134.1;GL831134.1;GL831134.1;GL831134.1;GL831134.1	6965133;6965438;6966003;6966240;6966456	6965359;6965916;6966092;6966311;6967735	+;+;+;+;+	2148	6	0	0	0	0	28	12	0	3	8	0	24	8	2	30	16	30	12	4	0	6	14	6	6	49	1	7	13	4	0
ENSONIG00000009960	GL831134.1;GL831134.1;GL831134.1	6973290;6974769;6975205	6973819;6974863;6975743	-;-;-	1164	42	86	62	92	49	76	33	40	131	51	61	53	89	103	123	39	89	91	24	55	71	51	93	69	88	53	53	25	45	29
ENSONIG00000009961	GL831134.1;GL831134.1;GL831134.1;GL831134.1;GL831134.1;GL831134.1;GL831134.1;GL831134.1;GL831134.1;GL831134.1;GL831134.1;GL831134.1;GL831134.1;GL831134.1;GL831134.1;GL831134.1;GL831134.1;GL831134.1;GL831134.1;GL831134.1;GL831134.1;GL831134.1;GL831134.1;GL831134.1;GL831134.1;GL831134.1;GL831134.1;GL831134.1;GL831134.1;GL831134.1;GL831134.1;GL831134.1;GL831134.1;GL831134.1;GL831134.1;GL831134.1;GL8…	6990385;6990568;6992510;6992510;6994336;6994336;6994712;6994712;6995090;6995090;6995463;6995463;6996797;6996797;6997254;6997254;6997704;6997704;6998081;6998122;6998441;6998441;6998913;6998913;6999213;6999213;6999467;6999467;7001007;7001010;7001167;7001254;7001263;7003022;7003022;7003428;7003428;7003642;7003642	6990798;6990798;6992630;6992630;6994575;6994575;6994887;6994887;6995290;6995290;6995595;6995595;6996915;6996915;6997366;6997366;6997941;6997943;6998306;6998306;6998799;6998799;6999071;6999071;6999368;6999368;6999689;6999689;7001100;7001100;7001169;7001359;7001359;7003231;7003231;7003531;7003531;7003798;7003798	+;+;+;+;+;+;+;+;+;+;+;+;+;+;+;+;+;+;+;+;+;+;+;+;+;+;+;+;+;+;+;+;+;+;+;+;+;+;+	3554	783	1151	442	744	672	1013	638	924	719	731	558	686	942	1038	611	673	915	508	487	480	532	661	731	838	372	597	421	565	328	705
ENSONIG00000009967	GL831134.1;GL831134.1;GL831134.1;GL831134.1;GL831134.1;GL831134.1;GL831134.1	7009996;7011598;7011758;7012497;7012855;7013155;7014086	7010091;7011657;7011940;7012588;7012956;7013403;7014170	-;-;-;-;-;-;-	867	23	28	6	2	26	8	6	33	15	19	16	13	14	22	21	4	31	6	9	14	21	2	14	12	17	12	11	6	6	11
ENSONIG00000009969	GL831134.1;GL831134.1;GL831134.1;GL831134.1;GL831134.1;GL831134.1;GL831134.1;GL831134.1;GL831134.1;GL831134.1	7013874;7015137;7015160;7015335;7015705;7015705;7015859;7015859;7018112;7018112	7014773;7015292;7015608;7015608;7015775;7015775;7015974;7015974;7018514;7018514	+;+;+;+;+;+;+;+;+;+	1962	149	243	107	113	169	206	145	176	152	136	195	123	221	262	271	138	171	126	137	138	189	199	188	158	354	163	117	137	69	164
ENSONIG00000009971	GL831134.1;GL831134.1;GL831134.1;GL831134.1;GL831134.1;GL831134.1;GL831134.1;GL831134.1;GL831134.1	7020433;7020786;7021506;7021688;7022078;7022306;7023588;7023854;7024051	7020532;7020883;7021607;7021758;7022227;7022401;7023697;7023939;7024233	-;-;-;-;-;-;-;-;-	996	130	299	150	203	158	214	140	221	201	161	234	109	231	223	280	108	225	131	156	173	157	167	160	191	287	151	93	162	75	133
ENSONIG00000009975	GL831134.1;GL831134.1;GL831134.1;GL831134.1;GL831134.1;GL831134.1;GL831134.1;GL831134.1;GL831134.1;GL831134.1;GL831134.1;GL831134.1	7044902;7044905;7046527;7048519;7049387;7049402;7053709;7053709;7062422;7062422;7063595;7063595	7045100;7045100;7046574;7048530;7049497;7049497;7053812;7053812;7062620;7062620;7066719;7063710	+;+;+;+;+;+;+;+;+;+;+;+	3798	1865	516	224	604	1776	2840	2471	363	2049	3822	600	2135	1729	2346	4133	2956	1978	1496	1641	1759	1599	1744	2019	1822	3976	396	324	1597	968	308
ENSONIG00000009977	GL831134.1;GL831134.1;GL831134.1;GL831134.1;GL831134.1;GL831134.1;GL831134.1;GL831134.1;GL831134.1;GL831134.1;GL831134.1;GL831134.1;GL831134.1;GL831134.1;GL831134.1;GL831134.1;GL831134.1;GL831134.1;GL831134.1;GL831134.1;GL831134.1;GL831134.1;GL831134.1;GL831134.1;GL831134.1;GL831134.1;GL831134.1;GL831134.1;GL831134.1;GL831134.1;GL831134.1;GL831134.1;GL831134.1;GL831134.1;GL831134.1;GL831134.1;GL8…	7076744;7077092;7077363;7077583;7077880;7078881;7079041;7079234;7079239;7079445;7079445;7079688;7079693;7080007;7080007;7080243;7080293;7080293;7080859;7080859;7081093;7081105;7081377;7081377;7081541;7081541;7081800;7081800;7085669;7085669;7085853;7085853;7086114;7086114;7086447;7086447;7086717;7086717;7087352;7087352;7087580;7087589;7088205;7088205;7088432;7088432;7088678;7088687;7088862;7088862…	7076822;7077264;7077477;7077760;7078096;7078909;7079136;7079364;7079319;7079519;7079520;7079765;7079765;7080137;7080137;7080266;7080475;7080475;7080906;7080897;7081203;7081203;7081457;7081457;7081667;7081667;7081939;7081939;7085767;7085767;7085951;7085954;7086245;7086245;7086536;7086536;7086881;7086881;7087462;7087462;7087730;7087730;7088299;7088299;7088539;7088539;7088776;7088776;7089033;7089033…	-;-;-;-;-;-;-;-;-;-;-;-;-;-;-;-;-;-;-;-;-;-;-;-;-;-;-;-;-;-;-;-;-;-;-;-;-;-;-;-;-;-;-;-;-;-;-;-;-;-;-;-;-;-;-;-;-;-;-;-;-;-;-;-;-;-;-;-;-;-;-;-;-;-;-;-;-;-;-;-;-;-;-;-;-;-;-;-;-;-;-;-;-;-;-;-;-;-;-	5335	0	0	1	3	3	0	4	8	0	0	0	0	2	0	0	7	0	0	0	2	4	5	0	7	0	0	0	0	0	4
ENSONIG00000026661	GL831134.1;GL831134.1;GL831134.1;GL831134.1	7100835;7101204;7101814;7106736	7101009;7101290;7101856;7106868	+;+;+;+	438	0	0	0	0	0	0	0	0	0	0	0	0	0	0	0	0	0	0	0	0	0	0	0	0	0	0	0	0	0	0
ENSONIG00000009990	GL831134.1;GL831134.1;GL831134.1;GL831134.1;GL831134.1;GL831134.1;GL831134.1;GL831134.1;GL831134.1;GL831134.1;GL831134.1;GL831134.1;GL831134.1;GL831134.1;GL831134.1;GL831134.1;GL831134.1;GL831134.1;GL831134.1;GL831134.1;GL831134.1;GL831134.1;GL831134.1;GL831134.1;GL831134.1;GL831134.1;GL831134.1;GL831134.1;GL831134.1;GL831134.1;GL831134.1;GL831134.1;GL831134.1;GL831134.1;GL831134.1;GL831134.1;GL8…	7108684;7109419;7109944;7110127;7110319;7110475;7110616;7111708;7111990;7112294;7112418;7112789;7116944;7117911;7118268;7118703;7119007;7119241;7119485;7119732;7120032;7120290;7120541;7120918;7121833;7122232;7123271;7123508;7126106;7126222;7126404;7127017;7128007;7128564;7128934;7129223;7129554;7129903;7130175;7130413;7131657;7131951;7132302;7132675	7108734;7109535;7110009;7110162;7110381;7110510;7110657;7111791;7112046;7112338;7112471;7112845;7117001;7118009;7118420;7118819;7119158;7119313;7119591;7119915;7120089;7120408;7120768;7121097;7122000;7122384;7123372;7123686;7126169;7126239;7126478;7127025;7128114;7128671;7129005;7129351;7129661;7130085;7130282;7130550;7131773;7132148;7132585;7136073	+;+;+;+;+;+;+;+;+;+;+;+;+;+;+;+;+;+;+;+;+;+;+;+;+;+;+;+;+;+;+;+;+;+;+;+;+;+;+;+;+;+;+;+	7956	417	669	188	302	337	462	178	350	446	364	532	173	395	480	299	309	387	378	325	353	232	397	334	203	474	268	418	328	130	383
ENSONIG00000009999	GL831134.1;GL831134.1;GL831134.1;GL831134.1;GL831134.1;GL831134.1;GL831134.1;GL831134.1;GL831134.1	7162032;7171229;7186301;7199153;7200380;7201044;7225461;7238845;7256654	7162259;7171390;7187004;7199316;7200436;7201160;7225581;7238986;7259881	+;+;+;+;+;+;+;+;+	4923	290	336	263	283	203	372	325	457	246	213	159	316	321	182	630	202	370	292	213	165	299	321	518	220	254	181	205	230	91	234
ENSONIG00000010001	GL831134.1;GL831134.1;GL831134.1;GL831134.1;GL831134.1;GL831134.1;GL831134.1;GL831134.1;GL831134.1	7306872;7318402;7319169;7323948;7324287;7325925;7326387;7327724;7328495	7307058;7318629;7319332;7324113;7324417;7326050;7326520;7327899;7328688	+;+;+;+;+;+;+;+;+	1506	270	442	198	265	351	409	239	374	225	290	364	183	323	403	392	323	303	220	220	191	288	266	472	251	498	234	213	226	173	290
ENSONIG00000010010	GL831134.1;GL831134.1;GL831134.1;GL831134.1;GL831134.1;GL831134.1;GL831134.1;GL831134.1;GL831134.1;GL831134.1;GL831134.1;GL831134.1;GL831134.1;GL831134.1;GL831134.1;GL831134.1;GL831134.1;GL831134.1;GL831134.1;GL831134.1;GL831134.1;GL831134.1;GL831134.1;GL831134.1;GL831134.1;GL831134.1;GL831134.1;GL831134.1;GL831134.1;GL831134.1;GL831134.1;GL831134.1	7347041;7396528;7414460;7415355;7415532;7415532;7442223;7442223;7448831;7448831;7462540;7462540;7471087;7471087;7473677;7473677;7474794;7474794;7479909;7479975;7481152;7481158;7482638;7482638;7493793;7493793;7495884;7495884;7496901;7496901;7497935;7497935	7347382;7396592;7414564;7415372;7416213;7416213;7442378;7442378;7449166;7449166;7462664;7462664;7471249;7471249;7473785;7473785;7474858;7474858;7480097;7480097;7481405;7481405;7482853;7482853;7493942;7493942;7496077;7496077;7497056;7497056;7498037;7498043	+;+;+;+;+;+;+;+;+;+;+;+;+;+;+;+;+;+;+;+;+;+;+;+;+;+;+;+;+;+;+;+	3434	1099	1666	946	1285	1214	2036	942	1216	1307	1484	1626	929	1559	1522	1471	1178	1497	1151	873	1001	1037	1314	1592	1500	881	1224	1277	1119	627	981
ENSONIG00000025668	GL831134.1;GL831134.1	7511525;7515081	7511815;7515132	-;-	343	0	0	0	0	0	0	0	1	0	0	0	0	0	0	0	0	0	0	0	0	0	0	2	0	0	0	0	0	0	1
ENSONIG00000010024	GL831134.1;GL831134.1;GL831134.1;GL831134.1;GL831134.1;GL831134.1;GL831134.1;GL831134.1;GL831134.1;GL831134.1;GL831134.1;GL831134.1;GL831134.1;GL831134.1;GL831134.1;GL831134.1;GL831134.1;GL831134.1;GL831134.1;GL831134.1;GL831134.1;GL831134.1;GL831134.1;GL831134.1;GL831134.1	7658413;7658850;7659361;7660437;7661228;7661912;7662198;7662987;7664142;7664520;7664901;7665144;7665512;7665753;7666020;7670628;7671044;7671218;7671892;7672366;7672653;7672886;7673180;7674166;7674425	7658655;7658867;7659384;7660680;7661780;7662108;7662581;7663279;7664407;7664579;7665038;7665400;7665605;7665824;7666154;7670884;7671128;7671316;7672035;7672574;7672809;7673107;7673253;7674295;7674540	+;+;+;+;+;+;+;+;+;+;+;+;+;+;+;+;+;+;+;+;+;+;+;+;+	4471	0	0	0	0	0	0	0	3	0	0	0	0	0	0	8	0	0	0	0	0	0	0	0	0	1	0	1	0	0	2
ENSONIG00000010028	GL831134.1;GL831134.1;GL831134.1;GL831134.1;GL831134.1;GL831134.1;GL831134.1;GL831134.1;GL831134.1	7713090;7715257;7719405;7719759;7720478;7729420;7729803;7730380;7731155	7714217;7715517;7719628;7719924;7720677;7729563;7729932;7730615;7731753	-;-;-;-;-;-;-;-;-	3088	0	0	2	2	0	2	2	0	13	0	6	0	13	2	39	0	0	1	2	8	1	0	4	7	0	8	0	6	4	0
ENSONIG00000010031	GL831134.1;GL831134.1;GL831134.1;GL831134.1;GL831134.1;GL831134.1;GL831134.1;GL831134.1;GL831134.1;GL831134.1;GL831134.1;GL831134.1;GL831134.1;GL831134.1;GL831134.1;GL831134.1;GL831134.1;GL831134.1;GL831134.1;GL831134.1;GL831134.1;GL831134.1;GL831134.1;GL831134.1;GL831134.1;GL831134.1;GL831134.1;GL831134.1;GL831134.1;GL831134.1	7742016;7744850;7745071;7745205;7746163;7746163;7747075;7747075;7747360;7747360;7748335;7748341;7748692;7748692;7748941;7748941;7749124;7749124;7749735;7749735;7750030;7750030;7750193;7750193;7750470;7750470;7750686;7750686;7751020;7751020	7742247;7744886;7745557;7745557;7746340;7746340;7747184;7747184;7747498;7747498;7748485;7748485;7748815;7748815;7749012;7749012;7749263;7749263;7749907;7749907;7750104;7750104;7750384;7750384;7750584;7750584;7750843;7750843;7751177;7755065	+;+;+;+;+;+;+;+;+;+;+;+;+;+;+;+;+;+;+;+;+;+;+;+;+;+;+;+;+;+	6429	1239	2417	1034	1831	1699	2363	1109	1745	1774	1783	2555	1194	2011	2061	1647	1470	1994	1566	1260	1244	1398	1730	1885	1660	1426	1625	1851	1104	895	1303
ENSONIG00000021434	GL831134.1	7764540	7766339	+	1800	16410	30461	11148	23733	24691	42864	18101	25562	23409	20364	27259	15519	23809	24920	31110	22677	29316	23520	17472	19547	17017	21010	25099	23378	39862	23372	22370	19394	11601	16710
ENSONIG00000010036	GL831134.1;GL831134.1;GL831134.1;GL831134.1	7768102;7769525;7769821;7770022	7768137;7769662;7769929;7770200	-;-;-;-	462	8	13	28	26	3	14	15	11	16	19	8	20	18	18	24	14	12	22	3	7	7	10	15	9	6	6	8	13	10	19
ENSONIG00000010038	GL831134.1;GL831134.1;GL831134.1;GL831134.1;GL831134.1;GL831134.1;GL831134.1;GL831134.1;GL831134.1;GL831134.1	7772217;7772720;7772933;7773105;7773319;7773474;7773678;7773941;7774151;7774405	7772272;7772853;7773015;7773200;7773400;7773535;7773782;7774031;7774288;7774556	+;+;+;+;+;+;+;+;+;+	999	233	387	220	484	334	315	229	354	333	263	277	334	384	451	655	284	390	252	172	196	300	295	357	348	469	209	174	292	181	265
ENSONIG00000010041	GL831134.1;GL831134.1;GL831134.1;GL831134.1;GL831134.1;GL831134.1;GL831134.1;GL831134.1;GL831134.1;GL831134.1;GL831134.1;GL831134.1;GL831134.1;GL831134.1;GL831134.1;GL831134.1	7775758;7775998;7776555;7777832;7778104;7778295;7779196;7779457;7779739;7780047;7780317;7780635;7780883;7781721;7781957;7783714	7775889;7776143;7776741;7777966;7778200;7778419;7779303;7779627;7779915;7780192;7780545;7780749;7781043;7781834;7782154;7784162	-;-;-;-;-;-;-;-;-;-;-;-;-;-;-;-	2690	1248	1967	881	1209	1324	1776	1121	1612	996	1336	1447	818	1293	1494	1830	1319	1339	1239	1058	1212	1190	1274	1293	1165	1847	1274	1179	1013	727	1189
ENSONIG00000010043	GL831134.1;GL831134.1;GL831134.1;GL831134.1;GL831134.1;GL831134.1;GL831134.1;GL831134.1;GL831134.1;GL831134.1;GL831134.1;GL831134.1;GL831134.1;GL831134.1;GL831134.1;GL831134.1;GL831134.1;GL831134.1;GL831134.1;GL831134.1	7815630;7816485;7832338;7832338;7832725;7832725;7834406;7834406;7835638;7836930;7836930;7837966;7837966;7838686;7838692;7839164;7839184;7839968;7839968;7840219	7816658;7816658;7832508;7832508;7832943;7832943;7834645;7834645;7835691;7837083;7837083;7838001;7838001;7838781;7838783;7839210;7839210;7840024;7840039;7843906	+;+;+;+;+;+;+;+;+;+;+;+;+;+;+;+;+;+;+;+	5808	6327	9764	5031	7564	6726	9737	4894	6923	7979	7547	5470	4402	6982	8641	7491	4975	8261	5598	5772	4902	5685	6882	7883	6662	6187	5212	5668	5154	2922	5481
ENSONIG00000010048	GL831134.1;GL831134.1;GL831134.1	7864531;7865123;7865374	7864997;7865245;7865615	-;-;-	832	0	4	0	0	0	0	0	8	1	0	0	0	1	0	0	5	2	0	3	0	0	0	1	0	0	0	2	6	0	0
ENSONIG00000010049	GL831134.1;GL831134.1;GL831134.1;GL831134.1	7876235;7876647;7876874;7877078	7876515;7876817;7877017;7877138	-;-;-;-	657	0	0	0	0	0	0	0	0	0	0	0	0	0	0	0	0	0	0	0	0	0	0	0	0	0	0	0	0	0	0
ENSONIG00000010051	GL831134.1;GL831134.1;GL831134.1;GL831134.1;GL831134.1;GL831134.1;GL831134.1;GL831134.1;GL831134.1;GL831134.1;GL831134.1;GL831134.1;GL831134.1;GL831134.1;GL831134.1	7912978;7914002;7926244;7931649;7932596;7933146;7935371;7937483;7940617;7944688;7946075;7946274;7946801;7947042;7947223	7913255;7914522;7926287;7931686;7932675;7933190;7935415;7937526;7940703;7944773;7946195;7946368;7946921;7947130;7947312	+;+;+;+;+;+;+;+;+;+;+;+;+;+;+	1784	981	1528	841	1064	1469	2031	1109	1649	1206	1225	1398	782	1248	1273	1264	1135	1329	1078	882	1079	985	1185	1366	1148	1646	1141	1035	1036	575	936
ENSONIG00000010057	GL831134.1;GL831134.1;GL831134.1;GL831134.1;GL831134.1;GL831134.1;GL831134.1;GL831134.1;GL831134.1;GL831134.1;GL831134.1;GL831134.1;GL831134.1;GL831134.1;GL831134.1;GL831134.1;GL831134.1;GL831134.1;GL831134.1;GL831134.1;GL831134.1;GL831134.1;GL831134.1;GL831134.1	7948920;7949642;7950057;7950394;7950689;7950904;7951216;7951896;7952153;7952375;7953738;7954060;7954285;7954373;7954562;7954688;7955340;7955611;7955892;7956127;7956371;7956859;7957095;7957552	7949499;7949878;7950280;7950564;7950823;7951038;7951303;7952068;7952282;7952552;7953970;7954166;7954349;7954467;7954655;7955253;7955511;7955782;7956017;7956261;7956570;7956992;7957244;7958574	+;+;+;+;+;+;+;+;+;+;+;+;+;+;+;+;+;+;+;+;+;+;+;+	5323	57	113	55	84	61	156	55	78	46	116	96	69	103	51	108	119	66	71	95	78	43	72	75	69	59	63	55	57	48	88
ENSONIG00000010063	GL831134.1;GL831134.1;GL831134.1;GL831134.1	7959045;7959550;7960060;7961159	7959290;7959961;7960244;7966253	+;+;+;+	5938	428	383	252	340	454	607	383	529	374	423	451	284	331	464	651	448	306	380	228	322	289	331	450	330	592	346	327	303	167	322
ENSONIG00000010064	GL831134.1;GL831134.1;GL831134.1;GL831134.1;GL831134.1;GL831134.1;GL831134.1;GL831134.1	7966512;7968619;7968832;7971105;7973981;7979628;7981094;7981403	7967167;7968738;7969676;7971289;7974099;7979816;7981282;7984683	+;+;+;+;+;+;+;+	5584	413	509	324	489	317	658	324	607	347	423	526	304	460	576	552	397	494	407	264	347	328	300	580	374	330	351	242	306	227	281
ENSONIG00000010066	GL831134.1;GL831134.1;GL831134.1;GL831134.1;GL831134.1;GL831134.1;GL831134.1;GL831134.1;GL831134.1;GL831134.1;GL831134.1;GL831134.1;GL831134.1;GL831134.1;GL831134.1;GL831134.1;GL831134.1;GL831134.1;GL831134.1;GL831134.1;GL831134.1;GL831134.1;GL831134.1;GL831134.1;GL831134.1;GL831134.1;GL831134.1;GL831134.1;GL831134.1;GL831134.1;GL831134.1;GL831134.1;GL831134.1;GL831134.1;GL831134.1;GL831134.1;GL8…	7987026;7987919;7987925;7988146;7988146;7988373;7988373;7989436;7989436;7989750;7989750;7991823;7991823;7993300;7993300;7995165;7995165;7995296;7995296;7995686;7995686;7996566;7996566;7997671;7997671;7998140;7998191;7998285;7998495;7998521;7998582;7998726;7998854;7998854;7999606;7999618;8000388;8000777;8000782;8002082;8002082;8004915;8004915;8007059;8007236;8007528;8007528;8007779;8008085;8008085…	7987523;7988024;7988024;7988243;7988243;7988465;7988465;7989669;7989669;7989862;7989862;7991984;7991984;7993411;7993411;7995209;7995209;7995464;7995464;7995928;7995928;7996733;7996733;7997762;7997762;7998179;7998221;7998298;7998554;7998709;7998709;7998752;7999079;7999079;7999776;7999776;8000413;8000904;8000904;8002228;8002228;8005094;8005094;8007431;8007431;8007657;8007662;8007791;8008219;8008219…	+;+;+;+;+;+;+;+;+;+;+;+;+;+;+;+;+;+;+;+;+;+;+;+;+;+;+;+;+;+;+;+;+;+;+;+;+;+;+;+;+;+;+;+;+;+;+;+;+;+;+;+;+;+;+;+;+;+;+;+;+;+;+;+;+;+	6535	464	873	324	405	489	670	355	503	396	637	521	390	551	478	731	580	490	449	347	313	432	569	771	528	397	332	424	498	227	458
ENSONIG00000010069	GL831134.1;GL831134.1;GL831134.1;GL831134.1;GL831134.1;GL831134.1;GL831134.1;GL831134.1;GL831134.1	8015481;8016742;8019877;8020461;8020547;8021117;8021284;8021406;8021705	8016139;8016778;8019907;8020644;8020644;8021173;8021834;8021580;8021834	-;-;-;-;-;-;-;-;-	1519	737	1061	470	886	978	1637	769	1006	931	875	1169	716	934	1161	1676	1056	1149	885	607	726	905	950	1322	883	1311	992	839	700	476	701
ENSONIG00000010071	GL831134.1;GL831134.1;GL831134.1;GL831134.1	8027248;8028687;8074872;8126849	8027623;8028851;8075155;8128775	+;+;+;+	2752	38	21	10	19	33	44	23	43	33	31	9	16	56	69	47	12	34	22	5	18	16	56	23	31	55	12	3	8	23	15
ENSONIG00000010073	GL831134.1;GL831134.1	8139862;8140509	8139932;8140677	-;-	240	1555	2496	1053	2339	2470	4000	1691	2727	1998	1930	2203	1614	1971	2353	3353	2184	2664	2195	1534	1782	1952	2090	2392	1999	3198	2175	1747	1631	930	1452
ENSONIG00000022233	GL831134.1	8142318	8142438	-	121	0	1	0	0	0	0	0	0	0	0	0	0	0	0	0	1	0	0	0	0	0	0	0	1	0	0	0	0	2	0
ENSONIG00000010074	GL831134.1;GL831134.1;GL831134.1;GL831134.1;GL831134.1	8159919;8160509;8160837;8161083;8162027	8160395;8160740;8160957;8161170;8162143	-;-;-;-;-	1035	154	337	143	183	154	323	120	210	222	235	199	179	210	230	294	201	223	170	122	135	141	227	216	203	295	261	146	184	58	158
ENSONIG00000010075	GL831134.1;GL831134.1;GL831134.1;GL831134.1;GL831134.1;GL831134.1;GL831134.1;GL831134.1;GL831134.1	8163646;8164281;8164465;8164963;8165295;8165530;8166193;8166751;8166983	8163823;8164380;8164612;8165123;8165415;8165735;8166277;8166893;8167136	+;+;+;+;+;+;+;+;+	1296	171	391	105	205	254	313	125	273	183	218	227	132	201	207	249	236	249	168	141	132	159	197	162	210	238	180	132	112	86	142
ENSONIG00000010076	GL831134.1;GL831134.1;GL831134.1;GL831134.1;GL831134.1;GL831134.1;GL831134.1;GL831134.1;GL831134.1;GL831134.1;GL831134.1;GL831134.1;GL831134.1;GL831134.1;GL831134.1;GL831134.1;GL831134.1;GL831134.1;GL831134.1;GL831134.1;GL831134.1;GL831134.1;GL831134.1;GL831134.1;GL831134.1;GL831134.1;GL831134.1	8168359;8168925;8169410;8171049;8171283;8171548;8171658;8172249;8172483;8172613;8173202;8173366;8173476;8173984;8174832;8175390;8176346;8177180;8177401;8177670;8177889;8178269;8178525;8179379;8179511;8180825;8182485	8168660;8169120;8169533;8171157;8171298;8171579;8171786;8172383;8172564;8172824;8173306;8173397;8173724;8174120;8175017;8175504;8176548;8177290;8177577;8177794;8178020;8178426;8178742;8179394;8179670;8180992;8182685	-;-;-;-;-;-;-;-;-;-;-;-;-;-;-;-;-;-;-;-;-;-;-;-;-;-;-	3830	0	7	23	16	13	19	6	10	21	5	11	0	3	10	3	1	31	15	5	8	12	10	1	6	2	3	7	0	5	15
ENSONIG00000010078	GL831134.1;GL831134.1;GL831134.1;GL831134.1;GL831134.1;GL831134.1;GL831134.1;GL831134.1;GL831134.1;GL831134.1;GL831134.1;GL831134.1;GL831134.1;GL831134.1;GL831134.1	8190814;8192158;8192289;8192368;8192786;8193078;8193271;8193533;8193778;8194102;8194395;8195286;8195675;8195793;8195970	8190913;8192245;8192316;8192404;8192975;8193186;8193427;8193675;8193937;8194290;8194462;8195433;8195698;8195899;8196698	+;+;+;+;+;+;+;+;+;+;+;+;+;+;+	2277	7	69	29	32	20	32	7	27	19	27	12	2	14	13	51	9	37	34	34	19	21	19	53	37	32	30	36	40	17	26
ENSONIG00000010081	GL831134.1;GL831134.1;GL831134.1;GL831134.1;GL831134.1;GL831134.1;GL831134.1;GL831134.1;GL831134.1;GL831134.1;GL831134.1;GL831134.1;GL831134.1;GL831134.1;GL831134.1;GL831134.1;GL831134.1;GL831134.1;GL831134.1;GL831134.1;GL831134.1;GL831134.1;GL831134.1	8197542;8198883;8198929;8199341;8199341;8199484;8199484;8200435;8200435;8201111;8201111;8201334;8201334;8203052;8203052;8203242;8203242;8203462;8203462;8203614;8203854;8203854;8204095	8197787;8199065;8199065;8199385;8199385;8199608;8199608;8200590;8200590;8201208;8201208;8201534;8201534;8203166;8203166;8203356;8203356;8203568;8203723;8203723;8203987;8204686;8204265	+;+;+;+;+;+;+;+;+;+;+;+;+;+;+;+;+;+;+;+;+;+;+	2379	0	0	6	13	6	0	0	0	9	12	0	2	0	6	27	0	6	0	0	0	0	0	0	0	0	0	0	2	4	4
ENSONIG00000010083	GL831134.1;GL831134.1;GL831134.1;GL831134.1;GL831134.1;GL831134.1;GL831134.1;GL831134.1;GL831134.1;GL831134.1;GL831134.1;GL831134.1;GL831134.1	8206181;8206203;8206606;8206606;8206777;8206777;8208548;8208548;8208752;8208752;8210299;8210299;8211782	8206517;8206517;8206683;8206683;8206969;8206969;8208659;8208659;8208851;8208851;8210417;8210357;8211808	+;+;+;+;+;+;+;+;+;+;+;+;+	966	125	140	102	216	148	226	105	155	182	221	141	111	166	206	263	175	134	115	101	100	136	164	174	214	206	102	93	118	88	159
ENSONIG00000010085	GL831134.1;GL831134.1;GL831134.1;GL831134.1;GL831134.1;GL831134.1;GL831134.1	8213136;8214354;8214587;8214824;8215069;8215530;8216469	8213184;8214490;8214739;8214928;8215203;8215641;8216488	-;-;-;-;-;-;-	711	468	615	377	523	499	684	420	572	504	484	582	363	542	598	735	547	548	484	339	418	447	450	581	485	406	460	413	377	236	404
ENSONIG00000010089	GL831134.1;GL831134.1;GL831134.1;GL831134.1;GL831134.1;GL831134.1;GL831134.1;GL831134.1;GL831134.1;GL831134.1;GL831134.1;GL831134.1	8217803;8218374;8218506;8218883;8219222;8219500;8219849;8220963;8221182;8221512;8221835;8222271	8217832;8218419;8218699;8219138;8219424;8219756;8220015;8221104;8221411;8221708;8221966;8222441	-;-;-;-;-;-;-;-;-;-;-;-	2025	505	1033	438	811	643	1046	526	817	600	616	657	388	744	709	761	603	736	638	550	713	539	637	638	612	534	721	536	482	324	522
ENSONIG00000025471	GL831134.1;GL831134.1;GL831134.1;GL831134.1;GL831134.1;GL831134.1;GL831134.1	8246437;8246739;8246881;8247098;8247297;8247498;8247629	8246614;8246778;8246958;8247187;8247377;8247535;8248263	+;+;+;+;+;+;+	1140	0	0	0	0	0	0	0	0	0	0	0	0	0	0	0	0	0	0	0	0	0	0	0	0	0	0	0	0	0	0
ENSONIG00000021669	GL831134.1	8255913	8256000	-	88	1	13	3	2	11	10	5	12	8	2	8	3	6	8	4	4	4	3	5	2	3	6	3	9	0	7	1	1	2	1
ENSONIG00000022093	GL831134.1	8256152	8256238	-	87	0	0	0	1	3	2	0	1	0	0	0	0	1	1	3	0	0	2	0	1	1	0	0	2	1	0	0	0	0	0
ENSONIG00000010091	GL831134.1;GL831134.1	8279534;8280479	8280424;8281204	+;+	1617	46	43	15	31	49	72	8	59	24	40	44	33	44	43	27	55	34	32	27	33	51	37	33	41	37	33	32	44	12	31
ENSONIG00000010092	GL831134.1;GL831134.1;GL831134.1;GL831134.1;GL831134.1;GL831134.1;GL831134.1;GL831134.1;GL831134.1;GL831134.1;GL831134.1;GL831134.1;GL831134.1;GL831134.1;GL831134.1;GL831134.1;GL831134.1;GL831134.1;GL831134.1;GL831134.1;GL831134.1;GL831134.1;GL831134.1;GL831134.1;GL831134.1;GL831134.1;GL831134.1;GL831134.1;GL831134.1;GL831134.1;GL831134.1;GL831134.1;GL831134.1;GL831134.1;GL831134.1;GL831134.1;GL8…	8283794;8283794;8290217;8290217;8296786;8296786;8300099;8300099;8303888;8304864;8304864;8305978;8305978;8307616;8307616;8307788;8307792;8308153;8308336;8308451;8308701;8308701;8308936;8308963;8309347;8309522;8309522;8310014;8310376;8310376;8310558;8310558;8310825;8310915;8310953;8311008;8311272;8311272;8312588;8312588;8312813;8312813;8313115;8313130;8314234;8314234;8314457;8314457;8314682;8314682	8284513;8284513;8290476;8290476;8296965;8296965;8300185;8300185;8303920;8305002;8305002;8306117;8306117;8307706;8307744;8307893;8307930;8308181;8308381;8308452;8308812;8308812;8309217;8309217;8309385;8309947;8310228;8310237;8310482;8310482;8310789;8310774;8310861;8310952;8311120;8311177;8311965;8311965;8312724;8312724;8313027;8313027;8313211;8313211;8314349;8314349;8314575;8314575;8314966;8314978	+;+;+;+;+;+;+;+;+;+;+;+;+;+;+;+;+;+;+;+;+;+;+;+;+;+;+;+;+;+;+;+;+;+;+;+;+;+;+;+;+;+;+;+;+;+;+;+;+;+	5371	1177	2492	835	1618	1278	2025	1008	1370	1240	1555	1437	983	1503	1978	1950	1425	1620	1096	950	839	1322	1613	1736	1722	1375	1103	1439	1042	750	1193
ENSONIG00000010099	GL831134.1;GL831134.1;GL831134.1;GL831134.1;GL831134.1;GL831134.1;GL831134.1;GL831134.1;GL831134.1;GL831134.1;GL831134.1;GL831134.1;GL831134.1;GL831134.1;GL831134.1;GL831134.1;GL831134.1;GL831134.1;GL831134.1;GL831134.1;GL831134.1;GL831134.1;GL831134.1;GL831134.1;GL831134.1;GL831134.1;GL831134.1;GL831134.1;GL831134.1;GL831134.1;GL831134.1;GL831134.1;GL831134.1;GL831134.1;GL831134.1	8318663;8320184;8320196;8320719;8320719;8320959;8320959;8322468;8322468;8322709;8322709;8322972;8322972;8323621;8323621;8325458;8325458;8327222;8327222;8327559;8327559;8327985;8328063;8328063;8328649;8328649;8328908;8328908;8329180;8329180;8329479;8329479;8330790;8330790;8331527	8319062;8320353;8320353;8320802;8320802;8321043;8321043;8322599;8322599;8322885;8322885;8323483;8323483;8323738;8323738;8325639;8325639;8327467;8327467;8327613;8327622;8327999;8328220;8328220;8328818;8328818;8329078;8329078;8329311;8329311;8329697;8329697;8330900;8330932;8331555	+;+;+;+;+;+;+;+;+;+;+;+;+;+;+;+;+;+;+;+;+;+;+;+;+;+;+;+;+;+;+;+;+;+;+	3207	1940	3217	1443	2208	2389	3766	1725	2534	2224	2372	2093	1360	1950	2311	2802	2132	2454	2292	1730	1836	1631	2051	2260	2002	1996	2441	1814	1841	1225	1719
ENSONIG00000010101	GL831134.1;GL831134.1;GL831134.1;GL831134.1;GL831134.1;GL831134.1;GL831134.1;GL831134.1;GL831134.1;GL831134.1;GL831134.1;GL831134.1;GL831134.1;GL831134.1;GL831134.1;GL831134.1;GL831134.1;GL831134.1;GL831134.1;GL831134.1;GL831134.1;GL831134.1;GL831134.1;GL831134.1;GL831134.1;GL831134.1;GL831134.1;GL831134.1;GL831134.1;GL831134.1	8332367;8333435;8333938;8333938;8334125;8334169;8334216;8334492;8334492;8334797;8334803;8334966;8334966;8335251;8335251;8335454;8335454;8335973;8335973;8336218;8336218;8336485;8336485;8336739;8336739;8336963;8336963;8339490;8339490;8342069	8333569;8333569;8334101;8334128;8334128;8334375;8334375;8334683;8334680;8334873;8334873;8335095;8335095;8335359;8335359;8335609;8335609;8336088;8336088;8336341;8336341;8336624;8336624;8336874;8336874;8337184;8337184;8339548;8339838;8342107	-;-;-;-;-;-;-;-;-;-;-;-;-;-;-;-;-;-;-;-;-;-;-;-;-;-;-;-;-;-	3391	342	501	290	420	362	520	295	483	446	314	431	221	398	401	512	260	440	400	270	316	294	374	482	335	466	319	289	280	190	388
ENSONIG00000010110	GL831134.1;GL831134.1;GL831134.1;GL831134.1;GL831134.1;GL831134.1;GL831134.1;GL831134.1;GL831134.1;GL831134.1;GL831134.1;GL831134.1;GL831134.1;GL831134.1;GL831134.1;GL831134.1;GL831134.1;GL831134.1;GL831134.1;GL831134.1;GL831134.1;GL831134.1;GL831134.1;GL831134.1;GL831134.1;GL831134.1	8363478;8364135;8365276;8365551;8365936;8366146;8366204;8367584;8370689;8373755;8383245;8390226;8392556;8392615;8393373;8393900;8394035;8394538;8394956;8395349;8395884;8396442;8396533;8397003;8398331;8399091	8363818;8364440;8365293;8365865;8365969;8366172;8366562;8367598;8370737;8373782;8383279;8390247;8392584;8392670;8393416;8393908;8394057;8394838;8394977;8395657;8396192;8396512;8396560;8397311;8398645;8399370	-;-;-;-;-;-;-;-;-;-;-;-;-;-;-;-;-;-;-;-;-;-;-;-;-;-	3654	10	1	5	7	8	6	9	3	6	10	12	4	8	7	7	5	3	5	0	1	2	6	5	5	17	3	4	1	2	2
ENSONIG00000010116	GL831134.1;GL831134.1;GL831134.1;GL831134.1;GL831134.1;GL831134.1;GL831134.1;GL831134.1;GL831134.1;GL831134.1;GL831134.1;GL831134.1;GL831134.1;GL831134.1;GL831134.1;GL831134.1	8575699;8579862;8580080;8580621;8581308;8584214;8584707;8585284;8585997;8587261;8590892;8595061;8595362;8595782;8596081;8596435	8575783;8579950;8580214;8580764;8581463;8584355;8584879;8585412;8586182;8587511;8591034;8595152;8595494;8595979;8596193;8596488	+;+;+;+;+;+;+;+;+;+;+;+;+;+;+;+	2223	0	2	2	2	5	5	1	0	1	2	5	1	3	2	1	5	5	1	3	4	2	2	5	2	0	3	0	2	0	1
ENSONIG00000023090	GL831134.1;GL831134.1	8641181;8745088	8641492;8745240	-;-	465	0	1	2	1	2	8	0	0	0	2	0	3	2	0	1	3	2	9	0	1	0	3	1	3	0	2	1	1	3	2
ENSONIG00000026055	GL831134.1;GL831134.1	8680453;8680942	8680851;8681095	-;-	553	7	7	0	1	2	6	3	5	0	6	9	1	4	4	7	2	3	1	2	4	6	5	7	1	5	6	1	5	2	0
ENSONIG00000010126	GL831134.1;GL831134.1;GL831134.1;GL831134.1;GL831134.1;GL831134.1;GL831134.1;GL831134.1;GL831134.1;GL831134.1;GL831134.1;GL831134.1;GL831134.1;GL831134.1;GL831134.1;GL831134.1;GL831134.1;GL831134.1;GL831134.1;GL831134.1;GL831134.1;GL831134.1;GL831134.1;GL831134.1;GL831134.1;GL831134.1	8760109;8760784;8760893;8761498;8762430;8762555;8762577;8764105;8764105;8764464;8764464;8765507;8765507;8766330;8766330;8767036;8767036;8767604;8767604;8767992;8767992;8768355;8768355;8769425;8769425;8769669	8760300;8760802;8761150;8761525;8762461;8762837;8762837;8764362;8764362;8764715;8764715;8765761;8765761;8766587;8766587;8767293;8767293;8767858;8767858;8768255;8768255;8768384;8768384;8769456;8769461;8770388	+;+;+;+;+;+;+;+;+;+;+;+;+;+;+;+;+;+;+;+;+;+;+;+;+;+	3399	0	0	0	0	0	0	0	0	0	0	0	6	0	0	2	0	0	0	0	0	0	0	0	0	0	0	0	0	0	0
ENSONIG00000010129	GL831134.1;GL831134.1;GL831134.1;GL831134.1;GL831134.1;GL831134.1	8799516;8803829;8805330;8806401;8806780;8807314	8802394;8804064;8805390;8806552;8806848;8807802	-;-;-;-;-;-	3886	590	1047	281	597	683	931	543	651	666	685	724	455	604	686	786	649	503	555	420	458	575	736	762	833	593	586	635	442	329	559
ENSONIG00000010131	GL831134.1;GL831134.1;GL831134.1;GL831134.1;GL831134.1;GL831134.1;GL831134.1;GL831134.1;GL831134.1;GL831134.1;GL831134.1;GL831134.1;GL831134.1;GL831134.1;GL831134.1;GL831134.1;GL831134.1;GL831134.1;GL831134.1;GL831134.1;GL831134.1;GL831134.1;GL831134.1	8807943;8809097;8809405;8809405;8809956;8809956;8810291;8810291;8810596;8810596;8810858;8810949;8810949;8812281;8812281;8812799;8812799;8813370;8813370;8813655;8813655;8815519;8815519	8809139;8809139;8809468;8809468;8810092;8810092;8810498;8810498;8810693;8810691;8810900;8811052;8811052;8812327;8812327;8812915;8812915;8813399;8813399;8813775;8813775;8815664;8816428	-;-;-;-;-;-;-;-;-;-;-;-;-;-;-;-;-;-;-;-;-;-;-	3076	685	976	457	621	824	927	711	854	724	868	683	409	668	621	799	827	965	660	492	528	562	723	579	679	1143	828	640	494	325	580
ENSONIG00000010134	GL831134.1;GL831134.1;GL831134.1;GL831134.1;GL831134.1;GL831134.1;GL831134.1;GL831134.1;GL831134.1;GL831134.1;GL831134.1;GL831134.1	8814720;8818294;8818722;8818971;8819198;8821633;8821880;8822136;8822707;8823060;8824398;8828815	8815305;8818511;8818848;8819058;8819309;8821791;8822032;8822243;8822874;8823210;8824545;8828833	+;+;+;+;+;+;+;+;+;+;+;+	2037	614	818	331	629	753	922	418	702	616	581	665	430	761	743	816	691	615	548	427	447	578	631	697	585	675	601	384	503	296	446
ENSONIG00000010137	GL831134.1;GL831134.1;GL831134.1;GL831134.1;GL831134.1;GL831134.1;GL831134.1	8828840;8829115;8829426;8829847;8830266;8830530;8830999	8828998;8829272;8829519;8829961;8830399;8830598;8831076	+;+;+;+;+;+;+	807	210	331	175	211	279	300	186	265	199	292	172	130	183	276	304	200	329	227	188	163	218	183	226	159	250	225	168	208	69	197
ENSONIG00000010139	GL831134.1;GL831134.1;GL831134.1;GL831134.1;GL831134.1;GL831134.1;GL831134.1;GL831134.1;GL831134.1;GL831134.1;GL831134.1;GL831134.1;GL831134.1;GL831134.1;GL831134.1;GL831134.1;GL831134.1;GL831134.1;GL831134.1;GL831134.1;GL831134.1;GL831134.1;GL831134.1;GL831134.1;GL831134.1;GL831134.1;GL831134.1;GL831134.1;GL831134.1;GL831134.1;GL831134.1;GL831134.1;GL831134.1;GL831134.1;GL831134.1;GL831134.1;GL8…	8832223;8838672;8838912;8838951;8839375;8839378;8839625;8839625;8839860;8839860;8840291;8840291;8840513;8840528;8841295;8841295;8841503;8841503;8841786;8841786;8841981;8841981;8842251;8842251;8842685;8842687;8842949;8842949;8843135;8843135;8845045;8845045;8845189;8845189;8845427;8845427;8845694;8845694;8845963;8846012;8846012;8846353;8846366;8846603;8846603;8846923;8847080;8847221;8847221;8847486…	8836971;8838726;8838997;8838997;8839513;8839513;8839768;8839768;8840080;8840077;8840392;8840392;8840749;8840749;8841416;8841416;8841692;8841692;8841902;8841902;8842112;8842112;8842465;8842499;8842846;8842866;8843105;8843059;8843388;8843382;8845099;8845099;8845306;8845306;8845544;8845544;8845908;8845908;8845968;8846300;8846271;8846482;8846482;8846859;8846807;8846973;8847144;8847368;8847584;8847584…	-;-;-;-;-;-;-;-;-;-;-;-;-;-;-;-;-;-;-;-;-;-;-;-;-;-;-;-;-;-;-;-;-;-;-;-;-;-;-;-;-;-;-;-;-;-;-;-;-;-;-;-;-;-;-;-;-;-;-;-;-;-;-;-;-;-;-;-;-;-;-;-;-;-;-;-;-;-;-;-;-;-;-;-;-;-;-;-;-;-;-;-;-;-;-;-;-	12377	6324	8892	4097	6760	6580	9053	5218	6918	6408	6855	6852	4315	6342	6888	7285	6339	6618	5527	4968	5612	5042	6543	7085	6107	5430	5442	5880	4447	3104	4869
ENSONIG00000022811	GL831134.1;GL831134.1;GL831134.1;GL831134.1;GL831134.1;GL831134.1	8883674;8883674;8883674;8885330;8887398;8888681	8885220;8886871;8887271;8885522;8887811;8888861	-;-;-;-;-;-	4193	164	742	211	354	350	314	175	529	288	165	498	178	396	276	261	193	371	205	261	307	258	316	383	359	324	376	402	195	149	205
ENSONIG00000010150	GL831134.1;GL831134.1;GL831134.1;GL831134.1;GL831134.1;GL831134.1;GL831134.1;GL831134.1;GL831134.1;GL831134.1	8891027;8891763;8891955;8892160;8892337;8892503;8893603;8893798;8893982;8894212	8891118;8891866;8892052;8892263;8892419;8892627;8893704;8893890;8894101;8894624	+;+;+;+;+;+;+;+;+;+	1334	18	79	16	44	35	31	25	33	42	52	51	38	44	34	49	34	16	17	26	40	20	25	30	38	28	32	4	19	14	41
ENSONIG00000010153	GL831134.1;GL831134.1;GL831134.1;GL831134.1;GL831134.1;GL831134.1;GL831134.1;GL831134.1;GL831134.1;GL831134.1;GL831134.1;GL831134.1;GL831134.1;GL831134.1;GL831134.1;GL831134.1;GL831134.1;GL831134.1;GL831134.1;GL831134.1;GL831134.1;GL831134.1;GL831134.1;GL831134.1;GL831134.1;GL831134.1;GL831134.1;GL831134.1;GL831134.1;GL831134.1;GL831134.1;GL831134.1;GL831134.1;GL831134.1;GL831134.1;GL831134.1;GL8…	8898033;8898042;8898063;8899681;8899681;8899681;8900867;8900867;8900867;8901250;8901250;8901250;8901702;8901702;8901702;8902915;8902915;8902915;8906150;8906150;8906150;8910615;8910615;8910615;8910867;8911126;8911472;8912452;8913183;8913625;8914273;8914345;8914345;8914435;8914922;8915342;8917022;8917121;8918549;8920204;8921954;8922005;8922005;8922244;8922244;8922248;8922497;8922712;8923358;8923358…	8898151;8898151;8898151;8899863;8899863;8899863;8901011;8901011;8901011;8901332;8901332;8901332;8901808;8901808;8901808;8902966;8902966;8902966;8906263;8906263;8906263;8910731;8910731;8910731;8910953;8911199;8911627;8912502;8913203;8913752;8914331;8915116;8915730;8914774;8915714;8915747;8917058;8917178;8918566;8920221;8921961;8922167;8922167;8922401;8922401;8922341;8922586;8922855;8923642;8923642…	-;-;-;-;-;-;-;-;-;-;-;-;-;-;-;-;-;-;-;-;-;-;-;-;-;-;-;-;-;-;-;-;-;-;-;-;-;-;-;-;-;-;-;-;-;-;-;-;-;-;-;-;-;-;-;-;-;-;-;-;-;-;-;-;-;-	5363	8131	12450	4979	8406	10612	12799	7777	9937	6852	9358	11061	7593	11563	11203	9959	10129	8665	6918	6006	6417	8023	9736	11562	10830	4934	7787	7270	6547	4431	7924
ENSONIG00000026564	GL831134.1;GL831134.1;GL831134.1	8959828;8967987;8969919	8959910;8968092;8970269	+;+;+	540	0	0	0	1	0	1	0	1	0	0	0	1	0	0	1	0	3	0	1	0	0	2	2	0	0	2	0	0	0	3
ENSONIG00000022723	GL831134.1;GL831134.1	8967996;8995312	8968365;8996435	-;-	1494	79	54	29	71	45	22	52	45	11	55	60	82	58	80	59	73	29	33	21	30	51	47	54	50	55	22	27	38	29	49
ENSONIG00000022111	GL831134.1	8982218	8982317	+	100	2	0	2	2	0	0	1	0	1	0	0	1	1	0	0	0	0	3	0	2	0	0	0	4	0	1	0	0	1	1
ENSONIG00000010158	GL831134.1;GL831134.1;GL831134.1;GL831134.1;GL831134.1;GL831134.1;GL831134.1	9011342;9011783;9012491;9012706;9013031;9013351;9014336	9011667;9011934;9012607;9012872;9013056;9013462;9014416	-;-;-;-;-;-;-	981	153	377	174	218	197	269	202	361	281	241	301	184	246	278	241	209	261	200	156	219	183	205	315	264	233	247	150	188	111	199
ENSONIG00000010159	GL831134.1;GL831134.1;GL831134.1;GL831134.1;GL831134.1;GL831134.1;GL831134.1;GL831134.1	9018995;9019297;9019574;9019786;9020042;9020690;9023495;9023884	9019207;9019434;9019705;9019931;9020603;9020775;9023636;9024033	-;-;-;-;-;-;-;-	1569	180	298	120	203	258	305	217	265	248	213	227	156	264	213	325	181	268	220	191	217	186	244	273	156	439	203	247	155	127	178
ENSONIG00000010160	GL831134.1;GL831134.1;GL831134.1;GL831134.1;GL831134.1;GL831134.1;GL831134.1;GL831134.1;GL831134.1;GL831134.1;GL831134.1;GL831134.1;GL831134.1;GL831134.1;GL831134.1;GL831134.1;GL831134.1;GL831134.1;GL831134.1	9024410;9024916;9025071;9025642;9025835;9026027;9026156;9027606;9027858;9028028;9028245;9029445;9029805;9030021;9030175;9030328;9030544;9033665;9033882	9024795;9024933;9025136;9025737;9025929;9026054;9026311;9027752;9027948;9028131;9028322;9029510;9029888;9030070;9030252;9030439;9030634;9033792;9036494	+;+;+;+;+;+;+;+;+;+;+;+;+;+;+;+;+;+;+	4487	422	971	418	675	578	929	367	847	707	538	814	310	627	701	619	553	522	384	431	352	424	429	600	566	706	468	511	612	284	443
ENSONIG00000010164	GL831134.1;GL831134.1;GL831134.1;GL831134.1;GL831134.1;GL831134.1;GL831134.1;GL831134.1;GL831134.1;GL831134.1;GL831134.1;GL831134.1;GL831134.1;GL831134.1	9051153;9051571;9053312;9053688;9054626;9055526;9055725;9056110;9056735;9058278;9059095;9059613;9059829;9060383	9051306;9051664;9053444;9053816;9054629;9055596;9055844;9056268;9056748;9058555;9059513;9059780;9059871;9060522	+;+;+;+;+;+;+;+;+;+;+;+;+;+	1926	331	446	222	279	351	685	302	504	374	322	333	225	404	445	438	310	381	402	309	385	258	286	366	276	372	344	206	334	182	238
ENSONIG00000010166	GL831134.1;GL831134.1;GL831134.1;GL831134.1;GL831134.1	9065875;9068997;9069174;9069713;9070643	9066064;9069075;9069245;9069782;9070762	+;+;+;+;+	531	489	961	454	881	913	1445	692	1090	727	719	1655	793	918	1094	2141	1247	1022	845	467	747	808	956	1054	1164	2404	932	599	666	405	595
ENSONIG00000010169	GL831134.1;GL831134.1;GL831134.1;GL831134.1;GL831134.1	9074812;9074971;9075210;9075432;9075644	9074890;9075103;9075321;9075538;9075743	-;-;-;-;-	531	9473	16761	6242	13073	12980	17674	9349	14301	10691	11037	15243	12474	18805	16205	15996	10945	11706	9549	7650	9059	10972	13357	15177	16437	8383	10685	8838	9256	6189	9626
ENSONIG00000010171	GL831134.1;GL831134.1;GL831134.1;GL831134.1;GL831134.1;GL831134.1;GL831134.1;GL831134.1;GL831134.1;GL831134.1;GL831134.1;GL831134.1;GL831134.1;GL831134.1;GL831134.1;GL831134.1	9079296;9079347;9080146;9080254;9080254;9080670;9080670;9080927;9080984;9081359;9083928;9083928;9084081;9084081;9084318;9084318	9079477;9079477;9080157;9080487;9080487;9080775;9080775;9081469;9081244;9081469;9083990;9083990;9084168;9084168;9084460;9084547	-;-;-;-;-;-;-;-;-;-;-;-;-;-;-;-	1458	300	390	241	366	370	477	324	433	302	378	284	193	405	279	407	378	363	330	275	276	306	317	319	434	352	263	348	294	160	218
ENSONIG00000010173	GL831134.1;GL831134.1;GL831134.1;GL831134.1;GL831134.1;GL831134.1;GL831134.1;GL831134.1;GL831134.1;GL831134.1;GL831134.1;GL831134.1;GL831134.1;GL831134.1;GL831134.1	9088645;9089554;9093097;9097735;9098082;9098254;9098504;9098766;9099264;9099848;9100191;9100518;9100787;9101209;9101863	9089263;9089746;9093168;9097880;9098143;9098416;9098684;9098909;9099444;9100052;9100220;9100693;9100929;9101580;9102021	+;+;+;+;+;+;+;+;+;+;+;+;+;+;+	2846	439	713	319	478	532	1027	403	554	591	606	582	400	580	501	655	467	582	487	413	437	454	481	612	575	542	472	475	437	275	446
ENSONIG00000010176	GL831134.1;GL831134.1;GL831134.1;GL831134.1;GL831134.1;GL831134.1;GL831134.1;GL831134.1;GL831134.1	9106260;9110898;9111238;9113913;9114134;9114499;9114955;9115232;9122439	9106506;9111091;9111295;9114040;9114270;9114631;9115050;9115315;9122725	-;-;-;-;-;-;-;-;-	1364	777	1477	711	960	857	1401	795	967	969	1075	1018	596	1006	1019	1117	959	1018	874	664	756	825	859	963	858	1780	727	892	714	461	793
ENSONIG00000010178	GL831134.1;GL831134.1;GL831134.1;GL831134.1;GL831134.1;GL831134.1;GL831134.1;GL831134.1;GL831134.1;GL831134.1;GL831134.1;GL831134.1;GL831134.1;GL831134.1	9125823;9126057;9127340;9128438;9128662;9128980;9129374;9129794;9130827;9131029;9131310;9131722;9131967;9132586	9125849;9126186;9127485;9128544;9128839;9129086;9129702;9129917;9130927;9131152;9131558;9131822;9132135;9132872	-;-;-;-;-;-;-;-;-;-;-;-;-;-	2179	338	699	244	502	502	615	326	568	468	447	389	301	385	403	769	358	516	441	414	379	419	431	613	415	708	485	448	451	157	425
ENSONIG00000010181	GL831134.1;GL831134.1;GL831134.1;GL831134.1;GL831134.1;GL831134.1;GL831134.1;GL831134.1;GL831134.1	9133360;9134487;9134781;9134936;9135369;9135522;9137196;9137623;9139961	9133700;9134545;9134841;9135174;9135437;9135591;9137289;9137738;9141418	+;+;+;+;+;+;+;+;+	2507	291	582	283	311	349	488	244	393	346	309	268	275	429	376	531	340	334	333	322	327	355	417	427	312	305	416	316	231	227	286
ENSONIG00000010188	GL831134.1;GL831134.1;GL831134.1;GL831134.1;GL831134.1;GL831134.1;GL831134.1;GL831134.1;GL831134.1;GL831134.1;GL831134.1;GL831134.1;GL831134.1;GL831134.1;GL831134.1;GL831134.1;GL831134.1;GL831134.1;GL831134.1;GL831134.1	9146125;9146950;9147065;9149846;9149846;9153229;9153229;9162196;9162196;9175064;9175064;9175316;9175316;9175639;9175639;9176288;9176288;9176653;9176807;9177189	9147419;9147013;9147419;9150269;9150269;9153390;9153390;9162414;9162414;9175210;9175210;9175556;9175556;9175803;9175803;9177237;9176607;9176734;9177071;9177237	+;+;+;+;+;+;+;+;+;+;+;+;+;+;+;+;+;+;+;+	3603	544	1023	482	715	655	953	533	543	794	736	526	424	766	904	580	544	699	567	510	540	558	770	798	772	500	506	640	569	342	516
ENSONIG00000026544	GL831134.1;GL831134.1	9192556;9200821	9192751;9201225	+;+	601	0	0	0	1	0	0	0	0	0	0	0	0	0	0	0	0	0	0	0	0	0	0	0	1	0	0	0	0	0	0
ENSONIG00000026689	GL831134.1;GL831134.1;GL831134.1;GL831134.1;GL831134.1;GL831134.1	9206078;9206078;9208148;9208148;9208979;9209984	9207998;9207998;9208420;9209146;9209146;9209990	-;-;-;-;-;-	2927	3	2	0	0	0	0	6	0	0	0	9	0	1	1	1	0	1	1	0	0	0	6	0	8	0	0	0	0	0	0
ENSONIG00000010190	GL831134.1;GL831134.1;GL831134.1;GL831134.1	9212712;9213503;9215891;9216491	9212753;9213762;9216124;9217682	+;+;+;+	1728	3348	5138	2551	4189	4059	5965	3313	4859	4225	3795	4218	2574	4155	4445	6553	3748	4828	3813	2842	3426	3543	3749	4111	3532	6727	3521	3427	3257	1781	3048
ENSONIG00000021481	GL831134.1	9221603	9221706	-	104	24	19	12	36	29	36	30	34	16	36	53	23	35	58	90	47	28	15	15	17	25	32	17	41	103	27	10	17	15	28
ENSONIG00000010194	GL831134.1;GL831134.1;GL831134.1;GL831134.1;GL831134.1;GL831134.1;GL831134.1;GL831134.1;GL831134.1;GL831134.1;GL831134.1;GL831134.1;GL831134.1;GL831134.1;GL831134.1;GL831134.1;GL831134.1;GL831134.1;GL831134.1;GL831134.1;GL831134.1;GL831134.1;GL831134.1;GL831134.1;GL831134.1;GL831134.1;GL831134.1;GL831134.1	9227867;9231834;9231928;9231994;9231994;9232668;9232668;9233063;9233063;9233414;9233414;9233733;9233733;9234334;9234334;9234534;9234534;9234811;9234811;9234992;9234992;9235885;9235885;9236115;9236115;9236706;9236706;9237486	9231875;9231875;9231939;9232086;9232086;9232772;9232772;9233296;9233296;9233598;9233598;9233835;9233835;9234399;9234399;9234717;9234717;9234896;9234896;9235122;9235122;9235948;9235948;9236243;9236243;9236774;9236778;9237812	-;-;-;-;-;-;-;-;-;-;-;-;-;-;-;-;-;-;-;-;-;-;-;-;-;-;-;-	5801	704	1138	635	779	860	1397	598	1157	729	773	894	576	808	980	1102	837	980	813	665	869	699	800	854	778	1756	781	776	702	387	690
ENSONIG00000010198	GL831134.1;GL831134.1;GL831134.1;GL831134.1;GL831134.1;GL831134.1;GL831134.1;GL831134.1	9247817;9248605;9248985;9249137;9249368;9249709;9249940;9250573	9247998;9248873;9249031;9249246;9249417;9249849;9250008;9253146	+;+;+;+;+;+;+;+	3442	789	1511	624	1057	1306	1542	770	1332	974	852	1491	690	1225	1004	1613	848	1027	904	696	805	938	990	1173	1077	1919	919	1007	766	466	871
ENSONIG00000024837	GL831134.1;GL831134.1;GL831134.1	9262872;9266183;9267173	9263001;9266224;9267687	-;-;-	687	2	0	4	3	0	0	0	0	1	0	1	0	0	0	0	0	4	0	1	2	0	0	0	0	0	4	4	0	0	0
ENSONIG00000022687	GL831134.1;GL831134.1;GL831134.1	9274940;9275909;9283122	9275650;9276039;9283160	-;-;-	881	0	1	0	0	0	0	1	0	0	0	0	0	0	0	0	0	0	0	0	0	0	0	0	0	0	0	0	0	0	0
ENSONIG00000025342	GL831134.1;GL831134.1	9283474;9283775	9283600;9283919	+;+	272	0	0	0	0	0	0	0	0	0	0	0	0	0	0	0	0	0	0	0	0	0	0	0	0	0	0	0	0	0	0
ENSONIG00000010199	GL831134.1;GL831134.1;GL831134.1	9333596;9334984;9335871	9334205;9335727;9336440	+;+;+	1924	791	1053	413	771	949	1129	481	630	699	848	801	473	872	1039	888	678	579	562	662	558	472	748	905	772	460	547	619	502	349	491
ENSONIG00000010200	GL831134.1;GL831134.1;GL831134.1;GL831134.1;GL831134.1;GL831134.1;GL831134.1;GL831134.1;GL831134.1;GL831134.1	9373336;9374119;9375179;9376104;9378240;9378544;9378765;9379079;9380298;9380737	9373918;9374222;9375333;9376275;9378381;9378638;9378979;9379261;9380433;9381371	+;+;+;+;+;+;+;+;+;+	2420	0	6	0	0	0	3	0	2	6	0	0	2	0	0	2	0	0	3	2	0	0	1	2	0	0	2	2	6	2	4
ENSONIG00000010201	GL831134.1;GL831134.1;GL831134.1;GL831134.1;GL831134.1;GL831134.1;GL831134.1;GL831134.1;GL831134.1;GL831134.1;GL831134.1;GL831134.1	9382606;9383365;9383608;9385046;9385861;9386242;9386835;9387223;9387709;9387871;9388080;9388331	9382877;9383530;9383818;9385192;9385938;9386293;9386959;9387436;9387761;9387932;9388125;9391418	+;+;+;+;+;+;+;+;+;+;+;+	4514	2612	3837	1832	2610	2557	3687	1840	3147	2607	2523	2851	1581	2463	2670	3368	2129	3242	2327	2041	2074	2072	2361	2701	1989	2201	2597	2160	2046	1092	2127
ENSONIG00000010206	GL831134.1;GL831134.1;GL831134.1;GL831134.1;GL831134.1;GL831134.1;GL831134.1;GL831134.1;GL831134.1;GL831134.1;GL831134.1;GL831134.1;GL831134.1;GL831134.1;GL831134.1;GL831134.1;GL831134.1;GL831134.1;GL831134.1;GL831134.1	9396936;9397416;9405498;9406087;9406838;9406999;9407513;9408919;9409435;9409694;9409972;9410156;9412919;9413095;9413406;9413653;9413837;9413905;9413999;9416244	9397010;9397488;9405571;9406162;9406878;9407134;9407562;9409018;9409571;9409844;9410030;9410234;9412995;9413271;9413517;9413782;9413851;9413940;9414237;9416383	+;+;+;+;+;+;+;+;+;+;+;+;+;+;+;+;+;+;+;+	1977	232	371	146	295	232	345	222	337	249	231	289	210	264	300	317	226	245	203	153	172	235	222	265	204	209	219	199	172	98	192
ENSONIG00000010217	GL831134.1;GL831134.1;GL831134.1;GL831134.1;GL831134.1;GL831134.1;GL831134.1	9425460;9427504;9429454;9429757;9429942;9432952;9433214	9425748;9427660;9429591;9429847;9430119;9433098;9434095	+;+;+;+;+;+;+	1882	358	612	303	407	542	692	304	532	383	376	569	365	534	581	718	467	382	362	289	371	363	352	399	399	777	387	430	255	178	368
ENSONIG00000010220	GL831134.1;GL831134.1;GL831134.1;GL831134.1;GL831134.1	9435856;9437920;9438263;9441941;9442120	9436425;9438163;9439478;9442010;9445154	+;+;+;+;+	5135	392	768	330	608	717	842	408	706	554	674	697	419	541	752	779	555	630	453	464	462	485	518	674	605	870	587	536	445	330	478
ENSONIG00000010221	GL831134.1;GL831134.1;GL831134.1;GL831134.1;GL831134.1;GL831134.1;GL831134.1;GL831134.1;GL831134.1;GL831134.1;GL831134.1;GL831134.1;GL831134.1;GL831134.1;GL831134.1;GL831134.1;GL831134.1;GL831134.1;GL831134.1;GL831134.1;GL831134.1;GL831134.1;GL831134.1;GL831134.1;GL831134.1;GL831134.1;GL831134.1;GL831134.1;GL831134.1;GL831134.1;GL831134.1;GL831134.1;GL831134.1;GL831134.1;GL831134.1;GL831134.1;GL8…	9450699;9450699;9451067;9451067;9452636;9452636;9453433;9453952;9453952;9454480;9454480;9454659;9454659;9455172;9455172;9455336;9455336;9455926;9455926;9456433;9456433;9456605;9456605;9457106;9457106;9457265;9457265;9458398;9458398;9458591;9458591;9458817;9458817;9459557;9459557;9459769;9459769;9460245;9460245;9460535;9460535;9461772;9461772;9462134;9462134;9462533;9462533;9462793;9462793;9463171…	9450978;9450978;9451223;9451223;9452722;9452722;9453489;9454099;9454099;9454560;9454560;9454759;9454759;9455187;9455187;9455459;9455459;9456069;9456069;9456521;9456521;9456682;9456682;9457183;9457183;9457408;9457408;9458494;9458494;9458717;9458717;9458902;9458902;9459684;9459684;9459903;9459903;9460334;9460334;9460603;9460603;9461925;9461925;9462297;9462297;9462648;9462648;9462962;9462962;9463312…	-;-;-;-;-;-;-;-;-;-;-;-;-;-;-;-;-;-;-;-;-;-;-;-;-;-;-;-;-;-;-;-;-;-;-;-;-;-;-;-;-;-;-;-;-;-;-;-;-;-;-;-;-;-;-;-;-;-;-;-;-;-;-;-;-;-;-;-;-;-;-;-;-;-;-;-;-;-;-;-;-;-;-;-;-;-	5344	1463	2899	1086	1680	1745	2873	1360	1373	1960	1944	1462	1023	1680	2016	1712	1417	1981	1676	1388	1527	1373	1814	1716	1774	1711	1343	1478	1291	852	1251
ENSONIG00000010224	GL831134.1;GL831134.1;GL831134.1;GL831134.1;GL831134.1;GL831134.1;GL831134.1;GL831134.1;GL831134.1	9484726;9485872;9487165;9487517;9487722;9488030;9488789;9489505;9490601	9485785;9485991;9487321;9487622;9487919;9488222;9488876;9489651;9490762	+;+;+;+;+;+;+;+;+	2231	955	1361	691	1124	1228	1450	908	1189	1213	1094	1049	827	1175	1189	1059	967	1104	900	767	841	988	1009	1385	977	720	866	819	680	573	898
ENSONIG00000010226	GL831134.1;GL831134.1;GL831134.1;GL831134.1;GL831134.1;GL831134.1;GL831134.1;GL831134.1;GL831134.1;GL831134.1;GL831134.1;GL831134.1;GL831134.1;GL831134.1	9492925;9494038;9494313;9494613;9495676;9496092;9496341;9496666;9497130;9497464;9497729;9498024;9499453;9500868	9493118;9494170;9494495;9494966;9495918;9496215;9496536;9496918;9497235;9497642;9497940;9498205;9499667;9501332	-;-;-;-;-;-;-;-;-;-;-;-;-;-	3039	4039	7135	3714	5437	4997	10232	4195	7523	6342	5233	6005	3446	5652	5695	6491	4945	7251	6259	4404	5525	3990	5049	5568	5014	6355	5852	4587	5048	2596	4324
ENSONIG00000010228	GL831134.1;GL831134.1;GL831134.1;GL831134.1;GL831134.1;GL831134.1;GL831134.1;GL831134.1;GL831134.1;GL831134.1	9508422;9508864;9511202;9512477;9512767;9513165;9516411;9517691;9518058;9518261	9508541;9509085;9511229;9512607;9512877;9513271;9516479;9517775;9518151;9518286	+;+;+;+;+;+;+;+;+;+	993	4	2	2	7	13	1	5	4	1	5	10	0	1	1	13	2	5	4	7	0	5	2	9	6	4	8	11	2	0	5
ENSONIG00000010229	GL831134.1;GL831134.1;GL831134.1;GL831134.1;GL831134.1;GL831134.1	9522040;9523712;9523721;9524249;9524249;9524440	9522696;9524155;9524155;9524409;9526408;9524839	+;+;+;+;+;+	3261	217	383	170	308	216	463	212	345	288	255	366	271	266	366	397	306	339	235	193	201	278	256	317	252	398	304	254	228	151	225
ENSONIG00000010230	GL831134.1;GL831134.1;GL831134.1;GL831134.1;GL831134.1;GL831134.1;GL831134.1;GL831134.1	9535557;9535825;9538408;9538581;9539582;9540837;9543797;9544364	9535673;9535948;9538488;9538676;9539641;9541019;9543924;9544872	-;-;-;-;-;-;-;-	1298	51	71	17	52	75	136	54	60	76	50	78	31	60	51	61	73	75	50	65	40	68	38	54	71	79	66	43	52	21	44
ENSONIG00000010234	GL831134.1;GL831134.1;GL831134.1;GL831134.1;GL831134.1	9547242;9548259;9549196;9549710;9549913	9547654;9548393;9549293;9549796;9550703	-;-;-;-;-	1524	442	758	320	547	502	860	465	609	497	508	510	360	504	626	663	505	582	499	386	406	474	503	601	413	968	594	442	429	230	488
ENSONIG00000010237	GL831134.1;GL831134.1;GL831134.1;GL831134.1;GL831134.1;GL831134.1;GL831134.1;GL831134.1;GL831134.1;GL831134.1;GL831134.1;GL831134.1;GL831134.1;GL831134.1;GL831134.1;GL831134.1;GL831134.1;GL831134.1;GL831134.1;GL831134.1;GL831134.1	9550859;9551366;9552803;9552803;9553200;9553500;9553500;9553770;9553770;9554071;9554071;9556036;9556036;9556247;9556247;9556618;9556618;9556836;9556881;9557253;9557253	9551670;9551670;9553010;9553406;9553406;9553595;9553595;9553915;9553915;9554233;9554233;9556150;9556150;9556439;9556439;9556740;9556740;9557158;9557158;9557743;9557743	+;+;+;+;+;+;+;+;+;+;+;+;+;+;+;+;+;+;+;+;+	3066	340	439	223	458	388	722	373	536	385	302	603	448	521	513	661	489	466	396	291	267	362	534	485	491	880	392	368	333	172	325
ENSONIG00000010239	GL831134.1;GL831134.1;GL831134.1;GL831134.1;GL831134.1;GL831134.1;GL831134.1;GL831134.1;GL831134.1;GL831134.1;GL831134.1;GL831134.1;GL831134.1;GL831134.1;GL831134.1;GL831134.1	9558512;9559187;9559327;9559753;9559993;9560329;9560614;9560931;9561158;9561358;9561567;9561743;9563194;9563495;9564657;9564976	9559077;9559239;9559499;9559868;9560215;9560485;9560792;9561082;9561268;9561457;9561665;9561805;9563339;9563808;9564803;9565456	-;-;-;-;-;-;-;-;-;-;-;-;-;-;-;-	3080	13	24	19	18	24	27	22	5	30	9	8	1	11	4	11	12	17	4	13	11	14	28	46	17	39	6	25	10	17	23
ENSONIG00000010244	GL831134.1;GL831134.1;GL831134.1;GL831134.1;GL831134.1;GL831134.1;GL831134.1;GL831134.1;GL831134.1;GL831134.1;GL831134.1	9567335;9567476;9567685;9567860;9571368;9571543;9571774;9572010;9572155;9572359;9573277	9567390;9567616;9567780;9567962;9571437;9571674;9571925;9572066;9572274;9572430;9573384	-;-;-;-;-;-;-;-;-;-;-	1107	146	326	130	213	175	249	160	261	213	208	205	152	209	291	236	222	235	158	115	138	187	207	225	215	337	193	196	152	108	234
ENSONIG00000010245	GL831134.1;GL831134.1;GL831134.1;GL831134.1;GL831134.1;GL831134.1;GL831134.1;GL831134.1	9576054;9577143;9577628;9578638;9579025;9579403;9579771;9587207	9576241;9577276;9577731;9578796;9579158;9579619;9579839;9587251	-;-;-;-;-;-;-;-	1050	83	169	64	79	94	74	58	119	111	104	90	65	133	96	151	58	147	77	57	79	82	96	86	103	88	51	82	68	39	62
ENSONIG00000010247	GL831134.1;GL831134.1;GL831134.1;GL831134.1;GL831134.1;GL831134.1;GL831134.1;GL831134.1;GL831134.1;GL831134.1;GL831134.1;GL831134.1;GL831134.1;GL831134.1;GL831134.1;GL831134.1;GL831134.1;GL831134.1;GL831134.1;GL831134.1	9590861;9590861;9591109;9591109;9591758;9591758;9592597;9592597;9593189;9593189;9593797;9593797;9594946;9594946;9595335;9596265;9596265;9596518;9596518;9602527	9591022;9591022;9591221;9591221;9591868;9591868;9592704;9592704;9593321;9593321;9593918;9593918;9595313;9595461;9595461;9596406;9596406;9596610;9596603;9602533	-;-;-;-;-;-;-;-;-;-;-;-;-;-;-;-;-;-;-;-	1507	145	464	134	195	190	296	77	290	236	121	176	90	229	151	124	108	228	188	227	192	169	269	299	157	69	165	195	102	83	171
ENSONIG00000010252	GL831134.1;GL831134.1	9622181;9622256	9622240;9622918	+;+	723	0	0	1	0	0	0	0	2	0	0	0	0	2	0	0	1	0	0	0	0	0	0	0	0	0	0	0	1	0	0
ENSONIG00000010253	GL831134.1;GL831134.1;GL831134.1;GL831134.1;GL831134.1;GL831134.1;GL831134.1;GL831134.1;GL831134.1;GL831134.1;GL831134.1;GL831134.1;GL831134.1;GL831134.1;GL831134.1;GL831134.1;GL831134.1;GL831134.1;GL831134.1;GL831134.1;GL831134.1;GL831134.1;GL831134.1;GL831134.1;GL831134.1;GL831134.1;GL831134.1;GL831134.1;GL831134.1;GL831134.1;GL831134.1;GL831134.1;GL831134.1;GL831134.1;GL831134.1	9625322;9628804;9629207;9629418;9631339;9631339;9632875;9632875;9633547;9633547;9634998;9634998;9635328;9635328;9635704;9635704;9635919;9635919;9636218;9636218;9636882;9636882;9637269;9637269;9637440;9637440;9640148;9640148;9640306;9640306;9640800;9640800;9641832;9641832;9656300	9629964;9628821;9629333;9629964;9631400;9631400;9632952;9632952;9633687;9633687;9635174;9635174;9635477;9635477;9635835;9635835;9636136;9636136;9636306;9636306;9637001;9637001;9637359;9637359;9637538;9637538;9640210;9640210;9640366;9640366;9640911;9640911;9641952;9641955;9656958	-;-;-;-;-;-;-;-;-;-;-;-;-;-;-;-;-;-;-;-;-;-;-;-;-;-;-;-;-;-;-;-;-;-;-	7019	5446	8512	3909	5590	5937	8163	4202	6593	5713	6207	6280	3132	5906	6216	5791	4998	7386	4886	4900	4974	4607	6064	5863	6145	5522	4854	5365	4663	2619	4227
ENSONIG00000010262	GL831134.1;GL831134.1;GL831134.1;GL831134.1;GL831134.1;GL831134.1	9658593;9659498;9660326;9660966;9662257;9663286	9658781;9659583;9660810;9661160;9662436;9663511	+;+;+;+;+;+	1361	15	47	16	60	44	35	24	28	37	28	97	63	55	35	27	30	11	15	9	19	50	80	96	107	21	41	29	21	21	38
ENSONIG00000010263	GL831134.1;GL831134.1;GL831134.1;GL831134.1;GL831134.1;GL831134.1;GL831134.1;GL831134.1;GL831134.1;GL831134.1;GL831134.1;GL831134.1;GL831134.1	9669050;9669778;9671329;9671510;9671713;9671901;9672061;9673550;9673970;9674339;9675006;9675201;9676005	9669065;9669888;9671410;9671566;9671803;9671963;9672132;9673636;9674073;9674408;9675051;9675344;9676208	-;-;-;-;-;-;-;-;-;-;-;-;-	1147	0	5	2	0	0	0	0	4	0	0	0	0	1	4	0	3	1	2	0	0	1	0	0	1	2	0	9	5	2	0
ENSONIG00000010265	GL831134.1;GL831134.1;GL831134.1;GL831134.1;GL831134.1;GL831134.1;GL831134.1;GL831134.1;GL831134.1;GL831134.1;GL831134.1;GL831134.1;GL831134.1;GL831134.1;GL831134.1;GL831134.1;GL831134.1;GL831134.1;GL831134.1;GL831134.1;GL831134.1;GL831134.1;GL831134.1;GL831134.1;GL831134.1;GL831134.1;GL831134.1;GL831134.1;GL831134.1;GL831134.1;GL831134.1;GL831134.1	9686488;9687816;9688115;9689013;9689242;9689743;9690899;9691707;9693824;9694093;9694747;9695142;9696979;9697323;9698114;9699420;9699848;9700158;9701853;9702685;9703530;9704069;9704368;9706756;9707157;9708167;9709230;9709996;9715882;9724472;9733099;9734575	9686556;9687954;9688269;9689138;9689368;9689921;9691184;9691861;9693943;9694268;9694870;9695239;9697091;9697334;9698268;9699638;9699935;9700411;9701947;9703335;9703647;9704262;9704689;9706896;9707293;9708368;9709609;9710265;9715992;9724660;9733240;9734790	-;-;-;-;-;-;-;-;-;-;-;-;-;-;-;-;-;-;-;-;-;-;-;-;-;-;-;-;-;-;-;-	5763	4087	7917	2897	5042	4996	8573	4009	4966	4936	5179	4489	2916	4947	5610	4824	4626	5364	4487	3972	3977	3797	5033	5608	5360	4536	4490	4429	3816	2497	3826
ENSONIG00000021435	GL831134.1	9756673	9758526	-	1854	321	449	229	386	415	460	259	357	287	293	351	310	419	401	559	341	316	269	208	290	299	381	443	349	297	283	276	244	156	239
ENSONIG00000010274	GL831134.1;GL831134.1;GL831134.1	9762086;9763469;9764730	9763325;9764216;9765189	-;-;-	2448	1621	2673	1327	1797	2111	2733	1212	2297	1916	1581	2316	1005	1710	1907	2134	1807	2372	1656	1319	1568	1285	1901	1896	1693	2282	1799	1745	1490	721	1659
ENSONIG00000010276	GL831134.1;GL831134.1;GL831134.1;GL831134.1;GL831134.1;GL831134.1;GL831134.1;GL831134.1	9796874;9796910;9797257;9797257;9797962;9798241;9798464;9798899	9796978;9796978;9797408;9797408;9797992;9798265;9798526;9798931	+;+;+;+;+;+;+;+	409	3358	4473	2544	3738	3606	4733	2675	4764	3483	3297	4466	2670	3562	3892	5773	3797	4152	3179	2239	2983	3232	3317	3728	3115	6505	3624	2476	2678	1569	2953
ENSONIG00000010278	GL831134.1;GL831134.1;GL831134.1;GL831134.1;GL831134.1;GL831134.1;GL831134.1;GL831134.1;GL831134.1;GL831134.1;GL831134.1;GL831134.1;GL831134.1;GL831134.1;GL831134.1;GL831134.1;GL831134.1;GL831134.1;GL831134.1;GL831134.1;GL831134.1;GL831134.1;GL831134.1;GL831134.1;GL831134.1;GL831134.1;GL831134.1;GL831134.1;GL831134.1;GL831134.1;GL831134.1;GL831134.1;GL831134.1;GL831134.1	9800584;9804402;9804569;9804596;9804794;9804794;9805012;9805012;9806949;9806949;9807539;9807539;9808084;9808084;9808371;9808371;9808824;9808824;9809037;9809037;9809218;9809218;9809498;9810639;9810639;9810895;9810895;9811048;9811333;9811589;9812216;9814167;9814170;9814369	9800677;9804430;9804658;9804658;9804924;9804924;9805129;9805129;9807101;9807101;9807838;9807838;9808292;9808292;9808454;9808454;9808872;9808872;9809121;9809121;9809388;9809388;9809503;9810795;9810795;9810963;9810963;9811606;9811507;9811606;9812290;9814253;9814253;9815979	+;+;+;+;+;+;+;+;+;+;+;+;+;+;+;+;+;+;+;+;+;+;+;+;+;+;+;+;+;+;+;+;+;+	4077	1193	2366	816	1336	1321	2052	1007	1702	1514	1632	1484	936	1242	1567	1206	1318	1575	1260	1041	1075	1084	1395	1568	1535	1593	1447	1276	945	585	1238
ENSONIG00000010283	GL831134.1;GL831134.1;GL831134.1;GL831134.1;GL831134.1;GL831134.1;GL831134.1;GL831134.1;GL831134.1;GL831134.1;GL831134.1;GL831134.1;GL831134.1;GL831134.1;GL831134.1;GL831134.1;GL831134.1;GL831134.1;GL831134.1;GL831134.1;GL831134.1;GL831134.1;GL831134.1;GL831134.1;GL831134.1;GL831134.1;GL831134.1;GL831134.1;GL831134.1;GL831134.1;GL831134.1;GL831134.1;GL831134.1;GL831134.1;GL831134.1;GL831134.1;GL8…	9826276;9826276;9828843;9828843;9829003;9829230;9829230;9831669;9831669;9832159;9832159;9832523;9832523;9832658;9832658;9832943;9832943;9833257;9833257;9834105;9834122;9834305;9834305;9834609;9834609;9837162;9837162;9837563;9838311;9838311;9847924;9847924;9848690;9848690;9849098;9849098;9851533;9851533;9852278;9852278;9852767	9826393;9826393;9828966;9829028;9829034;9829417;9829417;9831818;9831845;9832368;9832368;9832584;9832584;9832843;9832843;9833056;9833056;9833329;9833315;9834216;9834216;9834464;9834464;9834733;9834733;9837364;9837698;9837698;9838466;9838466;9848278;9848278;9848800;9848800;9849295;9849295;9851600;9851600;9852309;9853023;9852825	-;-;-;-;-;-;-;-;-;-;-;-;-;-;-;-;-;-;-;-;-;-;-;-;-;-;-;-;-;-;-;-;-;-;-;-;-;-;-;-;-	3888	2561	3902	1459	2238	2876	3297	2287	2801	2140	2809	2551	1620	2503	2735	2628	2528	2562	2096	1862	1957	2168	2565	2783	2657	1455	1989	1995	1684	1180	2117
ENSONIG00000010316	GL831134.1;GL831134.1;GL831134.1;GL831134.1	9859735;9860066;9860727;9860945	9859945;9860177;9860804;9862174	+;+;+;+	1631	9	14	21	20	15	48	11	40	29	17	38	13	25	15	39	26	30	28	17	7	9	39	47	25	28	12	9	20	11	14
ENSONIG00000023988	GL831134.1;GL831134.1	9894186;9895269	9895118;9895499	+;+	1164	5	7	12	7	7	32	2	12	5	10	8	10	10	13	10	7	17	2	1	16	4	5	5	8	19	4	2	6	0	3
ENSONIG00000010319	GL831134.1;GL831134.1;GL831134.1;GL831134.1;GL831134.1;GL831134.1;GL831134.1;GL831134.1;GL831134.1;GL831134.1;GL831134.1;GL831134.1;GL831134.1;GL831134.1;GL831134.1;GL831134.1;GL831134.1;GL831134.1;GL831134.1;GL831134.1;GL831134.1;GL831134.1;GL831134.1;GL831134.1;GL831134.1;GL831134.1;GL831134.1;GL831134.1;GL831134.1;GL831134.1;GL831134.1;GL831134.1;GL831134.1;GL831134.1;GL831134.1;GL831134.1;GL8…	9918081;9932218;9932294;9937624;9937624;9939019;9939019;9939242;9939242;9957594;9957594;9960333;9960333;9961213;9961453;9961456;9965031;9965031;9967362;9967362;9980176;9980176;9980969;9980969;9981235;9981235;9989331;9989331;9992027;9992027;9993688;9993688;9994031;9994031;9995129;9995135;9995457;9995457	9918474;9932358;9932358;9937824;9937824;9939126;9939126;9939593;9939593;9957749;9957749;9960668;9960668;9961224;9961568;9961568;9965193;9965193;9967470;9967470;9980243;9980243;9981094;9981094;9981420;9981420;9989392;9989392;9992236;9992236;9993837;9993837;9994224;9994224;9995275;9995275;9995556;9999768	+;+;+;+;+;+;+;+;+;+;+;+;+;+;+;+;+;+;+;+;+;+;+;+;+;+;+;+;+;+;+;+;+;+;+;+;+;+	7543	12744	19270	9308	10419	12289	17048	9683	13880	12302	13084	11529	7517	11497	14195	12488	10040	13279	10627	9770	10282	9000	12039	12320	10292	11666	9676	10897	9539	5747	9942
ENSONIG00000010339	GL831134.1;GL831134.1;GL831134.1;GL831134.1;GL831134.1;GL831134.1;GL831134.1;GL831134.1;GL831134.1;GL831134.1;GL831134.1;GL831134.1;GL831134.1;GL831134.1;GL831134.1;GL831134.1;GL831134.1;GL831134.1;GL831134.1;GL831134.1;GL831134.1;GL831134.1;GL831134.1;GL831134.1;GL831134.1;GL831134.1;GL831134.1;GL831134.1;GL831134.1;GL831134.1;GL831134.1;GL831134.1;GL831134.1;GL831134.1;GL831134.1;GL831134.1;GL8…	10082461;10083078;10083390;10084438;10085276;10085747;10086056;10086458;10087079;10087379;10088461;10089095;10089851;10090061;10090633;10090961;10091391;10091554;10091694;10091918;10092199;10092508;10092814;10093025;10094624;10094826;10095415;10095806;10096181;10096517;10097025;10097575;10097793;10097991;10098204;10098671;10098944;10099207;10099411;10099956;10100185;10101217;10101439;10101899;101…	10082649;10083221;10083580;10084633;10085375;10085958;10086289;10086625;10087195;10087516;10088585;10089290;10089955;10090252;10090833;10091296;10091468;10091609;10091814;10092087;10092421;10092624;10092900;10093183;10094707;10094984;10095537;10095928;10096405;10096735;10097192;10097700;10097900;10098122;10098364;10098827;10099089;10099323;10099555;10100048;10100379;10101294;10101571;10102026;101…	+;+;+;+;+;+;+;+;+;+;+;+;+;+;+;+;+;+;+;+;+;+;+;+;+;+;+;+;+;+;+;+;+;+;+;+;+;+;+;+;+;+;+;+;+;+;+;+;+;+;+;+;+;+;+;+;+;+;+;+;+;+;+;+;+;+;+;+;+;+;+;+;+;+;+;+;+;+;+;+;+;+;+;+;+;+;+;+;+;+;+	13401	53	36	2	24	11	35	23	5	5	41	27	36	17	71	30	31	10	28	23	9	31	60	75	31	31	2	4	42	27	29
ENSONIG00000010354	GL831134.1;GL831134.1;GL831134.1;GL831134.1;GL831134.1;GL831134.1;GL831134.1;GL831134.1;GL831134.1;GL831134.1;GL831134.1;GL831134.1;GL831134.1	10120301;10120654;10121063;10121420;10124097;10124321;10126650;10128928;10129163;10129333;10129796;10131937;10133258	10120461;10120685;10121218;10121551;10124203;10124395;10126736;10129065;10129191;10129398;10129897;10132024;10133416	-;-;-;-;-;-;-;-;-;-;-;-;-	1332	12	34	17	12	26	30	33	26	20	28	46	6	17	34	28	17	6	31	26	25	19	34	39	31	2	9	26	15	24	18
ENSONIG00000010358	GL831134.1;GL831134.1;GL831134.1;GL831134.1;GL831134.1;GL831134.1;GL831134.1;GL831134.1;GL831134.1;GL831134.1;GL831134.1;GL831134.1;GL831134.1;GL831134.1;GL831134.1;GL831134.1;GL831134.1;GL831134.1;GL831134.1;GL831134.1;GL831134.1;GL831134.1;GL831134.1;GL831134.1;GL831134.1;GL831134.1;GL831134.1;GL831134.1;GL831134.1;GL831134.1;GL831134.1;GL831134.1;GL831134.1;GL831134.1;GL831134.1;GL831134.1;GL8…	10135274;10136374;10136625;10136625;10136802;10136802;10136962;10136962;10138043;10138043;10138210;10138210;10138430;10138430;10138770;10138770;10139098;10139098;10139348;10139348;10140033;10140033;10140203;10140209;10140322;10140322;10140495;10140495;10141140;10141154;10141598;10141621;10141801;10141813;10142272;10142272;10142866;10142866;10143913;10143913;10144453;10144453;10144824;10144824;101…	10136501;10136501;10136679;10136679;10136866;10136866;10137049;10137049;10138093;10138093;10138300;10138300;10138608;10138608;10138895;10138895;10139195;10139195;10139494;10139494;10140108;10140108;10140236;10140236;10140410;10140410;10140657;10140643;10141220;10141246;10141683;10141683;10141907;10141907;10142418;10142418;10142942;10142942;10143973;10143973;10144537;10144537;10145007;10145007;101…	-;-;-;-;-;-;-;-;-;-;-;-;-;-;-;-;-;-;-;-;-;-;-;-;-;-;-;-;-;-;-;-;-;-;-;-;-;-;-;-;-;-;-;-;-;-;-;-;-;-;-;-;-;-;-	4645	2275	3307	1896	2450	2268	2742	1654	2443	2365	2273	2657	1458	2319	3017	3178	1978	2563	1835	1623	1981	1843	2035	2274	2256	2805	1988	1964	1889	1281	1799
ENSONIG00000010372	GL831134.1;GL831134.1;GL831134.1;GL831134.1;GL831134.1;GL831134.1;GL831134.1;GL831134.1;GL831134.1;GL831134.1;GL831134.1;GL831134.1;GL831134.1;GL831134.1;GL831134.1;GL831134.1;GL831134.1;GL831134.1;GL831134.1;GL831134.1;GL831134.1	10168225;10171052;10171310;10171523;10173332;10173481;10173805;10174331;10174619;10174878;10175059;10175145;10175242;10175335;10175577;10176018;10176215;10176365;10176596;10176833;10177336	10170386;10171184;10171430;10171627;10173419;10173666;10173858;10174431;10174747;10174974;10175128;10175212;10175290;10175513;10175830;10176083;10176328;10176419;10176628;10177021;10177575	+;+;+;+;+;+;+;+;+;+;+;+;+;+;+;+;+;+;+;+;+	4493	15	27	28	71	18	58	7	62	41	15	46	21	32	42	34	41	57	35	48	36	21	40	43	19	45	10	12	26	23	17
ENSONIG00000010374	GL831134.1;GL831134.1;GL831134.1;GL831134.1;GL831134.1;GL831134.1;GL831134.1;GL831134.1;GL831134.1;GL831134.1;GL831134.1;GL831134.1;GL831134.1;GL831134.1;GL831134.1;GL831134.1;GL831134.1;GL831134.1;GL831134.1;GL831134.1;GL831134.1;GL831134.1;GL831134.1;GL831134.1;GL831134.1;GL831134.1;GL831134.1;GL831134.1;GL831134.1;GL831134.1;GL831134.1;GL831134.1;GL831134.1;GL831134.1;GL831134.1;GL831134.1;GL8…	10178637;10179336;10179591;10179591;10179842;10179842;10180107;10180107;10180322;10180322;10180546;10180546;10180845;10180845;10181027;10181027;10181263;10181263;10181461;10181461;10181615;10181615;10181935;10181935;10182128;10182128;10182354;10182354;10182642;10182642;10182805;10182805;10182982;10182982;10183475;10183475;10183677;10183677;10183977;10183977;10184308;10184308;10184578;10184578;101…	10178801;10179421;10179716;10179716;10179937;10179937;10180217;10180217;10180423;10180423;10180713;10180713;10180938;10180938;10181101;10181101;10181342;10181342;10181535;10181535;10181771;10181771;10182044;10182044;10182271;10182271;10182520;10182520;10182703;10182703;10182900;10182900;10183106;10183106;10183572;10183572;10183870;10183870;10184190;10184190;10184439;10184439;10184842;10184842;101…	-;-;-;-;-;-;-;-;-;-;-;-;-;-;-;-;-;-;-;-;-;-;-;-;-;-;-;-;-;-;-;-;-;-;-;-;-;-;-;-;-;-;-;-;-;-;-;-;-;-	3569	69	72	56	93	53	85	80	83	84	41	55	32	71	71	46	63	66	58	23	20	62	52	88	23	44	71	40	58	8	41
ENSONIG00000010384	GL831134.1;GL831134.1;GL831134.1;GL831134.1;GL831134.1;GL831134.1;GL831134.1;GL831134.1;GL831134.1;GL831134.1	10197804;10200087;10200251;10200519;10200700;10200972;10201164;10201392;10202112;10203272	10199793;10200165;10200298;10200616;10200863;10201014;10201312;10201541;10202269;10203358	-;-;-;-;-;-;-;-;-;-	2966	400	598	315	436	500	608	359	533	533	527	488	243	433	527	666	344	473	383	384	300	288	395	397	336	424	386	322	371	180	332
ENSONIG00000010386	GL831134.1;GL831134.1;GL831134.1;GL831134.1;GL831134.1;GL831134.1;GL831134.1;GL831134.1;GL831134.1;GL831134.1;GL831134.1;GL831134.1;GL831134.1;GL831134.1;GL831134.1;GL831134.1;GL831134.1;GL831134.1	10207433;10208501;10209683;10210216;10210708;10210961;10211325;10211587;10211778;10212025;10212211;10212583;10213583;10214165;10214512;10214879;10215147;10216059	10207770;10208554;10209828;10210331;10210847;10211107;10211463;10211680;10211862;10212106;10212369;10212635;10213663;10214305;10214650;10215037;10215237;10220672	+;+;+;+;+;+;+;+;+;+;+;+;+;+;+;+;+;+	6778	3177	5669	2433	3839	3629	5594	2757	4374	3783	3549	4453	2395	3529	4054	4749	3406	4599	3125	2593	3131	2955	3672	4437	3396	5254	3599	3246	2661	1864	3165
ENSONIG00000010393	GL831134.1;GL831134.1;GL831134.1;GL831134.1;GL831134.1;GL831134.1;GL831134.1;GL831134.1;GL831134.1;GL831134.1;GL831134.1;GL831134.1;GL831134.1;GL831134.1;GL831134.1;GL831134.1;GL831134.1;GL831134.1;GL831134.1;GL831134.1;GL831134.1;GL831134.1;GL831134.1;GL831134.1;GL831134.1;GL831134.1;GL831134.1;GL831134.1;GL831134.1;GL831134.1;GL831134.1;GL831134.1;GL831134.1	10217167;10217728;10218238;10218425;10218425;10218676;10218676;10218922;10218922;10219205;10219205;10219467;10219467;10219675;10219675;10219909;10219909;10220261;10220261;10220439;10220439;10221037;10221037;10221216;10221216;10221545;10221966;10221966;10222527;10222527;10222753;10222753;10224645	10218333;10217742;10218333;10218550;10218550;10218816;10218816;10219066;10219066;10219338;10219338;10219580;10219580;10219821;10219821;10220034;10220034;10220360;10220360;10220601;10220601;10221126;10221126;10221343;10221343;10221604;10222077;10222050;10222659;10222659;10222860;10222861;10224799	-;-;-;-;-;-;-;-;-;-;-;-;-;-;-;-;-;-;-;-;-;-;-;-;-;-;-;-;-;-;-;-;-	3150	264	557	195	382	437	641	302	546	366	345	446	296	476	393	503	400	518	345	320	347	344	441	424	481	276	380	255	298	190	293
ENSONIG00000010401	GL831134.1;GL831134.1;GL831134.1;GL831134.1;GL831134.1;GL831134.1;GL831134.1;GL831134.1	10230506;10230975;10231217;10231673;10232034;10232220;10232454;10233815	10230619;10231074;10231333;10231824;10232112;10232362;10232642;10234036	+;+;+;+;+;+;+;+	1116	470	568	297	390	458	678	417	609	359	468	478	344	373	599	683	517	642	406	370	418	362	354	424	374	753	462	315	354	261	381
ENSONIG00000010404	GL831134.1;GL831134.1;GL831134.1;GL831134.1;GL831134.1;GL831134.1;GL831134.1;GL831134.1;GL831134.1;GL831134.1;GL831134.1	10237249;10237642;10237916;10238182;10238501;10240431;10241022;10241275;10241716;10242040;10246935	10237383;10237753;10238013;10238317;10238620;10240575;10241157;10241280;10241798;10242305;10247008	-;-;-;-;-;-;-;-;-;-;-	1311	6742	10610	5174	8698	8967	14901	6690	10191	8360	7807	9092	5859	8174	9270	11983	8445	10626	8499	6201	7480	6915	7325	8582	7303	14171	8633	7054	7186	4045	6425
ENSONIG00000010406	GL831134.1;GL831134.1;GL831134.1;GL831134.1;GL831134.1;GL831134.1;GL831134.1;GL831134.1;GL831134.1;GL831134.1;GL831134.1;GL831134.1;GL831134.1;GL831134.1;GL831134.1;GL831134.1;GL831134.1;GL831134.1;GL831134.1;GL831134.1;GL831134.1;GL831134.1;GL831134.1;GL831134.1;GL831134.1;GL831134.1;GL831134.1;GL831134.1;GL831134.1;GL831134.1;GL831134.1	10250176;10250176;10251687;10251776;10251776;10252097;10252097;10252678;10252678;10254049;10254049;10254309;10254309;10254459;10254459;10255281;10255281;10255553;10255553;10255760;10255760;10257641;10257641;10257972;10257972;10258679;10258679;10260801;10260801;10262320;10262320	10250534;10250534;10251698;10251979;10251979;10252264;10252264;10252809;10252809;10254198;10254198;10254376;10254376;10254535;10254535;10255420;10255420;10255622;10255622;10255850;10255850;10257776;10257776;10258084;10258084;10258794;10258794;10260870;10260870;10262480;10262995	-;-;-;-;-;-;-;-;-;-;-;-;-;-;-;-;-;-;-;-;-;-;-;-;-;-;-;-;-;-;-	2582	379	511	302	434	412	547	273	486	306	391	462	204	422	484	528	420	441	355	268	322	376	356	347	355	346	402	409	436	199	383
ENSONIG00000010410	GL831134.1;GL831134.1;GL831134.1;GL831134.1;GL831134.1;GL831134.1;GL831134.1;GL831134.1;GL831134.1;GL831134.1;GL831134.1;GL831134.1;GL831134.1;GL831134.1;GL831134.1;GL831134.1;GL831134.1;GL831134.1;GL831134.1;GL831134.1;GL831134.1;GL831134.1;GL831134.1;GL831134.1	10263502;10265758;10266045;10266298;10266533;10266788;10267128;10267382;10267772;10268021;10268401;10268608;10268791;10269033;10269414;10269661;10269882;10270523;10270832;10271895;10272113;10272683;10273602;10274133	10265563;10265886;10266122;10266435;10266671;10267002;10267238;10267589;10267902;10268164;10268507;10268696;10268901;10269232;10269556;10269760;10270028;10270671;10270958;10271981;10272250;10273377;10273703;10274311	-;-;-;-;-;-;-;-;-;-;-;-;-;-;-;-;-;-;-;-;-;-;-;-	5729	3779	4875	2559	3825	3849	6772	2944	4190	3855	4027	4553	2477	3901	4544	5223	3803	4323	4036	3169	3182	3558	3588	4374	3242	4928	3889	2880	3301	1915	3381
ENSONIG00000010418	GL831134.1;GL831134.1;GL831134.1;GL831134.1;GL831134.1;GL831134.1;GL831134.1;GL831134.1;GL831134.1;GL831134.1;GL831134.1;GL831134.1;GL831134.1;GL831134.1;GL831134.1;GL831134.1;GL831134.1;GL831134.1;GL831134.1;GL831134.1;GL831134.1;GL831134.1;GL831134.1;GL831134.1;GL831134.1;GL831134.1;GL831134.1;GL831134.1;GL831134.1;GL831134.1;GL831134.1;GL831134.1;GL831134.1;GL831134.1;GL831134.1;GL831134.1	10298969;10370284;10370285;10395950;10395950;10398343;10398343;10398602;10398602;10403848;10403848;10408471;10408471;10409309;10409309;10411318;10411318;10427004;10427004;10432795;10432795;10433242;10433242;10438043;10438043;10438311;10438437;10438460;10438834;10438837;10439097;10439097;10440663;10440663;10441015;10441015	10299208;10370407;10370407;10396145;10396145;10398454;10398454;10398698;10398698;10403997;10403997;10408656;10408656;10409566;10409566;10411439;10411439;10427169;10427166;10432961;10432961;10433390;10433390;10438248;10438248;10438342;10438604;10438604;10438982;10438982;10439217;10439217;10440853;10440853;10441230;10441230	+;+;+;+;+;+;+;+;+;+;+;+;+;+;+;+;+;+;+;+;+;+;+;+;+;+;+;+;+;+;+;+;+;+;+;+	3050	949	1172	661	999	814	1479	800	1050	1088	1152	1085	526	857	1094	1086	1014	1040	981	737	853	709	910	1136	964	799	969	844	726	446	839
ENSONIG00000010430	GL831134.1;GL831134.1;GL831134.1;GL831134.1;GL831134.1;GL831134.1	10450342;10489318;10490202;10490202;10533903;10546480	10452765;10489436;10491163;10490934;10534089;10546724	-;-;-;-;-;-	3937	431	849	389	506	569	709	356	526	619	499	642	325	614	457	526	384	757	425	472	405	444	598	588	516	494	478	522	435	190	409
ENSONIG00000010431	GL831134.1;GL831134.1;GL831134.1;GL831134.1;GL831134.1;GL831134.1;GL831134.1;GL831134.1;GL831134.1;GL831134.1	10467156;10467280;10467538;10467679;10468170;10468170;10468704;10469108;10469223;10469499	10467178;10467292;10468037;10468037;10468308;10468338;10468721;10469131;10469229;10469551	+;+;+;+;+;+;+;+;+;+	807	11	10	1	1	5	3	5	2	9	3	2	0	5	5	0	6	4	5	0	2	12	3	16	10	1	1	2	4	2	1
ENSONIG00000010432	GL831134.1;GL831134.1;GL831134.1;GL831134.1;GL831134.1;GL831134.1;GL831134.1	10552061;10554140;10554569;10559461;10564966;10567780;10570269	10552254;10554429;10554635;10559561;10565043;10567944;10570799	-;-;-;-;-;-;-	1426	567	902	404	624	639	808	416	683	634	624	733	478	825	807	626	528	585	589	385	471	501	886	792	810	520	570	518	547	273	496
ENSONIG00000010434	GL831134.1;GL831134.1;GL831134.1;GL831134.1;GL831134.1	10575877;10577870;10578289;10579127;10579994	10576311;10578179;10578484;10579336;10582603	+;+;+;+;+	3761	1447	1830	1029	1625	1694	2191	1127	1841	1672	1548	1594	1015	1686	1821	2063	1435	1897	1420	1168	1285	1273	1372	1740	1356	1926	1549	1241	1147	787	1318
ENSONIG00000010435	GL831134.1;GL831134.1;GL831134.1;GL831134.1;GL831134.1	10582695;10584162;10584467;10584908;10587473	10583825;10584242;10584660;10585103;10587846	-;-;-;-;-	1976	1723	2571	1216	2425	2417	3104	1797	2678	2276	1874	2582	1694	2414	2446	3372	2214	2424	1805	1341	1774	2238	2208	2456	2155	2794	2045	1793	1445	1002	1738
ENSONIG00000010437	GL831134.1;GL831134.1;GL831134.1;GL831134.1;GL831134.1;GL831134.1;GL831134.1;GL831134.1;GL831134.1;GL831134.1;GL831134.1;GL831134.1;GL831134.1	10588440;10589551;10589941;10590222;10590486;10591067;10591298;10591619;10591966;10592652;10592910;10593123;10593556	10588578;10589655;10590105;10590302;10590635;10591200;10591383;10591711;10592090;10592702;10592999;10593233;10596864	+;+;+;+;+;+;+;+;+;+;+;+;+	4639	1921	2261	1559	2069	2159	2660	1706	2322	1867	2190	1749	1788	1906	2579	3023	2110	2413	1742	1564	1758	1652	1607	1921	1691	2309	1824	1645	1744	1090	1858
ENSONIG00000021436	GL831134.1	10603068	10603343	+	276	1	0	10	2	0	3	1	1	0	0	1	3	2	2	12	1	0	3	3	0	0	0	2	1	0	1	0	2	0	0
ENSONIG00000010441	GL831134.1;GL831134.1;GL831134.1;GL831134.1;GL831134.1;GL831134.1;GL831134.1;GL831134.1;GL831134.1;GL831134.1;GL831134.1	10608243;10609140;10610061;10611805;10612155;10612386;10613514;10614007;10614728;10614930;10615347	10608467;10609311;10610178;10611923;10612212;10612436;10613606;10614135;10614837;10615083;10616122	+;+;+;+;+;+;+;+;+;+;+	2005	1473	2646	1295	2313	2284	3199	1710	2331	2020	1844	2051	1490	2208	2234	3052	1928	2536	1839	1440	1748	1671	1873	1943	1966	2767	1883	1646	1482	881	1646
ENSONIG00000010448	GL831134.1;GL831134.1;GL831134.1;GL831134.1;GL831134.1;GL831134.1;GL831134.1;GL831134.1	10620019;10620314;10620481;10624610;10627330;10628641;10628844;10631510	10620204;10620394;10620588;10624766;10627463;10628745;10628975;10631686	-;-;-;-;-;-;-;-	1080	124	208	68	147	114	196	115	189	148	189	158	109	209	95	188	141	172	151	120	112	100	122	191	155	222	152	152	120	70	127
ENSONIG00000010452	GL831134.1;GL831134.1;GL831134.1;GL831134.1;GL831134.1;GL831134.1;GL831134.1;GL831134.1;GL831134.1;GL831134.1;GL831134.1;GL831134.1;GL831134.1;GL831134.1;GL831134.1;GL831134.1;GL831134.1;GL831134.1;GL831134.1;GL831134.1;GL831134.1;GL831134.1;GL831134.1;GL831134.1;GL831134.1;GL831134.1;GL831134.1;GL831134.1;GL831134.1;GL831134.1;GL831134.1;GL831134.1;GL831134.1;GL831134.1;GL831134.1;GL831134.1;GL8…	10636396;10638673;10638676;10638942;10638942;10639299;10639299;10639553;10639553;10639784;10639880;10639889;10640154;10640154;10640508;10640508;10640932;10640932;10641365;10641365;10641683;10641683;10642068;10642068;10642426;10642426;10642774;10642774;10643006;10643006;10643296;10643296;10644228;10644228;10644513;10644513;10644969;10644969;10645680;10645680;10645950;10645950;10646705;10646705;106…	10638333;10638792;10638792;10639198;10639198;10639460;10639460;10639634;10639634;10639792;10640054;10640054;10640296;10640296;10640664;10640664;10641049;10641049;10641578;10641578;10641826;10641826;10642182;10642182;10642590;10642590;10642892;10642892;10643165;10643165;10643404;10643404;10644341;10644326;10644597;10644597;10645130;10645130;10645860;10645860;10646117;10646117;10646794;10646794;106…	-;-;-;-;-;-;-;-;-;-;-;-;-;-;-;-;-;-;-;-;-;-;-;-;-;-;-;-;-;-;-;-;-;-;-;-;-;-;-;-;-;-;-;-;-;-;-;-	5759	1065	1964	775	1036	1035	1628	903	1196	1450	1155	1603	614	1159	1447	1474	1133	1294	1208	950	990	846	1394	1281	1201	823	1225	1211	923	555	1014
ENSONIG00000010455	GL831134.1;GL831134.1;GL831134.1;GL831134.1;GL831134.1	10652130;10653265;10654528;10655029;10655546	10652821;10653497;10654644;10655081;10655576	-;-;-;-;-	1126	62	48	17	81	80	90	53	72	51	96	66	34	79	95	122	55	63	42	52	19	43	45	113	62	71	54	39	47	28	39
ENSONIG00000021437	GL831134.1	10657840	10658793	+	954	681	906	574	737	889	855	497	771	570	541	721	487	795	890	1109	616	655	504	407	471	681	715	830	716	1393	600	578	522	282	497
ENSONIG00000010456	GL831134.1;GL831134.1;GL831134.1;GL831134.1;GL831134.1	10659786;10664587;10665224;10666576;10669651	10663006;10664711;10665342;10666800;10669975	-;-;-;-;-	4015	9431	14835	7399	10820	11002	14881	8573	11774	10593	11202	10837	6844	10252	11850	12053	9837	11112	8881	7423	8731	8218	10703	11336	9323	15563	9372	9302	7836	4924	8075
ENSONIG00000010458	GL831134.1;GL831134.1;GL831134.1;GL831134.1;GL831134.1;GL831134.1;GL831134.1;GL831134.1;GL831134.1;GL831134.1;GL831134.1;GL831134.1;GL831134.1;GL831134.1;GL831134.1;GL831134.1;GL831134.1;GL831134.1;GL831134.1;GL831134.1;GL831134.1;GL831134.1;GL831134.1;GL831134.1;GL831134.1;GL831134.1;GL831134.1;GL831134.1;GL831134.1;GL831134.1;GL831134.1;GL831134.1	10670068;10674201;10674439;10675006;10675006;10675280;10675280;10675503;10675503;10675793;10675793;10675986;10675986;10676350;10676350;10676553;10676553;10676899;10676899;10679478;10679478;10680312;10680312;10680475;10680475;10681193;10681193;10681726;10682507;10682507;10719450;10721175	10674611;10674372;10674611;10675188;10675188;10675402;10675402;10675657;10675657;10675892;10675892;10676150;10676150;10676448;10676448;10676725;10676725;10676992;10676992;10679590;10679590;10680364;10680364;10680548;10680548;10681229;10681229;10681770;10682703;10682698;10719676;10721213	-;-;-;-;-;-;-;-;-;-;-;-;-;-;-;-;-;-;-;-;-;-;-;-;-;-;-;-;-;-;-;-	6421	247	438	279	321	295	497	192	383	413	246	231	239	435	430	404	134	405	259	339	241	343	326	329	357	666	285	237	319	157	313
ENSONIG00000010474	GL831134.1;GL831134.1;GL831134.1;GL831134.1;GL831134.1;GL831134.1;GL831134.1	10722662;10722802;10724211;10724542;10724776;10725043;10726221	10722727;10722870;10724363;10724625;10724850;10725231;10726346	-;-;-;-;-;-;-	762	405	545	302	445	459	554	345	723	343	418	566	386	450	484	792	463	533	406	319	276	352	306	453	364	1049	368	315	293	208	400
ENSONIG00000010477	GL831134.1;GL831134.1;GL831134.1;GL831134.1;GL831134.1;GL831134.1;GL831134.1;GL831134.1;GL831134.1;GL831134.1;GL831134.1;GL831134.1;GL831134.1;GL831134.1;GL831134.1;GL831134.1	10736630;10737746;10738056;10738270;10738562;10738868;10739183;10739526;10740803;10741005;10741216;10742462;10743077;10744773;10752585;10754448	10736816;10737916;10738127;10738446;10738704;10739002;10739363;10739624;10740905;10741090;10741396;10742626;10743151;10744865;10752602;10754766	-;-;-;-;-;-;-;-;-;-;-;-;-;-;-;-	2205	873	1632	625	875	869	1608	1004	1239	1172	1130	674	656	1211	1131	989	987	1279	1097	792	952	971	1183	1105	1448	637	1005	690	962	459	754
ENSONIG00000010481	GL831134.1;GL831134.1;GL831134.1;GL831134.1;GL831134.1;GL831134.1;GL831134.1;GL831134.1;GL831134.1;GL831134.1;GL831134.1;GL831134.1;GL831134.1;GL831134.1;GL831134.1;GL831134.1;GL831134.1;GL831134.1;GL831134.1;GL831134.1;GL831134.1;GL831134.1;GL831134.1;GL831134.1;GL831134.1;GL831134.1	10767337;10767844;10768377;10768653;10769973;10770473;10772901;10773232;10773558;10774632;10774904;10775182;10775598;10775866;10776396;10778154;10778543;10779126;10779708;10780722;10781052;10783134;10787518;10789439;10790253;10794687	10767759;10768033;10768513;10768775;10770208;10770894;10773058;10773341;10773680;10774733;10775069;10775314;10775739;10776074;10776497;10778163;10778578;10779258;10779809;10780931;10781127;10783294;10787599;10789511;10790341;10794718	-;-;-;-;-;-;-;-;-;-;-;-;-;-;-;-;-;-;-;-;-;-;-;-;-;-	3780	1164	1901	844	1446	1429	1587	1010	1087	1182	1374	1253	975	1363	1686	1298	1304	1235	800	684	791	1097	1500	1648	1299	616	1066	1199	922	667	889
ENSONIG00000010487	GL831134.1;GL831134.1	10799973;10800833	10800309;10802202	+;+	1707	0	0	0	9	0	11	0	9	0	5	13	3	6	0	3	8	2	0	0	0	13	2	5	4	2	1	3	5	3	0
ENSONIG00000026530	GL831134.1;GL831134.1	10804885;10808457	10805477;10808930	+;+	1067	0	0	0	0	1	0	0	0	6	0	1	5	1	0	0	0	6	1	1	0	1	1	2	2	0	0	2	1	1	1
ENSONIG00000022820	GL831134.1;GL831134.1;GL831134.1	10804885;10806665;10807310	10806344;10806993;10808071	-;-;-	2551	230	169	131	153	108	151	79	225	123	121	175	80	148	90	200	177	187	135	69	84	123	109	190	109	182	98	97	100	56	159
ENSONIG00000010488	GL831134.1;GL831134.1;GL831134.1;GL831134.1;GL831134.1;GL831134.1;GL831134.1;GL831134.1;GL831134.1;GL831134.1;GL831134.1;GL831134.1;GL831134.1;GL831134.1;GL831134.1;GL831134.1;GL831134.1;GL831134.1;GL831134.1;GL831134.1;GL831134.1;GL831134.1;GL831134.1;GL831134.1;GL831134.1;GL831134.1;GL831134.1;GL831134.1;GL831134.1;GL831134.1;GL831134.1;GL831134.1;GL831134.1	10813525;10813525;10816551;10816551;10818070;10818138;10818149;10819622;10819622;10820084;10820084;10821045;10821045;10821215;10821215;10821727;10821727;10822038;10822063;10822341;10822341;10822909;10824631;10825237;10825237;10826735;10826735;10829487;10829487;10829678;10829687;10831077;10831077	10813650;10813650;10816667;10816667;10818073;10818274;10818274;10819683;10819683;10820178;10820178;10821130;10821130;10821255;10821255;10821917;10821916;10822208;10822208;10822433;10822457;10822985;10824664;10825335;10825335;10826839;10826839;10829570;10829570;10829864;10829864;10831282;10831282	+;+;+;+;+;+;+;+;+;+;+;+;+;+;+;+;+;+;+;+;+;+;+;+;+;+;+;+;+;+;+;+;+	1939	743	1430	544	1009	1114	1930	896	1039	1006	987	881	706	1268	1210	1478	975	1269	920	796	831	937	1158	973	1202	1978	915	974	818	517	685
ENSONIG00000010491	GL831134.1;GL831134.1;GL831134.1	10838043;10839691;10839857	10838667;10839765;10843603	+;+;+	4447	398	606	239	424	592	662	368	542	515	470	450	353	408	434	693	449	587	514	414	355	418	485	481	406	528	336	358	365	252	330
ENSONIG00000010492	GL831134.1;GL831134.1;GL831134.1;GL831134.1;GL831134.1;GL831134.1;GL831134.1	10848252;10851058;10851315;10851715;10851954;10852736;10853477	10848474;10851179;10851381;10851852;10852070;10852882;10854119	+;+;+;+;+;+;+	1457	176	558	227	256	311	319	152	357	379	222	223	160	279	256	355	155	350	280	186	172	283	283	279	220	375	290	328	210	94	210
ENSONIG00000010495	GL831134.1;GL831134.1;GL831134.1	10858261;10858774;10860184	10858349;10859008;10860297	+;+;+	438	2365	3530	1666	3718	3584	4289	2990	4668	2962	2609	7008	4530	5124	4173	6738	4989	3484	3252	1701	2257	4197	4927	4648	5213	2912	3301	1850	2469	1472	2342
ENSONIG00000010497	GL831134.1;GL831134.1;GL831134.1;GL831134.1;GL831134.1;GL831134.1;GL831134.1;GL831134.1;GL831134.1;GL831134.1;GL831134.1;GL831134.1;GL831134.1;GL831134.1;GL831134.1;GL831134.1;GL831134.1;GL831134.1;GL831134.1;GL831134.1;GL831134.1	10860710;10862241;10862468;10862913;10863290;10865839;10866254;10867459;10867690;10867864;10868187;10868462;10868760;10869531;10870197;10871907;10872226;10872460;10873057;10873886;10874905	10860931;10862324;10862706;10863025;10863463;10866010;10866364;10867587;10867751;10867964;10868364;10868621;10868839;10869683;10870332;10872052;10872372;10872612;10873199;10873997;10876064	+;+;+;+;+;+;+;+;+;+;+;+;+;+;+;+;+;+;+;+;+	3975	933	1244	698	1067	1000	1752	889	1169	1036	1151	1349	774	1253	1320	1004	1078	1221	993	783	798	901	1070	1208	944	1148	1030	798	859	629	873
ENSONIG00000010501	GL831134.1;GL831134.1;GL831134.1;GL831134.1;GL831134.1;GL831134.1;GL831134.1	10879717;10880008;10880460;10880647;10883083;10883295;10884238	10879901;10880292;10880555;10880760;10883176;10883405;10884931	-;-;-;-;-;-;-	1579	278	403	313	356	385	492	242	535	474	467	346	316	379	304	518	330	658	452	240	312	292	288	322	272	552	407	328	247	204	351
ENSONIG00000010503	GL831134.1;GL831134.1	10893715;10895939	10894010;10896104	-;-	462	0	0	0	0	0	0	0	0	0	1	0	0	0	3	0	0	0	0	1	0	0	2	0	0	0	0	0	0	0	0
ENSONIG00000010504	GL831134.1;GL831134.1;GL831134.1;GL831134.1	10901660;10902751;10903894;10905502	10902652;10903384;10904019;10906723	+;+;+;+	2975	3	3	1	0	0	1	0	1	0	0	0	0	1	0	6	4	2	1	0	4	0	0	2	2	0	0	0	1	0	1
ENSONIG00000024898	GL831134.1;GL831134.1	10941542;10943412	10941727;10943555	-;-	330	0	0	1	0	0	0	0	2	0	0	4	0	0	0	0	0	1	0	0	0	0	2	0	0	0	0	0	0	2	2
ENSONIG00000010506	GL831134.1;GL831134.1;GL831134.1;GL831134.1;GL831134.1;GL831134.1;GL831134.1;GL831134.1;GL831134.1	10975723;10979350;10983576;10986057;10997374;10997848;10999405;11002300;11004935	10976006;10979823;10983671;10986475;10997515;10997958;10999532;11002369;11005240	+;+;+;+;+;+;+;+;+	2030	1669	2568	1425	1938	1801	2628	1351	2127	1860	1961	1665	1414	1987	2224	2386	1679	2074	1379	1324	1553	1758	1805	2061	1962	2105	1741	1247	1533	1153	1763
ENSONIG00000010508	GL831134.1;GL831134.1;GL831134.1;GL831134.1;GL831134.1;GL831134.1;GL831134.1;GL831134.1;GL831134.1;GL831134.1;GL831134.1;GL831134.1;GL831134.1	11012829;11013922;11014207;11015958;11016234;11016337;11016402;11016657;11016657;11016908;11016908;11017267;11017267	11013212;11015094;11015114;11015987;11016248;11016524;11016524;11016828;11016828;11016958;11016958;11017383;11017784	+;+;+;+;+;+;+;+;+;+;+;+;+	2551	62	9	5	36	39	38	6	36	65	54	71	28	61	38	84	53	40	18	17	32	32	33	23	63	41	19	29	31	31	36
ENSONIG00000010510	GL831134.1;GL831134.1;GL831134.1;GL831134.1;GL831134.1;GL831134.1;GL831134.1;GL831134.1;GL831134.1;GL831134.1;GL831134.1;GL831134.1;GL831134.1;GL831134.1;GL831134.1;GL831134.1;GL831134.1;GL831134.1;GL831134.1;GL831134.1	11019180;11020433;11020461;11021613;11021613;11022038;11022038;11023780;11024087;11026142;11026142;11026464;11026546;11026715;11027455;11027455;11027775;11027775;11029216;11029216	11019534;11021009;11021009;11021816;11021816;11022199;11022199;11023827;11024140;11026296;11026296;11026509;11026803;11026803;11027626;11027626;11027816;11027816;11029317;11029317	+;+;+;+;+;+;+;+;+;+;+;+;+;+;+;+;+;+;+;+	2175	29	64	18	67	45	59	42	50	22	54	34	15	36	35	33	21	23	47	27	13	39	41	9	29	64	30	18	30	8	40
ENSONIG00000010512	GL831134.1;GL831134.1;GL831134.1;GL831134.1;GL831134.1	11031907;11032877;11033283;11034943;11036382	11032181;11033123;11033614;11035037;11037178	-;-;-;-;-	1746	398	783	335	594	625	776	400	559	571	536	497	296	476	598	611	440	587	437	384	420	430	573	641	511	618	503	558	331	253	341
ENSONIG00000010515	GL831134.1;GL831134.1;GL831134.1;GL831134.1;GL831134.1;GL831134.1;GL831134.1;GL831134.1;GL831134.1;GL831134.1;GL831134.1	11057486;11057486;11058395;11058395;11059796;11060147;11060179;11060324;11060324;11061860;11062095	11058309;11058309;11058795;11058795;11059812;11060213;11060213;11061057;11061033;11061950;11062471	+;+;+;+;+;+;+;+;+;+;+	2511	25	77	50	62	59	101	70	59	23	90	7	26	74	94	94	55	44	49	25	28	35	51	50	67	49	50	75	44	22	23
ENSONIG00000010518	GL831134.1;GL831134.1;GL831134.1;GL831134.1;GL831134.1;GL831134.1;GL831134.1;GL831134.1;GL831134.1;GL831134.1;GL831134.1;GL831134.1;GL831134.1;GL831134.1;GL831134.1;GL831134.1;GL831134.1;GL831134.1;GL831134.1;GL831134.1;GL831134.1;GL831134.1;GL831134.1;GL831134.1;GL831134.1;GL831134.1;GL831134.1;GL831134.1;GL831134.1;GL831134.1;GL831134.1;GL831134.1;GL831134.1;GL831134.1;GL831134.1;GL831134.1;GL8…	11070769;11073039;11075877;11075881;11078664;11078664;11080130;11080130;11080410;11080410;11080800;11080800;11081073;11081073;11083510;11083510;11084401;11084401;11084975;11084975;11085277;11085277;11085436;11085436;11086295;11086295;11087032;11087035;11087285;11087285;11087584;11087584;11087920;11087920;11088418;11088418;11088847	11070916;11073343;11075991;11075991;11078796;11078796;11080268;11080268;11080506;11080506;11080916;11080916;11081200;11081200;11083671;11083671;11084553;11084553;11085101;11085101;11085332;11085332;11085510;11085510;11086792;11086792;11087193;11087193;11087476;11087476;11087715;11087715;11088030;11088030;11088783;11089080;11088900	+;+;+;+;+;+;+;+;+;+;+;+;+;+;+;+;+;+;+;+;+;+;+;+;+;+;+;+;+;+;+;+;+;+;+;+;+	3513	572	890	383	598	548	927	407	775	621	712	358	441	644	711	769	530	722	714	443	481	547	626	788	666	577	484	428	503	341	595
ENSONIG00000010522	GL831134.1;GL831134.1;GL831134.1;GL831134.1;GL831134.1	11092505;11092735;11094487;11094708;11095033	11092609;11092796;11094538;11094788;11095041	-;-;-;-;-	309	204	277	175	269	247	348	225	404	225	202	253	186	311	326	489	216	235	254	167	230	210	267	205	188	379	229	223	211	114	217
ENSONIG00000010523	GL831134.1;GL831134.1	11100990;11103836	11102881;11104034	-;-	2091	351	520	346	605	623	698	375	631	506	464	630	271	618	600	757	566	524	463	312	404	523	503	496	423	901	490	333	362	268	438
ENSONIG00000010524	GL831134.1;GL831134.1;GL831134.1;GL831134.1;GL831134.1;GL831134.1;GL831134.1;GL831134.1;GL831134.1;GL831134.1;GL831134.1	11106001;11108845;11108854;11109117;11109773;11109773;11110096;11110096;11110428;11110428;11111087	11106560;11109674;11109068;11109674;11109943;11109943;11110312;11110312;11110564;11113495;11111117	+;+;+;+;+;+;+;+;+;+;+	4846	3642	814	1569	1909	1932	4478	2408	1899	460	3361	1861	1782	1793	3276	3301	3270	1770	1500	1511	1597	1497	584	650	1420	3113	1473	344	2243	1465	1335
ENSONIG00000010525	GL831134.1;GL831134.1;GL831134.1;GL831134.1;GL831134.1;GL831134.1;GL831134.1;GL831134.1;GL831134.1;GL831134.1;GL831134.1;GL831134.1;GL831134.1;GL831134.1;GL831134.1;GL831134.1;GL831134.1;GL831134.1;GL831134.1;GL831134.1;GL831134.1;GL831134.1;GL831134.1;GL831134.1;GL831134.1;GL831134.1;GL831134.1;GL831134.1;GL831134.1;GL831134.1;GL831134.1;GL831134.1;GL831134.1;GL831134.1;GL831134.1;GL831134.1;GL8…	11115017;11117513;11117559;11117755;11117755;11118077;11118077;11118317;11118317;11118854;11118854;11119031;11119031;11119230;11119230;11119481;11119481;11120283;11120416;11120488;11120686;11120773;11120910;11121799;11122399;11122557;11123252;11123562;11123891;11124844;11124851;11124950;11125097;11125159;11125550;11125550;11126348;11126372;11127101;11127101;11129309;11129309;11130264;11130264;111…	11115203;11117657;11117657;11117930;11117930;11118191;11118191;11118510;11118510;11118903;11118903;11119134;11119134;11119367;11119367;11119793;11119707;11120316;11120654;11120654;11120744;11121440;11121440;11121979;11122447;11122740;11123256;11123611;11123966;11124937;11124958;11124958;11125301;11125270;11125725;11125725;11126585;11126585;11127180;11127180;11129364;11129364;11130372;11130372;111…	+;+;+;+;+;+;+;+;+;+;+;+;+;+;+;+;+;+;+;+;+;+;+;+;+;+;+;+;+;+;+;+;+;+;+;+;+;+;+;+;+;+;+;+;+;+;+;+;+;+;+;+;+;+	6132	625	1053	542	700	822	1021	552	737	705	792	861	675	942	832	1049	690	710	632	544	806	670	826	830	721	923	712	708	654	427	501
ENSONIG00000010528	GL831134.1;GL831134.1;GL831134.1;GL831134.1;GL831134.1;GL831134.1;GL831134.1;GL831134.1;GL831134.1;GL831134.1;GL831134.1	11158848;11165550;11166818;11168103;11173697;11178902;11179050;11181530;11192174;11194069;11196920	11158995;11165591;11166860;11168195;11173791;11178965;11179145;11181716;11192320;11194215;11197009	+;+;+;+;+;+;+;+;+;+;+	1152	409	312	235	340	397	606	349	321	143	400	401	293	385	533	499	398	364	263	192	225	312	243	265	316	384	265	134	346	179	217
ENSONIG00000010531	GL831134.1;GL831134.1;GL831134.1;GL831134.1;GL831134.1	11204032;11205191;11217309;11219269;11219802	11204566;11205522;11217370;11219479;11221997	+;+;+;+;+	3336	12	11	22	10	26	13	27	40	19	30	47	11	20	10	40	30	20	13	6	19	21	8	19	22	1	18	14	5	6	15
ENSONIG00000010532	GL831134.1;GL831134.1	11223362;11223776	11223643;11224513	-;-	1020	14	16	17	18	14	16	13	27	5	3	30	8	26	7	19	10	12	11	15	14	21	8	38	30	3	17	19	14	13	14
ENSONIG00000022374	GL831134.1;GL831134.1	11234177;11237022	11234281;11237205	-;-	289	0	0	0	0	0	0	0	0	0	0	0	0	0	0	0	0	0	0	0	0	0	0	0	0	0	0	0	0	0	0
ENSONIG00000010533	GL831134.1;GL831134.1;GL831134.1;GL831134.1;GL831134.1;GL831134.1;GL831134.1;GL831134.1;GL831134.1;GL831134.1;GL831134.1;GL831134.1;GL831134.1;GL831134.1;GL831134.1;GL831134.1;GL831134.1;GL831134.1;GL831134.1;GL831134.1	11257950;11258531;11258800;11258964;11259003;11259003;11259084;11259087;11259087;11259508;11259508;11259508;11259508;11259895;11259895;11259895;11259895;11260586;11260586;11260586	11258668;11258668;11258835;11259002;11259177;11259062;11259177;11259177;11259177;11259623;11259623;11259623;11259623;11260552;11260552;11260552;11262045;11260701;11260695;11260701	+;+;+;+;+;+;+;+;+;+;+;+;+;+;+;+;+;+;+;+	3236	1	0	0	0	0	0	0	2	2	0	0	1	1	1	0	1	2	1	0	0	5	0	0	0	2	0	0	1	0	0
ENSONIG00000022999	GL831134.1;GL831134.1	11266682;11268680	11266835;11268872	-;-	347	0	0	0	0	0	0	0	0	0	0	0	0	0	0	0	0	0	0	0	0	0	0	0	0	0	0	0	0	0	0
ENSONIG00000010534	GL831134.1;GL831134.1;GL831134.1;GL831134.1;GL831134.1;GL831134.1;GL831134.1;GL831134.1;GL831134.1;GL831134.1;GL831134.1;GL831134.1;GL831134.1	11268972;11269358;11270086;11270373;11271407;11272591;11273512;11273827;11274557;11274760;11274993;11277562;11278064	11269130;11269919;11270209;11270498;11271560;11272705;11273618;11273966;11274663;11274847;11275138;11277753;11278516	+;+;+;+;+;+;+;+;+;+;+;+;+	2473	2	0	3	8	11	6	1	1	3	0	5	1	0	1	0	0	4	2	4	0	4	1	5	0	0	11	3	0	1	3
ENSONIG00000010536	GL831134.1;GL831134.1;GL831134.1;GL831134.1	11279118;11279226;11281290;11281742	11279150;11279387;11281322;11281789	-;-;-;-	276	222	352	119	195	255	374	182	300	253	218	348	160	277	322	417	317	280	239	146	142	256	282	262	217	259	259	162	163	123	167
ENSONIG00000010537	GL831134.1;GL831134.1;GL831134.1;GL831134.1;GL831134.1;GL831134.1;GL831134.1;GL831134.1;GL831134.1;GL831134.1;GL831134.1;GL831134.1;GL831134.1;GL831134.1;GL831134.1;GL831134.1;GL831134.1	11282074;11282080;11283488;11283488;11283866;11283967;11283967;11284202;11284202;11284480;11284480;11284766;11284766;11285046;11285046;11285310;11285310	11282166;11282166;11283707;11283707;11283895;11284114;11284114;11284356;11284356;11284640;11284640;11284890;11284890;11285178;11285178;11285453;11288525	+;+;+;+;+;+;+;+;+;+;+;+;+;+;+;+;+	4281	155	223	148	226	166	275	97	198	199	144	299	139	141	206	152	125	246	169	97	150	189	119	126	156	192	165	151	114	93	133
ENSONIG00000010542	GL831134.1;GL831134.1;GL831134.1;GL831134.1;GL831134.1	11291181;11293438;11294386;11295129;11298519	11293324;11293837;11294564;11295298;11298813	-;-;-;-;-	3188	0	0	2	37	0	0	0	0	0	0	0	0	0	0	0	0	15	0	0	0	0	0	0	0	0	0	0	0	8	3
ENSONIG00000010543	GL831134.1;GL831134.1;GL831134.1;GL831134.1	11347675;11348741;11348964;11349459	11348189;11348842;11349189;11349880	+;+;+;+	1265	44	118	54	131	48	97	48	98	66	72	88	39	75	89	120	66	70	55	40	43	64	68	115	100	130	69	65	62	34	77
ENSONIG00000010546	GL831134.1;GL831134.1	11356292;11357161	11356417;11357253	-;-	219	361	523	283	354	370	506	277	484	314	325	371	263	373	397	467	332	493	312	285	332	293	317	473	358	700	370	292	297	189	337
ENSONIG00000010548	GL831134.1;GL831134.1;GL831134.1;GL831134.1;GL831134.1;GL831134.1;GL831134.1;GL831134.1;GL831134.1;GL831134.1;GL831134.1;GL831134.1;GL831134.1;GL831134.1	11458065;11458534;11458923;11459177;11459398;11460069;11463000;11467140;11470137;11475325;11482189;11483429;11486786;11490966	11458174;11458551;11459066;11459255;11459541;11460169;11463060;11467308;11470273;11475351;11482323;11483553;11487058;11491071	-;-;-;-;-;-;-;-;-;-;-;-;-;-	1629	304	143	109	245	213	400	230	237	128	334	306	295	231	287	359	325	209	197	165	115	214	152	202	279	194	160	112	170	193	173
ENSONIG00000010553	GL831134.1;GL831134.1;GL831134.1;GL831134.1;GL831134.1;GL831134.1;GL831134.1;GL831134.1;GL831134.1;GL831134.1;GL831134.1;GL831134.1;GL831134.1;GL831134.1;GL831134.1;GL831134.1;GL831134.1	11493771;11494897;11495056;11497570;11498199;11498463;11499682;11499954;11500179;11500495;11500907;11501203;11501714;11501997;11504382;11505542;11507756	11494659;11494957;11495133;11497685;11498373;11498633;11499772;11500087;11500394;11500583;11501039;11501292;11501863;11502158;11504536;11505729;11508014	-;-;-;-;-;-;-;-;-;-;-;-;-;-;-;-;-	3157	572	687	411	630	550	1020	570	712	660	669	692	402	880	799	765	646	938	678	559	557	559	778	928	651	627	684	558	454	355	521
ENSONIG00000010557	GL831134.1;GL831134.1;GL831134.1;GL831134.1;GL831134.1;GL831134.1;GL831134.1;GL831134.1;GL831134.1;GL831134.1;GL831134.1;GL831134.1;GL831134.1;GL831134.1;GL831134.1;GL831134.1;GL831134.1;GL831134.1;GL831134.1;GL831134.1;GL831134.1;GL831134.1;GL831134.1;GL831134.1;GL831134.1;GL831134.1;GL831134.1;GL831134.1;GL831134.1;GL831134.1;GL831134.1;GL831134.1;GL831134.1;GL831134.1;GL831134.1;GL831134.1;GL8…	11519720;11520905;11520922;11521131;11521359;11521764;11521764;11523057;11523683;11523716;11524330;11525740;11525740;11525987;11525987;11526214;11526214;11526536;11526536;11526933;11527073;11527073;11527912;11527912;11528174;11528174;11528404;11528404;11528633;11528633;11528923;11528923;11529144;11529144;11529523;11529523;11529938;11530096;11530238;11530347;11530487;11530497;11530932;11530932;115…	11520442;11521668;11521034;11521181;11521668;11522207;11522207;11523194;11523817;11523844;11524386;11525877;11525877;11526086;11526086;11526427;11526427;11526706;11526699;11526943;11527215;11527215;11528079;11528079;11528290;11528290;11528481;11528481;11528767;11528767;11529054;11529054;11529254;11529254;11529809;11529740;11529966;11530152;11530325;11530455;11530776;11530776;11531053;11531053;115…	-;-;-;-;-;-;-;-;-;-;-;-;-;-;-;-;-;-;-;-;-;-;-;-;-;-;-;-;-;-;-;-;-;-;-;-;-;-;-;-;-;-;-;-;-;-;-;-;-;-;-;-;-;-	5908	81	223	84	121	88	113	74	150	90	148	140	79	82	91	140	87	153	120	95	117	63	98	139	146	81	114	124	122	90	88
ENSONIG00000010559	GL831134.1;GL831134.1;GL831134.1;GL831134.1;GL831134.1;GL831134.1;GL831134.1;GL831134.1;GL831134.1;GL831134.1;GL831134.1;GL831134.1;GL831134.1;GL831134.1	11538547;11539109;11539404;11539631;11542731;11543025;11543442;11543820;11544228;11544422;11545039;11545296;11546520;11546750	11538922;11539228;11539462;11539757;11542901;11543092;11543565;11543888;11544323;11544600;11545139;11545406;11546601;11546959	-;-;-;-;-;-;-;-;-;-;-;-;-;-	1893	59	29	17	35	31	45	23	36	37	43	33	59	34	45	56	27	12	18	12	31	37	14	28	47	14	27	26	24	19	15
ENSONIG00000010561	GL831134.1;GL831134.1;GL831134.1;GL831134.1;GL831134.1;GL831134.1	11548922;11553977;11554245;11555824;11556092;11556313	11548975;11554111;11554352;11556000;11556223;11556993	+;+;+;+;+;+	1287	452	560	245	515	429	718	395	512	395	432	342	284	435	488	577	398	474	442	312	393	408	370	399	421	445	435	356	373	219	360
ENSONIG00000010566	GL831134.1;GL831134.1;GL831134.1;GL831134.1;GL831134.1;GL831134.1;GL831134.1;GL831134.1	11559109;11559351;11560045;11561533;11561865;11562082;11562288;11562674	11559211;11559439;11560222;11561735;11561999;11562197;11562357;11562697	-;-;-;-;-;-;-;-	918	386	771	257	687	660	872	430	645	601	486	965	528	786	785	962	648	686	545	424	359	564	717	653	622	904	487	458	386	261	469
ENSONIG00000021754	GL831134.1	11561221	11561320	-	100	1	1	0	5	1	2	0	1	0	2	2	2	2	2	6	0	1	0	1	0	2	4	3	3	0	2	5	1	0	3
ENSONIG00000026189	GL831134.1;GL831134.1	11567227;11568352	11568156;11568750	-;-	1329	0	0	0	0	0	8	0	0	0	0	0	0	0	3	0	0	0	0	0	7	0	0	0	2	0	0	0	0	0	0
ENSONIG00000010573	GL831134.1;GL831134.1;GL831134.1;GL831134.1;GL831134.1;GL831134.1;GL831134.1	11573614;11573783;11573913;11574703;11575304;11575641;11575899	11573740;11573820;11574072;11575100;11575441;11575806;11576077	+;+;+;+;+;+;+	1206	6	8	9	2	2	9	6	3	6	2	12	10	2	12	2	2	14	8	11	14	32	6	12	6	2	14	0	3	0	4
ENSONIG00000010577	GL831134.1;GL831134.1;GL831134.1;GL831134.1;GL831134.1;GL831134.1;GL831134.1;GL831134.1;GL831134.1;GL831134.1;GL831134.1;GL831134.1;GL831134.1;GL831134.1;GL831134.1;GL831134.1;GL831134.1;GL831134.1;GL831134.1;GL831134.1;GL831134.1;GL831134.1;GL831134.1;GL831134.1;GL831134.1;GL831134.1	11577010;11577019;11577470;11578583;11580924;11580924;11582875;11582875;11583163;11583163;11583361;11584056;11584327;11584485;11584485;11584625;11584625;11584810;11584810;11584969;11584969;11586071;11586071;11586312;11586312;11586561	11577148;11577148;11577488;11578601;11580973;11580973;11582955;11582955;11583254;11583254;11583833;11584399;11584399;11584520;11584520;11584713;11584713;11584875;11584875;11585067;11585067;11586185;11586185;11586357;11586361;11586615	-;-;-;-;-;-;-;-;-;-;-;-;-;-;-;-;-;-;-;-;-;-;-;-;-;-	1727	118	253	99	134	197	305	148	203	152	164	208	87	132	223	294	163	215	139	92	136	119	152	182	172	372	156	143	132	68	82
ENSONIG00000010582	GL831134.1;GL831134.1;GL831134.1;GL831134.1;GL831134.1;GL831134.1;GL831134.1;GL831134.1;GL831134.1;GL831134.1;GL831134.1;GL831134.1;GL831134.1;GL831134.1;GL831134.1;GL831134.1;GL831134.1;GL831134.1	11587005;11588446;11588655;11588864;11589116;11589537;11589747;11590093;11590292;11590749;11590932;11591117;11591278;11591458;11592095;11592309;11592668;11592842	11587084;11588571;11588768;11588972;11589404;11589636;11589928;11590146;11590322;11590838;11590973;11591190;11591362;11591567;11592158;11592444;11592738;11596001	+;+;+;+;+;+;+;+;+;+;+;+;+;+;+;+;+;+	4917	335	433	285	361	418	476	308	551	288	454	419	285	433	451	540	352	556	410	206	294	331	380	397	277	522	351	266	286	209	306
ENSONIG00000010587	GL831134.1;GL831134.1;GL831134.1;GL831134.1;GL831134.1;GL831134.1;GL831134.1;GL831134.1;GL831134.1;GL831134.1;GL831134.1;GL831134.1	11594455;11594702;11595760;11596216;11596560;11598131;11598522;11599001;11599308;11600164;11600405;11601986	11594665;11594909;11595909;11596298;11596726;11598237;11598760;11599143;11599401;11600299;11600503;11602085	-;-;-;-;-;-;-;-;-;-;-;-	1737	13	35	33	9	9	12	8	29	17	14	19	11	25	37	38	11	17	7	27	6	11	36	26	26	24	8	13	11	9	28
ENSONIG00000010590	GL831134.1;GL831134.1;GL831134.1;GL831134.1;GL831134.1;GL831134.1;GL831134.1;GL831134.1;GL831134.1;GL831134.1;GL831134.1;GL831134.1;GL831134.1;GL831134.1;GL831134.1;GL831134.1;GL831134.1;GL831134.1;GL831134.1;GL831134.1;GL831134.1;GL831134.1;GL831134.1;GL831134.1;GL831134.1;GL831134.1;GL831134.1;GL831134.1;GL831134.1;GL831134.1;GL831134.1;GL831134.1;GL831134.1;GL831134.1;GL831134.1;GL831134.1	11605559;11605715;11605999;11606633;11608349;11608564;11608790;11609253;11609444;11610191;11611226;11612619;11612840;11613045;11613229;11613546;11613727;11613996;11614147;11614408;11614599;11615976;11616965;11617108;11617312;11617598;11618088;11618317;11618716;11618987;11619147;11619607;11620394;11621055;11621244;11623189	11605627;11605758;11606063;11606715;11608473;11608627;11608965;11609356;11609601;11610274;11611311;11612753;11612937;11613092;11613335;11613637;11613807;11614043;11614280;11614502;11614744;11616077;11617008;11617196;11617512;11617753;11618165;11618468;11618848;11619057;11619188;11619953;11620706;11621170;11621342;11624121	-;-;-;-;-;-;-;-;-;-;-;-;-;-;-;-;-;-;-;-;-;-;-;-;-;-;-;-;-;-;-;-;-;-;-;-	4918	21	11	8	19	9	0	25	15	6	29	67	11	21	97	19	22	35	10	9	20	38	7	19	24	16	4	12	26	19	31
ENSONIG00000010593	GL831134.1;GL831134.1;GL831134.1;GL831134.1;GL831134.1;GL831134.1;GL831134.1	11623138;11627809;11632773;11634311;11634547;11635974;11636184	11624050;11630248;11633266;11634411;11634560;11636076;11636846	+;+;+;+;+;+;+	4728	1238	2138	1013	1614	1553	2163	1128	2202	1418	1447	1836	980	1582	1756	2132	1595	1687	1331	1088	1316	1187	1463	1847	1496	2787	1371	1463	1484	625	1247
ENSONIG00000010595	GL831134.1;GL831134.1	11648143;11648482	11648179;11650955	-;-	2511	469	539	340	412	363	546	412	606	454	359	246	340	474	457	678	307	478	396	336	290	307	278	448	419	380	486	421	233	259	366
ENSONIG00000010596	GL831134.1;GL831134.1;GL831134.1;GL831134.1;GL831134.1;GL831134.1;GL831134.1;GL831134.1;GL831134.1;GL831134.1;GL831134.1;GL831134.1;GL831134.1;GL831134.1	11661116;11666143;11666252;11666252;11667638;11667638;11669777;11669777;11670543;11670543;11671006;11671006;11671870;11671870	11661265;11666159;11666364;11666364;11667771;11667771;11669923;11669923;11670672;11670672;11671287;11671287;11672003;11674041	+;+;+;+;+;+;+;+;+;+;+;+;+;+	3145	1036	1498	743	1206	1181	1657	828	1442	1125	1071	1508	903	1237	1286	1725	1026	1353	1153	874	1010	944	1108	1212	1030	2152	1113	866	879	511	967
ENSONIG00000010599	GL831134.1;GL831134.1;GL831134.1;GL831134.1;GL831134.1;GL831134.1;GL831134.1;GL831134.1;GL831134.1;GL831134.1;GL831134.1;GL831134.1;GL831134.1;GL831134.1;GL831134.1;GL831134.1;GL831134.1;GL831134.1;GL831134.1;GL831134.1;GL831134.1;GL831134.1;GL831134.1;GL831134.1	11674304;11674596;11674757;11674965;11675291;11675453;11675612;11675881;11676167;11676604;11677177;11677653;11678046;11679809;11680077;11680405;11680662;11680707;11681601;11681655;11684764;11688747;11689061;11691008	11674507;11674676;11674864;11675107;11675367;11675515;11675788;11675972;11676242;11676740;11677303;11677809;11678121;11679952;11680186;11680631;11680679;11680758;11681641;11681848;11684918;11688882;11689225;11691055	-;-;-;-;-;-;-;-;-;-;-;-;-;-;-;-;-;-;-;-;-;-;-;-	2808	55	98	52	136	59	80	64	132	59	72	76	51	98	74	143	61	101	129	70	97	77	78	302	97	93	72	54	46	33	53
ENSONIG00000010601	GL831134.1;GL831134.1;GL831134.1;GL831134.1;GL831134.1;GL831134.1;GL831134.1	11706531;11708694;11710825;11711677;11712057;11712239;11734762	11706754;11708851;11710922;11711815;11712142;11712489;11734885	-;-;-;-;-;-;-	1080	462	711	283	541	547	777	464	681	433	467	461	419	547	591	931	640	571	507	420	462	477	458	581	552	593	516	459	422	252	395
ENSONIG00000010603	GL831134.1;GL831134.1;GL831134.1;GL831134.1;GL831134.1	11743800;11744110;11744313;11745758;11746845	11743926;11744223;11744451;11745922;11747197	-;-;-;-;-	898	0	0	0	0	0	0	2	0	0	0	0	1	0	0	0	0	0	0	0	0	1	0	0	0	1	1	0	0	0	0
ENSONIG00000021438	GL831134.1	11748880	11749605	-	726	0	5	0	0	0	0	3	0	0	2	1	0	2	0	0	0	0	0	0	0	0	0	0	0	0	0	0	0	0	0
ENSONIG00000010605	GL831134.1;GL831134.1;GL831134.1;GL831134.1;GL831134.1;GL831134.1;GL831134.1;GL831134.1;GL831134.1;GL831134.1;GL831134.1;GL831134.1;GL831134.1	11759236;11760281;11760995;11763198;11763382;11763739;11763994;11764370;11765046;11765354;11766496;11766934;11767169	11759476;11760323;11761109;11763284;11763505;11763873;11764111;11764471;11765191;11765437;11766556;11767028;11769309	+;+;+;+;+;+;+;+;+;+;+;+;+	3492	1582	2545	1227	2478	1792	2506	1324	2322	1993	1599	2042	1368	1944	2423	2549	1722	2171	1754	1381	1397	1583	1806	1965	1552	2414	1806	1618	1462	978	1654
ENSONIG00000010611	GL831134.1;GL831134.1;GL831134.1;GL831134.1;GL831134.1;GL831134.1;GL831134.1;GL831134.1;GL831134.1;GL831134.1;GL831134.1	11770321;11770957;11771757;11771904;11772130;11772699;11773010;11774481;11774706;11774861;11775802	11770862;11771093;11771828;11772009;11772275;11772884;11773167;11774589;11774762;11775091;11776222	-;-;-;-;-;-;-;-;-;-;-	2165	749	1132	527	835	859	1149	716	1062	848	710	1175	668	1006	1079	1360	865	846	813	568	631	736	934	1047	1003	813	902	679	626	419	642
ENSONIG00000010616	GL831134.1;GL831134.1;GL831134.1;GL831134.1;GL831134.1;GL831134.1;GL831134.1;GL831134.1;GL831134.1;GL831134.1;GL831134.1;GL831134.1;GL831134.1;GL831134.1;GL831134.1;GL831134.1;GL831134.1;GL831134.1	11777486;11778095;11778143;11778503;11778503;11780401;11780955;11780961;11781189;11781189;11783356;11783356;11783782;11783782;11784436;11784436;11784952;11784952	11777512;11778323;11778323;11778684;11778701;11780440;11781052;11781052;11781359;11781359;11783404;11783404;11783798;11783798;11784511;11784511;11785083;11785083	+;+;+;+;+;+;+;+;+;+;+;+;+;+;+;+;+;+	1038	1090	1328	677	1024	1080	1692	878	1240	928	1006	1061	865	1103	1170	1621	999	1221	1016	800	862	779	883	934	1069	1491	958	821	764	553	792
ENSONIG00000010618	GL831134.1;GL831134.1;GL831134.1;GL831134.1;GL831134.1;GL831134.1;GL831134.1;GL831134.1;GL831134.1;GL831134.1;GL831134.1;GL831134.1;GL831134.1;GL831134.1;GL831134.1;GL831134.1;GL831134.1;GL831134.1;GL831134.1;GL831134.1;GL831134.1;GL831134.1;GL831134.1;GL831134.1;GL831134.1;GL831134.1;GL831134.1;GL831134.1	11792362;11792362;11796098;11796098;11796457;11796457;11797248;11797248;11797458;11797551;11797565;11797908;11797908;11799990;11800096;11800380;11800970;11801027;11801352;11801352;11801536;11801536;11801835;11801835;11802538;11802538;11802742;11802742	11792528;11792528;11796191;11796191;11796572;11796572;11797386;11797386;11797467;11797718;11797718;11798018;11798018;11800073;11800176;11800523;11801114;11801114;11801431;11801431;11801628;11801628;11801993;11801993;11802632;11802632;11802801;11803985	+;+;+;+;+;+;+;+;+;+;+;+;+;+;+;+;+;+;+;+;+;+;+;+;+;+;+;+	2930	1829	2166	1227	1645	1292	2493	1439	1722	1649	1825	1822	980	1619	1731	2155	1647	2011	1558	1159	1469	1488	1308	1445	1244	1720	1404	1539	1332	874	1380
ENSONIG00000010622	GL831134.1;GL831134.1;GL831134.1;GL831134.1	11804535;11805500;11806055;11806437	11804630;11805608;11806227;11806622	+;+;+;+	564	6	30	5	13	6	12	12	21	15	9	31	6	7	15	33	21	19	4	13	4	14	13	5	9	7	5	12	11	4	13
ENSONIG00000010623	GL831134.1;GL831134.1;GL831134.1;GL831134.1	11811464;11813416;11816182;11816617	11812229;11813871;11816462;11818315	+;+;+;+	3202	0	4	4	5	0	0	0	2	4	1	1	1	16	4	0	9	0	2	1	1	0	2	18	1	0	6	1	1	0	0
ENSONIG00000010624	GL831134.1;GL831134.1;GL831134.1;GL831134.1;GL831134.1;GL831134.1;GL831134.1	11822346;11822604;11823234;11823476;11823825;11825766;11827112	11822513;11822690;11823284;11823666;11823923;11825894;11827226	-;-;-;-;-;-;-	840	5477	7859	3662	6857	6341	11427	5244	7321	6184	6194	6401	4397	6229	7822	7984	6076	7409	5576	4924	5195	5038	5254	6595	5746	5470	5679	4918	5056	3441	4579
ENSONIG00000010628	GL831134.1;GL831134.1;GL831134.1;GL831134.1;GL831134.1;GL831134.1;GL831134.1;GL831134.1;GL831134.1;GL831134.1;GL831134.1;GL831134.1;GL831134.1;GL831134.1;GL831134.1;GL831134.1	11831076;11831838;11832266;11833377;11833858;11834110;11834291;11835014;11836080;11836244;11836698;11838803;11839134;11839335;11839941;11840131	11831242;11831971;11832325;11833480;11833952;11834214;11834417;11835074;11836153;11836305;11836773;11838934;11839227;11839410;11840034;11840232	-;-;-;-;-;-;-;-;-;-;-;-;-;-;-;-	1563	57	34	28	55	42	73	19	94	35	55	24	34	54	90	97	64	42	18	39	71	31	74	68	47	58	78	33	46	24	31
ENSONIG00000010631	GL831134.1;GL831134.1;GL831134.1;GL831134.1;GL831134.1;GL831134.1;GL831134.1;GL831134.1;GL831134.1	11845568;11845749;11845965;11846632;11847303;11847478;11847529;11847758;11847976	11845664;11845872;11846089;11846761;11847463;11847503;11847661;11847881;11848105	+;+;+;+;+;+;+;+;+	1050	82	184	70	144	133	200	90	183	118	104	115	94	180	148	284	98	169	140	106	83	122	127	153	102	206	110	176	121	48	110
ENSONIG00000010633	GL831134.1;GL831134.1;GL831134.1;GL831134.1;GL831134.1;GL831134.1;GL831134.1;GL831134.1;GL831134.1;GL831134.1;GL831134.1;GL831134.1;GL831134.1;GL831134.1;GL831134.1;GL831134.1;GL831134.1;GL831134.1;GL831134.1;GL831134.1;GL831134.1;GL831134.1;GL831134.1;GL831134.1;GL831134.1;GL831134.1;GL831134.1;GL831134.1;GL831134.1;GL831134.1;GL831134.1;GL831134.1;GL831134.1;GL831134.1;GL831134.1;GL831134.1;GL8…	11847758;11847976;11850082;11853796;11853803;11857514;11857514;11857803;11857803;11858059;11858097;11858872;11858872;11859075;11859075;11859231;11859231;11859460;11859460;11859641;11859641;11862357;11862357;11862656;11862656;11862887;11862887;11863882;11863882;11865195;11865195;11865495;11865495;11865709;11865956;11865956;11866248;11866248;11867023;11867023;11867242;11867242;11868656;11868788;118…	11847881;11848148;11850803;11853865;11853865;11857687;11857687;11857884;11857982;11858167;11858167;11858955;11858955;11859144;11859144;11859365;11859365;11859532;11859532;11859772;11859772;11862524;11862524;11862813;11862813;11863075;11863075;11863943;11863943;11865345;11865345;11865584;11865617;11865726;11866106;11866106;11866368;11866368;11867147;11867147;11867405;11867405;11868706;11868919;118…	+;+;+;+;+;+;+;+;+;+;+;+;+;+;+;+;+;+;+;+;+;+;+;+;+;+;+;+;+;+;+;+;+;+;+;+;+;+;+;+;+;+;+;+;+;+;+;+;+;+;+;+;+;+;+;+;+;+;+;+;+;+;+	6804	150	212	62	164	98	142	160	102	91	181	179	160	139	180	153	204	34	44	40	64	99	83	114	116	110	85	85	75	93	118
ENSONIG00000010641	GL831134.1;GL831134.1;GL831134.1;GL831134.1	11882559;11883197;11883393;11883690	11883105;11883292;11883480;11884528	+;+;+;+	1570	21	24	12	21	15	20	23	23	36	20	27	18	9	17	43	25	15	6	11	5	13	25	25	25	6	10	15	10	9	5
ENSONIG00000010642	GL831134.1;GL831134.1;GL831134.1;GL831134.1	11893317;11893494;11894305;11895002	11894232;11894803;11894849;11895047	-;-;-;-	1579	0	0	0	0	0	0	0	0	0	1	0	0	0	0	0	0	0	0	0	0	0	0	0	0	0	0	0	0	1	0
ENSONIG00000010643	GL831134.1;GL831134.1;GL831134.1;GL831134.1	11896073;11897761;11898145;11898684	11896295;11897925;11898229;11898840	+;+;+;+	630	0	0	0	0	0	0	0	2	0	0	0	0	0	0	0	0	0	0	0	0	0	0	4	0	0	0	0	0	0	0
ENSONIG00000010655	GL831134.1;GL831134.1;GL831134.1;GL831134.1;GL831134.1;GL831134.1;GL831134.1;GL831134.1;GL831134.1	11934215;11936174;11936523;11936837;11937725;11937995;11938260;11938487;11938825	11934672;11936345;11936744;11937643;11937876;11938162;11938390;11938624;11938968	+;+;+;+;+;+;+;+;+	2392	145	247	142	158	175	228	155	389	244	260	178	153	198	155	235	236	381	235	269	198	152	195	164	206	251	172	265	170	86	131
ENSONIG00000010657	GL831134.1;GL831134.1;GL831134.1;GL831134.1;GL831134.1;GL831134.1	11940666;11944018;11944379;11944781;11945454;11946821	11943050;11944114;11944455;11944933;11945600;11946964	-;-;-;-;-;-	3003	1406	2173	1013	1908	1865	3013	1365	2230	1644	1809	2243	1213	1926	1962	2687	1718	2058	1489	1271	1484	1671	1653	1840	1463	3145	1681	1446	1190	906	1429
ENSONIG00000010659	GL831134.1;GL831134.1;GL831134.1;GL831134.1;GL831134.1;GL831134.1;GL831134.1	11948110;11948111;11948153;11948674;11948674;11949334;11949334	11948444;11948126;11948444;11948953;11948953;11949576;11949576	+;+;+;+;+;+;+	858	172	269	127	193	150	224	106	180	142	187	204	101	159	181	239	164	241	160	137	122	170	220	208	236	143	150	169	140	80	134
ENSONIG00000010660	GL831134.1;GL831134.1;GL831134.1;GL831134.1;GL831134.1;GL831134.1;GL831134.1;GL831134.1	11949203;11955632;11955874;11956964;11957296;11959373;11959664;11965070	11953926;11955765;11955992;11957138;11957418;11959527;11959875;11965415	-;-;-;-;-;-;-;-	5988	210	413	167	395	274	403	208	307	260	334	428	281	333	439	486	302	354	279	264	254	289	333	466	382	429	266	386	214	159	226
ENSONIG00000010661	GL831134.1;GL831134.1;GL831134.1;GL831134.1;GL831134.1;GL831134.1;GL831134.1	11965960;11966264;11966578;11967530;11967716;11967907;11968111	11966126;11966371;11966652;11967609;11967767;11967979;11970220	+;+;+;+;+;+;+	2665	848	1395	607	1090	1333	1401	841	1327	1216	830	1326	920	1156	1292	2022	981	1051	1010	807	912	986	1078	1297	1101	1082	924	858	757	462	882
ENSONIG00000010664	GL831134.1;GL831134.1;GL831134.1;GL831134.1;GL831134.1;GL831134.1;GL831134.1;GL831134.1;GL831134.1;GL831134.1;GL831134.1	11975712;11978125;11978387;11978387;11980040;11980062;11980302;11980302;11980702;11981734;11981734	11978279;11978279;11978555;11978533;11980200;11980200;11980411;11980411;11980713;11981808;11981808	-;-;-;-;-;-;-;-;-;-;-	3095	457	707	362	457	433	594	399	512	487	496	615	283	448	516	602	405	565	451	358	381	375	578	563	419	559	598	383	372	226	301
ENSONIG00000010667	GL831134.1;GL831134.1;GL831134.1;GL831134.1;GL831134.1;GL831134.1	11982125;11983298;11987201;11988802;11988949;11991485	11982331;11983442;11987280;11988872;11989012;11992955	+;+;+;+;+;+	2038	677	894	417	769	710	874	424	692	688	648	635	470	672	646	828	666	734	651	410	542	493	606	827	624	829	665	545	494	367	458
ENSONIG00000010668	GL831134.1;GL831134.1	12004935;12006961	12005161;12007968	-;-	1235	78	119	26	76	78	70	32	68	79	62	48	40	88	100	73	55	68	61	54	41	52	80	98	64	79	75	67	33	41	64
ENSONIG00000010669	GL831134.1;GL831134.1;GL831134.1;GL831134.1;GL831134.1;GL831134.1;GL831134.1;GL831134.1;GL831134.1;GL831134.1;GL831134.1	12022502;12022767;12023515;12023772;12024077;12024399;12024832;12025265;12025494;12025752;12026382	12022685;12022922;12023648;12023930;12024260;12024610;12025020;12025407;12025653;12025855;12026406	+;+;+;+;+;+;+;+;+;+;+	1650	11	20	8	16	24	8	11	35	12	38	55	9	15	23	19	25	58	14	19	9	25	40	46	51	0	25	16	18	18	19
ENSONIG00000010670	GL831134.1;GL831134.1;GL831134.1;GL831134.1;GL831134.1;GL831134.1;GL831134.1;GL831134.1	12047742;12052851;12053027;12053308;12053624;12054284;12054773;12055281	12052300;12052928;12053203;12053385;12053703;12054462;12054944;12055528	-;-;-;-;-;-;-;-	5571	95	146	82	119	112	113	70	110	116	86	79	69	120	99	168	94	133	99	107	95	78	125	114	98	103	91	67	88	43	95
ENSONIG00000010672	GL831134.1;GL831134.1;GL831134.1;GL831134.1;GL831134.1;GL831134.1;GL831134.1	12080982;12081154;12081387;12081563;12082358;12083765;12084041	12081063;12081290;12081456;12081711;12082444;12084013;12084082	-;-;-;-;-;-;-	816	5	26	3	14	8	7	6	8	5	18	4	1	15	5	10	6	14	12	6	14	8	14	10	6	21	10	4	5	5	9
ENSONIG00000010673	GL831134.1;GL831134.1;GL831134.1;GL831134.1;GL831134.1;GL831134.1;GL831134.1;GL831134.1;GL831134.1;GL831134.1;GL831134.1;GL831134.1;GL831134.1;GL831134.1;GL831134.1;GL831134.1;GL831134.1;GL831134.1;GL831134.1;GL831134.1;GL831134.1;GL831134.1;GL831134.1	12084930;12085754;12086746;12086746;12087454;12087454;12088406;12088406;12089105;12089105;12089235;12089235;12089502;12089502;12090159;12091578;12091760;12092037;12092387;12092647;12093697;12094226;12094226	12085926;12085926;12086899;12086899;12087609;12087609;12088557;12088557;12089154;12089154;12089396;12089396;12089622;12089587;12090167;12091721;12091786;12092132;12092483;12092850;12093791;12094596;12097636	+;+;+;+;+;+;+;+;+;+;+;+;+;+;+;+;+;+;+;+;+;+;+	5875	858	823	511	780	732	1246	623	932	790	830	578	495	648	1007	923	791	1067	660	583	601	659	599	593	753	752	747	615	676	390	598
ENSONIG00000010677	GL831134.1;GL831134.1;GL831134.1;GL831134.1;GL831134.1;GL831134.1;GL831134.1;GL831134.1;GL831134.1	12099129;12101378;12101583;12103640;12103997;12104212;12104396;12105800;12106893	12099627;12101503;12101727;12103763;12104100;12104308;12104545;12105983;12110802	+;+;+;+;+;+;+;+;+	5339	5	12	2	2	4	11	4	0	0	11	10	6	14	1	29	30	5	2	3	0	2	6	16	6	20	15	6	8	0	10
ENSONIG00000025477	GL831134.1;GL831134.1;GL831134.1;GL831134.1	12113052;12114737;12114912;12115083	12114623;12114819;12114965;12115316	-;-;-;-	1943	18	28	21	9	23	13	21	73	22	2	0	36	13	33	67	18	14	24	10	2	19	53	9	6	15	6	27	25	9	8
ENSONIG00000010679	GL831134.1;GL831134.1;GL831134.1;GL831134.1;GL831134.1;GL831134.1;GL831134.1;GL831134.1;GL831134.1;GL831134.1;GL831134.1;GL831134.1;GL831134.1;GL831134.1;GL831134.1;GL831134.1;GL831134.1;GL831134.1;GL831134.1;GL831134.1;GL831134.1;GL831134.1;GL831134.1;GL831134.1;GL831134.1;GL831134.1;GL831134.1;GL831134.1;GL831134.1;GL831134.1;GL831134.1;GL831134.1;GL831134.1;GL831134.1;GL831134.1;GL831134.1;GL8…	12115450;12115850;12115856;12116108;12116108;12116108;12116275;12116275;12116275;12116579;12116579;12116579;12117866;12117866;12117866;12118074;12118074;12118074;12118324;12118324;12118324;12118532;12118532;12118532;12119589;12119589;12119589;12119810;12119810;12119810;12120106;12120106;12120106;12120765;12120765;12120765;12120980;12121109;12122178;12122178;12122182;12122358;12122358;12122358;121…	12116021;12116021;12116024;12116196;12116196;12116196;12116454;12116454;12116454;12116719;12116719;12116719;12117972;12117972;12117972;12118233;12118233;12118233;12118453;12118453;12118447;12118740;12118740;12118740;12119726;12119726;12119726;12119974;12119974;12119974;12120300;12120300;12120300;12120875;12120880;12120897;12121000;12121133;12122281;12122281;12122281;12122549;12122549;12122549;121…	-;-;-;-;-;-;-;-;-;-;-;-;-;-;-;-;-;-;-;-;-;-;-;-;-;-;-;-;-;-;-;-;-;-;-;-;-;-;-;-;-;-;-;-;-;-;-;-;-;-;-;-;-;-;-;-;-;-;-;-;-;-	3308	99	222	62	49	106	132	89	165	107	78	90	39	122	110	127	86	137	90	64	66	93	75	80	138	211	129	130	106	46	86
ENSONIG00000010683	GL831134.1;GL831134.1;GL831134.1;GL831134.1;GL831134.1;GL831134.1	12127031;12127193;12127384;12127547;12133750;12134063	12127107;12127289;12127466;12127677;12133918;12134279	-;-;-;-;-;-	774	303	496	223	318	310	500	291	419	320	330	400	231	295	426	559	356	419	318	186	246	274	297	304	299	668	331	287	286	182	296
ENSONIG00000010685	GL831134.1;GL831134.1;GL831134.1;GL831134.1;GL831134.1;GL831134.1;GL831134.1;GL831134.1;GL831134.1;GL831134.1;GL831134.1	12138382;12139819;12139975;12140361;12140893;12141139;12141549;12142066;12142304;12142652;12142806	12138966;12139876;12140107;12140500;12141061;12141248;12141692;12142203;12142393;12142731;12143616	+;+;+;+;+;+;+;+;+;+;+	2458	6490	8348	4530	7438	7883	8980	5820	7746	7338	7483	8469	5878	8164	7825	8881	7300	7757	6069	4655	6186	6634	7294	7858	7201	4895	6099	4674	5154	3423	5753
ENSONIG00000022215	GL831134.1	12140155	12140229	+	75	2	11	3	11	0	2	0	10	14	7	20	2	0	1	2	6	10	1	1	3	5	8	11	6	2	3	9	9	3	8
ENSONIG00000022099	GL831134.1	12140712	12140786	+	75	11	26	10	21	12	18	10	28	25	11	25	6	15	18	21	17	12	11	8	15	18	28	31	19	8	9	8	10	4	21
ENSONIG00000021770	GL831134.1	12141286	12141465	+	180	2	11	5	12	10	8	2	17	14	6	11	4	7	3	0	3	9	5	4	10	5	13	13	14	0	4	2	1	6	9
ENSONIG00000022217	GL831134.1	12141758	12141941	+	184	1	37	10	18	8	10	7	16	18	12	16	10	9	2	7	11	12	13	5	13	8	25	34	29	2	9	10	3	4	12
ENSONIG00000021439	GL831134.1	12156655	12157824	-	1170	2	4	5	0	0	3	1	4	0	0	0	2	0	13	0	1	0	4	1	8	2	4	2	0	0	6	0	4	3	0
ENSONIG00000010689	GL831134.1;GL831134.1;GL831134.1;GL831134.1;GL831134.1;GL831134.1;GL831134.1;GL831134.1;GL831134.1;GL831134.1;GL831134.1;GL831134.1;GL831134.1;GL831134.1	12176828;12180876;12181087;12183744;12184037;12185501;12186962;12187777;12187963;12188403;12192696;12195850;12196570;12196889	12176854;12180977;12181252;12183871;12184111;12185622;12187022;12187874;12188026;12188544;12192828;12196066;12196715;12196946	-;-;-;-;-;-;-;-;-;-;-;-;-;-	1539	209	396	131	225	282	276	190	230	232	252	239	119	204	190	233	186	259	249	176	209	212	232	216	295	104	185	195	218	96	200
ENSONIG00000010692	GL831134.1;GL831134.1;GL831134.1;GL831134.1	12212822;12213116;12213563;12213982	12212985;12213286;12213758;12214266	+;+;+;+	816	2	2	0	0	0	8	5	2	2	1	2	1	2	3	6	8	12	5	0	0	1	0	2	1	3	6	1	1	0	3
ENSONIG00000010693	GL831134.1;GL831134.1;GL831134.1;GL831134.1;GL831134.1;GL831134.1;GL831134.1;GL831134.1;GL831134.1;GL831134.1;GL831134.1;GL831134.1;GL831134.1;GL831134.1;GL831134.1;GL831134.1;GL831134.1;GL831134.1;GL831134.1;GL831134.1	12216908;12217467;12217772;12218393;12218866;12219050;12220516;12221072;12221748;12222474;12223093;12223383;12223714;12224884;12225279;12225748;12226038;12226354;12226583;12227527	12217323;12217676;12218022;12218638;12218951;12219155;12220668;12221206;12221872;12222555;12223257;12223486;12223885;12224990;12225400;12225826;12226208;12226471;12226734;12227797	+;+;+;+;+;+;+;+;+;+;+;+;+;+;+;+;+;+;+;+	3271	481	916	467	597	629	802	320	640	677	620	586	383	653	676	693	526	583	506	389	466	482	553	582	581	827	518	462	410	204	526
ENSONIG00000010699	GL831134.1;GL831134.1;GL831134.1;GL831134.1;GL831134.1;GL831134.1;GL831134.1	12232542;12232549;12232641;12233445;12233445;12234437;12234437	12232910;12232566;12232910;12233628;12233628;12234624;12234564	-;-;-;-;-;-;-	741	0	0	0	0	0	0	0	0	0	0	0	0	0	0	0	0	0	0	0	0	0	0	0	0	0	0	0	0	0	0
[truncated: 26,300 more rows]
